# Supplementary material for: Transcriptomic Modulation Reveals the Specific Cellular Response in Chinese Sea Bass (Lateolabrax maculatus) Gills under Salinity Change and Alkalinity Stress
Source: MDPI journal article supplement (doi:10.3390/ijms24065877), 2023-03-20
Supplement: s1 [file s1]

|  | Family     | genes   | No. of<br>Exons | Gene ID        | Scaffold ID  | Start   | End     | Gene<br>size (bp) | Strand |
|--|------------|---------|-----------------|----------------|--------------|---------|---------|-------------------|--------|
|  | <b>sod</b> | sod1    | 5               | GLEAN_10001859 | scaffold695  | 133545  | 137402  | 3857              | -      |
|  |            | sod2    | 5               | GLEAN_10012279 | scaffold102  | 1457470 | 1459545 | 2075              | +      |
|  |            | sod3b   | 1               | GLEAN_10015360 | scaffold199  | 2137637 | 2138269 | 632               | -      |
|  | <b>gpx</b> | gpx1    |                 |                |              |         |         |                   |        |
|  |            | gpx1a1  | 2               | GLEAN_10018729 | scaffold96   | 4129631 | 4130954 | 1323              | -      |
|  |            | gpx1a2  | 1               | GLEAN_10020004 | C5878552     | 1       | 192     | 191               | -      |
|  |            | gpx1a3  | 1               | GLEAN_10020005 | C6483015     | 1       | 123     | 122               | -      |
|  |            | gpx2    |                 |                |              |         |         |                   |        |
|  |            | gpx2a   | 1               | GLEAN_10017570 | scaffold163  | 785498  | 785878  | 380               | -      |
|  |            | gpx2b   | 1               | GLEAN_10020409 | scaffold163  | 786401  | 786511  | 110               | -      |
|  |            | gpx3    | 4               | GLEAN_10018137 | scaffold217  | 3788394 | 3820319 | 31925             | +      |
|  |            | gpx4    |                 |                |              |         |         |                   |        |
|  |            | gpx4a1  | 6               | GLEAN_10020465 | scaffold50   | 71373   | 73307   | 1934              | +      |
|  |            | gpx4a2  | 4               | GLEAN_10020464 | scaffold50   | 71636   | 73307   | 1671              | +      |
|  |            | gpx7    | 7               | GLEAN_10014809 | scaffold17   | 32089   | 68691   | 36602             | +      |
|  |            | gpx9    | 5               | GLEAN_10009555 | scaffold192  | 942268  | 943799  | 1531              | -      |
|  | <b>cat</b> | cat     | 14              | GLEAN_10012199 | scaffold147  | 1237805 | 1251044 | 13239             | +      |
|  | <b>gst</b> | gst     |                 |                |              |         |         |                   |        |
|  |            | gsta    | 6               | GLEAN_10017743 | scaffold43   | 553487  | 556683  | 3196              | -      |
|  |            | gstk1   | 4               | GLEAN_10000407 | C7150537     | 288     | 1167    | 879               | -      |
|  |            | gstm4   | 8               | GLEAN_10017280 | scaffold60   | 699378  | 702295  | 2917              | +      |
|  |            | gstr    | 13              | GLEAN_10013168 | scaffold584  | 485940  | 502753  | 16813             | +      |
|  |            | gstr2   | 6               | GLEAN_10013167 | scaffold584  | 480702  | 483074  | 2372              | +      |
|  |            | gstt1   | 4               | GLEAN_10015211 | scaffold216  | 1713405 | 1716927 | 3522              | +      |
|  |            | gstt2   | 5               | GLEAN_10002723 | scaffold162  | 6228    | 8525    | 2297              | +      |
|  |            | mgst    |                 |                |              |         |         |                   |        |
|  |            | mgst1   | 3               | GLEAN_10003971 | scaffold442  | 150081  | 151908  | 1827              | +      |
|  |            | mgst2   | 7               | GLEAN_10002172 | scaffold1055 | 58981   | 65147   | 6166              | +      |
|  |            | mgst3   | 7               | GLEAN_10007782 | scaffold432  | 251768  | 255620  | 3852              | -      |
|  |            | mgst3b  | 4               | GLEAN_10017674 | scaffold163  | 3539044 | 3540462 | 1418              | +      |
|  | <b>cyp</b> | cyp1    |                 |                |              |         |         |                   |        |
|  |            | cyp1a   | 9               | GLEAN_10010754 | scaffold205  | 88714   | 95044   | 6330              | -      |
|  |            | cyp1b1* | 2               | GLEAN_10016652 | scaffold172  | 2119967 | 2122220 | 2253              | -      |
|  |            | cyp1c1  | 1               | GLEAN_10017593 | scaffold163  | 1318492 | 1320069 | 1577              | +      |
|  |            | cyp1c2  | 1               | GLEAN_10017594 | scaffold163  | 1322543 | 1324117 | 1574              | +      |
|  |            | cyp1d1  | 8               | GLEAN_10019218 | scaffold86   | 7538085 | 7542792 | 4707              | -      |
|  |            | cyp2    |                 |                |              |         |         |                   |        |
|  |            | cyp2f2  | 20              | GLEAN_10005479 | scaffold21   | 478751  | 499000  | 20249             | -      |
|  |            | cyp2j2  | 9               | GLEAN_10015623 | scaffold38   | 200952  | 204333  | 3381              | +      |
|  |            | cyp2k1  | 16              | GLEAN_10004424 | scaffold639  | 41029   | 58701   | 17672             | +      |
|  |            | cyp2n13 | 18              | GLEAN_10004065 | scaffold132  | 379617  | 392417  | 12800             | -      |
|  |            | cyp2r1  | 5               | GLEAN_10009810 | scaffold68   | 712491  | 715624  | 3133              | +      |
|  |            | cyp2y3  | 16              | GLEAN_10015567 | scaffold23   | 1525644 | 1538767 | 13123             | +      |
|  |            | cyp3    |                 |                |              |         |         |                   |        |
|  |            | cyp3a30 | 13              | GLEAN_10016462 | scaffold229  | 385065  | 390525  | 5460              | +      |
|  |            | cyp3a65 | 12              | GLEAN_10013957 | scaffold19   | 334444  | 339309  | 4865              | -      |
|  |            | cyp4    |                 |                |              |         |         |                   |        |
|  |            | cyp4f3  | 22              | GLEAN_10004161 | scaffold455  | 12660   | 22142   | 9482              | +      |
|  |            | cyp4v8  | 11              | GLEAN_10014003 | scaffold19   | 1396427 | 1403682 | 7255              | +      |
|  |            | cyp19   |                 |                |              |         |         |                   |        |
|  |            | cyp19a1 | 9               | GLEAN_10006463 | scaffold24   | 71824   | 75004   | 3180              | +      |
|  |            | cyp51   |                 |                |              |         |         |                   |        |
|  |            | cyp51a1 | 10              | GLEAN_10003044 | scaffold202  | 60954   | 64485   | 3531              | -      |
