# Supplementary material for: Transcriptomic Modulation Reveals the Specific Cellular Response in Chinese Sea Bass (Lateolabrax maculatus) Gills under Salinity Change and Alkalinity Stress
Source: MDPI journal article supplement (doi:10.3390/ijms24065877), 2023-03-20
Supplement: s1 [file s1]

**Figure S1:** Differential gene expression and functional GO enrichment of DEGs in *L. maculatus* gills under salinity change. (a) Heat map for expressed DEGs; (b) Number of DEGs between groups; (c) DEGs shown as the Venn diagram between the salinity groups; (d) Functional GO enrichment of the salinity DEGs at level 3.

**Figure S2:** Differential gene expression and functional GO enrichment of DEGs in *L. maculatus* gills under alkalinity stress. (a) Heat map for expressed DEGs; (b) Number of DEGs between groups; (c) DEGs shown as the Venn diagram between the alkalinity groups; (d) Functional GO enrichment of the alkalinity DEGs at level 3.

**Figure S3:** Expression profiles of the overlapped DEGs in response to salinity change and alkalinity stress.

**Figure S4:** Modulation from the WGCNA.

**Figure S5:** Expression profiles of some functional DEGs in response to salinity change and alkalinity stress. (a) transport related DEGs; (b) ECM related DEGs; (c) filament related DEGs.

**Figure S6:** The GO enrichment and gene network of alkaline specific SRMs in *L. maculatus* gills, as the (a) blue, (b) royalblue and (c) lightyellow modules with top 300 genes ranking with their connectivity. The circle size represents the intramodular connectivity (Kwithin), and the circle frame color represents the annotated GO terms; \*\* indicate  $P < 0.001$ .

**Figure S7:** The GO enrichment and gene network of saline specific SRMs in *L. maculatus* gills, as the (a) cyan, (b) black and (c) darkgreen modules with top 300 genes ranking with their connectivity. The circle size represents the intramodular connectivity (Kwithin), and the circle frame color represents the annotated GO terms; \* indicate  $P < 0.05$  and \*\* indicate  $P < 0.001$ .

**Table S1:** GO enrichment of the DEGs from *L. maculatus* gills under salinity change and alkalinity stress, respectively.

**Table S2:** GO enrichment of the DEGs from the combined salinity and alkalinity stresses of *L. maculatus* gills.

**Table S3:** General information for the modules of WGCNA.

**Table S4:** Identification of SRMs.

**Table S5:** Summarized information of the conventional *L. maculatus* antioxidative genes.

**Table S6:** GO enrichment of each SRM.
