# Supplementary material for: Transcriptomic Modulation Reveals the Specific Cellular Response in Chinese Sea Bass (Lateolabrax maculatus) Gills under Salinity Change and Alkalinity Stress
Source: Int J Mol Sci. 2023 Mar 20;24(6):5877. doi: 10.3390/ijms24065877 (PMC10056482; doi:10.3390/ijms24065877)
Supplement: Supplementary file 1 [file ijms-24-05877-s001.zip]

Archive with 14 entries (14 files):
- Figure S1.Salinity-DEG-1.5new.tif
- Figure S2.Alkalinity-DEG-1.5new.tif
- Figure S3.Overlapped DEG HeatMap.tif
- Figure S4.WGCNA.tif
- Figure S5.GO DEG HeatMap3(小).tif
- Figure S6.Alka SRMs.new.tif
- Figure S7.Sali SRMs.new.tif
- Supplementary Figures and Tables Legends.pdf
- Table S1.DEG GO-1.5-top15.xlsx
- Table S2.Combined DEG GO-1.5-top15.xlsx
- Table S3.WGCNA info.xlsx
- Table S4.SRM-DEG Corelation.xls
- Table S5.Oxi gene info.new.pdf
- Table S6.SRM GO.xlsx
