# Supplementary material for: Transcriptomic Modulation Reveals the Specific Cellular Response in Chinese Sea Bass (Lateolabrax maculatus) Gills under Salinity Change and Alkalinity Stress
Source: Int J Mol Sci. 2023 Mar 20;24(6):5877. doi: 10.3390/ijms24065877 (PMC10056482; doi:10.3390/ijms24065877)
Supplement: Supplementary file 1 [file ijms-24-05877-s001.zip › Table S1.DEG GO-1.5-top15.xlsx]

## Sheet: 0-12 up
GO_ID	GO_Term	GO_Class	Pvalue	AdjustedPv	x1	x2	n	N	EnrichDirect	GOlevl	GeneID
GO:0009653	anatomical structure morphogenesis	BP	0.00052887	0.0524169	16	2598	37	13395	Over	3	Lateolabrax_maculatus_GLEAN_10001989,Lateolabrax_maculatus_GLEAN_10008648,Lateolabrax_maculatus_GLEAN_10009775,Lateolabrax_maculatus_GLEAN_10009958,Lateolabrax_maculatus_GLEAN_10011564,Lateolabrax_maculatus_GLEAN_10012420,Lateolabrax_maculatus_GLEAN_10014554,Lateolabrax_maculatus_GLEAN_10014962,Lateolabrax_maculatus_GLEAN_10016265,Lateolabrax_maculatus_GLEAN_10016318,Lateolabrax_maculatus_GLEAN_1…
GO:0005576	extracellular region	CC	0.000770726	0.0687488	5	266	37	13395	Over	3	Lateolabrax_maculatus_GLEAN_10013024,Lateolabrax_maculatus_GLEAN_10016318,Lateolabrax_maculatus_GLEAN_10017828,Lateolabrax_maculatus_GLEAN_10018996,Lateolabrax_maculatus_GLEAN_10022823
GO:0031012	extracellular matrix	CC	0.00141378	0.102663	4	178	37	13395	Over	3	Lateolabrax_maculatus_GLEAN_10016318,Lateolabrax_maculatus_GLEAN_10017828,Lateolabrax_maculatus_GLEAN_10018996,Lateolabrax_maculatus_GLEAN_10022823
GO:0045103	intermediate filament-based process	BP	0.0018109	0.102663	2	23	37	13395	Over	3	Lateolabrax_maculatus_GLEAN_10016265,Lateolabrax_maculatus_GLEAN_10019146
GO:0048856	anatomical structure development	BP	0.0074318	0.161687	21	4623	37	13395	Over	3	Lateolabrax_maculatus_GLEAN_10001989,Lateolabrax_maculatus_GLEAN_10003926,Lateolabrax_maculatus_GLEAN_10007205,Lateolabrax_maculatus_GLEAN_10008648,Lateolabrax_maculatus_GLEAN_10009775,Lateolabrax_maculatus_GLEAN_10009958,Lateolabrax_maculatus_GLEAN_10011564,Lateolabrax_maculatus_GLEAN_10012420,Lateolabrax_maculatus_GLEAN_10013024,Lateolabrax_maculatus_GLEAN_10014554,Lateolabrax_maculatus_GLEAN_1…
GO:0098794	postsynapse	CC	0.0155066	0.219554	2	69	37	13395	Over	3	Lateolabrax_maculatus_GLEAN_10009958,Lateolabrax_maculatus_GLEAN_10016265
GO:0043256	laminin complex	CC	0.0380026	0.33037	1	14	37	13395	Over	3	Lateolabrax_maculatus_GLEAN_10016318
GO:0002252	immune effector process	BP	0.0450491	0.349605	3	289	37	13395	Over	3	Lateolabrax_maculatus_GLEAN_10007205,Lateolabrax_maculatus_GLEAN_10021760,Lateolabrax_maculatus_GLEAN_10022340
GO:0051050	positive regulation of transport	BP	0.0473914	0.349605	3	295	37	13395	Over	3	Lateolabrax_maculatus_GLEAN_10001989,Lateolabrax_maculatus_GLEAN_10007205,Lateolabrax_maculatus_GLEAN_10011936
GO:0032989	cellular component morphogenesis	BP	0.000135551	0.0189931	10	916	37	13395	Over	4	Lateolabrax_maculatus_GLEAN_10001989,Lateolabrax_maculatus_GLEAN_10008648,Lateolabrax_maculatus_GLEAN_10009958,Lateolabrax_maculatus_GLEAN_10011564,Lateolabrax_maculatus_GLEAN_10014962,Lateolabrax_maculatus_GLEAN_10016265,Lateolabrax_maculatus_GLEAN_10016318,Lateolabrax_maculatus_GLEAN_10017828,Lateolabrax_maculatus_GLEAN_10019146,Lateolabrax_maculatus_GLEAN_10022693
GO:0045104	intermediate filament cytoskeleton organization	BP	0.00150835	0.102663	2	21	37	13395	Over	4	Lateolabrax_maculatus_GLEAN_10016265,Lateolabrax_maculatus_GLEAN_10019146
GO:0006956	complement activation	BP	0.0018109	0.102663	2	23	37	13395	Over	4	Lateolabrax_maculatus_GLEAN_10021760,Lateolabrax_maculatus_GLEAN_10022340
GO:0006959	humoral immune response	BP	0.00328241	0.108441	2	31	37	13395	Over	4	Lateolabrax_maculatus_GLEAN_10021760,Lateolabrax_maculatus_GLEAN_10022340
GO:0032836	glomerular basement membrane development	BP	0.00551703	0.144317	1	2	37	13395	Over	4	Lateolabrax_maculatus_GLEAN_10016318
GO:0090066	regulation of anatomical structure size	BP	0.00561354	0.144317	4	261	37	13395	Over	4	Lateolabrax_maculatus_GLEAN_10007205,Lateolabrax_maculatus_GLEAN_10009958,Lateolabrax_maculatus_GLEAN_10012420,Lateolabrax_maculatus_GLEAN_10019146
GO:0016021	integral component of membrane	CC	0.00781307	0.162076	8	1072	37	13395	Over	4	Lateolabrax_maculatus_GLEAN_10003926,Lateolabrax_maculatus_GLEAN_10007205,Lateolabrax_maculatus_GLEAN_10007878,Lateolabrax_maculatus_GLEAN_10008648,Lateolabrax_maculatus_GLEAN_10011936,Lateolabrax_maculatus_GLEAN_10012420,Lateolabrax_maculatus_GLEAN_10017828,Lateolabrax_maculatus_GLEAN_10022970
GO:0099572	postsynaptic specialization	CC	0.0138436	0.202434	2	65	37	13395	Over	4	Lateolabrax_maculatus_GLEAN_10009958,Lateolabrax_maculatus_GLEAN_10016265
GO:0000902	cell morphogenesis	BP	0.0180584	0.24042	7	1000	37	13395	Over	4	Lateolabrax_maculatus_GLEAN_10008648,Lateolabrax_maculatus_GLEAN_10009958,Lateolabrax_maculatus_GLEAN_10011564,Lateolabrax_maculatus_GLEAN_10016265,Lateolabrax_maculatus_GLEAN_10016318,Lateolabrax_maculatus_GLEAN_10017828,Lateolabrax_maculatus_GLEAN_10019146
GO:0021543	pallium development	BP	0.0214651	0.26749	2	82	37	13395	Over	4	Lateolabrax_maculatus_GLEAN_10016265,Lateolabrax_maculatus_GLEAN_10019146
GO:0022804	active transmembrane transporter activity	MF	0.0214815	0.26749	3	216	37	13395	Over	4	Lateolabrax_maculatus_GLEAN_10007205,Lateolabrax_maculatus_GLEAN_10011936,Lateolabrax_maculatus_GLEAN_10012420
GO:0006884	cell volume homeostasis	BP	0.021891	0.26749	1	8	37	13395	Over	4	Lateolabrax_maculatus_GLEAN_10012420
GO:0008092	cytoskeletal protein binding	MF	0.0284332	0.309297	5	630	37	13395	Over	4	Lateolabrax_maculatus_GLEAN_10009958,Lateolabrax_maculatus_GLEAN_10011936,Lateolabrax_maculatus_GLEAN_10014962,Lateolabrax_maculatus_GLEAN_10016265,Lateolabrax_maculatus_GLEAN_10022693
GO:0043270	positive regulation of ion transport	BP	0.032169	0.322141	2	102	37	13395	Over	4	Lateolabrax_maculatus_GLEAN_10001989,Lateolabrax_maculatus_GLEAN_10007205
GO:0048731	system development	BP	0.0328641	0.322141	16	3542	37	13395	Over	4	Lateolabrax_maculatus_GLEAN_10001989,Lateolabrax_maculatus_GLEAN_10003926,Lateolabrax_maculatus_GLEAN_10008648,Lateolabrax_maculatus_GLEAN_10009958,Lateolabrax_maculatus_GLEAN_10011564,Lateolabrax_maculatus_GLEAN_10012420,Lateolabrax_maculatus_GLEAN_10013024,Lateolabrax_maculatus_GLEAN_10014554,Lateolabrax_maculatus_GLEAN_10014591,Lateolabrax_maculatus_GLEAN_10016265,Lateolabrax_maculatus_GLEAN_1…
GO:0045109	intermediate filament organization	BP	0.00011059	0.0189931	2	6	37	13395	Over	5	Lateolabrax_maculatus_GLEAN_10016265,Lateolabrax_maculatus_GLEAN_10019146
GO:0003292	cardiac septum cell differentiation	BP	0.00276222	0.102663	1	1	37	13395	Over	5	Lateolabrax_maculatus_GLEAN_10001989
GO:0048858	cell projection morphogenesis	BP	0.00327758	0.108441	7	725	37	13395	Over	5	Lateolabrax_maculatus_GLEAN_10008648,Lateolabrax_maculatus_GLEAN_10009958,Lateolabrax_maculatus_GLEAN_10011564,Lateolabrax_maculatus_GLEAN_10016265,Lateolabrax_maculatus_GLEAN_10016318,Lateolabrax_maculatus_GLEAN_10017828,Lateolabrax_maculatus_GLEAN_10019146
GO:0032990	cell part morphogenesis	BP	0.00327758	0.108441	7	725	37	13395	Over	5	Lateolabrax_maculatus_GLEAN_10008648,Lateolabrax_maculatus_GLEAN_10009958,Lateolabrax_maculatus_GLEAN_10011564,Lateolabrax_maculatus_GLEAN_10016265,Lateolabrax_maculatus_GLEAN_10016318,Lateolabrax_maculatus_GLEAN_10017828,Lateolabrax_maculatus_GLEAN_10019146
GO:0031102	neuron projection regeneration	BP	0.00349517	0.111346	2	32	37	13395	Over	5	Lateolabrax_maculatus_GLEAN_10016265,Lateolabrax_maculatus_GLEAN_10019146
GO:0008504	monoamine transmembrane transporter activity	MF	0.00826442	0.163819	1	3	37	13395	Over	5	Lateolabrax_maculatus_GLEAN_10011936
GO:0043062	extracellular structure organization	BP	0.00900164	0.174553	4	299	37	13395	Over	5	Lateolabrax_maculatus_GLEAN_10016318,Lateolabrax_maculatus_GLEAN_10018996,Lateolabrax_maculatus_GLEAN_10022823,Lateolabrax_maculatus_GLEAN_10022960
GO:1901219	regulation of cardiac chamber morphogenesis	BP	0.0110044	0.196319	1	4	37	13395	Over	5	Lateolabrax_maculatus_GLEAN_10001989
GO:0005328	neurotransmitter:sodium symporter activity	MF	0.0110044	0.196319	1	4	37	13395	Over	5	Lateolabrax_maculatus_GLEAN_10011936
GO:1903793	positive regulation of anion transport	BP	0.0110044	0.196319	1	4	37	13395	Over	5	Lateolabrax_maculatus_GLEAN_10007205
GO:0097435	supramolecular fiber organization	BP	0.0129847	0.202434	4	333	37	13395	Over	5	Lateolabrax_maculatus_GLEAN_10001989,Lateolabrax_maculatus_GLEAN_10009958,Lateolabrax_maculatus_GLEAN_10016265,Lateolabrax_maculatus_GLEAN_10019146
GO:0014069	postsynaptic density	CC	0.0138436	0.202434	2	65	37	13395	Over	5	Lateolabrax_maculatus_GLEAN_10009958,Lateolabrax_maculatus_GLEAN_10016265
GO:0098984	neuron to neuron synapse	CC	0.0138436	0.202434	2	65	37	13395	Over	5	Lateolabrax_maculatus_GLEAN_10009958,Lateolabrax_maculatus_GLEAN_10016265
GO:0048666	neuron development	BP	0.0145399	0.209188	7	958	37	13395	Over	5	Lateolabrax_maculatus_GLEAN_10008648,Lateolabrax_maculatus_GLEAN_10009958,Lateolabrax_maculatus_GLEAN_10011564,Lateolabrax_maculatus_GLEAN_10016265,Lateolabrax_maculatus_GLEAN_10016318,Lateolabrax_maculatus_GLEAN_10017828,Lateolabrax_maculatus_GLEAN_10019146
GO:0061318	renal filtration cell differentiation	BP	0.0164624	0.222491	1	6	37	13395	Over	5	Lateolabrax_maculatus_GLEAN_10016318

## Sheet: 0-12 down
GO_ID	GO_Term	GO_Class	Pvalue	AdjustedPv	x1	x2	n	N	EnrichDirect	GOlevl	GeneID
GO:0005737	cytoplasm	CC	0.000388034	0.0579161	6	1842	9	13395	Over	3	Lateolabrax_maculatus_GLEAN_10010144,Lateolabrax_maculatus_GLEAN_10012560,Lateolabrax_maculatus_GLEAN_10012641,Lateolabrax_maculatus_GLEAN_10013088,Lateolabrax_maculatus_GLEAN_10022636,Lateolabrax_maculatus_GLEAN_10023060
GO:0009719	response to endogenous stimulus	BP	0.00316487	0.0766232	4	1027	9	13395	Over	3	Lateolabrax_maculatus_GLEAN_10010144,Lateolabrax_maculatus_GLEAN_10012641,Lateolabrax_maculatus_GLEAN_10013088,Lateolabrax_maculatus_GLEAN_10018461
GO:0051707	response to other organism	BP	0.00430454	0.0769868	3	529	9	13395	Over	3	Lateolabrax_maculatus_GLEAN_10002895,Lateolabrax_maculatus_GLEAN_10010144,Lateolabrax_maculatus_GLEAN_10022636
GO:0009607	response to biotic stimulus	BP	0.00473069	0.0769868	3	547	9	13395	Over	3	Lateolabrax_maculatus_GLEAN_10002895,Lateolabrax_maculatus_GLEAN_10010144,Lateolabrax_maculatus_GLEAN_10022636
GO:0045103	intermediate filament-based process	BP	0.0153524	0.143536	1	23	9	13395	Over	3	Lateolabrax_maculatus_GLEAN_10013088
GO:0042221	response to chemical	BP	0.0216197	0.165751	5	2744	9	13395	Over	3	Lateolabrax_maculatus_GLEAN_10002895,Lateolabrax_maculatus_GLEAN_10010144,Lateolabrax_maculatus_GLEAN_10012641,Lateolabrax_maculatus_GLEAN_10013088,Lateolabrax_maculatus_GLEAN_10018461
GO:0032963	collagen metabolic process	BP	0.0344109	0.201686	1	52	9	13395	Over	3	Lateolabrax_maculatus_GLEAN_10022636
GO:0051240	positive regulation of multicellular organismal process	BP	0.0346683	0.201686	2	450	9	13395	Over	3	Lateolabrax_maculatus_GLEAN_10002895,Lateolabrax_maculatus_GLEAN_10010144
GO:0051234	establishment of localization	BP	0.0359527	0.201686	5	3103	9	13395	Over	3	Lateolabrax_maculatus_GLEAN_10002895,Lateolabrax_maculatus_GLEAN_10012560,Lateolabrax_maculatus_GLEAN_10013088,Lateolabrax_maculatus_GLEAN_10018461,Lateolabrax_maculatus_GLEAN_10023060
GO:0007631	feeding behavior	BP	0.0460747	0.227896	1	70	9	13395	Over	3	Lateolabrax_maculatus_GLEAN_10010144
GO:0065008	regulation of biological quality	BP	0.0482787	0.235566	4	2237	9	13395	Over	3	Lateolabrax_maculatus_GLEAN_10002895,Lateolabrax_maculatus_GLEAN_10013088,Lateolabrax_maculatus_GLEAN_10018461,Lateolabrax_maculatus_GLEAN_10023060
GO:1901698	response to nitrogen compound	BP	0.000209722	0.048236	4	501	9	13395	Over	4	Lateolabrax_maculatus_GLEAN_10002895,Lateolabrax_maculatus_GLEAN_10012641,Lateolabrax_maculatus_GLEAN_10013088,Lateolabrax_maculatus_GLEAN_10018461
GO:0009725	response to hormone	BP	0.00083931	0.0579161	4	720	9	13395	Over	4	Lateolabrax_maculatus_GLEAN_10010144,Lateolabrax_maculatus_GLEAN_10012641,Lateolabrax_maculatus_GLEAN_10013088,Lateolabrax_maculatus_GLEAN_10018461
GO:0010035	response to inorganic substance	BP	0.001236	0.0579161	3	342	9	13395	Over	4	Lateolabrax_maculatus_GLEAN_10010144,Lateolabrax_maculatus_GLEAN_10012641,Lateolabrax_maculatus_GLEAN_10013088
GO:0010033	response to organic substance	BP	0.00431165	0.0769868	5	1894	9	13395	Over	4	Lateolabrax_maculatus_GLEAN_10002895,Lateolabrax_maculatus_GLEAN_10010144,Lateolabrax_maculatus_GLEAN_10012641,Lateolabrax_maculatus_GLEAN_10013088,Lateolabrax_maculatus_GLEAN_10018461
GO:0043207	response to external biotic stimulus	BP	0.0045382	0.0769868	3	539	9	13395	Over	4	Lateolabrax_maculatus_GLEAN_10002895,Lateolabrax_maculatus_GLEAN_10010144,Lateolabrax_maculatus_GLEAN_10022636
GO:0019215	intermediate filament binding	MF	0.00736878	0.0996953	1	11	9	13395	Over	4	Lateolabrax_maculatus_GLEAN_10013088
GO:0006805	xenobiotic metabolic process	BP	0.00736878	0.0996953	1	11	9	13395	Over	4	Lateolabrax_maculatus_GLEAN_10018461
GO:0006520	cellular amino acid metabolic process	BP	0.00849407	0.102655	2	214	9	13395	Over	4	Lateolabrax_maculatus_GLEAN_10012641,Lateolabrax_maculatus_GLEAN_10018461
GO:0016528	sarcoplasm	CC	0.00870336	0.102655	1	13	9	13395	Over	4	Lateolabrax_maculatus_GLEAN_10023060
GO:1901700	response to oxygen-containing compound	BP	0.0134032	0.137011	3	796	9	13395	Over	4	Lateolabrax_maculatus_GLEAN_10010144,Lateolabrax_maculatus_GLEAN_10012641,Lateolabrax_maculatus_GLEAN_10018461
GO:0009617	response to bacterium	BP	0.0137451	0.137273	2	275	9	13395	Over	4	Lateolabrax_maculatus_GLEAN_10002895,Lateolabrax_maculatus_GLEAN_10010144
GO:0045104	intermediate filament cytoskeleton organization	BP	0.0140257	0.137273	1	21	9	13395	Over	4	Lateolabrax_maculatus_GLEAN_10013088
GO:0016701	oxidoreductase activity, acting on single donors with incorporation of molecular oxygen	MF	0.0180008	0.153341	1	27	9	13395	Over	4	Lateolabrax_maculatus_GLEAN_10018461
GO:0046332	SMAD binding	MF	0.020643	0.165751	1	31	9	13395	Over	4	Lateolabrax_maculatus_GLEAN_10010144
GO:0005773	vacuole	CC	0.0227659	0.168908	2	359	9	13395	Over	4	Lateolabrax_maculatus_GLEAN_10012641,Lateolabrax_maculatus_GLEAN_10022636
GO:0014070	response to organic cyclic compound	BP	0.000569182	0.0579161	4	650	9	13395	Over	5	Lateolabrax_maculatus_GLEAN_10002895,Lateolabrax_maculatus_GLEAN_10010144,Lateolabrax_maculatus_GLEAN_10013088,Lateolabrax_maculatus_GLEAN_10018461
GO:0048545	response to steroid hormone	BP	0.00119463	0.0579161	3	338	9	13395	Over	5	Lateolabrax_maculatus_GLEAN_10010144,Lateolabrax_maculatus_GLEAN_10013088,Lateolabrax_maculatus_GLEAN_10018461
GO:0046683	response to organophosphorus	BP	0.00191974	0.0579161	2	100	9	13395	Over	5	Lateolabrax_maculatus_GLEAN_10010144,Lateolabrax_maculatus_GLEAN_10018461
GO:0019530	taurine metabolic process	BP	0.00201447	0.0579161	1	3	9	13395	Over	5	Lateolabrax_maculatus_GLEAN_10018461
GO:0044273	sulfur compound catabolic process	BP	0.00201447	0.0579161	1	3	9	13395	Over	5	Lateolabrax_maculatus_GLEAN_10018461
GO:0019694	alkanesulfonate metabolic process	BP	0.00201447	0.0579161	1	3	9	13395	Over	5	Lateolabrax_maculatus_GLEAN_10018461
GO:0010243	response to organonitrogen compound	BP	0.00304118	0.0766232	3	468	9	13395	Over	5	Lateolabrax_maculatus_GLEAN_10012641,Lateolabrax_maculatus_GLEAN_10013088,Lateolabrax_maculatus_GLEAN_10018461
GO:0045109	intermediate filament organization	BP	0.00402534	0.0769868	1	6	9	13395	Over	5	Lateolabrax_maculatus_GLEAN_10013088
GO:1901605	alpha-amino acid metabolic process	BP	0.00454071	0.0769868	2	155	9	13395	Over	5	Lateolabrax_maculatus_GLEAN_10012641,Lateolabrax_maculatus_GLEAN_10018461
GO:0097305	response to alcohol	BP	0.00471382	0.0769868	2	158	9	13395	Over	5	Lateolabrax_maculatus_GLEAN_10012641,Lateolabrax_maculatus_GLEAN_10018461
GO:0033993	response to lipid	BP	0.00485352	0.0769868	3	552	9	13395	Over	5	Lateolabrax_maculatus_GLEAN_10010144,Lateolabrax_maculatus_GLEAN_10013088,Lateolabrax_maculatus_GLEAN_10018461
GO:0071466	cellular response to xenobiotic stimulus	BP	0.00736878	0.0996953	1	11	9	13395	Over	5	Lateolabrax_maculatus_GLEAN_10018461
GO:0000323	lytic vacuole	CC	0.00789146	0.10089	2	206	9	13395	Over	5	Lateolabrax_maculatus_GLEAN_10012641,Lateolabrax_maculatus_GLEAN_10022636
GO:0002237	response to molecule of bacterial origin	BP	0.00811504	0.10089	2	209	9	13395	Over	5	Lateolabrax_maculatus_GLEAN_10002895,Lateolabrax_maculatus_GLEAN_10010144
GO:0043434	response to peptide hormone	BP	0.00811504	0.10089	2	209	9	13395	Over	5	Lateolabrax_maculatus_GLEAN_10012641,Lateolabrax_maculatus_GLEAN_10018461

## Sheet: 0-24 up
GO_ID	GO_Term	GO_Class	Pvalue	AdjustedPv	x1	x2	n	N	EnrichDirect	GOlevl	GeneID
GO:0045103	intermediate filament-based process	BP	6.82571e-05	0.0311935	3	23	47	13395	Over	3	Lateolabrax_maculatus_GLEAN_10007609,Lateolabrax_maculatus_GLEAN_10016265,Lateolabrax_maculatus_GLEAN_10019146
GO:0048856	anatomical structure development	BP	0.000526919	0.0688006	28	4623	47	13395	Over	3	Lateolabrax_maculatus_GLEAN_10000953,Lateolabrax_maculatus_GLEAN_10001506,Lateolabrax_maculatus_GLEAN_10003587,Lateolabrax_maculatus_GLEAN_10003926,Lateolabrax_maculatus_GLEAN_10004807,Lateolabrax_maculatus_GLEAN_10004812,Lateolabrax_maculatus_GLEAN_10004946,Lateolabrax_maculatus_GLEAN_10005364,Lateolabrax_maculatus_GLEAN_10005858,Lateolabrax_maculatus_GLEAN_10007205,Lateolabrax_maculatus_GLEAN_1…
GO:0005576	extracellular region	CC	0.00230861	0.150719	5	266	47	13395	Over	3	Lateolabrax_maculatus_GLEAN_10000953,Lateolabrax_maculatus_GLEAN_10005364,Lateolabrax_maculatus_GLEAN_10013024,Lateolabrax_maculatus_GLEAN_10017828,Lateolabrax_maculatus_GLEAN_10020950
GO:0006950	response to stress	BP	0.00378541	0.157267	16	2291	47	13395	Over	3	Lateolabrax_maculatus_GLEAN_10000774,Lateolabrax_maculatus_GLEAN_10002957,Lateolabrax_maculatus_GLEAN_10003273,Lateolabrax_maculatus_GLEAN_10004755,Lateolabrax_maculatus_GLEAN_10004812,Lateolabrax_maculatus_GLEAN_10007609,Lateolabrax_maculatus_GLEAN_10009555,Lateolabrax_maculatus_GLEAN_10012420,Lateolabrax_maculatus_GLEAN_10012515,Lateolabrax_maculatus_GLEAN_10013338,Lateolabrax_maculatus_GLEAN_1…
GO:0048589	developmental growth	BP	0.0130746	0.228597	5	403	47	13395	Over	3	Lateolabrax_maculatus_GLEAN_10004807,Lateolabrax_maculatus_GLEAN_10007609,Lateolabrax_maculatus_GLEAN_10009641,Lateolabrax_maculatus_GLEAN_10012420,Lateolabrax_maculatus_GLEAN_10013338
GO:0007275	multicellular organism development	BP	0.013294	0.228597	22	3929	47	13395	Over	3	Lateolabrax_maculatus_GLEAN_10000953,Lateolabrax_maculatus_GLEAN_10001506,Lateolabrax_maculatus_GLEAN_10003926,Lateolabrax_maculatus_GLEAN_10004807,Lateolabrax_maculatus_GLEAN_10004812,Lateolabrax_maculatus_GLEAN_10004946,Lateolabrax_maculatus_GLEAN_10005858,Lateolabrax_maculatus_GLEAN_10007609,Lateolabrax_maculatus_GLEAN_10009641,Lateolabrax_maculatus_GLEAN_10010363,Lateolabrax_maculatus_GLEAN_1…
GO:0009628	response to abiotic stimulus	BP	0.0154277	0.235526	7	755	47	13395	Over	3	Lateolabrax_maculatus_GLEAN_10003273,Lateolabrax_maculatus_GLEAN_10004812,Lateolabrax_maculatus_GLEAN_10004946,Lateolabrax_maculatus_GLEAN_10007609,Lateolabrax_maculatus_GLEAN_10012420,Lateolabrax_maculatus_GLEAN_10018338,Lateolabrax_maculatus_GLEAN_10019282
GO:0051775	response to redox state	BP	0.0174238	0.235526	1	5	47	13395	Over	3	Lateolabrax_maculatus_GLEAN_10004812
GO:0042562	hormone binding	MF	0.0243098	0.251295	1	7	47	13395	Over	3	Lateolabrax_maculatus_GLEAN_10005858
GO:0031012	extracellular matrix	CC	0.0244018	0.251295	3	178	47	13395	Over	3	Lateolabrax_maculatus_GLEAN_10000953,Lateolabrax_maculatus_GLEAN_10017828,Lateolabrax_maculatus_GLEAN_10020950
GO:0022857	transmembrane transporter activity	MF	0.0311723	0.284915	6	683	47	13395	Over	3	Lateolabrax_maculatus_GLEAN_10004946,Lateolabrax_maculatus_GLEAN_10007205,Lateolabrax_maculatus_GLEAN_10012420,Lateolabrax_maculatus_GLEAN_10014857,Lateolabrax_maculatus_GLEAN_10018338,Lateolabrax_maculatus_GLEAN_10018647
GO:0009653	anatomical structure morphogenesis	BP	0.0466137	0.317436	15	2598	47	13395	Over	3	Lateolabrax_maculatus_GLEAN_10000953,Lateolabrax_maculatus_GLEAN_10001506,Lateolabrax_maculatus_GLEAN_10004807,Lateolabrax_maculatus_GLEAN_10007609,Lateolabrax_maculatus_GLEAN_10009641,Lateolabrax_maculatus_GLEAN_10009775,Lateolabrax_maculatus_GLEAN_10012420,Lateolabrax_maculatus_GLEAN_10013338,Lateolabrax_maculatus_GLEAN_10013650,Lateolabrax_maculatus_GLEAN_10014535,Lateolabrax_maculatus_GLEAN_1…
GO:0043256	laminin complex	CC	0.0480408	0.317436	1	14	47	13395	Over	3	Lateolabrax_maculatus_GLEAN_10000953
GO:0045104	intermediate filament cytoskeleton organization	BP	5.15133e-05	0.0311935	3	21	47	13395	Over	4	Lateolabrax_maculatus_GLEAN_10007609,Lateolabrax_maculatus_GLEAN_10016265,Lateolabrax_maculatus_GLEAN_10019146
GO:0009888	tissue development	BP	0.00149398	0.120704	13	1570	47	13395	Over	4	Lateolabrax_maculatus_GLEAN_10000953,Lateolabrax_maculatus_GLEAN_10003587,Lateolabrax_maculatus_GLEAN_10004807,Lateolabrax_maculatus_GLEAN_10004812,Lateolabrax_maculatus_GLEAN_10007609,Lateolabrax_maculatus_GLEAN_10009555,Lateolabrax_maculatus_GLEAN_10009641,Lateolabrax_maculatus_GLEAN_10010363,Lateolabrax_maculatus_GLEAN_10012420,Lateolabrax_maculatus_GLEAN_10013338,Lateolabrax_maculatus_GLEAN_1…
GO:0009268	response to pH	BP	0.00290882	0.152715	2	23	47	13395	Over	4	Lateolabrax_maculatus_GLEAN_10004946,Lateolabrax_maculatus_GLEAN_10018338
GO:0031099	regeneration	BP	0.00442821	0.168641	4	191	47	13395	Over	4	Lateolabrax_maculatus_GLEAN_10007609,Lateolabrax_maculatus_GLEAN_10013338,Lateolabrax_maculatus_GLEAN_10016265,Lateolabrax_maculatus_GLEAN_10019146
GO:0006897	endocytosis	BP	0.00463461	0.169441	5	313	47	13395	Over	4	Lateolabrax_maculatus_GLEAN_10000774,Lateolabrax_maculatus_GLEAN_10003273,Lateolabrax_maculatus_GLEAN_10005858,Lateolabrax_maculatus_GLEAN_10018419,Lateolabrax_maculatus_GLEAN_10022340
GO:0022804	active transmembrane transporter activity	MF	0.0068215	0.190071	4	216	47	13395	Over	4	Lateolabrax_maculatus_GLEAN_10007205,Lateolabrax_maculatus_GLEAN_10012420,Lateolabrax_maculatus_GLEAN_10014857,Lateolabrax_maculatus_GLEAN_10018647
GO:0070997	neuron death	BP	0.00742202	0.190071	2	37	47	13395	Over	4	Lateolabrax_maculatus_GLEAN_10004755,Lateolabrax_maculatus_GLEAN_10019282
GO:0048731	system development	BP	0.00748637	0.190071	21	3542	47	13395	Over	4	Lateolabrax_maculatus_GLEAN_10000953,Lateolabrax_maculatus_GLEAN_10001506,Lateolabrax_maculatus_GLEAN_10003926,Lateolabrax_maculatus_GLEAN_10004807,Lateolabrax_maculatus_GLEAN_10004812,Lateolabrax_maculatus_GLEAN_10004946,Lateolabrax_maculatus_GLEAN_10005858,Lateolabrax_maculatus_GLEAN_10007609,Lateolabrax_maculatus_GLEAN_10009641,Lateolabrax_maculatus_GLEAN_10010363,Lateolabrax_maculatus_GLEAN_1…
GO:0015318	inorganic molecular entity transmembrane transporter activity	MF	0.00891938	0.213068	6	516	47	13395	Over	4	Lateolabrax_maculatus_GLEAN_10004946,Lateolabrax_maculatus_GLEAN_10007205,Lateolabrax_maculatus_GLEAN_10012420,Lateolabrax_maculatus_GLEAN_10014857,Lateolabrax_maculatus_GLEAN_10018338,Lateolabrax_maculatus_GLEAN_10018647
GO:0005598	short-chain collagen trimer	CC	0.0104902	0.213068	1	3	47	13395	Over	4	Lateolabrax_maculatus_GLEAN_10013650
GO:0017046	peptide hormone binding	MF	0.0104902	0.213068	1	3	47	13395	Over	4	Lateolabrax_maculatus_GLEAN_10005858
GO:0090066	regulation of anatomical structure size	BP	0.0130351	0.228597	4	261	47	13395	Over	4	Lateolabrax_maculatus_GLEAN_10007205,Lateolabrax_maculatus_GLEAN_10012420,Lateolabrax_maculatus_GLEAN_10018647,Lateolabrax_maculatus_GLEAN_10019146
GO:0015075	ion transmembrane transporter activity	MF	0.0146707	0.235246	6	575	47	13395	Over	4	Lateolabrax_maculatus_GLEAN_10004946,Lateolabrax_maculatus_GLEAN_10007205,Lateolabrax_maculatus_GLEAN_10012420,Lateolabrax_maculatus_GLEAN_10014857,Lateolabrax_maculatus_GLEAN_10018338,Lateolabrax_maculatus_GLEAN_10018647
GO:0060560	developmental growth involved in morphogenesis	BP	0.017577	0.235526	3	157	47	13395	Over	4	Lateolabrax_maculatus_GLEAN_10004807,Lateolabrax_maculatus_GLEAN_10009641,Lateolabrax_maculatus_GLEAN_10012420
GO:0032411	positive regulation of transporter activity	BP	0.0199368	0.235526	2	62	47	13395	Over	4	Lateolabrax_maculatus_GLEAN_10004946,Lateolabrax_maculatus_GLEAN_10007205
GO:0045109	intermediate filament organization	BP	0.000179143	0.0409342	2	6	47	13395	Over	5	Lateolabrax_maculatus_GLEAN_10016265,Lateolabrax_maculatus_GLEAN_10019146
GO:0033334	fin morphogenesis	BP	0.00158473	0.120704	2	17	47	13395	Over	5	Lateolabrax_maculatus_GLEAN_10000953,Lateolabrax_maculatus_GLEAN_10013338
GO:0097644	calcitonin family binding	MF	0.00350877	0.152715	1	1	47	13395	Over	5	Lateolabrax_maculatus_GLEAN_10005858
GO:0031102	neuron projection regeneration	BP	0.00558938	0.189211	2	32	47	13395	Over	5	Lateolabrax_maculatus_GLEAN_10016265,Lateolabrax_maculatus_GLEAN_10019146
GO:0014010	Schwann cell proliferation	BP	0.0104902	0.213068	1	3	47	13395	Over	5	Lateolabrax_maculatus_GLEAN_10007609
GO:0060251	regulation of glial cell proliferation	BP	0.0104902	0.213068	1	3	47	13395	Over	5	Lateolabrax_maculatus_GLEAN_10007609
GO:0015399	primary active transmembrane transporter activity	MF	0.0137738	0.228597	2	51	47	13395	Over	5	Lateolabrax_maculatus_GLEAN_10007205,Lateolabrax_maculatus_GLEAN_10018647
GO:0072044	collecting duct development	BP	0.0139629	0.228597	1	4	47	13395	Over	5	Lateolabrax_maculatus_GLEAN_10001506
GO:1903793	positive regulation of anion transport	BP	0.0139629	0.228597	1	4	47	13395	Over	5	Lateolabrax_maculatus_GLEAN_10007205
GO:0032414	positive regulation of ion transmembrane transporter activity	BP	0.0159008	0.235526	2	55	47	13395	Over	5	Lateolabrax_maculatus_GLEAN_10004946,Lateolabrax_maculatus_GLEAN_10007205
GO:0098656	anion transmembrane transport	BP	0.0187438	0.235526	2	60	47	13395	Over	5	Lateolabrax_maculatus_GLEAN_10007205,Lateolabrax_maculatus_GLEAN_10014857
GO:0033333	fin development	BP	0.0193364	0.235526	2	61	47	13395	Over	5	Lateolabrax_maculatus_GLEAN_10000953,Lateolabrax_maculatus_GLEAN_10013338
GO:0043062	extracellular structure organization	BP	0.0204523	0.235526	4	299	47	13395	Over	5	Lateolabrax_maculatus_GLEAN_10007609,Lateolabrax_maculatus_GLEAN_10013338,Lateolabrax_maculatus_GLEAN_10013650,Lateolabrax_maculatus_GLEAN_10020950
GO:0050905	neuromuscular process	BP	0.0205449	0.235526	2	63	47	13395	Over	5	Lateolabrax_maculatus_GLEAN_10018647,Lateolabrax_maculatus_GLEAN_10019146
GO:0001976	nervous system process involved in regulation of systemic arterial blood pressure	BP	0.0208727	0.235526	1	6	47	13395	Over	5	Lateolabrax_maculatus_GLEAN_10004946

## Sheet: 0-24 down
GO_ID	GO_Term	GO_Class	Pvalue	AdjustedPv	x1	x2	n	N	EnrichDirect	GOlevl	GeneID
GO:0051707	response to other organism	BP	7.77562e-05	0.00554355	9	529	47	13395	Over	3	Lateolabrax_maculatus_GLEAN_10002150,Lateolabrax_maculatus_GLEAN_10002895,Lateolabrax_maculatus_GLEAN_10007551,Lateolabrax_maculatus_GLEAN_10010144,Lateolabrax_maculatus_GLEAN_10011357,Lateolabrax_maculatus_GLEAN_10011823,Lateolabrax_maculatus_GLEAN_10015881,Lateolabrax_maculatus_GLEAN_10018186,Lateolabrax_maculatus_GLEAN_10022636
GO:0009607	response to biotic stimulus	BP	0.000100484	0.00583987	9	547	47	13395	Over	3	Lateolabrax_maculatus_GLEAN_10002150,Lateolabrax_maculatus_GLEAN_10002895,Lateolabrax_maculatus_GLEAN_10007551,Lateolabrax_maculatus_GLEAN_10010144,Lateolabrax_maculatus_GLEAN_10011357,Lateolabrax_maculatus_GLEAN_10011823,Lateolabrax_maculatus_GLEAN_10015881,Lateolabrax_maculatus_GLEAN_10018186,Lateolabrax_maculatus_GLEAN_10022636
GO:0030029	actin filament-based process	BP	0.000128572	0.00640668	9	565	47	13395	Over	3	Lateolabrax_maculatus_GLEAN_10003123,Lateolabrax_maculatus_GLEAN_10007018,Lateolabrax_maculatus_GLEAN_10007551,Lateolabrax_maculatus_GLEAN_10011357,Lateolabrax_maculatus_GLEAN_10014793,Lateolabrax_maculatus_GLEAN_10014804,Lateolabrax_maculatus_GLEAN_10016321,Lateolabrax_maculatus_GLEAN_10016494,Lateolabrax_maculatus_GLEAN_10019047
GO:0099080	supramolecular complex	CC	0.00012969	0.00640668	8	440	47	13395	Over	3	Lateolabrax_maculatus_GLEAN_10002007,Lateolabrax_maculatus_GLEAN_10002150,Lateolabrax_maculatus_GLEAN_10002934,Lateolabrax_maculatus_GLEAN_10005469,Lateolabrax_maculatus_GLEAN_10007551,Lateolabrax_maculatus_GLEAN_10011357,Lateolabrax_maculatus_GLEAN_10011823,Lateolabrax_maculatus_GLEAN_10014793
GO:0003008	system process	BP	0.00339294	0.0679104	12	1484	47	13395	Over	3	Lateolabrax_maculatus_GLEAN_10000759,Lateolabrax_maculatus_GLEAN_10001842,Lateolabrax_maculatus_GLEAN_10002007,Lateolabrax_maculatus_GLEAN_10003123,Lateolabrax_maculatus_GLEAN_10007018,Lateolabrax_maculatus_GLEAN_10007551,Lateolabrax_maculatus_GLEAN_10011357,Lateolabrax_maculatus_GLEAN_10014793,Lateolabrax_maculatus_GLEAN_10014804,Lateolabrax_maculatus_GLEAN_10016321,Lateolabrax_maculatus_GLEAN_1…
GO:0048856	anatomical structure development	BP	0.00434496	0.071547	26	4623	47	13395	Over	3	Lateolabrax_maculatus_GLEAN_10001842,Lateolabrax_maculatus_GLEAN_10002150,Lateolabrax_maculatus_GLEAN_10002934,Lateolabrax_maculatus_GLEAN_10003123,Lateolabrax_maculatus_GLEAN_10007018,Lateolabrax_maculatus_GLEAN_10007551,Lateolabrax_maculatus_GLEAN_10009099,Lateolabrax_maculatus_GLEAN_10010144,Lateolabrax_maculatus_GLEAN_10010444,Lateolabrax_maculatus_GLEAN_10011357,Lateolabrax_maculatus_GLEAN_1…
GO:0050879	multicellular organismal movement	BP	0.00822118	0.1083	2	39	47	13395	Over	3	Lateolabrax_maculatus_GLEAN_10001842,Lateolabrax_maculatus_GLEAN_10002007
GO:0009719	response to endogenous stimulus	BP	0.00850122	0.110516	9	1027	47	13395	Over	3	Lateolabrax_maculatus_GLEAN_10001842,Lateolabrax_maculatus_GLEAN_10002007,Lateolabrax_maculatus_GLEAN_10005469,Lateolabrax_maculatus_GLEAN_10007551,Lateolabrax_maculatus_GLEAN_10010144,Lateolabrax_maculatus_GLEAN_10012641,Lateolabrax_maculatus_GLEAN_10013228,Lateolabrax_maculatus_GLEAN_10015902,Lateolabrax_maculatus_GLEAN_10016017
GO:0031672	A band	CC	0.0104902	0.131194	1	3	47	13395	Over	3	Lateolabrax_maculatus_GLEAN_10002007
GO:0030017	sarcomere	CC	0.0117508	0.141583	3	135	47	13395	Over	3	Lateolabrax_maculatus_GLEAN_10002007,Lateolabrax_maculatus_GLEAN_10007551,Lateolabrax_maculatus_GLEAN_10014793
GO:0051239	regulation of multicellular organismal process	BP	0.0125225	0.145556	12	1669	47	13395	Over	3	Lateolabrax_maculatus_GLEAN_10002007,Lateolabrax_maculatus_GLEAN_10002895,Lateolabrax_maculatus_GLEAN_10003123,Lateolabrax_maculatus_GLEAN_10009099,Lateolabrax_maculatus_GLEAN_10010144,Lateolabrax_maculatus_GLEAN_10011823,Lateolabrax_maculatus_GLEAN_10014793,Lateolabrax_maculatus_GLEAN_10015881,Lateolabrax_maculatus_GLEAN_10016155,Lateolabrax_maculatus_GLEAN_10016321,Lateolabrax_maculatus_GLEAN_1…
GO:0042221	response to chemical	BP	0.0128468	0.147588	17	2744	47	13395	Over	3	Lateolabrax_maculatus_GLEAN_10001842,Lateolabrax_maculatus_GLEAN_10002007,Lateolabrax_maculatus_GLEAN_10002150,Lateolabrax_maculatus_GLEAN_10002895,Lateolabrax_maculatus_GLEAN_10003966,Lateolabrax_maculatus_GLEAN_10005469,Lateolabrax_maculatus_GLEAN_10007551,Lateolabrax_maculatus_GLEAN_10010144,Lateolabrax_maculatus_GLEAN_10011357,Lateolabrax_maculatus_GLEAN_10011823,Lateolabrax_maculatus_GLEAN_1…
GO:0016459	myosin complex	CC	0.013263	0.148338	2	50	47	13395	Over	3	Lateolabrax_maculatus_GLEAN_10007018,Lateolabrax_maculatus_GLEAN_10014804
GO:0007275	multicellular organism development	BP	0.013294	0.148338	22	3929	47	13395	Over	3	Lateolabrax_maculatus_GLEAN_10001842,Lateolabrax_maculatus_GLEAN_10002150,Lateolabrax_maculatus_GLEAN_10002934,Lateolabrax_maculatus_GLEAN_10007018,Lateolabrax_maculatus_GLEAN_10007551,Lateolabrax_maculatus_GLEAN_10009099,Lateolabrax_maculatus_GLEAN_10010144,Lateolabrax_maculatus_GLEAN_10010444,Lateolabrax_maculatus_GLEAN_10011357,Lateolabrax_maculatus_GLEAN_10011433,Lateolabrax_maculatus_GLEAN_1…
GO:0016853	isomerase activity	MF	0.0270418	0.219218	2	73	47	13395	Over	3	Lateolabrax_maculatus_GLEAN_10016502,Lateolabrax_maculatus_GLEAN_10017138
GO:0003012	muscle system process	BP	1.31054e-07	4.31604e-05	11	412	47	13395	Over	4	Lateolabrax_maculatus_GLEAN_10001842,Lateolabrax_maculatus_GLEAN_10002007,Lateolabrax_maculatus_GLEAN_10003123,Lateolabrax_maculatus_GLEAN_10007018,Lateolabrax_maculatus_GLEAN_10007551,Lateolabrax_maculatus_GLEAN_10011357,Lateolabrax_maculatus_GLEAN_10014793,Lateolabrax_maculatus_GLEAN_10014804,Lateolabrax_maculatus_GLEAN_10016321,Lateolabrax_maculatus_GLEAN_10016494,Lateolabrax_maculatus_GLEAN_1…
GO:0030048	actin filament-based movement	BP	2.3019e-06	0.000379046	6	111	47	13395	Over	4	Lateolabrax_maculatus_GLEAN_10011357,Lateolabrax_maculatus_GLEAN_10014793,Lateolabrax_maculatus_GLEAN_10014804,Lateolabrax_maculatus_GLEAN_10016321,Lateolabrax_maculatus_GLEAN_10016494,Lateolabrax_maculatus_GLEAN_10019047
GO:0043207	response to external biotic stimulus	BP	8.97741e-05	0.00554355	9	539	47	13395	Over	4	Lateolabrax_maculatus_GLEAN_10002150,Lateolabrax_maculatus_GLEAN_10002895,Lateolabrax_maculatus_GLEAN_10007551,Lateolabrax_maculatus_GLEAN_10010144,Lateolabrax_maculatus_GLEAN_10011357,Lateolabrax_maculatus_GLEAN_10011823,Lateolabrax_maculatus_GLEAN_10015881,Lateolabrax_maculatus_GLEAN_10018186,Lateolabrax_maculatus_GLEAN_10022636
GO:0009617	response to bacterium	BP	0.000375453	0.0138647	6	275	47	13395	Over	4	Lateolabrax_maculatus_GLEAN_10002150,Lateolabrax_maculatus_GLEAN_10002895,Lateolabrax_maculatus_GLEAN_10007551,Lateolabrax_maculatus_GLEAN_10010144,Lateolabrax_maculatus_GLEAN_10011823,Lateolabrax_maculatus_GLEAN_10015881
GO:0061061	muscle structure development	BP	0.000500392	0.015948	8	537	47	13395	Over	4	Lateolabrax_maculatus_GLEAN_10007018,Lateolabrax_maculatus_GLEAN_10010144,Lateolabrax_maculatus_GLEAN_10011357,Lateolabrax_maculatus_GLEAN_10014793,Lateolabrax_maculatus_GLEAN_10015902,Lateolabrax_maculatus_GLEAN_10016321,Lateolabrax_maculatus_GLEAN_10016494,Lateolabrax_maculatus_GLEAN_10019047
GO:0010927	cellular component assembly involved in morphogenesis	BP	0.000540572	0.0166902	5	192	47	13395	Over	4	Lateolabrax_maculatus_GLEAN_10003123,Lateolabrax_maculatus_GLEAN_10007018,Lateolabrax_maculatus_GLEAN_10011357,Lateolabrax_maculatus_GLEAN_10014297,Lateolabrax_maculatus_GLEAN_10019047
GO:0006066	alcohol metabolic process	BP	0.00151616	0.0394201	4	142	47	13395	Over	4	Lateolabrax_maculatus_GLEAN_10004070,Lateolabrax_maculatus_GLEAN_10016502,Lateolabrax_maculatus_GLEAN_10017138,Lateolabrax_maculatus_GLEAN_10018186
GO:0044057	regulation of system process	BP	0.00244504	0.0536821	6	395	47	13395	Over	4	Lateolabrax_maculatus_GLEAN_10002007,Lateolabrax_maculatus_GLEAN_10003123,Lateolabrax_maculatus_GLEAN_10014793,Lateolabrax_maculatus_GLEAN_10016321,Lateolabrax_maculatus_GLEAN_10016494,Lateolabrax_maculatus_GLEAN_10019047
GO:0004540	ribonuclease activity	MF	0.00290882	0.0624765	2	23	47	13395	Over	4	Lateolabrax_maculatus_GLEAN_10005469,Lateolabrax_maculatus_GLEAN_10011823
GO:0009725	response to hormone	BP	0.00326791	0.0679104	8	720	47	13395	Over	4	Lateolabrax_maculatus_GLEAN_10002007,Lateolabrax_maculatus_GLEAN_10005469,Lateolabrax_maculatus_GLEAN_10007551,Lateolabrax_maculatus_GLEAN_10010144,Lateolabrax_maculatus_GLEAN_10012641,Lateolabrax_maculatus_GLEAN_10013228,Lateolabrax_maculatus_GLEAN_10015902,Lateolabrax_maculatus_GLEAN_10016017
GO:1901615	organic hydroxy compound metabolic process	BP	0.0033017	0.0679104	5	289	47	13395	Over	4	Lateolabrax_maculatus_GLEAN_10004070,Lateolabrax_maculatus_GLEAN_10015881,Lateolabrax_maculatus_GLEAN_10016502,Lateolabrax_maculatus_GLEAN_10017138,Lateolabrax_maculatus_GLEAN_10018186
GO:0099081	supramolecular polymer	CC	0.00360483	0.0679104	5	295	47	13395	Over	4	Lateolabrax_maculatus_GLEAN_10002007,Lateolabrax_maculatus_GLEAN_10002150,Lateolabrax_maculatus_GLEAN_10007551,Lateolabrax_maculatus_GLEAN_10011357,Lateolabrax_maculatus_GLEAN_10014793
GO:0048729	tissue morphogenesis	BP	0.00369234	0.0679104	7	576	47	13395	Over	4	Lateolabrax_maculatus_GLEAN_10007018,Lateolabrax_maculatus_GLEAN_10011357,Lateolabrax_maculatus_GLEAN_10011433,Lateolabrax_maculatus_GLEAN_10016321,Lateolabrax_maculatus_GLEAN_10016494,Lateolabrax_maculatus_GLEAN_10019047,Lateolabrax_maculatus_GLEAN_10022636
GO:0043232	intracellular non-membrane-bounded organelle	CC	0.0039922	0.0699711	16	2300	47	13395	Over	4	Lateolabrax_maculatus_GLEAN_10002007,Lateolabrax_maculatus_GLEAN_10002150,Lateolabrax_maculatus_GLEAN_10002934,Lateolabrax_maculatus_GLEAN_10005469,Lateolabrax_maculatus_GLEAN_10007018,Lateolabrax_maculatus_GLEAN_10007551,Lateolabrax_maculatus_GLEAN_10010444,Lateolabrax_maculatus_GLEAN_10011357,Lateolabrax_maculatus_GLEAN_10011823,Lateolabrax_maculatus_GLEAN_10014793,Lateolabrax_maculatus_GLEAN_1…
GO:0043228	non-membrane-bounded organelle	CC	0.0039922	0.0699711	16	2300	47	13395	Over	4	Lateolabrax_maculatus_GLEAN_10002007,Lateolabrax_maculatus_GLEAN_10002150,Lateolabrax_maculatus_GLEAN_10002934,Lateolabrax_maculatus_GLEAN_10005469,Lateolabrax_maculatus_GLEAN_10007018,Lateolabrax_maculatus_GLEAN_10007551,Lateolabrax_maculatus_GLEAN_10010444,Lateolabrax_maculatus_GLEAN_10011357,Lateolabrax_maculatus_GLEAN_10011823,Lateolabrax_maculatus_GLEAN_10014793,Lateolabrax_maculatus_GLEAN_1…
GO:0006936	muscle contraction	BP	2.4292e-08	2.40005e-05	10	269	47	13395	Over	5	Lateolabrax_maculatus_GLEAN_10001842,Lateolabrax_maculatus_GLEAN_10002007,Lateolabrax_maculatus_GLEAN_10003123,Lateolabrax_maculatus_GLEAN_10007018,Lateolabrax_maculatus_GLEAN_10007551,Lateolabrax_maculatus_GLEAN_10011357,Lateolabrax_maculatus_GLEAN_10014804,Lateolabrax_maculatus_GLEAN_10016321,Lateolabrax_maculatus_GLEAN_10016494,Lateolabrax_maculatus_GLEAN_10019047
GO:0070252	actin-mediated cell contraction	BP	1.32276e-06	0.000286676	6	101	47	13395	Over	5	Lateolabrax_maculatus_GLEAN_10011357,Lateolabrax_maculatus_GLEAN_10014793,Lateolabrax_maculatus_GLEAN_10014804,Lateolabrax_maculatus_GLEAN_10016321,Lateolabrax_maculatus_GLEAN_10016494,Lateolabrax_maculatus_GLEAN_10019047
GO:0007517	muscle organ development	BP	3.21752e-06	0.00045413	8	263	47	13395	Over	5	Lateolabrax_maculatus_GLEAN_10007018,Lateolabrax_maculatus_GLEAN_10010144,Lateolabrax_maculatus_GLEAN_10011357,Lateolabrax_maculatus_GLEAN_10014793,Lateolabrax_maculatus_GLEAN_10015902,Lateolabrax_maculatus_GLEAN_10016321,Lateolabrax_maculatus_GLEAN_10016494,Lateolabrax_maculatus_GLEAN_10019047
GO:1902652	secondary alcohol metabolic process	BP	8.07138e-06	0.000886058	4	37	47	13395	Over	5	Lateolabrax_maculatus_GLEAN_10004070,Lateolabrax_maculatus_GLEAN_10016502,Lateolabrax_maculatus_GLEAN_10017138,Lateolabrax_maculatus_GLEAN_10018186
GO:0016125	sterol metabolic process	BP	1.34685e-05	0.00133069	5	88	47	13395	Over	5	Lateolabrax_maculatus_GLEAN_10004070,Lateolabrax_maculatus_GLEAN_10015881,Lateolabrax_maculatus_GLEAN_10016502,Lateolabrax_maculatus_GLEAN_10017138,Lateolabrax_maculatus_GLEAN_10018186
GO:0060415	muscle tissue morphogenesis	BP	6.26966e-05	0.00516202	5	121	47	13395	Over	5	Lateolabrax_maculatus_GLEAN_10007018,Lateolabrax_maculatus_GLEAN_10011357,Lateolabrax_maculatus_GLEAN_10016321,Lateolabrax_maculatus_GLEAN_10016494,Lateolabrax_maculatus_GLEAN_10019047
GO:0048644	muscle organ morphogenesis	BP	7.89342e-05	0.00554355	5	127	47	13395	Over	5	Lateolabrax_maculatus_GLEAN_10007018,Lateolabrax_maculatus_GLEAN_10011357,Lateolabrax_maculatus_GLEAN_10016321,Lateolabrax_maculatus_GLEAN_10016494,Lateolabrax_maculatus_GLEAN_10019047
GO:0002237	response to molecule of bacterial origin	BP	8.45814e-05	0.00554355	6	209	47	13395	Over	5	Lateolabrax_maculatus_GLEAN_10002150,Lateolabrax_maculatus_GLEAN_10002895,Lateolabrax_maculatus_GLEAN_10007551,Lateolabrax_maculatus_GLEAN_10010144,Lateolabrax_maculatus_GLEAN_10011823,Lateolabrax_maculatus_GLEAN_10015881
GO:0060537	muscle tissue development	BP	0.00014461	0.00680358	7	332	47	13395	Over	5	Lateolabrax_maculatus_GLEAN_10007018,Lateolabrax_maculatus_GLEAN_10010144,Lateolabrax_maculatus_GLEAN_10014804,Lateolabrax_maculatus_GLEAN_10015902,Lateolabrax_maculatus_GLEAN_10016321,Lateolabrax_maculatus_GLEAN_10016494,Lateolabrax_maculatus_GLEAN_10019047
GO:0004532	exoribonuclease activity	MF	0.000250239	0.00988944	2	7	47	13395	Over	5	Lateolabrax_maculatus_GLEAN_10005469,Lateolabrax_maculatus_GLEAN_10011823
GO:0006599	phosphagen metabolic process	BP	0.000427064	0.0145496	2	9	47	13395	Over	5	Lateolabrax_maculatus_GLEAN_10009431,Lateolabrax_maculatus_GLEAN_10015611
GO:0090257	regulation of muscle system process	BP	0.000621685	0.0183357	5	198	47	13395	Over	5	Lateolabrax_maculatus_GLEAN_10002007,Lateolabrax_maculatus_GLEAN_10003123,Lateolabrax_maculatus_GLEAN_10016321,Lateolabrax_maculatus_GLEAN_10016494,Lateolabrax_maculatus_GLEAN_10019047
GO:0031032	actomyosin structure organization	BP	0.000945272	0.0259425	4	125	47	13395	Over	5	Lateolabrax_maculatus_GLEAN_10003123,Lateolabrax_maculatus_GLEAN_10007018,Lateolabrax_maculatus_GLEAN_10011357,Lateolabrax_maculatus_GLEAN_10019047
GO:0030239	myofibril assembly	BP	0.0016572	0.0418452	3	67	47	13395	Over	5	Lateolabrax_maculatus_GLEAN_10007018,Lateolabrax_maculatus_GLEAN_10011357,Lateolabrax_maculatus_GLEAN_10019047
GO:0008202	steroid metabolic process	BP	0.00176071	0.0418452	5	250	47	13395	Over	5	Lateolabrax_maculatus_GLEAN_10004070,Lateolabrax_maculatus_GLEAN_10015881,Lateolabrax_maculatus_GLEAN_10016502,Lateolabrax_maculatus_GLEAN_10017138,Lateolabrax_maculatus_GLEAN_10018186

## Sheet: 0-72 up
GO_ID	GO_Term	GO_Class	Pvalue	AdjustedPv	x1	x2	n	N	EnrichDirect	GOlevl	GeneID
GO:0005576	extracellular region	CC	5.80248e-18	8.16409e-15	31	266	376	13395	Over	3	Lateolabrax_maculatus_GLEAN_10000905,Lateolabrax_maculatus_GLEAN_10000953,Lateolabrax_maculatus_GLEAN_10002687,Lateolabrax_maculatus_GLEAN_10002879,Lateolabrax_maculatus_GLEAN_10003248,Lateolabrax_maculatus_GLEAN_10003304,Lateolabrax_maculatus_GLEAN_10003760,Lateolabrax_maculatus_GLEAN_10004409,Lateolabrax_maculatus_GLEAN_10005217,Lateolabrax_maculatus_GLEAN_10005364,Lateolabrax_maculatus_GLEAN_1…
GO:0009653	anatomical structure morphogenesis	BP	4.07204e-17	3.81957e-14	137	2598	376	13395	Over	3	Lateolabrax_maculatus_GLEAN_10000899,Lateolabrax_maculatus_GLEAN_10000905,Lateolabrax_maculatus_GLEAN_10000953,Lateolabrax_maculatus_GLEAN_10000963,Lateolabrax_maculatus_GLEAN_10001279,Lateolabrax_maculatus_GLEAN_10001452,Lateolabrax_maculatus_GLEAN_10001481,Lateolabrax_maculatus_GLEAN_10001751,Lateolabrax_maculatus_GLEAN_10001982,Lateolabrax_maculatus_GLEAN_10001989,Lateolabrax_maculatus_GLEAN_1…
GO:0048856	anatomical structure development	BP	1.21601e-15	6.84369e-13	203	4623	376	13395	Over	3	Lateolabrax_maculatus_GLEAN_10000154,Lateolabrax_maculatus_GLEAN_10000500,Lateolabrax_maculatus_GLEAN_10000824,Lateolabrax_maculatus_GLEAN_10000899,Lateolabrax_maculatus_GLEAN_10000905,Lateolabrax_maculatus_GLEAN_10000953,Lateolabrax_maculatus_GLEAN_10000963,Lateolabrax_maculatus_GLEAN_10001083,Lateolabrax_maculatus_GLEAN_10001203,Lateolabrax_maculatus_GLEAN_10001279,Lateolabrax_maculatus_GLEAN_1…
GO:0007275	multicellular organism development	BP	1.60961e-13	5.66182e-11	175	3929	376	13395	Over	3	Lateolabrax_maculatus_GLEAN_10000154,Lateolabrax_maculatus_GLEAN_10000500,Lateolabrax_maculatus_GLEAN_10000824,Lateolabrax_maculatus_GLEAN_10000899,Lateolabrax_maculatus_GLEAN_10000905,Lateolabrax_maculatus_GLEAN_10000953,Lateolabrax_maculatus_GLEAN_10001083,Lateolabrax_maculatus_GLEAN_10001452,Lateolabrax_maculatus_GLEAN_10001481,Lateolabrax_maculatus_GLEAN_10001751,Lateolabrax_maculatus_GLEAN_1…
GO:0031012	extracellular matrix	CC	4.59707e-12	1.27074e-09	26	178	376	13395	Over	3	Lateolabrax_maculatus_GLEAN_10000905,Lateolabrax_maculatus_GLEAN_10000953,Lateolabrax_maculatus_GLEAN_10002879,Lateolabrax_maculatus_GLEAN_10003304,Lateolabrax_maculatus_GLEAN_10003760,Lateolabrax_maculatus_GLEAN_10005217,Lateolabrax_maculatus_GLEAN_10005954,Lateolabrax_maculatus_GLEAN_10007319,Lateolabrax_maculatus_GLEAN_10007862,Lateolabrax_maculatus_GLEAN_10007863,Lateolabrax_maculatus_GLEAN_1…
GO:0007155	cell adhesion	BP	4.96735e-12	1.27074e-09	45	607	376	13395	Over	3	Lateolabrax_maculatus_GLEAN_10001739,Lateolabrax_maculatus_GLEAN_10001982,Lateolabrax_maculatus_GLEAN_10002177,Lateolabrax_maculatus_GLEAN_10003304,Lateolabrax_maculatus_GLEAN_10003760,Lateolabrax_maculatus_GLEAN_10003924,Lateolabrax_maculatus_GLEAN_10003926,Lateolabrax_maculatus_GLEAN_10005643,Lateolabrax_maculatus_GLEAN_10006571,Lateolabrax_maculatus_GLEAN_10006572,Lateolabrax_maculatus_GLEAN_1…
GO:0006928	movement of cell or subcellular component	BP	6.13733e-10	8.54401e-08	83	1580	376	13395	Over	3	Lateolabrax_maculatus_GLEAN_10000905,Lateolabrax_maculatus_GLEAN_10000953,Lateolabrax_maculatus_GLEAN_10000963,Lateolabrax_maculatus_GLEAN_10001452,Lateolabrax_maculatus_GLEAN_10001892,Lateolabrax_maculatus_GLEAN_10002023,Lateolabrax_maculatus_GLEAN_10002189,Lateolabrax_maculatus_GLEAN_10002532,Lateolabrax_maculatus_GLEAN_10002687,Lateolabrax_maculatus_GLEAN_10002879,Lateolabrax_maculatus_GLEAN_1…
GO:0042330	taxis	BP	7.09709e-10	8.68314e-08	42	606	376	13395	Over	3	Lateolabrax_maculatus_GLEAN_10000905,Lateolabrax_maculatus_GLEAN_10001452,Lateolabrax_maculatus_GLEAN_10002532,Lateolabrax_maculatus_GLEAN_10002687,Lateolabrax_maculatus_GLEAN_10003455,Lateolabrax_maculatus_GLEAN_10003893,Lateolabrax_maculatus_GLEAN_10003916,Lateolabrax_maculatus_GLEAN_10004371,Lateolabrax_maculatus_GLEAN_10004409,Lateolabrax_maculatus_GLEAN_10004926,Lateolabrax_maculatus_GLEAN_1…
GO:0048870	cell motility	BP	3.57376e-09	2.87331e-07	65	1165	376	13395	Over	3	Lateolabrax_maculatus_GLEAN_10000905,Lateolabrax_maculatus_GLEAN_10000953,Lateolabrax_maculatus_GLEAN_10000963,Lateolabrax_maculatus_GLEAN_10001892,Lateolabrax_maculatus_GLEAN_10002023,Lateolabrax_maculatus_GLEAN_10002189,Lateolabrax_maculatus_GLEAN_10002532,Lateolabrax_maculatus_GLEAN_10002879,Lateolabrax_maculatus_GLEAN_10003304,Lateolabrax_maculatus_GLEAN_10003893,Lateolabrax_maculatus_GLEAN_1…
GO:0051674	localization of cell	BP	3.57376e-09	2.87331e-07	65	1165	376	13395	Over	3	Lateolabrax_maculatus_GLEAN_10000905,Lateolabrax_maculatus_GLEAN_10000953,Lateolabrax_maculatus_GLEAN_10000963,Lateolabrax_maculatus_GLEAN_10001892,Lateolabrax_maculatus_GLEAN_10002023,Lateolabrax_maculatus_GLEAN_10002189,Lateolabrax_maculatus_GLEAN_10002532,Lateolabrax_maculatus_GLEAN_10002879,Lateolabrax_maculatus_GLEAN_10003304,Lateolabrax_maculatus_GLEAN_10003893,Lateolabrax_maculatus_GLEAN_1…
GO:0048869	cellular developmental process	BP	1.66319e-08	1.11434e-06	136	3190	376	13395	Over	3	Lateolabrax_maculatus_GLEAN_10000500,Lateolabrax_maculatus_GLEAN_10000905,Lateolabrax_maculatus_GLEAN_10000953,Lateolabrax_maculatus_GLEAN_10001083,Lateolabrax_maculatus_GLEAN_10001203,Lateolabrax_maculatus_GLEAN_10001279,Lateolabrax_maculatus_GLEAN_10001452,Lateolabrax_maculatus_GLEAN_10001481,Lateolabrax_maculatus_GLEAN_10001764,Lateolabrax_maculatus_GLEAN_10001982,Lateolabrax_maculatus_GLEAN_1…
GO:0050793	regulation of developmental process	BP	4.21076e-07	2.15438e-05	79	1661	376	13395	Over	3	Lateolabrax_maculatus_GLEAN_10000899,Lateolabrax_maculatus_GLEAN_10000953,Lateolabrax_maculatus_GLEAN_10001764,Lateolabrax_maculatus_GLEAN_10001982,Lateolabrax_maculatus_GLEAN_10001989,Lateolabrax_maculatus_GLEAN_10002012,Lateolabrax_maculatus_GLEAN_10002023,Lateolabrax_maculatus_GLEAN_10002532,Lateolabrax_maculatus_GLEAN_10002879,Lateolabrax_maculatus_GLEAN_10003893,Lateolabrax_maculatus_GLEAN_1…
GO:0051239	regulation of multicellular organismal process	BP	2.64777e-06	0.000111206	77	1669	376	13395	Over	3	Lateolabrax_maculatus_GLEAN_10000500,Lateolabrax_maculatus_GLEAN_10000899,Lateolabrax_maculatus_GLEAN_10000953,Lateolabrax_maculatus_GLEAN_10001764,Lateolabrax_maculatus_GLEAN_10001982,Lateolabrax_maculatus_GLEAN_10001989,Lateolabrax_maculatus_GLEAN_10002012,Lateolabrax_maculatus_GLEAN_10002189,Lateolabrax_maculatus_GLEAN_10002532,Lateolabrax_maculatus_GLEAN_10002879,Lateolabrax_maculatus_GLEAN_1…
GO:0045926	negative regulation of growth	BP	2.31931e-05	0.000694312	9	56	376	13395	Over	3	Lateolabrax_maculatus_GLEAN_10002012,Lateolabrax_maculatus_GLEAN_10002532,Lateolabrax_maculatus_GLEAN_10003916,Lateolabrax_maculatus_GLEAN_10004409,Lateolabrax_maculatus_GLEAN_10008305,Lateolabrax_maculatus_GLEAN_10010893,Lateolabrax_maculatus_GLEAN_10015306,Lateolabrax_maculatus_GLEAN_10018833,Lateolabrax_maculatus_GLEAN_10019011
GO:0050794	regulation of cellular process	BP	3.15993e-05	0.000889205	227	6652	376	13395	Over	3	Lateolabrax_maculatus_GLEAN_10000154,Lateolabrax_maculatus_GLEAN_10000500,Lateolabrax_maculatus_GLEAN_10000899,Lateolabrax_maculatus_GLEAN_10000905,Lateolabrax_maculatus_GLEAN_10000953,Lateolabrax_maculatus_GLEAN_10000963,Lateolabrax_maculatus_GLEAN_10001168,Lateolabrax_maculatus_GLEAN_10001268,Lateolabrax_maculatus_GLEAN_10001279,Lateolabrax_maculatus_GLEAN_10001481,Lateolabrax_maculatus_GLEAN_1…
GO:0031589	cell-substrate adhesion	BP	3.96893e-14	1.59551e-11	23	191	376	13395	Over	4	Lateolabrax_maculatus_GLEAN_10002177,Lateolabrax_maculatus_GLEAN_10003304,Lateolabrax_maculatus_GLEAN_10003760,Lateolabrax_maculatus_GLEAN_10006602,Lateolabrax_maculatus_GLEAN_10006756,Lateolabrax_maculatus_GLEAN_10007063,Lateolabrax_maculatus_GLEAN_10007625,Lateolabrax_maculatus_GLEAN_10010117,Lateolabrax_maculatus_GLEAN_10010751,Lateolabrax_maculatus_GLEAN_10011673,Lateolabrax_maculatus_GLEAN_1…
GO:0048731	system development	BP	2.43548e-12	7.61493e-10	159	3542	376	13395	Over	4	Lateolabrax_maculatus_GLEAN_10000154,Lateolabrax_maculatus_GLEAN_10000500,Lateolabrax_maculatus_GLEAN_10000824,Lateolabrax_maculatus_GLEAN_10000899,Lateolabrax_maculatus_GLEAN_10000905,Lateolabrax_maculatus_GLEAN_10000953,Lateolabrax_maculatus_GLEAN_10001083,Lateolabrax_maculatus_GLEAN_10001452,Lateolabrax_maculatus_GLEAN_10001481,Lateolabrax_maculatus_GLEAN_10001751,Lateolabrax_maculatus_GLEAN_1…
GO:0009888	tissue development	BP	4.87174e-11	9.13938e-09	85	1570	376	13395	Over	4	Lateolabrax_maculatus_GLEAN_10000905,Lateolabrax_maculatus_GLEAN_10000953,Lateolabrax_maculatus_GLEAN_10000963,Lateolabrax_maculatus_GLEAN_10001083,Lateolabrax_maculatus_GLEAN_10001203,Lateolabrax_maculatus_GLEAN_10001481,Lateolabrax_maculatus_GLEAN_10001751,Lateolabrax_maculatus_GLEAN_10001982,Lateolabrax_maculatus_GLEAN_10001989,Lateolabrax_maculatus_GLEAN_10002012,Lateolabrax_maculatus_GLEAN_1…
GO:0006935	chemotaxis	BP	5.24025e-10	7.76108e-08	42	602	376	13395	Over	4	Lateolabrax_maculatus_GLEAN_10000905,Lateolabrax_maculatus_GLEAN_10001452,Lateolabrax_maculatus_GLEAN_10002532,Lateolabrax_maculatus_GLEAN_10002687,Lateolabrax_maculatus_GLEAN_10003455,Lateolabrax_maculatus_GLEAN_10003893,Lateolabrax_maculatus_GLEAN_10003916,Lateolabrax_maculatus_GLEAN_10004371,Lateolabrax_maculatus_GLEAN_10004409,Lateolabrax_maculatus_GLEAN_10004926,Lateolabrax_maculatus_GLEAN_1…
GO:0032989	cellular component morphogenesis	BP	6.67975e-10	8.54401e-08	56	916	376	13395	Over	4	Lateolabrax_maculatus_GLEAN_10000905,Lateolabrax_maculatus_GLEAN_10001279,Lateolabrax_maculatus_GLEAN_10001452,Lateolabrax_maculatus_GLEAN_10001989,Lateolabrax_maculatus_GLEAN_10002532,Lateolabrax_maculatus_GLEAN_10002687,Lateolabrax_maculatus_GLEAN_10002879,Lateolabrax_maculatus_GLEAN_10003455,Lateolabrax_maculatus_GLEAN_10003893,Lateolabrax_maculatus_GLEAN_10003916,Lateolabrax_maculatus_GLEAN_1…
GO:0000902	cell morphogenesis	BP	1.39286e-09	1.50302e-07	59	1000	376	13395	Over	4	Lateolabrax_maculatus_GLEAN_10000905,Lateolabrax_maculatus_GLEAN_10001452,Lateolabrax_maculatus_GLEAN_10002023,Lateolabrax_maculatus_GLEAN_10002532,Lateolabrax_maculatus_GLEAN_10002687,Lateolabrax_maculatus_GLEAN_10002879,Lateolabrax_maculatus_GLEAN_10003304,Lateolabrax_maculatus_GLEAN_10003455,Lateolabrax_maculatus_GLEAN_10003893,Lateolabrax_maculatus_GLEAN_10003916,Lateolabrax_maculatus_GLEAN_1…
GO:0048468	cell development	BP	2.17197e-09	2.0373e-07	89	1772	376	13395	Over	4	Lateolabrax_maculatus_GLEAN_10000905,Lateolabrax_maculatus_GLEAN_10001083,Lateolabrax_maculatus_GLEAN_10001279,Lateolabrax_maculatus_GLEAN_10001452,Lateolabrax_maculatus_GLEAN_10001481,Lateolabrax_maculatus_GLEAN_10001764,Lateolabrax_maculatus_GLEAN_10001982,Lateolabrax_maculatus_GLEAN_10001989,Lateolabrax_maculatus_GLEAN_10002532,Lateolabrax_maculatus_GLEAN_10002687,Lateolabrax_maculatus_GLEAN_1…
GO:0030154	cell differentiation	BP	2.32383e-09	2.04352e-07	131	2961	376	13395	Over	4	Lateolabrax_maculatus_GLEAN_10000500,Lateolabrax_maculatus_GLEAN_10000905,Lateolabrax_maculatus_GLEAN_10000953,Lateolabrax_maculatus_GLEAN_10001083,Lateolabrax_maculatus_GLEAN_10001203,Lateolabrax_maculatus_GLEAN_10001279,Lateolabrax_maculatus_GLEAN_10001452,Lateolabrax_maculatus_GLEAN_10001481,Lateolabrax_maculatus_GLEAN_10001764,Lateolabrax_maculatus_GLEAN_10001982,Lateolabrax_maculatus_GLEAN_1…
GO:0035295	tube development	BP	6.36034e-09	4.71e-07	50	817	376	13395	Over	4	Lateolabrax_maculatus_GLEAN_10000899,Lateolabrax_maculatus_GLEAN_10001989,Lateolabrax_maculatus_GLEAN_10002012,Lateolabrax_maculatus_GLEAN_10002189,Lateolabrax_maculatus_GLEAN_10002384,Lateolabrax_maculatus_GLEAN_10002532,Lateolabrax_maculatus_GLEAN_10002879,Lateolabrax_maculatus_GLEAN_10003304,Lateolabrax_maculatus_GLEAN_10003455,Lateolabrax_maculatus_GLEAN_10004039,Lateolabrax_maculatus_GLEAN_1…
GO:0048729	tissue morphogenesis	BP	3.78339e-08	2.36588e-06	38	576	376	13395	Over	4	Lateolabrax_maculatus_GLEAN_10000953,Lateolabrax_maculatus_GLEAN_10000963,Lateolabrax_maculatus_GLEAN_10001751,Lateolabrax_maculatus_GLEAN_10001989,Lateolabrax_maculatus_GLEAN_10002012,Lateolabrax_maculatus_GLEAN_10002189,Lateolabrax_maculatus_GLEAN_10002532,Lateolabrax_maculatus_GLEAN_10002879,Lateolabrax_maculatus_GLEAN_10003304,Lateolabrax_maculatus_GLEAN_10003455,Lateolabrax_maculatus_GLEAN_1…
GO:0016477	cell migration	BP	5.08208e-08	3.10891e-06	57	1026	376	13395	Over	4	Lateolabrax_maculatus_GLEAN_10000953,Lateolabrax_maculatus_GLEAN_10000963,Lateolabrax_maculatus_GLEAN_10001892,Lateolabrax_maculatus_GLEAN_10002189,Lateolabrax_maculatus_GLEAN_10002532,Lateolabrax_maculatus_GLEAN_10002879,Lateolabrax_maculatus_GLEAN_10003304,Lateolabrax_maculatus_GLEAN_10003893,Lateolabrax_maculatus_GLEAN_10003916,Lateolabrax_maculatus_GLEAN_10004088,Lateolabrax_maculatus_GLEAN_1…
GO:0097485	neuron projection guidance	BP	9.26371e-08	5.32002e-06	31	439	376	13395	Over	4	Lateolabrax_maculatus_GLEAN_10000905,Lateolabrax_maculatus_GLEAN_10001452,Lateolabrax_maculatus_GLEAN_10002532,Lateolabrax_maculatus_GLEAN_10002687,Lateolabrax_maculatus_GLEAN_10003455,Lateolabrax_maculatus_GLEAN_10003893,Lateolabrax_maculatus_GLEAN_10003916,Lateolabrax_maculatus_GLEAN_10004371,Lateolabrax_maculatus_GLEAN_10004409,Lateolabrax_maculatus_GLEAN_10004926,Lateolabrax_maculatus_GLEAN_1…
GO:2000026	regulation of multicellular organismal development	BP	1.04342e-07	5.87238e-06	54	968	376	13395	Over	4	Lateolabrax_maculatus_GLEAN_10000899,Lateolabrax_maculatus_GLEAN_10000953,Lateolabrax_maculatus_GLEAN_10001764,Lateolabrax_maculatus_GLEAN_10001982,Lateolabrax_maculatus_GLEAN_10001989,Lateolabrax_maculatus_GLEAN_10002012,Lateolabrax_maculatus_GLEAN_10002532,Lateolabrax_maculatus_GLEAN_10002879,Lateolabrax_maculatus_GLEAN_10003916,Lateolabrax_maculatus_GLEAN_10004039,Lateolabrax_maculatus_GLEAN_1…
GO:0035239	tube morphogenesis	BP	3.20526e-07	1.67029e-05	39	633	376	13395	Over	4	Lateolabrax_maculatus_GLEAN_10000899,Lateolabrax_maculatus_GLEAN_10001989,Lateolabrax_maculatus_GLEAN_10002012,Lateolabrax_maculatus_GLEAN_10002189,Lateolabrax_maculatus_GLEAN_10002532,Lateolabrax_maculatus_GLEAN_10002879,Lateolabrax_maculatus_GLEAN_10003304,Lateolabrax_maculatus_GLEAN_10003455,Lateolabrax_maculatus_GLEAN_10004807,Lateolabrax_maculatus_GLEAN_10006602,Lateolabrax_maculatus_GLEAN_1…
GO:0048640	negative regulation of developmental growth	BP	4.89031e-07	2.45738e-05	7	19	376	13395	Over	4	Lateolabrax_maculatus_GLEAN_10002012,Lateolabrax_maculatus_GLEAN_10002532,Lateolabrax_maculatus_GLEAN_10003916,Lateolabrax_maculatus_GLEAN_10004409,Lateolabrax_maculatus_GLEAN_10008305,Lateolabrax_maculatus_GLEAN_10010893,Lateolabrax_maculatus_GLEAN_10018833
GO:0043062	extracellular structure organization	BP	2.45417e-23	6.90604e-20	37	299	376	13395	Over	5	Lateolabrax_maculatus_GLEAN_10000905,Lateolabrax_maculatus_GLEAN_10001481,Lateolabrax_maculatus_GLEAN_10002687,Lateolabrax_maculatus_GLEAN_10002879,Lateolabrax_maculatus_GLEAN_10003304,Lateolabrax_maculatus_GLEAN_10003455,Lateolabrax_maculatus_GLEAN_10003760,Lateolabrax_maculatus_GLEAN_10004273,Lateolabrax_maculatus_GLEAN_10004383,Lateolabrax_maculatus_GLEAN_10005217,Lateolabrax_maculatus_GLEAN_1…
GO:0030030	cell projection organization	BP	6.41585e-10	8.54401e-08	66	1153	376	13395	Over	5	Lateolabrax_maculatus_GLEAN_10000905,Lateolabrax_maculatus_GLEAN_10000963,Lateolabrax_maculatus_GLEAN_10001083,Lateolabrax_maculatus_GLEAN_10001452,Lateolabrax_maculatus_GLEAN_10002532,Lateolabrax_maculatus_GLEAN_10002687,Lateolabrax_maculatus_GLEAN_10003455,Lateolabrax_maculatus_GLEAN_10003893,Lateolabrax_maculatus_GLEAN_10003916,Lateolabrax_maculatus_GLEAN_10004088,Lateolabrax_maculatus_GLEAN_1…
GO:0048858	cell projection morphogenesis	BP	1.48961e-09	1.50302e-07	47	725	376	13395	Over	5	Lateolabrax_maculatus_GLEAN_10000905,Lateolabrax_maculatus_GLEAN_10001452,Lateolabrax_maculatus_GLEAN_10002532,Lateolabrax_maculatus_GLEAN_10002687,Lateolabrax_maculatus_GLEAN_10003455,Lateolabrax_maculatus_GLEAN_10003893,Lateolabrax_maculatus_GLEAN_10003916,Lateolabrax_maculatus_GLEAN_10004371,Lateolabrax_maculatus_GLEAN_10004409,Lateolabrax_maculatus_GLEAN_10004926,Lateolabrax_maculatus_GLEAN_1…
GO:0032990	cell part morphogenesis	BP	1.48961e-09	1.50302e-07	47	725	376	13395	Over	5	Lateolabrax_maculatus_GLEAN_10000905,Lateolabrax_maculatus_GLEAN_10001452,Lateolabrax_maculatus_GLEAN_10002532,Lateolabrax_maculatus_GLEAN_10002687,Lateolabrax_maculatus_GLEAN_10003455,Lateolabrax_maculatus_GLEAN_10003893,Lateolabrax_maculatus_GLEAN_10003916,Lateolabrax_maculatus_GLEAN_10004371,Lateolabrax_maculatus_GLEAN_10004409,Lateolabrax_maculatus_GLEAN_10004926,Lateolabrax_maculatus_GLEAN_1…
GO:0022008	neurogenesis	BP	1.49554e-09	1.50302e-07	69	1245	376	13395	Over	5	Lateolabrax_maculatus_GLEAN_10000905,Lateolabrax_maculatus_GLEAN_10001083,Lateolabrax_maculatus_GLEAN_10001452,Lateolabrax_maculatus_GLEAN_10001764,Lateolabrax_maculatus_GLEAN_10002012,Lateolabrax_maculatus_GLEAN_10002532,Lateolabrax_maculatus_GLEAN_10002687,Lateolabrax_maculatus_GLEAN_10003455,Lateolabrax_maculatus_GLEAN_10003893,Lateolabrax_maculatus_GLEAN_10003916,Lateolabrax_maculatus_GLEAN_1…
GO:0000904	cell morphogenesis involved in differentiation	BP	2.26821e-09	2.04352e-07	36	496	376	13395	Over	5	Lateolabrax_maculatus_GLEAN_10000905,Lateolabrax_maculatus_GLEAN_10002532,Lateolabrax_maculatus_GLEAN_10002687,Lateolabrax_maculatus_GLEAN_10002879,Lateolabrax_maculatus_GLEAN_10003304,Lateolabrax_maculatus_GLEAN_10003916,Lateolabrax_maculatus_GLEAN_10004088,Lateolabrax_maculatus_GLEAN_10004409,Lateolabrax_maculatus_GLEAN_10004926,Lateolabrax_maculatus_GLEAN_10005626,Lateolabrax_maculatus_GLEAN_1…
GO:0072359	circulatory system development	BP	2.41657e-09	2.06068e-07	48	755	376	13395	Over	5	Lateolabrax_maculatus_GLEAN_10000899,Lateolabrax_maculatus_GLEAN_10001481,Lateolabrax_maculatus_GLEAN_10001989,Lateolabrax_maculatus_GLEAN_10002012,Lateolabrax_maculatus_GLEAN_10002189,Lateolabrax_maculatus_GLEAN_10002532,Lateolabrax_maculatus_GLEAN_10003304,Lateolabrax_maculatus_GLEAN_10003455,Lateolabrax_maculatus_GLEAN_10003893,Lateolabrax_maculatus_GLEAN_10004088,Lateolabrax_maculatus_GLEAN_1…
GO:0030182	neuron differentiation	BP	4.47032e-09	3.4943e-07	62	1096	376	13395	Over	5	Lateolabrax_maculatus_GLEAN_10000905,Lateolabrax_maculatus_GLEAN_10001083,Lateolabrax_maculatus_GLEAN_10001452,Lateolabrax_maculatus_GLEAN_10002012,Lateolabrax_maculatus_GLEAN_10002532,Lateolabrax_maculatus_GLEAN_10002687,Lateolabrax_maculatus_GLEAN_10003455,Lateolabrax_maculatus_GLEAN_10003893,Lateolabrax_maculatus_GLEAN_10003916,Lateolabrax_maculatus_GLEAN_10004039,Lateolabrax_maculatus_GLEAN_1…
GO:0048666	neuron development	BP	6.34087e-09	4.71e-07	56	958	376	13395	Over	5	Lateolabrax_maculatus_GLEAN_10000905,Lateolabrax_maculatus_GLEAN_10001083,Lateolabrax_maculatus_GLEAN_10001452,Lateolabrax_maculatus_GLEAN_10002532,Lateolabrax_maculatus_GLEAN_10002687,Lateolabrax_maculatus_GLEAN_10003455,Lateolabrax_maculatus_GLEAN_10003893,Lateolabrax_maculatus_GLEAN_10003916,Lateolabrax_maculatus_GLEAN_10004371,Lateolabrax_maculatus_GLEAN_10004409,Lateolabrax_maculatus_GLEAN_1…
GO:0002009	morphogenesis of an epithelium	BP	9.4919e-09	6.84877e-07	33	452	376	13395	Over	5	Lateolabrax_maculatus_GLEAN_10000953,Lateolabrax_maculatus_GLEAN_10000963,Lateolabrax_maculatus_GLEAN_10001989,Lateolabrax_maculatus_GLEAN_10002012,Lateolabrax_maculatus_GLEAN_10002189,Lateolabrax_maculatus_GLEAN_10002532,Lateolabrax_maculatus_GLEAN_10002879,Lateolabrax_maculatus_GLEAN_10003304,Lateolabrax_maculatus_GLEAN_10003455,Lateolabrax_maculatus_GLEAN_10004409,Lateolabrax_maculatus_GLEAN_1…
GO:0007399	nervous system development	BP	3.10651e-08	1.98675e-06	82	1661	376	13395	Over	5	Lateolabrax_maculatus_GLEAN_10000905,Lateolabrax_maculatus_GLEAN_10001083,Lateolabrax_maculatus_GLEAN_10001452,Lateolabrax_maculatus_GLEAN_10001764,Lateolabrax_maculatus_GLEAN_10002012,Lateolabrax_maculatus_GLEAN_10002532,Lateolabrax_maculatus_GLEAN_10002687,Lateolabrax_maculatus_GLEAN_10003455,Lateolabrax_maculatus_GLEAN_10003472,Lateolabrax_maculatus_GLEAN_10003893,Lateolabrax_maculatus_GLEAN_1…
GO:0010810	regulation of cell-substrate adhesion	BP	1.64287e-07	9.06477e-06	16	117	376	13395	Over	5	Lateolabrax_maculatus_GLEAN_10002177,Lateolabrax_maculatus_GLEAN_10003760,Lateolabrax_maculatus_GLEAN_10006602,Lateolabrax_maculatus_GLEAN_10007625,Lateolabrax_maculatus_GLEAN_10010117,Lateolabrax_maculatus_GLEAN_10010751,Lateolabrax_maculatus_GLEAN_10011673,Lateolabrax_maculatus_GLEAN_10011927,Lateolabrax_maculatus_GLEAN_10013077,Lateolabrax_maculatus_GLEAN_10013650,Lateolabrax_maculatus_GLEAN_1…
GO:0060562	epithelial tube morphogenesis	BP	6.11263e-07	2.96568e-05	22	280	376	13395	Over	5	Lateolabrax_maculatus_GLEAN_10001989,Lateolabrax_maculatus_GLEAN_10002012,Lateolabrax_maculatus_GLEAN_10002189,Lateolabrax_maculatus_GLEAN_10002879,Lateolabrax_maculatus_GLEAN_10003304,Lateolabrax_maculatus_GLEAN_10003455,Lateolabrax_maculatus_GLEAN_10004807,Lateolabrax_maculatus_GLEAN_10008655,Lateolabrax_maculatus_GLEAN_10010207,Lateolabrax_maculatus_GLEAN_10011012,Lateolabrax_maculatus_GLEAN_1…
GO:0001944	vasculature development	BP	1.04048e-06	4.87986e-05	30	451	376	13395	Over	5	Lateolabrax_maculatus_GLEAN_10000899,Lateolabrax_maculatus_GLEAN_10001481,Lateolabrax_maculatus_GLEAN_10001989,Lateolabrax_maculatus_GLEAN_10002532,Lateolabrax_maculatus_GLEAN_10003455,Lateolabrax_maculatus_GLEAN_10004088,Lateolabrax_maculatus_GLEAN_10006602,Lateolabrax_maculatus_GLEAN_10008305,Lateolabrax_maculatus_GLEAN_10008655,Lateolabrax_maculatus_GLEAN_10009058,Lateolabrax_maculatus_GLEAN_1…
GO:0072358	cardiovascular system development	BP	1.36097e-06	6.07902e-05	30	455	376	13395	Over	5	Lateolabrax_maculatus_GLEAN_10000899,Lateolabrax_maculatus_GLEAN_10001481,Lateolabrax_maculatus_GLEAN_10001989,Lateolabrax_maculatus_GLEAN_10002532,Lateolabrax_maculatus_GLEAN_10003455,Lateolabrax_maculatus_GLEAN_10004088,Lateolabrax_maculatus_GLEAN_10006602,Lateolabrax_maculatus_GLEAN_10008305,Lateolabrax_maculatus_GLEAN_10008655,Lateolabrax_maculatus_GLEAN_10009058,Lateolabrax_maculatus_GLEAN_1…

## Sheet: 0-72 down
GO_ID	GO_Term	GO_Class	Pvalue	AdjustedPv	x1	x2	n	N	EnrichDirect	GOlevl	GeneID
GO:0009607	response to biotic stimulus	BP	6.74159e-14	1.25191e-10	22	547	124	13395	Over	3	Lateolabrax_maculatus_GLEAN_10001619,Lateolabrax_maculatus_GLEAN_10002150,Lateolabrax_maculatus_GLEAN_10002895,Lateolabrax_maculatus_GLEAN_10004167,Lateolabrax_maculatus_GLEAN_10005529,Lateolabrax_maculatus_GLEAN_10005592,Lateolabrax_maculatus_GLEAN_10006292,Lateolabrax_maculatus_GLEAN_10008031,Lateolabrax_maculatus_GLEAN_10009380,Lateolabrax_maculatus_GLEAN_10010144,Lateolabrax_maculatus_GLEAN_1…
GO:0051707	response to other organism	BP	3.77443e-07	4.12301e-05	19	529	124	13395	Over	3	Lateolabrax_maculatus_GLEAN_10002150,Lateolabrax_maculatus_GLEAN_10002895,Lateolabrax_maculatus_GLEAN_10005529,Lateolabrax_maculatus_GLEAN_10005592,Lateolabrax_maculatus_GLEAN_10006292,Lateolabrax_maculatus_GLEAN_10008031,Lateolabrax_maculatus_GLEAN_10009380,Lateolabrax_maculatus_GLEAN_10010144,Lateolabrax_maculatus_GLEAN_10011357,Lateolabrax_maculatus_GLEAN_10011823,Lateolabrax_maculatus_GLEAN_1…
GO:0099080	supramolecular complex	CC	6.04217e-07	5.61015e-05	17	440	124	13395	Over	3	Lateolabrax_maculatus_GLEAN_10000935,Lateolabrax_maculatus_GLEAN_10001157,Lateolabrax_maculatus_GLEAN_10002150,Lateolabrax_maculatus_GLEAN_10004166,Lateolabrax_maculatus_GLEAN_10004167,Lateolabrax_maculatus_GLEAN_10011357,Lateolabrax_maculatus_GLEAN_10011614,Lateolabrax_maculatus_GLEAN_10011618,Lateolabrax_maculatus_GLEAN_10011823,Lateolabrax_maculatus_GLEAN_10013088,Lateolabrax_maculatus_GLEAN_1…
GO:0007049	cell cycle	BP	1.94885e-05	0.00103401	24	1122	124	13395	Over	3	Lateolabrax_maculatus_GLEAN_10000707,Lateolabrax_maculatus_GLEAN_10003941,Lateolabrax_maculatus_GLEAN_10006292,Lateolabrax_maculatus_GLEAN_10006361,Lateolabrax_maculatus_GLEAN_10007233,Lateolabrax_maculatus_GLEAN_10009046,Lateolabrax_maculatus_GLEAN_10009380,Lateolabrax_maculatus_GLEAN_10011349,Lateolabrax_maculatus_GLEAN_10011357,Lateolabrax_maculatus_GLEAN_10013207,Lateolabrax_maculatus_GLEAN_1…
GO:0030029	actin filament-based process	BP	3.17105e-05	0.00153155	15	565	124	13395	Over	3	Lateolabrax_maculatus_GLEAN_10001157,Lateolabrax_maculatus_GLEAN_10001741,Lateolabrax_maculatus_GLEAN_10004167,Lateolabrax_maculatus_GLEAN_10007018,Lateolabrax_maculatus_GLEAN_10011357,Lateolabrax_maculatus_GLEAN_10011614,Lateolabrax_maculatus_GLEAN_10011618,Lateolabrax_maculatus_GLEAN_10013088,Lateolabrax_maculatus_GLEAN_10013776,Lateolabrax_maculatus_GLEAN_10014804,Lateolabrax_maculatus_GLEAN_1…
GO:0009605	response to external stimulus	BP	4.7451e-05	0.00204922	30	1605	124	13395	Over	3	Lateolabrax_maculatus_GLEAN_10001619,Lateolabrax_maculatus_GLEAN_10002117,Lateolabrax_maculatus_GLEAN_10002150,Lateolabrax_maculatus_GLEAN_10002895,Lateolabrax_maculatus_GLEAN_10003582,Lateolabrax_maculatus_GLEAN_10004167,Lateolabrax_maculatus_GLEAN_10005529,Lateolabrax_maculatus_GLEAN_10005592,Lateolabrax_maculatus_GLEAN_10006292,Lateolabrax_maculatus_GLEAN_10008031,Lateolabrax_maculatus_GLEAN_1…
GO:0042221	response to chemical	BP	5.21507e-05	0.00217892	44	2744	124	13395	Over	3	Lateolabrax_maculatus_GLEAN_10000028,Lateolabrax_maculatus_GLEAN_10000707,Lateolabrax_maculatus_GLEAN_10000935,Lateolabrax_maculatus_GLEAN_10001169,Lateolabrax_maculatus_GLEAN_10001619,Lateolabrax_maculatus_GLEAN_10001842,Lateolabrax_maculatus_GLEAN_10002117,Lateolabrax_maculatus_GLEAN_10002150,Lateolabrax_maculatus_GLEAN_10002895,Lateolabrax_maculatus_GLEAN_10003582,Lateolabrax_maculatus_GLEAN_1…
GO:0016459	myosin complex	CC	9.51844e-05	0.00339918	5	50	124	13395	Over	3	Lateolabrax_maculatus_GLEAN_10001157,Lateolabrax_maculatus_GLEAN_10007018,Lateolabrax_maculatus_GLEAN_10011614,Lateolabrax_maculatus_GLEAN_10011618,Lateolabrax_maculatus_GLEAN_10014804
GO:0098687	chromosomal region	CC	0.000212371	0.00625989	7	131	124	13395	Over	3	Lateolabrax_maculatus_GLEAN_10006361,Lateolabrax_maculatus_GLEAN_10011349,Lateolabrax_maculatus_GLEAN_10014232,Lateolabrax_maculatus_GLEAN_10015881,Lateolabrax_maculatus_GLEAN_10016405,Lateolabrax_maculatus_GLEAN_10017931,Lateolabrax_maculatus_GLEAN_10023318
GO:0022403	cell cycle phase	BP	0.000218747	0.00633048	9	222	124	13395	Over	3	Lateolabrax_maculatus_GLEAN_10000707,Lateolabrax_maculatus_GLEAN_10003941,Lateolabrax_maculatus_GLEAN_10006361,Lateolabrax_maculatus_GLEAN_10007233,Lateolabrax_maculatus_GLEAN_10011349,Lateolabrax_maculatus_GLEAN_10014232,Lateolabrax_maculatus_GLEAN_10017931,Lateolabrax_maculatus_GLEAN_10018323,Lateolabrax_maculatus_GLEAN_10023318
GO:0006950	response to stress	BP	0.000248291	0.00662984	37	2291	124	13395	Over	3	Lateolabrax_maculatus_GLEAN_10000990,Lateolabrax_maculatus_GLEAN_10001619,Lateolabrax_maculatus_GLEAN_10001842,Lateolabrax_maculatus_GLEAN_10002117,Lateolabrax_maculatus_GLEAN_10002895,Lateolabrax_maculatus_GLEAN_10003941,Lateolabrax_maculatus_GLEAN_10004167,Lateolabrax_maculatus_GLEAN_10005529,Lateolabrax_maculatus_GLEAN_10005592,Lateolabrax_maculatus_GLEAN_10006253,Lateolabrax_maculatus_GLEAN_1…
GO:0043229	intracellular organelle	CC	0.000406175	0.00941972	87	7234	124	13395	Over	3	Lateolabrax_maculatus_GLEAN_10000028,Lateolabrax_maculatus_GLEAN_10000081,Lateolabrax_maculatus_GLEAN_10000707,Lateolabrax_maculatus_GLEAN_10000935,Lateolabrax_maculatus_GLEAN_10001157,Lateolabrax_maculatus_GLEAN_10001547,Lateolabrax_maculatus_GLEAN_10001551,Lateolabrax_maculatus_GLEAN_10001619,Lateolabrax_maculatus_GLEAN_10001856,Lateolabrax_maculatus_GLEAN_10002117,Lateolabrax_maculatus_GLEAN_1…
GO:0036379	myofilament	CC	0.000570788	0.0104946	3	18	124	13395	Over	3	Lateolabrax_maculatus_GLEAN_10011357,Lateolabrax_maculatus_GLEAN_10017047,Lateolabrax_maculatus_GLEAN_10017588
GO:0043226	organelle	CC	0.000593018	0.0106709	90	7632	124	13395	Over	3	Lateolabrax_maculatus_GLEAN_10000028,Lateolabrax_maculatus_GLEAN_10000081,Lateolabrax_maculatus_GLEAN_10000707,Lateolabrax_maculatus_GLEAN_10000935,Lateolabrax_maculatus_GLEAN_10001157,Lateolabrax_maculatus_GLEAN_10001547,Lateolabrax_maculatus_GLEAN_10001551,Lateolabrax_maculatus_GLEAN_10001619,Lateolabrax_maculatus_GLEAN_10001856,Lateolabrax_maculatus_GLEAN_10002117,Lateolabrax_maculatus_GLEAN_1…
GO:0003008	system process	BP	0.000722046	0.0123013	26	1484	124	13395	Over	3	Lateolabrax_maculatus_GLEAN_10000935,Lateolabrax_maculatus_GLEAN_10001157,Lateolabrax_maculatus_GLEAN_10001551,Lateolabrax_maculatus_GLEAN_10001741,Lateolabrax_maculatus_GLEAN_10001842,Lateolabrax_maculatus_GLEAN_10007018,Lateolabrax_maculatus_GLEAN_10008167,Lateolabrax_maculatus_GLEAN_10009046,Lateolabrax_maculatus_GLEAN_10009075,Lateolabrax_maculatus_GLEAN_10009306,Lateolabrax_maculatus_GLEAN_1…
GO:0030048	actin filament-based movement	BP	4.20104e-10	1.56027e-07	12	111	124	13395	Over	4	Lateolabrax_maculatus_GLEAN_10001741,Lateolabrax_maculatus_GLEAN_10011357,Lateolabrax_maculatus_GLEAN_10011614,Lateolabrax_maculatus_GLEAN_10011618,Lateolabrax_maculatus_GLEAN_10013088,Lateolabrax_maculatus_GLEAN_10013776,Lateolabrax_maculatus_GLEAN_10014804,Lateolabrax_maculatus_GLEAN_10016321,Lateolabrax_maculatus_GLEAN_10016494,Lateolabrax_maculatus_GLEAN_10017047,Lateolabrax_maculatus_GLEAN_1…
GO:0003012	muscle system process	BP	7.27969e-09	1.6898e-06	19	412	124	13395	Over	4	Lateolabrax_maculatus_GLEAN_10001157,Lateolabrax_maculatus_GLEAN_10001551,Lateolabrax_maculatus_GLEAN_10001741,Lateolabrax_maculatus_GLEAN_10001842,Lateolabrax_maculatus_GLEAN_10007018,Lateolabrax_maculatus_GLEAN_10009380,Lateolabrax_maculatus_GLEAN_10011357,Lateolabrax_maculatus_GLEAN_10011614,Lateolabrax_maculatus_GLEAN_10011618,Lateolabrax_maculatus_GLEAN_10013776,Lateolabrax_maculatus_GLEAN_1…
GO:0043207	response to external biotic stimulus	BP	2.10462e-08	4.34254e-06	21	539	124	13395	Over	4	Lateolabrax_maculatus_GLEAN_10001619,Lateolabrax_maculatus_GLEAN_10002150,Lateolabrax_maculatus_GLEAN_10002895,Lateolabrax_maculatus_GLEAN_10004167,Lateolabrax_maculatus_GLEAN_10005529,Lateolabrax_maculatus_GLEAN_10005592,Lateolabrax_maculatus_GLEAN_10006292,Lateolabrax_maculatus_GLEAN_10008031,Lateolabrax_maculatus_GLEAN_10009380,Lateolabrax_maculatus_GLEAN_10010144,Lateolabrax_maculatus_GLEAN_1…
GO:0009888	tissue development	BP	4.67592e-07	4.63708e-05	33	1570	124	13395	Over	4	Lateolabrax_maculatus_GLEAN_10001157,Lateolabrax_maculatus_GLEAN_10001547,Lateolabrax_maculatus_GLEAN_10001741,Lateolabrax_maculatus_GLEAN_10004167,Lateolabrax_maculatus_GLEAN_10005529,Lateolabrax_maculatus_GLEAN_10007018,Lateolabrax_maculatus_GLEAN_10007233,Lateolabrax_maculatus_GLEAN_10008167,Lateolabrax_maculatus_GLEAN_10009294,Lateolabrax_maculatus_GLEAN_10009380,Lateolabrax_maculatus_GLEAN_1…
GO:0061061	muscle structure development	BP	4.74445e-07	4.63708e-05	19	537	124	13395	Over	4	Lateolabrax_maculatus_GLEAN_10001157,Lateolabrax_maculatus_GLEAN_10001741,Lateolabrax_maculatus_GLEAN_10005529,Lateolabrax_maculatus_GLEAN_10007018,Lateolabrax_maculatus_GLEAN_10010144,Lateolabrax_maculatus_GLEAN_10011357,Lateolabrax_maculatus_GLEAN_10011614,Lateolabrax_maculatus_GLEAN_10011618,Lateolabrax_maculatus_GLEAN_10012262,Lateolabrax_maculatus_GLEAN_10013683,Lateolabrax_maculatus_GLEAN_1…
GO:0048729	tissue morphogenesis	BP	6.80409e-07	6.01676e-05	17	576	124	13395	Over	4	Lateolabrax_maculatus_GLEAN_10001157,Lateolabrax_maculatus_GLEAN_10001547,Lateolabrax_maculatus_GLEAN_10001741,Lateolabrax_maculatus_GLEAN_10007018,Lateolabrax_maculatus_GLEAN_10011357,Lateolabrax_maculatus_GLEAN_10011433,Lateolabrax_maculatus_GLEAN_10011614,Lateolabrax_maculatus_GLEAN_10011618,Lateolabrax_maculatus_GLEAN_10013776,Lateolabrax_maculatus_GLEAN_10014873,Lateolabrax_maculatus_GLEAN_1…
GO:1901700	response to oxygen-containing compound	BP	3.66561e-06	0.000243109	20	796	124	13395	Over	4	Lateolabrax_maculatus_GLEAN_10001619,Lateolabrax_maculatus_GLEAN_10001842,Lateolabrax_maculatus_GLEAN_10002117,Lateolabrax_maculatus_GLEAN_10002150,Lateolabrax_maculatus_GLEAN_10003784,Lateolabrax_maculatus_GLEAN_10005529,Lateolabrax_maculatus_GLEAN_10009046,Lateolabrax_maculatus_GLEAN_10009380,Lateolabrax_maculatus_GLEAN_10010144,Lateolabrax_maculatus_GLEAN_10011357,Lateolabrax_maculatus_GLEAN_1…
GO:0016460	myosin II complex	CC	6.23119e-06	0.000399011	5	29	124	13395	Over	4	Lateolabrax_maculatus_GLEAN_10001157,Lateolabrax_maculatus_GLEAN_10007018,Lateolabrax_maculatus_GLEAN_10011614,Lateolabrax_maculatus_GLEAN_10011618,Lateolabrax_maculatus_GLEAN_10014804
GO:0010033	response to organic substance	BP	1.11617e-05	0.000647726	35	1894	124	13395	Over	4	Lateolabrax_maculatus_GLEAN_10000028,Lateolabrax_maculatus_GLEAN_10000707,Lateolabrax_maculatus_GLEAN_10001619,Lateolabrax_maculatus_GLEAN_10002117,Lateolabrax_maculatus_GLEAN_10002150,Lateolabrax_maculatus_GLEAN_10002895,Lateolabrax_maculatus_GLEAN_10003784,Lateolabrax_maculatus_GLEAN_10003966,Lateolabrax_maculatus_GLEAN_10004167,Lateolabrax_maculatus_GLEAN_10005529,Lateolabrax_maculatus_GLEAN_1…
GO:0099081	supramolecular polymer	CC	1.84e-05	0.00100497	12	295	124	13395	Over	4	Lateolabrax_maculatus_GLEAN_10000935,Lateolabrax_maculatus_GLEAN_10001157,Lateolabrax_maculatus_GLEAN_10002150,Lateolabrax_maculatus_GLEAN_10004166,Lateolabrax_maculatus_GLEAN_10004167,Lateolabrax_maculatus_GLEAN_10011357,Lateolabrax_maculatus_GLEAN_10011614,Lateolabrax_maculatus_GLEAN_10011618,Lateolabrax_maculatus_GLEAN_10013088,Lateolabrax_maculatus_GLEAN_10013683,Lateolabrax_maculatus_GLEAN_1…
GO:0000775	chromosome, centromeric region	CC	3.2165e-05	0.00153155	6	66	124	13395	Over	4	Lateolabrax_maculatus_GLEAN_10006361,Lateolabrax_maculatus_GLEAN_10011349,Lateolabrax_maculatus_GLEAN_10014232,Lateolabrax_maculatus_GLEAN_10015881,Lateolabrax_maculatus_GLEAN_10017931,Lateolabrax_maculatus_GLEAN_10023318
GO:0043292	contractile fiber	CC	5.93244e-05	0.00234394	9	187	124	13395	Over	4	Lateolabrax_maculatus_GLEAN_10000935,Lateolabrax_maculatus_GLEAN_10001157,Lateolabrax_maculatus_GLEAN_10004167,Lateolabrax_maculatus_GLEAN_10011357,Lateolabrax_maculatus_GLEAN_10011614,Lateolabrax_maculatus_GLEAN_10011618,Lateolabrax_maculatus_GLEAN_10013683,Lateolabrax_maculatus_GLEAN_10017047,Lateolabrax_maculatus_GLEAN_10017588
GO:0043232	intracellular non-membrane-bounded organelle	CC	0.000105481	0.00349781	38	2300	124	13395	Over	4	Lateolabrax_maculatus_GLEAN_10000707,Lateolabrax_maculatus_GLEAN_10000935,Lateolabrax_maculatus_GLEAN_10001157,Lateolabrax_maculatus_GLEAN_10001619,Lateolabrax_maculatus_GLEAN_10002150,Lateolabrax_maculatus_GLEAN_10003512,Lateolabrax_maculatus_GLEAN_10004166,Lateolabrax_maculatus_GLEAN_10004167,Lateolabrax_maculatus_GLEAN_10006361,Lateolabrax_maculatus_GLEAN_10007018,Lateolabrax_maculatus_GLEAN_1…
GO:0043228	non-membrane-bounded organelle	CC	0.000105481	0.00349781	38	2300	124	13395	Over	4	Lateolabrax_maculatus_GLEAN_10000707,Lateolabrax_maculatus_GLEAN_10000935,Lateolabrax_maculatus_GLEAN_10001157,Lateolabrax_maculatus_GLEAN_10001619,Lateolabrax_maculatus_GLEAN_10002150,Lateolabrax_maculatus_GLEAN_10003512,Lateolabrax_maculatus_GLEAN_10004166,Lateolabrax_maculatus_GLEAN_10004167,Lateolabrax_maculatus_GLEAN_10006361,Lateolabrax_maculatus_GLEAN_10007018,Lateolabrax_maculatus_GLEAN_1…
GO:0010941	regulation of cell death	BP	0.000151711	0.00469547	22	1085	124	13395	Over	4	Lateolabrax_maculatus_GLEAN_10001551,Lateolabrax_maculatus_GLEAN_10001619,Lateolabrax_maculatus_GLEAN_10004166,Lateolabrax_maculatus_GLEAN_10005529,Lateolabrax_maculatus_GLEAN_10006292,Lateolabrax_maculatus_GLEAN_10008031,Lateolabrax_maculatus_GLEAN_10008032,Lateolabrax_maculatus_GLEAN_10009046,Lateolabrax_maculatus_GLEAN_10009380,Lateolabrax_maculatus_GLEAN_10011357,Lateolabrax_maculatus_GLEAN_1…
GO:0006936	muscle contraction	BP	4.88404e-11	3.02322e-08	18	269	124	13395	Over	5	Lateolabrax_maculatus_GLEAN_10001157,Lateolabrax_maculatus_GLEAN_10001741,Lateolabrax_maculatus_GLEAN_10001842,Lateolabrax_maculatus_GLEAN_10007018,Lateolabrax_maculatus_GLEAN_10009380,Lateolabrax_maculatus_GLEAN_10011357,Lateolabrax_maculatus_GLEAN_10011614,Lateolabrax_maculatus_GLEAN_10011618,Lateolabrax_maculatus_GLEAN_10013776,Lateolabrax_maculatus_GLEAN_10014804,Lateolabrax_maculatus_GLEAN_1…
GO:0070252	actin-mediated cell contraction	BP	1.37245e-10	6.37159e-08	12	101	124	13395	Over	5	Lateolabrax_maculatus_GLEAN_10001741,Lateolabrax_maculatus_GLEAN_10011357,Lateolabrax_maculatus_GLEAN_10011614,Lateolabrax_maculatus_GLEAN_10011618,Lateolabrax_maculatus_GLEAN_10013088,Lateolabrax_maculatus_GLEAN_10013776,Lateolabrax_maculatus_GLEAN_10014804,Lateolabrax_maculatus_GLEAN_10016321,Lateolabrax_maculatus_GLEAN_10016494,Lateolabrax_maculatus_GLEAN_10017047,Lateolabrax_maculatus_GLEAN_1…
GO:0060415	muscle tissue morphogenesis	BP	1.15352e-09	3.57013e-07	12	121	124	13395	Over	5	Lateolabrax_maculatus_GLEAN_10001157,Lateolabrax_maculatus_GLEAN_10001741,Lateolabrax_maculatus_GLEAN_10007018,Lateolabrax_maculatus_GLEAN_10011357,Lateolabrax_maculatus_GLEAN_10011614,Lateolabrax_maculatus_GLEAN_10011618,Lateolabrax_maculatus_GLEAN_10013776,Lateolabrax_maculatus_GLEAN_10016321,Lateolabrax_maculatus_GLEAN_10016494,Lateolabrax_maculatus_GLEAN_10017047,Lateolabrax_maculatus_GLEAN_1…
GO:0048644	muscle organ morphogenesis	BP	2.02268e-09	5.36588e-07	12	127	124	13395	Over	5	Lateolabrax_maculatus_GLEAN_10001157,Lateolabrax_maculatus_GLEAN_10001741,Lateolabrax_maculatus_GLEAN_10007018,Lateolabrax_maculatus_GLEAN_10011357,Lateolabrax_maculatus_GLEAN_10011614,Lateolabrax_maculatus_GLEAN_10011618,Lateolabrax_maculatus_GLEAN_10013776,Lateolabrax_maculatus_GLEAN_10016321,Lateolabrax_maculatus_GLEAN_10016494,Lateolabrax_maculatus_GLEAN_10017047,Lateolabrax_maculatus_GLEAN_1…
GO:1902652	secondary alcohol metabolic process	BP	4.01683e-08	5.73788e-06	7	37	124	13395	Over	5	Lateolabrax_maculatus_GLEAN_10000028,Lateolabrax_maculatus_GLEAN_10003044,Lateolabrax_maculatus_GLEAN_10004070,Lateolabrax_maculatus_GLEAN_10004923,Lateolabrax_maculatus_GLEAN_10016502,Lateolabrax_maculatus_GLEAN_10017138,Lateolabrax_maculatus_GLEAN_10018186
GO:0007517	muscle organ development	BP	1.42067e-07	1.75878e-05	14	263	124	13395	Over	5	Lateolabrax_maculatus_GLEAN_10001157,Lateolabrax_maculatus_GLEAN_10001741,Lateolabrax_maculatus_GLEAN_10007018,Lateolabrax_maculatus_GLEAN_10010144,Lateolabrax_maculatus_GLEAN_10011357,Lateolabrax_maculatus_GLEAN_10011614,Lateolabrax_maculatus_GLEAN_10011618,Lateolabrax_maculatus_GLEAN_10013776,Lateolabrax_maculatus_GLEAN_10015902,Lateolabrax_maculatus_GLEAN_10016321,Lateolabrax_maculatus_GLEAN_1…
GO:0016125	sterol metabolic process	BP	1.48733e-06	0.000120086	8	88	124	13395	Over	5	Lateolabrax_maculatus_GLEAN_10000028,Lateolabrax_maculatus_GLEAN_10003044,Lateolabrax_maculatus_GLEAN_10004070,Lateolabrax_maculatus_GLEAN_10004923,Lateolabrax_maculatus_GLEAN_10015881,Lateolabrax_maculatus_GLEAN_10016502,Lateolabrax_maculatus_GLEAN_10017138,Lateolabrax_maculatus_GLEAN_10018186
GO:0055001	muscle cell development	BP	2.31114e-06	0.000160674	11	199	124	13395	Over	5	Lateolabrax_maculatus_GLEAN_10001157,Lateolabrax_maculatus_GLEAN_10007018,Lateolabrax_maculatus_GLEAN_10011357,Lateolabrax_maculatus_GLEAN_10011614,Lateolabrax_maculatus_GLEAN_10011618,Lateolabrax_maculatus_GLEAN_10013683,Lateolabrax_maculatus_GLEAN_10013776,Lateolabrax_maculatus_GLEAN_10014232,Lateolabrax_maculatus_GLEAN_10017047,Lateolabrax_maculatus_GLEAN_10017588,Lateolabrax_maculatus_GLEAN_1…
GO:0031032	actomyosin structure organization	BP	2.31278e-06	0.000160674	9	125	124	13395	Over	5	Lateolabrax_maculatus_GLEAN_10001157,Lateolabrax_maculatus_GLEAN_10004167,Lateolabrax_maculatus_GLEAN_10007018,Lateolabrax_maculatus_GLEAN_10011357,Lateolabrax_maculatus_GLEAN_10011614,Lateolabrax_maculatus_GLEAN_10011618,Lateolabrax_maculatus_GLEAN_10013776,Lateolabrax_maculatus_GLEAN_10017047,Lateolabrax_maculatus_GLEAN_10017588
GO:0060537	muscle tissue development	BP	2.33613e-06	0.000160674	14	332	124	13395	Over	5	Lateolabrax_maculatus_GLEAN_10001157,Lateolabrax_maculatus_GLEAN_10001741,Lateolabrax_maculatus_GLEAN_10007018,Lateolabrax_maculatus_GLEAN_10010144,Lateolabrax_maculatus_GLEAN_10011614,Lateolabrax_maculatus_GLEAN_10011618,Lateolabrax_maculatus_GLEAN_10013683,Lateolabrax_maculatus_GLEAN_10013776,Lateolabrax_maculatus_GLEAN_10014232,Lateolabrax_maculatus_GLEAN_10014804,Lateolabrax_maculatus_GLEAN_1…
GO:0072359	circulatory system development	BP	6.69718e-06	0.000404336	19	755	124	13395	Over	5	Lateolabrax_maculatus_GLEAN_10001157,Lateolabrax_maculatus_GLEAN_10001741,Lateolabrax_maculatus_GLEAN_10006292,Lateolabrax_maculatus_GLEAN_10007018,Lateolabrax_maculatus_GLEAN_10008167,Lateolabrax_maculatus_GLEAN_10009099,Lateolabrax_maculatus_GLEAN_10011357,Lateolabrax_maculatus_GLEAN_10011614,Lateolabrax_maculatus_GLEAN_10011618,Lateolabrax_maculatus_GLEAN_10012262,Lateolabrax_maculatus_GLEAN_1…
GO:0099512	supramolecular fiber	CC	1.84e-05	0.00100497	12	295	124	13395	Over	5	Lateolabrax_maculatus_GLEAN_10000935,Lateolabrax_maculatus_GLEAN_10001157,Lateolabrax_maculatus_GLEAN_10002150,Lateolabrax_maculatus_GLEAN_10004166,Lateolabrax_maculatus_GLEAN_10004167,Lateolabrax_maculatus_GLEAN_10011357,Lateolabrax_maculatus_GLEAN_10011614,Lateolabrax_maculatus_GLEAN_10011618,Lateolabrax_maculatus_GLEAN_10013088,Lateolabrax_maculatus_GLEAN_10013683,Lateolabrax_maculatus_GLEAN_1…
GO:0042692	muscle cell differentiation	BP	2.06617e-05	0.0010658	13	349	124	13395	Over	5	Lateolabrax_maculatus_GLEAN_10001157,Lateolabrax_maculatus_GLEAN_10005529,Lateolabrax_maculatus_GLEAN_10007018,Lateolabrax_maculatus_GLEAN_10011357,Lateolabrax_maculatus_GLEAN_10011614,Lateolabrax_maculatus_GLEAN_10011618,Lateolabrax_maculatus_GLEAN_10012262,Lateolabrax_maculatus_GLEAN_10013683,Lateolabrax_maculatus_GLEAN_10013776,Lateolabrax_maculatus_GLEAN_10014232,Lateolabrax_maculatus_GLEAN_1…
GO:0030239	myofibril assembly	BP	3.50635e-05	0.00162782	6	67	124	13395	Over	5	Lateolabrax_maculatus_GLEAN_10001157,Lateolabrax_maculatus_GLEAN_10007018,Lateolabrax_maculatus_GLEAN_10011357,Lateolabrax_maculatus_GLEAN_10013776,Lateolabrax_maculatus_GLEAN_10017047,Lateolabrax_maculatus_GLEAN_10017588
GO:0003015	heart process	BP	3.7163e-05	0.00168321	10	220	124	13395	Over	5	Lateolabrax_maculatus_GLEAN_10001157,Lateolabrax_maculatus_GLEAN_10007018,Lateolabrax_maculatus_GLEAN_10011357,Lateolabrax_maculatus_GLEAN_10011614,Lateolabrax_maculatus_GLEAN_10011618,Lateolabrax_maculatus_GLEAN_10013776,Lateolabrax_maculatus_GLEAN_10017047,Lateolabrax_maculatus_GLEAN_10017588,Lateolabrax_maculatus_GLEAN_10018360,Lateolabrax_maculatus_GLEAN_10020004

## Sheet: SW-BW up
GO_ID	GO_Term	GO_Class	Pvalue	AdjustedPv	x1	x2	n	N	EnrichDirect	GOlevl	GeneID
GO:0003014	renal system process	BP	0.0029329	0.0684344	2	124	9	13395	Over	4	Lateolabrax_maculatus_GLEAN_10002773,Lateolabrax_maculatus_GLEAN_10006288
GO:0006805	xenobiotic metabolic process	BP	0.00736878	0.0967152	1	11	9	13395	Over	4	Lateolabrax_maculatus_GLEAN_10018461
GO:0006956	complement activation	BP	0.0153524	0.128769	1	23	9	13395	Over	4	Lateolabrax_maculatus_GLEAN_10022340
GO:0016701	oxidoreductase activity, acting on single donors with incorporation of molecular oxygen	MF	0.0180008	0.128769	1	27	9	13395	Over	4	Lateolabrax_maculatus_GLEAN_10018461
GO:0006959	humoral immune response	BP	0.020643	0.13547	1	31	9	13395	Over	4	Lateolabrax_maculatus_GLEAN_10022340
GO:0009410	response to xenobiotic stimulus	BP	0.0383128	0.194809	1	58	9	13395	Over	4	Lateolabrax_maculatus_GLEAN_10018461
GO:0061134	peptidase regulator activity	MF	0.0441395	0.208502	1	67	9	13395	Over	4	Lateolabrax_maculatus_GLEAN_10001916
GO:0051213	dioxygenase activity	MF	0.0441395	0.208502	1	67	9	13395	Over	4	Lateolabrax_maculatus_GLEAN_10018461
GO:0019530	taurine metabolic process	BP	0.00201447	0.0604342	1	3	9	13395	Over	5	Lateolabrax_maculatus_GLEAN_10018461
GO:0044273	sulfur compound catabolic process	BP	0.00201447	0.0604342	1	3	9	13395	Over	5	Lateolabrax_maculatus_GLEAN_10018461
GO:0019694	alkanesulfonate metabolic process	BP	0.00201447	0.0604342	1	3	9	13395	Over	5	Lateolabrax_maculatus_GLEAN_10018461
GO:0003096	renal sodium ion transport	BP	0.00402534	0.0768474	1	6	9	13395	Over	5	Lateolabrax_maculatus_GLEAN_10006288
GO:0071466	cellular response to xenobiotic stimulus	BP	0.00736878	0.0967152	1	11	9	13395	Over	5	Lateolabrax_maculatus_GLEAN_10018461
GO:0016504	peptidase activator activity	MF	0.00937005	0.109317	1	14	9	13395	Over	5	Lateolabrax_maculatus_GLEAN_10001916
GO:0000096	sulfur amino acid metabolic process	BP	0.0126975	0.128301	1	19	9	13395	Over	5	Lateolabrax_maculatus_GLEAN_10018461
GO:0016702	oxidoreductase activity, acting on single donors with incorporation of molecular oxygen, incorporation of two atoms of oxygen	MF	0.0133618	0.128301	1	20	9	13395	Over	5	Lateolabrax_maculatus_GLEAN_10018461
GO:0097205	renal filtration	BP	0.0199831	0.135369	1	30	9	13395	Over	5	Lateolabrax_maculatus_GLEAN_10002773
GO:0009063	cellular amino acid catabolic process	BP	0.0324546	0.184202	1	49	9	13395	Over	5	Lateolabrax_maculatus_GLEAN_10018461
GO:0007589	body fluid secretion	BP	0.0357131	0.194809	1	54	9	13395	Over	5	Lateolabrax_maculatus_GLEAN_10018461

## Sheet: SW-BW down
GO_ID	GO_Term	GO_Class	Pvalue	AdjustedPv	x1	x2	n	N	EnrichDirect	GOlevl	GeneID
GO:0031224	intrinsic component of membrane	CC	0.0245043	0.300653	9	3110	19	13395	Over	3	Lateolabrax_maculatus_GLEAN_10001321,Lateolabrax_maculatus_GLEAN_10006237,Lateolabrax_maculatus_GLEAN_10007091,Lateolabrax_maculatus_GLEAN_10007205,Lateolabrax_maculatus_GLEAN_10009401,Lateolabrax_maculatus_GLEAN_10010413,Lateolabrax_maculatus_GLEAN_10011194,Lateolabrax_maculatus_GLEAN_10014438,Lateolabrax_maculatus_GLEAN_10017063
GO:0070085	glycosylation	BP	0.0427503	0.339541	2	234	19	13395	Over	3	Lateolabrax_maculatus_GLEAN_10006237,Lateolabrax_maculatus_GLEAN_10007592
GO:0006949	syncytium formation	BP	0.0458151	0.339541	1	33	19	13395	Over	3	Lateolabrax_maculatus_GLEAN_10009641
GO:0140253	cell-cell fusion	BP	0.0458151	0.339541	1	33	19	13395	Over	3	Lateolabrax_maculatus_GLEAN_10009641
GO:0007267	cell-cell signaling	BP	0.0479791	0.347849	4	996	19	13395	Over	3	Lateolabrax_maculatus_GLEAN_10006087,Lateolabrax_maculatus_GLEAN_10008404,Lateolabrax_maculatus_GLEAN_10010413,Lateolabrax_maculatus_GLEAN_10017063
GO:0005794	Golgi apparatus	CC	0.00176192	0.167886	3	173	19	13395	Over	4	Lateolabrax_maculatus_GLEAN_10006237,Lateolabrax_maculatus_GLEAN_10007205,Lateolabrax_maculatus_GLEAN_10011194
GO:0016757	transferase activity, transferring glycosyl groups	MF	0.00504517	0.185687	3	251	19	13395	Over	4	Lateolabrax_maculatus_GLEAN_10006237,Lateolabrax_maculatus_GLEAN_10007592,Lateolabrax_maculatus_GLEAN_10011194
GO:0071214	cellular response to abiotic stimulus	BP	0.00848209	0.185687	1	6	19	13395	Over	4	Lateolabrax_maculatus_GLEAN_10017063
GO:0104004	cellular response to environmental stimulus	BP	0.00848209	0.185687	1	6	19	13395	Over	4	Lateolabrax_maculatus_GLEAN_10017063
GO:0099536	synaptic signaling	BP	0.00985355	0.185687	3	320	19	13395	Over	4	Lateolabrax_maculatus_GLEAN_10006087,Lateolabrax_maculatus_GLEAN_10008404,Lateolabrax_maculatus_GLEAN_10017063
GO:0010171	body morphogenesis	BP	0.0140989	0.223904	1	10	19	13395	Over	4	Lateolabrax_maculatus_GLEAN_10003553
GO:0002437	inflammatory response to antigenic stimulus	BP	0.0182917	0.259587	1	13	19	13395	Over	4	Lateolabrax_maculatus_GLEAN_10017063
GO:0016248	channel inhibitor activity	MF	0.0196856	0.262605	1	14	19	13395	Over	4	Lateolabrax_maculatus_GLEAN_10007205
GO:0001505	regulation of neurotransmitter levels	BP	0.0202397	0.264704	2	156	19	13395	Over	4	Lateolabrax_maculatus_GLEAN_10006087,Lateolabrax_maculatus_GLEAN_10008404
GO:0051231	spindle elongation	BP	0.0238559	0.300653	1	17	19	13395	Over	4	Lateolabrax_maculatus_GLEAN_10006452
GO:0031047	gene silencing by RNA	BP	0.0252422	0.300653	1	18	19	13395	Over	4	Lateolabrax_maculatus_GLEAN_10003553
GO:0099106	ion channel regulator activity	MF	0.0252422	0.300653	1	18	19	13395	Over	4	Lateolabrax_maculatus_GLEAN_10007205
GO:0005548	phospholipid transporter activity	MF	0.0266267	0.306207	1	19	19	13395	Over	4	Lateolabrax_maculatus_GLEAN_10009401
GO:0043413	macromolecule glycosylation	BP	0.0398168	0.339541	2	225	19	13395	Over	4	Lateolabrax_maculatus_GLEAN_10006237,Lateolabrax_maculatus_GLEAN_10007592
GO:0099177	regulation of trans-synaptic signaling	BP	0.0404617	0.339541	2	227	19	13395	Over	4	Lateolabrax_maculatus_GLEAN_10006087,Lateolabrax_maculatus_GLEAN_10017063
GO:0008373	sialyltransferase activity	MF	0.000607068	0.157683	2	26	19	13395	Over	5	Lateolabrax_maculatus_GLEAN_10006237,Lateolabrax_maculatus_GLEAN_10011194
GO:0000139	Golgi membrane	CC	0.000673246	0.157683	3	124	19	13395	Over	5	Lateolabrax_maculatus_GLEAN_10006237,Lateolabrax_maculatus_GLEAN_10007205,Lateolabrax_maculatus_GLEAN_10011194
GO:1903793	positive regulation of anion transport	BP	0.00566233	0.185687	1	4	19	13395	Over	5	Lateolabrax_maculatus_GLEAN_10007205
GO:0047484	regulation of response to osmotic stress	BP	0.00566233	0.185687	1	4	19	13395	Over	5	Lateolabrax_maculatus_GLEAN_10017063
GO:0106049	regulation of cellular response to osmotic stress	BP	0.00566233	0.185687	1	4	19	13395	Over	5	Lateolabrax_maculatus_GLEAN_10017063
GO:2001234	negative regulation of apoptotic signaling pathway	BP	0.00566233	0.185687	1	4	19	13395	Over	5	Lateolabrax_maculatus_GLEAN_10017063
GO:0034330	cell junction organization	BP	0.00643573	0.185687	3	274	19	13395	Over	5	Lateolabrax_maculatus_GLEAN_10006087,Lateolabrax_maculatus_GLEAN_10007091,Lateolabrax_maculatus_GLEAN_10014438
GO:0071470	cellular response to osmotic stress	BP	0.00707316	0.185687	1	5	19	13395	Over	5	Lateolabrax_maculatus_GLEAN_10017063
GO:0015103	inorganic anion transmembrane transporter activity	MF	0.00902385	0.185687	2	102	19	13395	Over	5	Lateolabrax_maculatus_GLEAN_10007205,Lateolabrax_maculatus_GLEAN_10009401
GO:0099537	trans-synaptic signaling	BP	0.00985355	0.185687	3	320	19	13395	Over	5	Lateolabrax_maculatus_GLEAN_10006087,Lateolabrax_maculatus_GLEAN_10008404,Lateolabrax_maculatus_GLEAN_10017063
GO:0009100	glycoprotein metabolic process	BP	0.0100221	0.185687	3	322	19	13395	Over	5	Lateolabrax_maculatus_GLEAN_10006237,Lateolabrax_maculatus_GLEAN_10007592,Lateolabrax_maculatus_GLEAN_10011194
GO:0035194	post-transcriptional gene silencing by RNA	BP	0.0112943	0.203602	1	8	19	13395	Over	5	Lateolabrax_maculatus_GLEAN_10003553
GO:0042136	neurotransmitter biosynthetic process	BP	0.016896	0.259587	1	12	19	13395	Over	5	Lateolabrax_maculatus_GLEAN_10006087
GO:0008200	ion channel inhibitor activity	MF	0.0196856	0.262605	1	14	19	13395	Over	5	Lateolabrax_maculatus_GLEAN_10007205
GO:1901137	carbohydrate derivative biosynthetic process	BP	0.024743	0.300653	3	452	19	13395	Over	5	Lateolabrax_maculatus_GLEAN_10006237,Lateolabrax_maculatus_GLEAN_10007592,Lateolabrax_maculatus_GLEAN_10011194

## Sheet: SW-FW up
GO_ID	GO_Term	GO_Class	Pvalue	AdjustedPv	x1	x2	n	N	EnrichDirect	GOlevl	GeneID
GO:0044281	small molecule metabolic process	BP	0.00621483	0.0982069	8	1292	30	13395	Over	3	Lateolabrax_maculatus_GLEAN_10001619,Lateolabrax_maculatus_GLEAN_10001714,Lateolabrax_maculatus_GLEAN_10008095,Lateolabrax_maculatus_GLEAN_10015953,Lateolabrax_maculatus_GLEAN_10018232,Lateolabrax_maculatus_GLEAN_10018303,Lateolabrax_maculatus_GLEAN_10018461,Lateolabrax_maculatus_GLEAN_10019422
GO:0022857	transmembrane transporter activity	MF	0.0167676	0.14575	5	683	30	13395	Over	3	Lateolabrax_maculatus_GLEAN_10006288,Lateolabrax_maculatus_GLEAN_10009623,Lateolabrax_maculatus_GLEAN_10015172,Lateolabrax_maculatus_GLEAN_10016275,Lateolabrax_maculatus_GLEAN_10019187
GO:0038201	TOR complex	CC	0.0221794	0.163962	1	10	30	13395	Over	3	Lateolabrax_maculatus_GLEAN_10001619
GO:0030427	site of polarized growth	CC	0.0374213	0.208452	1	17	30	13395	Over	3	Lateolabrax_maculatus_GLEAN_10009623
GO:0150034	distal axon	CC	0.0374213	0.208452	1	17	30	13395	Over	3	Lateolabrax_maculatus_GLEAN_10009623
GO:0009056	catabolic process	BP	0.0422947	0.214163	6	1170	30	13395	Over	3	Lateolabrax_maculatus_GLEAN_10001619,Lateolabrax_maculatus_GLEAN_10008095,Lateolabrax_maculatus_GLEAN_10018114,Lateolabrax_maculatus_GLEAN_10018232,Lateolabrax_maculatus_GLEAN_10018461,Lateolabrax_maculatus_GLEAN_10019422
GO:0061919	process utilizing autophagic mechanism	BP	0.0446964	0.214163	2	151	30	13395	Over	3	Lateolabrax_maculatus_GLEAN_10001619,Lateolabrax_maculatus_GLEAN_10019422
GO:2001024	negative regulation of response to drug	BP	0.00447443	0.0845906	1	2	30	13395	Over	4	Lateolabrax_maculatus_GLEAN_10001619
GO:2001038	regulation of cellular response to drug	BP	0.00447443	0.0845906	1	2	30	13395	Over	4	Lateolabrax_maculatus_GLEAN_10001619
GO:2001039	negative regulation of cellular response to drug	BP	0.00447443	0.0845906	1	2	30	13395	Over	4	Lateolabrax_maculatus_GLEAN_10001619
GO:0044282	small molecule catabolic process	BP	0.00456142	0.0845906	3	151	30	13395	Over	4	Lateolabrax_maculatus_GLEAN_10001619,Lateolabrax_maculatus_GLEAN_10018232,Lateolabrax_maculatus_GLEAN_10018461
GO:1900038	negative regulation of cellular response to hypoxia	BP	0.00670439	0.0982069	1	3	30	13395	Over	4	Lateolabrax_maculatus_GLEAN_10001619
GO:0062012	regulation of small molecule metabolic process	BP	0.00848253	0.107019	3	189	30	13395	Over	4	Lateolabrax_maculatus_GLEAN_10001619,Lateolabrax_maculatus_GLEAN_10008095,Lateolabrax_maculatus_GLEAN_10019422
GO:0042161	lipoprotein oxidation	BP	0.00892951	0.107019	1	4	30	13395	Over	4	Lateolabrax_maculatus_GLEAN_10015953
GO:0036473	cell death in response to oxidative stress	BP	0.015576	0.136896	1	7	30	13395	Over	4	Lateolabrax_maculatus_GLEAN_10001619
GO:0001539	cilium or flagellum-dependent cell motility	BP	0.0221794	0.163962	1	10	30	13395	Over	4	Lateolabrax_maculatus_GLEAN_10012904
GO:0042887	amide transmembrane transporter activity	MF	0.024371	0.164765	1	11	30	13395	Over	4	Lateolabrax_maculatus_GLEAN_10016275
GO:0006805	xenobiotic metabolic process	BP	0.024371	0.164765	1	11	30	13395	Over	4	Lateolabrax_maculatus_GLEAN_10018461
GO:0015318	inorganic molecular entity transmembrane transporter activity	MF	0.0269728	0.176326	4	516	30	13395	Over	4	Lateolabrax_maculatus_GLEAN_10006288,Lateolabrax_maculatus_GLEAN_10009623,Lateolabrax_maculatus_GLEAN_10015172,Lateolabrax_maculatus_GLEAN_10019187
GO:0003014	renal system process	BP	0.0312328	0.196072	2	124	30	13395	Over	4	Lateolabrax_maculatus_GLEAN_10002773,Lateolabrax_maculatus_GLEAN_10006288
GO:0030426	growth cone	CC	0.035258	0.205067	1	16	30	13395	Over	4	Lateolabrax_maculatus_GLEAN_10009623
GO:0051231	spindle elongation	BP	0.0374213	0.208452	1	17	30	13395	Over	4	Lateolabrax_maculatus_GLEAN_10018114
GO:0044273	sulfur compound catabolic process	BP	1.45272e-05	0.00383034	2	3	30	13395	Over	5	Lateolabrax_maculatus_GLEAN_10018232,Lateolabrax_maculatus_GLEAN_10018461
GO:0006140	regulation of nucleotide metabolic process	BP	0.000126195	0.0166368	3	44	30	13395	Over	5	Lateolabrax_maculatus_GLEAN_10001619,Lateolabrax_maculatus_GLEAN_10008095,Lateolabrax_maculatus_GLEAN_10019422
GO:0000096	sulfur amino acid metabolic process	BP	0.000809794	0.0751206	2	19	30	13395	Over	5	Lateolabrax_maculatus_GLEAN_10018232,Lateolabrax_maculatus_GLEAN_10018461
GO:0051881	regulation of mitochondrial membrane potential	BP	0.00223964	0.0845906	1	1	30	13395	Over	5	Lateolabrax_maculatus_GLEAN_10019422
GO:0036474	cell death in response to hydrogen peroxide	BP	0.00447443	0.0845906	1	2	30	13395	Over	5	Lateolabrax_maculatus_GLEAN_10001619
GO:0036475	neuron death in response to oxidative stress	BP	0.00447443	0.0845906	1	2	30	13395	Over	5	Lateolabrax_maculatus_GLEAN_10001619
GO:0042542	response to hydrogen peroxide	BP	0.00447443	0.0845906	1	2	30	13395	Over	5	Lateolabrax_maculatus_GLEAN_10001619
GO:0071236	cellular response to antibiotic	BP	0.00447443	0.0845906	1	2	30	13395	Over	5	Lateolabrax_maculatus_GLEAN_10001619
GO:1901032	negative regulation of response to reactive oxygen species	BP	0.00447443	0.0845906	1	2	30	13395	Over	5	Lateolabrax_maculatus_GLEAN_10001619
GO:1903205	regulation of hydrogen peroxide-induced cell death	BP	0.00447443	0.0845906	1	2	30	13395	Over	5	Lateolabrax_maculatus_GLEAN_10001619
GO:1903206	negative regulation of hydrogen peroxide-induced cell death	BP	0.00447443	0.0845906	1	2	30	13395	Over	5	Lateolabrax_maculatus_GLEAN_10001619
GO:0000422	autophagy of mitochondrion	BP	0.00447443	0.0845906	1	2	30	13395	Over	5	Lateolabrax_maculatus_GLEAN_10019422
GO:0009116	nucleoside metabolic process	BP	0.00472088	0.0848686	2	46	30	13395	Over	5	Lateolabrax_maculatus_GLEAN_10001619,Lateolabrax_maculatus_GLEAN_10019422
GO:0009063	cellular amino acid catabolic process	BP	0.00534174	0.0933967	2	49	30	13395	Over	5	Lateolabrax_maculatus_GLEAN_10018232,Lateolabrax_maculatus_GLEAN_10018461
GO:1901657	glycosyl compound metabolic process	BP	0.0055566	0.0935165	2	50	30	13395	Over	5	Lateolabrax_maculatus_GLEAN_10001619,Lateolabrax_maculatus_GLEAN_10019422

## Sheet: SW-FW down
GO_ID	GO_Term	GO_Class	Pvalue	AdjustedPv	x1	x2	n	N	EnrichDirect	GOlevl	GeneID
GO:0051234	establishment of localization	BP	0.00086657	0.0687841	22	3103	50	13395	Over	3	Lateolabrax_maculatus_GLEAN_10000518,Lateolabrax_maculatus_GLEAN_10002819,Lateolabrax_maculatus_GLEAN_10003364,Lateolabrax_maculatus_GLEAN_10004522,Lateolabrax_maculatus_GLEAN_10005245,Lateolabrax_maculatus_GLEAN_10006049,Lateolabrax_maculatus_GLEAN_10007205,Lateolabrax_maculatus_GLEAN_10008404,Lateolabrax_maculatus_GLEAN_10008675,Lateolabrax_maculatus_GLEAN_10009366,Lateolabrax_maculatus_GLEAN_1…
GO:0048585	negative regulation of response to stimulus	BP	0.00450549	0.141725	7	560	50	13395	Over	3	Lateolabrax_maculatus_GLEAN_10000518,Lateolabrax_maculatus_GLEAN_10002819,Lateolabrax_maculatus_GLEAN_10005449,Lateolabrax_maculatus_GLEAN_10008675,Lateolabrax_maculatus_GLEAN_10017062,Lateolabrax_maculatus_GLEAN_10017063,Lateolabrax_maculatus_GLEAN_10017064
GO:0051050	positive regulation of transport	BP	0.0047201	0.141725	5	295	50	13395	Over	3	Lateolabrax_maculatus_GLEAN_10002819,Lateolabrax_maculatus_GLEAN_10005245,Lateolabrax_maculatus_GLEAN_10006049,Lateolabrax_maculatus_GLEAN_10007205,Lateolabrax_maculatus_GLEAN_10015591
GO:0023057	negative regulation of signaling	BP	0.00485914	0.141725	6	426	50	13395	Over	3	Lateolabrax_maculatus_GLEAN_10000518,Lateolabrax_maculatus_GLEAN_10005449,Lateolabrax_maculatus_GLEAN_10008675,Lateolabrax_maculatus_GLEAN_10017062,Lateolabrax_maculatus_GLEAN_10017063,Lateolabrax_maculatus_GLEAN_10017064
GO:0038023	signaling receptor activity	MF	0.00570418	0.15528	8	740	50	13395	Over	3	Lateolabrax_maculatus_GLEAN_10005245,Lateolabrax_maculatus_GLEAN_10006049,Lateolabrax_maculatus_GLEAN_10012495,Lateolabrax_maculatus_GLEAN_10013752,Lateolabrax_maculatus_GLEAN_10015591,Lateolabrax_maculatus_GLEAN_10017062,Lateolabrax_maculatus_GLEAN_10017063,Lateolabrax_maculatus_GLEAN_10017064
GO:0140352	export from cell	BP	0.00632193	0.158631	6	450	50	13395	Over	3	Lateolabrax_maculatus_GLEAN_10002819,Lateolabrax_maculatus_GLEAN_10006049,Lateolabrax_maculatus_GLEAN_10008404,Lateolabrax_maculatus_GLEAN_10008675,Lateolabrax_maculatus_GLEAN_10015591,Lateolabrax_maculatus_GLEAN_10017728
GO:0065008	regulation of biological quality	BP	0.0066061	0.158631	16	2237	50	13395	Over	3	Lateolabrax_maculatus_GLEAN_10002819,Lateolabrax_maculatus_GLEAN_10003722,Lateolabrax_maculatus_GLEAN_10005245,Lateolabrax_maculatus_GLEAN_10005841,Lateolabrax_maculatus_GLEAN_10006049,Lateolabrax_maculatus_GLEAN_10007205,Lateolabrax_maculatus_GLEAN_10008404,Lateolabrax_maculatus_GLEAN_10010477,Lateolabrax_maculatus_GLEAN_10012420,Lateolabrax_maculatus_GLEAN_10013677,Lateolabrax_maculatus_GLEAN_1…
GO:0022857	transmembrane transporter activity	MF	0.0128528	0.207166	7	683	50	13395	Over	3	Lateolabrax_maculatus_GLEAN_10003364,Lateolabrax_maculatus_GLEAN_10007205,Lateolabrax_maculatus_GLEAN_10009366,Lateolabrax_maculatus_GLEAN_10010477,Lateolabrax_maculatus_GLEAN_10012420,Lateolabrax_maculatus_GLEAN_10012495,Lateolabrax_maculatus_GLEAN_10013677
GO:1904951	positive regulation of establishment of protein localization	BP	0.013807	0.212807	2	48	50	13395	Over	3	Lateolabrax_maculatus_GLEAN_10002819,Lateolabrax_maculatus_GLEAN_10015591
GO:0035821	modulation of process of other organism	BP	0.018497	0.233983	2	56	50	13395	Over	3	Lateolabrax_maculatus_GLEAN_10002819,Lateolabrax_maculatus_GLEAN_10005245
GO:0009628	response to abiotic stimulus	BP	0.0212041	0.24976	7	755	50	13395	Over	3	Lateolabrax_maculatus_GLEAN_10008675,Lateolabrax_maculatus_GLEAN_10012420,Lateolabrax_maculatus_GLEAN_10013677,Lateolabrax_maculatus_GLEAN_10015591,Lateolabrax_maculatus_GLEAN_10017062,Lateolabrax_maculatus_GLEAN_10017063,Lateolabrax_maculatus_GLEAN_10017064
GO:0099080	supramolecular complex	CC	0.0235645	0.267128	5	440	50	13395	Over	3	Lateolabrax_maculatus_GLEAN_10003159,Lateolabrax_maculatus_GLEAN_10005841,Lateolabrax_maculatus_GLEAN_10008675,Lateolabrax_maculatus_GLEAN_10010251,Lateolabrax_maculatus_GLEAN_10017728
GO:0007267	cell-cell signaling	BP	0.0299661	0.296036	8	996	50	13395	Over	3	Lateolabrax_maculatus_GLEAN_10002819,Lateolabrax_maculatus_GLEAN_10003722,Lateolabrax_maculatus_GLEAN_10005449,Lateolabrax_maculatus_GLEAN_10006049,Lateolabrax_maculatus_GLEAN_10008404,Lateolabrax_maculatus_GLEAN_10009366,Lateolabrax_maculatus_GLEAN_10015591,Lateolabrax_maculatus_GLEAN_10017063
GO:0003823	antigen binding	MF	0.0331071	0.309589	1	9	50	13395	Over	3	Lateolabrax_maculatus_GLEAN_10021486
GO:0034518	RNA cap binding complex	CC	0.0367187	0.316763	1	10	50	13395	Over	3	Lateolabrax_maculatus_GLEAN_10005841
GO:0071214	cellular response to abiotic stimulus	BP	9.7112e-07	0.000118962	3	6	50	13395	Over	4	Lateolabrax_maculatus_GLEAN_10017062,Lateolabrax_maculatus_GLEAN_10017063,Lateolabrax_maculatus_GLEAN_10017064
GO:0104004	cellular response to environmental stimulus	BP	9.7112e-07	0.000118962	3	6	50	13395	Over	4	Lateolabrax_maculatus_GLEAN_10017062,Lateolabrax_maculatus_GLEAN_10017063,Lateolabrax_maculatus_GLEAN_10017064
GO:0006970	response to osmotic stress	BP	1.10196e-06	0.000122718	5	50	50	13395	Over	4	Lateolabrax_maculatus_GLEAN_10012420,Lateolabrax_maculatus_GLEAN_10013677,Lateolabrax_maculatus_GLEAN_10017062,Lateolabrax_maculatus_GLEAN_10017063,Lateolabrax_maculatus_GLEAN_10017064
GO:0002437	inflammatory response to antigenic stimulus	BP	1.36333e-05	0.00139174	3	13	50	13395	Over	4	Lateolabrax_maculatus_GLEAN_10017062,Lateolabrax_maculatus_GLEAN_10017063,Lateolabrax_maculatus_GLEAN_10017064
GO:0022804	active transmembrane transporter activity	MF	0.0012226	0.0788252	5	216	50	13395	Over	4	Lateolabrax_maculatus_GLEAN_10003364,Lateolabrax_maculatus_GLEAN_10007205,Lateolabrax_maculatus_GLEAN_10009366,Lateolabrax_maculatus_GLEAN_10012420,Lateolabrax_maculatus_GLEAN_10013677
GO:0004888	transmembrane signaling receptor activity	MF	0.00165592	0.101425	8	605	50	13395	Over	4	Lateolabrax_maculatus_GLEAN_10005245,Lateolabrax_maculatus_GLEAN_10006049,Lateolabrax_maculatus_GLEAN_10012495,Lateolabrax_maculatus_GLEAN_10013752,Lateolabrax_maculatus_GLEAN_10015591,Lateolabrax_maculatus_GLEAN_10017062,Lateolabrax_maculatus_GLEAN_10017063,Lateolabrax_maculatus_GLEAN_10017064
GO:0006810	transport	BP	0.00267664	0.12918	20	2889	50	13395	Over	4	Lateolabrax_maculatus_GLEAN_10000518,Lateolabrax_maculatus_GLEAN_10002819,Lateolabrax_maculatus_GLEAN_10004522,Lateolabrax_maculatus_GLEAN_10005245,Lateolabrax_maculatus_GLEAN_10006049,Lateolabrax_maculatus_GLEAN_10007205,Lateolabrax_maculatus_GLEAN_10008404,Lateolabrax_maculatus_GLEAN_10008675,Lateolabrax_maculatus_GLEAN_10009366,Lateolabrax_maculatus_GLEAN_10009904,Lateolabrax_maculatus_GLEAN_1…
GO:0046887	positive regulation of hormone secretion	BP	0.00274054	0.12918	2	21	50	13395	Over	4	Lateolabrax_maculatus_GLEAN_10006049,Lateolabrax_maculatus_GLEAN_10015591
GO:0009968	negative regulation of signal transduction	BP	0.00389217	0.132442	6	407	50	13395	Over	4	Lateolabrax_maculatus_GLEAN_10000518,Lateolabrax_maculatus_GLEAN_10005449,Lateolabrax_maculatus_GLEAN_10008675,Lateolabrax_maculatus_GLEAN_10017062,Lateolabrax_maculatus_GLEAN_10017063,Lateolabrax_maculatus_GLEAN_10017064
GO:0036464	cytoplasmic ribonucleoprotein granule	CC	0.00402889	0.133389	3	86	50	13395	Over	4	Lateolabrax_maculatus_GLEAN_10003159,Lateolabrax_maculatus_GLEAN_10005841,Lateolabrax_maculatus_GLEAN_10008675
GO:0010648	negative regulation of cell communication	BP	0.00612336	0.158631	6	447	50	13395	Over	4	Lateolabrax_maculatus_GLEAN_10000518,Lateolabrax_maculatus_GLEAN_10005449,Lateolabrax_maculatus_GLEAN_10008675,Lateolabrax_maculatus_GLEAN_10017062,Lateolabrax_maculatus_GLEAN_10017063,Lateolabrax_maculatus_GLEAN_10017064
GO:0032940	secretion by cell	BP	0.00632193	0.158631	6	450	50	13395	Over	4	Lateolabrax_maculatus_GLEAN_10002819,Lateolabrax_maculatus_GLEAN_10006049,Lateolabrax_maculatus_GLEAN_10008404,Lateolabrax_maculatus_GLEAN_10008675,Lateolabrax_maculatus_GLEAN_10015591,Lateolabrax_maculatus_GLEAN_10017728
GO:0001666	response to hypoxia	BP	0.00739786	0.158631	3	107	50	13395	Over	4	Lateolabrax_maculatus_GLEAN_10017062,Lateolabrax_maculatus_GLEAN_10017063,Lateolabrax_maculatus_GLEAN_10017064
GO:0032278	positive regulation of gonadotropin secretion	BP	0.00745182	0.158631	1	2	50	13395	Over	4	Lateolabrax_maculatus_GLEAN_10006049
GO:1903532	positive regulation of secretion by cell	BP	0.00751071	0.158631	2	35	50	13395	Over	4	Lateolabrax_maculatus_GLEAN_10006049,Lateolabrax_maculatus_GLEAN_10015591
GO:0047484	regulation of response to osmotic stress	BP	1.9525e-07	3.41688e-05	3	4	50	13395	Over	5	Lateolabrax_maculatus_GLEAN_10017062,Lateolabrax_maculatus_GLEAN_10017063,Lateolabrax_maculatus_GLEAN_10017064
GO:0106049	regulation of cellular response to osmotic stress	BP	1.9525e-07	3.41688e-05	3	4	50	13395	Over	5	Lateolabrax_maculatus_GLEAN_10017062,Lateolabrax_maculatus_GLEAN_10017063,Lateolabrax_maculatus_GLEAN_10017064
GO:2001234	negative regulation of apoptotic signaling pathway	BP	1.9525e-07	3.41688e-05	3	4	50	13395	Over	5	Lateolabrax_maculatus_GLEAN_10017062,Lateolabrax_maculatus_GLEAN_10017063,Lateolabrax_maculatus_GLEAN_10017064
GO:0071470	cellular response to osmotic stress	BP	4.86841e-07	7.45476e-05	3	5	50	13395	Over	5	Lateolabrax_maculatus_GLEAN_10017062,Lateolabrax_maculatus_GLEAN_10017063,Lateolabrax_maculatus_GLEAN_10017064
GO:0003779	actin binding	MF	0.000437314	0.038265	5	172	50	13395	Over	5	Lateolabrax_maculatus_GLEAN_10003257,Lateolabrax_maculatus_GLEAN_10004522,Lateolabrax_maculatus_GLEAN_10012578,Lateolabrax_maculatus_GLEAN_10017364,Lateolabrax_maculatus_GLEAN_10017728
GO:0046903	secretion	BP	0.00111922	0.0761693	8	569	50	13395	Over	5	Lateolabrax_maculatus_GLEAN_10002819,Lateolabrax_maculatus_GLEAN_10006049,Lateolabrax_maculatus_GLEAN_10008404,Lateolabrax_maculatus_GLEAN_10008675,Lateolabrax_maculatus_GLEAN_10015591,Lateolabrax_maculatus_GLEAN_10017063,Lateolabrax_maculatus_GLEAN_10017064,Lateolabrax_maculatus_GLEAN_10017728
GO:0019048	modulation by virus of host process	BP	0.00274054	0.12918	2	21	50	13395	Over	5	Lateolabrax_maculatus_GLEAN_10002819,Lateolabrax_maculatus_GLEAN_10005245
GO:0044003	modulation by symbiont of host process	BP	0.00274054	0.12918	2	21	50	13395	Over	5	Lateolabrax_maculatus_GLEAN_10002819,Lateolabrax_maculatus_GLEAN_10005245
GO:0015291	secondary active transmembrane transporter activity	MF	0.00294568	0.12918	4	160	50	13395	Over	5	Lateolabrax_maculatus_GLEAN_10003364,Lateolabrax_maculatus_GLEAN_10009366,Lateolabrax_maculatus_GLEAN_10012420,Lateolabrax_maculatus_GLEAN_10013677
GO:0062197	cellular response to chemical stress	BP	0.00305814	0.12918	3	78	50	13395	Over	5	Lateolabrax_maculatus_GLEAN_10017062,Lateolabrax_maculatus_GLEAN_10017063,Lateolabrax_maculatus_GLEAN_10017064
GO:1902532	negative regulation of intracellular signal transduction	BP	0.00340297	0.130646	3	81	50	13395	Over	5	Lateolabrax_maculatus_GLEAN_10017062,Lateolabrax_maculatus_GLEAN_10017063,Lateolabrax_maculatus_GLEAN_10017064
GO:0006954	inflammatory response	BP	0.00564028	0.15528	3	97	50	13395	Over	5	Lateolabrax_maculatus_GLEAN_10017062,Lateolabrax_maculatus_GLEAN_10017063,Lateolabrax_maculatus_GLEAN_10017064
GO:0016298	lipase activity	MF	0.00648336	0.158631	3	102	50	13395	Over	5	Lateolabrax_maculatus_GLEAN_10003722,Lateolabrax_maculatus_GLEAN_10017063,Lateolabrax_maculatus_GLEAN_10017064
GO:0006811	ion transport	BP	0.0065249	0.158631	10	1097	50	13395	Over	5	Lateolabrax_maculatus_GLEAN_10007205,Lateolabrax_maculatus_GLEAN_10009366,Lateolabrax_maculatus_GLEAN_10010477,Lateolabrax_maculatus_GLEAN_10012420,Lateolabrax_maculatus_GLEAN_10012495,Lateolabrax_maculatus_GLEAN_10013677,Lateolabrax_maculatus_GLEAN_10013752,Lateolabrax_maculatus_GLEAN_10017063,Lateolabrax_maculatus_GLEAN_10017064,Lateolabrax_maculatus_GLEAN_10017728
GO:2001233	regulation of apoptotic signaling pathway	BP	0.00720918	0.158631	3	106	50	13395	Over	5	Lateolabrax_maculatus_GLEAN_10017062,Lateolabrax_maculatus_GLEAN_10017063,Lateolabrax_maculatus_GLEAN_10017064
