# Supplementary material for: Transcriptomic Modulation Reveals the Specific Cellular Response in Chinese Sea Bass (Lateolabrax maculatus) Gills under Salinity Change and Alkalinity Stress
Source: Int J Mol Sci. 2023 Mar 20;24(6):5877. doi: 10.3390/ijms24065877 (PMC10056482; doi:10.3390/ijms24065877)
Supplement: Supplementary file 1 [file ijms-24-05877-s001.zip › Table S2.Combined DEG GO-1.5-top15.xlsx]

## Sheet: alk-up-only
GO_ID	GO_Term	GO_Class	Pvalue	AdjustedPv	x1	x2	n	N	EnrichDirect	GOlevl	GeneID
GO:0031012	extracellular matrix	CC	2.67754e-22	3.78605e-19	27	178	382	13395	Over	3	Lateolabrax_maculatus_GLEAN_10016474,Lateolabrax_maculatus_GLEAN_10007977,Lateolabrax_maculatus_GLEAN_10011673,Lateolabrax_maculatus_GLEAN_10005217,Lateolabrax_maculatus_GLEAN_10020950,Lateolabrax_maculatus_GLEAN_10016318,Lateolabrax_maculatus_GLEAN_10007863,Lateolabrax_maculatus_GLEAN_10005954,Lateolabrax_maculatus_GLEAN_10013553,Lateolabrax_maculatus_GLEAN_10000953,Lateolabrax_maculatus_GLEAN_1…
GO:0005576	extracellular region	CC	5.68598e-19	5.35998e-16	32	266	382	13395	Over	3	Lateolabrax_maculatus_GLEAN_10016474,Lateolabrax_maculatus_GLEAN_10007977,Lateolabrax_maculatus_GLEAN_10011673,Lateolabrax_maculatus_GLEAN_10005217,Lateolabrax_maculatus_GLEAN_10020950,Lateolabrax_maculatus_GLEAN_10016318,Lateolabrax_maculatus_GLEAN_10007863,Lateolabrax_maculatus_GLEAN_10005954,Lateolabrax_maculatus_GLEAN_10003248,Lateolabrax_maculatus_GLEAN_10013553,Lateolabrax_maculatus_GLEAN_1…
GO:0009653	anatomical structure morphogenesis	BP	8.88862e-18	6.28426e-15	140	2598	382	13395	Over	3	Lateolabrax_maculatus_GLEAN_10009155,Lateolabrax_maculatus_GLEAN_10012392,Lateolabrax_maculatus_GLEAN_10016474,Lateolabrax_maculatus_GLEAN_10015306,Lateolabrax_maculatus_GLEAN_10006571,Lateolabrax_maculatus_GLEAN_10011121,Lateolabrax_maculatus_GLEAN_10013871,Lateolabrax_maculatus_GLEAN_10004484,Lateolabrax_maculatus_GLEAN_10012914,Lateolabrax_maculatus_GLEAN_10007383,Lateolabrax_maculatus_GLEAN_1…
GO:0048856	anatomical structure development	BP	8.76544e-16	4.13145e-13	206	4623	382	13395	Over	3	Lateolabrax_maculatus_GLEAN_10008879,Lateolabrax_maculatus_GLEAN_10009155,Lateolabrax_maculatus_GLEAN_10016971,Lateolabrax_maculatus_GLEAN_10018895,Lateolabrax_maculatus_GLEAN_10012392,Lateolabrax_maculatus_GLEAN_10016474,Lateolabrax_maculatus_GLEAN_10015306,Lateolabrax_maculatus_GLEAN_10006571,Lateolabrax_maculatus_GLEAN_10011121,Lateolabrax_maculatus_GLEAN_10013871,Lateolabrax_maculatus_GLEAN_1…
GO:0007275	multicellular organism development	BP	8.47803e-14	2.66399e-11	178	3929	382	13395	Over	3	Lateolabrax_maculatus_GLEAN_10008879,Lateolabrax_maculatus_GLEAN_10009155,Lateolabrax_maculatus_GLEAN_10016971,Lateolabrax_maculatus_GLEAN_10018895,Lateolabrax_maculatus_GLEAN_10016474,Lateolabrax_maculatus_GLEAN_10015306,Lateolabrax_maculatus_GLEAN_10006571,Lateolabrax_maculatus_GLEAN_10011121,Lateolabrax_maculatus_GLEAN_10013871,Lateolabrax_maculatus_GLEAN_10004484,Lateolabrax_maculatus_GLEAN_1…
GO:0007155	cell adhesion	BP	1.98765e-12	5.11006e-10	46	.	382	13395	Over	3	Lateolabrax_maculatus_GLEAN_10006571,Lateolabrax_maculatus_GLEAN_10011673,Lateolabrax_maculatus_GLEAN_10001739,Lateolabrax_maculatus_GLEAN_10012914,Lateolabrax_maculatus_GLEAN_10001506,Lateolabrax_maculatus_GLEAN_10019870,Lateolabrax_maculatus_GLEAN_10011759,Lateolabrax_maculatus_GLEAN_10014593,Lateolabrax_maculatus_GLEAN_10008462,Lateolabrax_maculatus_GLEAN_10001982,Lateolabrax_maculatus_GLEAN_1…
GO:0048869	cellular developmental process	BP	1.58161e-09	1.54234e-07	141	3190	382	13395	Over	3	Lateolabrax_maculatus_GLEAN_10009155,Lateolabrax_maculatus_GLEAN_10016971,Lateolabrax_maculatus_GLEAN_10018895,Lateolabrax_maculatus_GLEAN_10012392,Lateolabrax_maculatus_GLEAN_10015306,Lateolabrax_maculatus_GLEAN_10007977,Lateolabrax_maculatus_GLEAN_10011121,Lateolabrax_maculatus_GLEAN_10013871,Lateolabrax_maculatus_GLEAN_10004484,Lateolabrax_maculatus_GLEAN_10012914,Lateolabrax_maculatus_GLEAN_1…
GO:0006928	movement of cell or subcellular component	BP	1.68483e-09	1.58824e-07	83	1580	382	13395	Over	3	Lateolabrax_maculatus_GLEAN_10009155,Lateolabrax_maculatus_GLEAN_10018895,Lateolabrax_maculatus_GLEAN_10015306,Lateolabrax_maculatus_GLEAN_10011121,Lateolabrax_maculatus_GLEAN_10012914,Lateolabrax_maculatus_GLEAN_10011202,Lateolabrax_maculatus_GLEAN_10019870,Lateolabrax_maculatus_GLEAN_10011759,Lateolabrax_maculatus_GLEAN_10014593,Lateolabrax_maculatus_GLEAN_10005953,Lateolabrax_maculatus_GLEAN_1…
GO:0042330	taxis	BP	6.66514e-09	5.38544e-07	41	606	382	13395	Over	3	Lateolabrax_maculatus_GLEAN_10009155,Lateolabrax_maculatus_GLEAN_10015306,Lateolabrax_maculatus_GLEAN_10011121,Lateolabrax_maculatus_GLEAN_10011202,Lateolabrax_maculatus_GLEAN_10011759,Lateolabrax_maculatus_GLEAN_10003893,Lateolabrax_maculatus_GLEAN_10016876,Lateolabrax_maculatus_GLEAN_10016318,Lateolabrax_maculatus_GLEAN_10011596,Lateolabrax_maculatus_GLEAN_10018218,Lateolabrax_maculatus_GLEAN_1…
GO:0048870	cell motility	BP	8.33775e-09	6.37274e-07	65	1165	382	13395	Over	3	Lateolabrax_maculatus_GLEAN_10009155,Lateolabrax_maculatus_GLEAN_10018895,Lateolabrax_maculatus_GLEAN_10015306,Lateolabrax_maculatus_GLEAN_10012914,Lateolabrax_maculatus_GLEAN_10019870,Lateolabrax_maculatus_GLEAN_10011759,Lateolabrax_maculatus_GLEAN_10014593,Lateolabrax_maculatus_GLEAN_10005953,Lateolabrax_maculatus_GLEAN_10007879,Lateolabrax_maculatus_GLEAN_10003893,Lateolabrax_maculatus_GLEAN_1…
GO:0051674	localization of cell	BP	8.33775e-09	6.37274e-07	65	1165	382	13395	Over	3	Lateolabrax_maculatus_GLEAN_10009155,Lateolabrax_maculatus_GLEAN_10018895,Lateolabrax_maculatus_GLEAN_10015306,Lateolabrax_maculatus_GLEAN_10012914,Lateolabrax_maculatus_GLEAN_10019870,Lateolabrax_maculatus_GLEAN_10011759,Lateolabrax_maculatus_GLEAN_10014593,Lateolabrax_maculatus_GLEAN_10005953,Lateolabrax_maculatus_GLEAN_10007879,Lateolabrax_maculatus_GLEAN_10003893,Lateolabrax_maculatus_GLEAN_1…
GO:0050793	regulation of developmental process	BP	1.80608e-07	1.00149e-05	81	1661	382	13395	Over	3	Lateolabrax_maculatus_GLEAN_10009155,Lateolabrax_maculatus_GLEAN_10016474,Lateolabrax_maculatus_GLEAN_10015306,Lateolabrax_maculatus_GLEAN_10007977,Lateolabrax_maculatus_GLEAN_10011121,Lateolabrax_maculatus_GLEAN_10013871,Lateolabrax_maculatus_GLEAN_10012914,Lateolabrax_maculatus_GLEAN_10007383,Lateolabrax_maculatus_GLEAN_10005386,Lateolabrax_maculatus_GLEAN_10007135,Lateolabrax_maculatus_GLEAN_1…
GO:0051239	regulation of multicellular organismal process	BP	2.32026e-07	1.23805e-05	81	1669	382	13395	Over	3	Lateolabrax_maculatus_GLEAN_10008879,Lateolabrax_maculatus_GLEAN_10009155,Lateolabrax_maculatus_GLEAN_10016474,Lateolabrax_maculatus_GLEAN_10015306,Lateolabrax_maculatus_GLEAN_10011121,Lateolabrax_maculatus_GLEAN_10013871,Lateolabrax_maculatus_GLEAN_10005386,Lateolabrax_maculatus_GLEAN_10011202,Lateolabrax_maculatus_GLEAN_10019870,Lateolabrax_maculatus_GLEAN_10011759,Lateolabrax_maculatus_GLEAN_1…
GO:0071840	cellular component organization or biogenesis	BP	1.10837e-05	0.000377646	158	4150	382	13395	Over	3	Lateolabrax_maculatus_GLEAN_10009155,Lateolabrax_maculatus_GLEAN_10015246,Lateolabrax_maculatus_GLEAN_10016971,Lateolabrax_maculatus_GLEAN_10018895,Lateolabrax_maculatus_GLEAN_10016474,Lateolabrax_maculatus_GLEAN_10015306,Lateolabrax_maculatus_GLEAN_10007977,Lateolabrax_maculatus_GLEAN_10011121,Lateolabrax_maculatus_GLEAN_10013871,Lateolabrax_maculatus_GLEAN_10011673,Lateolabrax_maculatus_GLEAN_1…
GO:0050794	regulation of cellular process	BP	1.42792e-05	0.000469553	232	6652	382	13395	Over	3	Lateolabrax_maculatus_GLEAN_10008879,Lateolabrax_maculatus_GLEAN_10009155,Lateolabrax_maculatus_GLEAN_10015246,Lateolabrax_maculatus_GLEAN_10016441,Lateolabrax_maculatus_GLEAN_10018325,Lateolabrax_maculatus_GLEAN_10017358,Lateolabrax_maculatus_GLEAN_10016971,Lateolabrax_maculatus_GLEAN_10018895,Lateolabrax_maculatus_GLEAN_10016474,Lateolabrax_maculatus_GLEAN_10015306,Lateolabrax_maculatus_GLEAN_1…
GO:0031589	cell-substrate adhesion	BP	8.22588e-14	2.66399e-11	23	191	382	13395	Over	4	Lateolabrax_maculatus_GLEAN_10011673,Lateolabrax_maculatus_GLEAN_10019870,Lateolabrax_maculatus_GLEAN_10011759,Lateolabrax_maculatus_GLEAN_10014593,Lateolabrax_maculatus_GLEAN_10007063,Lateolabrax_maculatus_GLEAN_10017044,Lateolabrax_maculatus_GLEAN_10013999,Lateolabrax_maculatus_GLEAN_10010117,Lateolabrax_maculatus_GLEAN_10017576,Lateolabrax_maculatus_GLEAN_10013650,Lateolabrax_maculatus_GLEAN_1…
GO:0048731	system development	BP	1.08175e-12	3.0592e-10	162	3542	382	13395	Over	4	Lateolabrax_maculatus_GLEAN_10008879,Lateolabrax_maculatus_GLEAN_10009155,Lateolabrax_maculatus_GLEAN_10016971,Lateolabrax_maculatus_GLEAN_10018895,Lateolabrax_maculatus_GLEAN_10016474,Lateolabrax_maculatus_GLEAN_10015306,Lateolabrax_maculatus_GLEAN_10006571,Lateolabrax_maculatus_GLEAN_10011121,Lateolabrax_maculatus_GLEAN_10012914,Lateolabrax_maculatus_GLEAN_10013204,Lateolabrax_maculatus_GLEAN_1…
GO:0032989	cellular component morphogenesis	BP	2.76007e-11	5.20365e-09	59	916	382	13395	Over	4	Lateolabrax_maculatus_GLEAN_10015306,Lateolabrax_maculatus_GLEAN_10011121,Lateolabrax_maculatus_GLEAN_10013871,Lateolabrax_maculatus_GLEAN_10012914,Lateolabrax_maculatus_GLEAN_10011202,Lateolabrax_maculatus_GLEAN_10011759,Lateolabrax_maculatus_GLEAN_10005953,Lateolabrax_maculatus_GLEAN_10003893,Lateolabrax_maculatus_GLEAN_10016876,Lateolabrax_maculatus_GLEAN_10016318,Lateolabrax_maculatus_GLEAN_1…
GO:0000902	cell morphogenesis	BP	7.31881e-11	1.2175e-08	62	1000	382	13395	Over	4	Lateolabrax_maculatus_GLEAN_10009155,Lateolabrax_maculatus_GLEAN_10012392,Lateolabrax_maculatus_GLEAN_10015306,Lateolabrax_maculatus_GLEAN_10011121,Lateolabrax_maculatus_GLEAN_10012914,Lateolabrax_maculatus_GLEAN_10001506,Lateolabrax_maculatus_GLEAN_10011202,Lateolabrax_maculatus_GLEAN_10011759,Lateolabrax_maculatus_GLEAN_10005953,Lateolabrax_maculatus_GLEAN_10003893,Lateolabrax_maculatus_GLEAN_1…
GO:0009888	tissue development	BP	1.44587e-10	2.01468e-08	85	1570	382	13395	Over	4	Lateolabrax_maculatus_GLEAN_10018895,Lateolabrax_maculatus_GLEAN_10016474,Lateolabrax_maculatus_GLEAN_10015306,Lateolabrax_maculatus_GLEAN_10011121,Lateolabrax_maculatus_GLEAN_10013871,Lateolabrax_maculatus_GLEAN_10007383,Lateolabrax_maculatus_GLEAN_10005386,Lateolabrax_maculatus_GLEAN_10019870,Lateolabrax_maculatus_GLEAN_10011759,Lateolabrax_maculatus_GLEAN_10010618,Lateolabrax_maculatus_GLEAN_1…
GO:0030154	cell differentiation	BP	1.68927e-10	2.17148e-08	136	2961	382	13395	Over	4	Lateolabrax_maculatus_GLEAN_10009155,Lateolabrax_maculatus_GLEAN_10016971,Lateolabrax_maculatus_GLEAN_10018895,Lateolabrax_maculatus_GLEAN_10012392,Lateolabrax_maculatus_GLEAN_10015306,Lateolabrax_maculatus_GLEAN_10007977,Lateolabrax_maculatus_GLEAN_10011121,Lateolabrax_maculatus_GLEAN_10013871,Lateolabrax_maculatus_GLEAN_10004484,Lateolabrax_maculatus_GLEAN_10012914,Lateolabrax_maculatus_GLEAN_1…
GO:0048468	cell development	BP	3.46026e-10	4.23133e-08	92	1772	382	13395	Over	4	Lateolabrax_maculatus_GLEAN_10009155,Lateolabrax_maculatus_GLEAN_10018895,Lateolabrax_maculatus_GLEAN_10012392,Lateolabrax_maculatus_GLEAN_10015306,Lateolabrax_maculatus_GLEAN_10011121,Lateolabrax_maculatus_GLEAN_10013871,Lateolabrax_maculatus_GLEAN_10012914,Lateolabrax_maculatus_GLEAN_10005386,Lateolabrax_maculatus_GLEAN_10007135,Lateolabrax_maculatus_GLEAN_10001506,Lateolabrax_maculatus_GLEAN_1…
GO:0006935	chemotaxis	BP	5.0336e-09	4.2085e-07	41	602	382	13395	Over	4	Lateolabrax_maculatus_GLEAN_10009155,Lateolabrax_maculatus_GLEAN_10015306,Lateolabrax_maculatus_GLEAN_10011121,Lateolabrax_maculatus_GLEAN_10011202,Lateolabrax_maculatus_GLEAN_10011759,Lateolabrax_maculatus_GLEAN_10003893,Lateolabrax_maculatus_GLEAN_10016876,Lateolabrax_maculatus_GLEAN_10016318,Lateolabrax_maculatus_GLEAN_10011596,Lateolabrax_maculatus_GLEAN_10018218,Lateolabrax_maculatus_GLEAN_1…
GO:0035295	tube development	BP	1.32228e-08	9.34854e-07	50	817	382	13395	Over	4	Lateolabrax_maculatus_GLEAN_10009155,Lateolabrax_maculatus_GLEAN_10015306,Lateolabrax_maculatus_GLEAN_10006571,Lateolabrax_maculatus_GLEAN_10011121,Lateolabrax_maculatus_GLEAN_10013871,Lateolabrax_maculatus_GLEAN_10004484,Lateolabrax_maculatus_GLEAN_10001506,Lateolabrax_maculatus_GLEAN_10011759,Lateolabrax_maculatus_GLEAN_10004039,Lateolabrax_maculatus_GLEAN_10000899,Lateolabrax_maculatus_GLEAN_1…
GO:2000026	regulation of multicellular organismal development	BP	6.9745e-08	4.4827e-06	55	968	382	13395	Over	4	Lateolabrax_maculatus_GLEAN_10009155,Lateolabrax_maculatus_GLEAN_10016474,Lateolabrax_maculatus_GLEAN_10015306,Lateolabrax_maculatus_GLEAN_10011121,Lateolabrax_maculatus_GLEAN_10013871,Lateolabrax_maculatus_GLEAN_10005386,Lateolabrax_maculatus_GLEAN_10011202,Lateolabrax_maculatus_GLEAN_10011759,Lateolabrax_maculatus_GLEAN_10005953,Lateolabrax_maculatus_GLEAN_10008462,Lateolabrax_maculatus_GLEAN_1…
GO:0016477	cell migration	BP	1.05493e-07	6.4855e-06	57	1026	382	13395	Over	4	Lateolabrax_maculatus_GLEAN_10009155,Lateolabrax_maculatus_GLEAN_10018895,Lateolabrax_maculatus_GLEAN_10015306,Lateolabrax_maculatus_GLEAN_10019870,Lateolabrax_maculatus_GLEAN_10011759,Lateolabrax_maculatus_GLEAN_10014593,Lateolabrax_maculatus_GLEAN_10005953,Lateolabrax_maculatus_GLEAN_10007879,Lateolabrax_maculatus_GLEAN_10003893,Lateolabrax_maculatus_GLEAN_10000963,Lateolabrax_maculatus_GLEAN_1…
GO:0097485	neuron projection guidance	BP	1.58513e-07	9.14849e-06	31	439	382	13395	Over	4	Lateolabrax_maculatus_GLEAN_10015306,Lateolabrax_maculatus_GLEAN_10011121,Lateolabrax_maculatus_GLEAN_10011202,Lateolabrax_maculatus_GLEAN_10011759,Lateolabrax_maculatus_GLEAN_10003893,Lateolabrax_maculatus_GLEAN_10016876,Lateolabrax_maculatus_GLEAN_10016318,Lateolabrax_maculatus_GLEAN_10018218,Lateolabrax_maculatus_GLEAN_10004926,Lateolabrax_maculatus_GLEAN_10002532,Lateolabrax_maculatus_GLEAN_1…
GO:0048729	tissue morphogenesis	BP	2.79678e-07	1.46468e-05	37	576	382	13395	Over	4	Lateolabrax_maculatus_GLEAN_10015306,Lateolabrax_maculatus_GLEAN_10011121,Lateolabrax_maculatus_GLEAN_10000963,Lateolabrax_maculatus_GLEAN_10005217,Lateolabrax_maculatus_GLEAN_10017044,Lateolabrax_maculatus_GLEAN_10018218,Lateolabrax_maculatus_GLEAN_10002532,Lateolabrax_maculatus_GLEAN_10016053,Lateolabrax_maculatus_GLEAN_10014045,Lateolabrax_maculatus_GLEAN_10013833,Lateolabrax_maculatus_GLEAN_1…
GO:0048640	negative regulation of developmental growth	BP	5.44208e-07	2.79822e-05	7	19	382	13395	Over	4	Lateolabrax_maculatus_GLEAN_10002532,Lateolabrax_maculatus_GLEAN_10004409,Lateolabrax_maculatus_GLEAN_10003916,Lateolabrax_maculatus_GLEAN_10002012,Lateolabrax_maculatus_GLEAN_10018833,Lateolabrax_maculatus_GLEAN_10008305,Lateolabrax_maculatus_GLEAN_10010893
GO:0005539	glycosaminoglycan binding	MF	1.43466e-06	6.99519e-05	14	104	382	13395	Over	4	Lateolabrax_maculatus_GLEAN_10011673,Lateolabrax_maculatus_GLEAN_10001930,Lateolabrax_maculatus_GLEAN_10011596,Lateolabrax_maculatus_GLEAN_10018218,Lateolabrax_maculatus_GLEAN_10005954,Lateolabrax_maculatus_GLEAN_10017576,Lateolabrax_maculatus_GLEAN_10018513,Lateolabrax_maculatus_GLEAN_10005643,Lateolabrax_maculatus_GLEAN_10015423,Lateolabrax_maculatus_GLEAN_10000500,Lateolabrax_maculatus_GLEAN_1…
GO:0043062	extracellular structure organization	BP	6.1365e-26	1.7354e-22	39	299	382	13395	Over	5	Lateolabrax_maculatus_GLEAN_10016474,Lateolabrax_maculatus_GLEAN_10007977,Lateolabrax_maculatus_GLEAN_10013871,Lateolabrax_maculatus_GLEAN_10011673,Lateolabrax_maculatus_GLEAN_10004383,Lateolabrax_maculatus_GLEAN_10004273,Lateolabrax_maculatus_GLEAN_10011759,Lateolabrax_maculatus_GLEAN_10014593,Lateolabrax_maculatus_GLEAN_10007063,Lateolabrax_maculatus_GLEAN_10005217,Lateolabrax_maculatus_GLEAN_1…
GO:0000904	cell morphogenesis involved in differentiation	BP	2.15382e-11	4.64809e-09	39	496	382	13395	Over	5	Lateolabrax_maculatus_GLEAN_10012392,Lateolabrax_maculatus_GLEAN_10015306,Lateolabrax_maculatus_GLEAN_10011121,Lateolabrax_maculatus_GLEAN_10012914,Lateolabrax_maculatus_GLEAN_10001506,Lateolabrax_maculatus_GLEAN_10011202,Lateolabrax_maculatus_GLEAN_10011759,Lateolabrax_maculatus_GLEAN_10007063,Lateolabrax_maculatus_GLEAN_10016318,Lateolabrax_maculatus_GLEAN_10017044,Lateolabrax_maculatus_GLEAN_1…
GO:0030030	cell projection organization	BP	4.90732e-10	5.55116e-08	67	1153	382	13395	Over	5	Lateolabrax_maculatus_GLEAN_10009155,Lateolabrax_maculatus_GLEAN_10016971,Lateolabrax_maculatus_GLEAN_10015306,Lateolabrax_maculatus_GLEAN_10011121,Lateolabrax_maculatus_GLEAN_10012914,Lateolabrax_maculatus_GLEAN_10011202,Lateolabrax_maculatus_GLEAN_10019870,Lateolabrax_maculatus_GLEAN_10011759,Lateolabrax_maculatus_GLEAN_10005953,Lateolabrax_maculatus_GLEAN_10003893,Lateolabrax_maculatus_GLEAN_1…
GO:0048858	cell projection morphogenesis	BP	7.54954e-10	7.90744e-08	48	725	382	13395	Over	5	Lateolabrax_maculatus_GLEAN_10015306,Lateolabrax_maculatus_GLEAN_10011121,Lateolabrax_maculatus_GLEAN_10012914,Lateolabrax_maculatus_GLEAN_10011202,Lateolabrax_maculatus_GLEAN_10011759,Lateolabrax_maculatus_GLEAN_10005953,Lateolabrax_maculatus_GLEAN_10003893,Lateolabrax_maculatus_GLEAN_10016876,Lateolabrax_maculatus_GLEAN_10016318,Lateolabrax_maculatus_GLEAN_10016265,Lateolabrax_maculatus_GLEAN_1…
GO:0032990	cell part morphogenesis	BP	7.54954e-10	7.90744e-08	48	725	382	13395	Over	5	Lateolabrax_maculatus_GLEAN_10015306,Lateolabrax_maculatus_GLEAN_10011121,Lateolabrax_maculatus_GLEAN_10012914,Lateolabrax_maculatus_GLEAN_10011202,Lateolabrax_maculatus_GLEAN_10011759,Lateolabrax_maculatus_GLEAN_10005953,Lateolabrax_maculatus_GLEAN_10003893,Lateolabrax_maculatus_GLEAN_10016876,Lateolabrax_maculatus_GLEAN_10016318,Lateolabrax_maculatus_GLEAN_10016265,Lateolabrax_maculatus_GLEAN_1…
GO:0022008	neurogenesis	BP	1.2196e-09	1.23179e-07	70	1245	382	13395	Over	5	Lateolabrax_maculatus_GLEAN_10009155,Lateolabrax_maculatus_GLEAN_10016971,Lateolabrax_maculatus_GLEAN_10015306,Lateolabrax_maculatus_GLEAN_10011121,Lateolabrax_maculatus_GLEAN_10012914,Lateolabrax_maculatus_GLEAN_10005386,Lateolabrax_maculatus_GLEAN_10011202,Lateolabrax_maculatus_GLEAN_10019870,Lateolabrax_maculatus_GLEAN_10011759,Lateolabrax_maculatus_GLEAN_10005953,Lateolabrax_maculatus_GLEAN_1…
GO:0030182	neuron differentiation	BP	3.27303e-09	2.98585e-07	63	1096	382	13395	Over	5	Lateolabrax_maculatus_GLEAN_10009155,Lateolabrax_maculatus_GLEAN_10015306,Lateolabrax_maculatus_GLEAN_10011121,Lateolabrax_maculatus_GLEAN_10012914,Lateolabrax_maculatus_GLEAN_10005386,Lateolabrax_maculatus_GLEAN_10011202,Lateolabrax_maculatus_GLEAN_10019870,Lateolabrax_maculatus_GLEAN_10011759,Lateolabrax_maculatus_GLEAN_10005953,Lateolabrax_maculatus_GLEAN_10003893,Lateolabrax_maculatus_GLEAN_1…
GO:0048666	neuron development	BP	4.15127e-09	3.66869e-07	57	958	382	13395	Over	5	Lateolabrax_maculatus_GLEAN_10009155,Lateolabrax_maculatus_GLEAN_10015306,Lateolabrax_maculatus_GLEAN_10011121,Lateolabrax_maculatus_GLEAN_10012914,Lateolabrax_maculatus_GLEAN_10011202,Lateolabrax_maculatus_GLEAN_10019870,Lateolabrax_maculatus_GLEAN_10011759,Lateolabrax_maculatus_GLEAN_10005953,Lateolabrax_maculatus_GLEAN_10003893,Lateolabrax_maculatus_GLEAN_10016876,Lateolabrax_maculatus_GLEAN_1…
GO:0072359	circulatory system development	BP	5.05972e-09	4.2085e-07	48	755	382	13395	Over	5	Lateolabrax_maculatus_GLEAN_10009155,Lateolabrax_maculatus_GLEAN_10015306,Lateolabrax_maculatus_GLEAN_10011759,Lateolabrax_maculatus_GLEAN_10016532,Lateolabrax_maculatus_GLEAN_10005953,Lateolabrax_maculatus_GLEAN_10007879,Lateolabrax_maculatus_GLEAN_10003893,Lateolabrax_maculatus_GLEAN_10005217,Lateolabrax_maculatus_GLEAN_10013999,Lateolabrax_maculatus_GLEAN_10000899,Lateolabrax_maculatus_GLEAN_1…
GO:0007399	nervous system development	BP	1.26468e-08	9.17058e-07	84	1661	382	13395	Over	5	Lateolabrax_maculatus_GLEAN_10009155,Lateolabrax_maculatus_GLEAN_10016971,Lateolabrax_maculatus_GLEAN_10015306,Lateolabrax_maculatus_GLEAN_10011121,Lateolabrax_maculatus_GLEAN_10012914,Lateolabrax_maculatus_GLEAN_10005386,Lateolabrax_maculatus_GLEAN_10011202,Lateolabrax_maculatus_GLEAN_10019870,Lateolabrax_maculatus_GLEAN_10011759,Lateolabrax_maculatus_GLEAN_10005953,Lateolabrax_maculatus_GLEAN_1…
GO:0002009	morphogenesis of an epithelium	BP	8.79823e-08	5.5292e-06	32	452	382	13395	Over	5	Lateolabrax_maculatus_GLEAN_10015306,Lateolabrax_maculatus_GLEAN_10011121,Lateolabrax_maculatus_GLEAN_10000963,Lateolabrax_maculatus_GLEAN_10018218,Lateolabrax_maculatus_GLEAN_10002532,Lateolabrax_maculatus_GLEAN_10016053,Lateolabrax_maculatus_GLEAN_10013833,Lateolabrax_maculatus_GLEAN_10005954,Lateolabrax_maculatus_GLEAN_10018513,Lateolabrax_maculatus_GLEAN_10015915,Lateolabrax_maculatus_GLEAN_1…
GO:0010810	regulation of cell-substrate adhesion	BP	2.03698e-07	1.1078e-05	16	117	382	13395	Over	5	Lateolabrax_maculatus_GLEAN_10011673,Lateolabrax_maculatus_GLEAN_10019870,Lateolabrax_maculatus_GLEAN_10013999,Lateolabrax_maculatus_GLEAN_10010117,Lateolabrax_maculatus_GLEAN_10017576,Lateolabrax_maculatus_GLEAN_10013650,Lateolabrax_maculatus_GLEAN_10015915,Lateolabrax_maculatus_GLEAN_10002177,Lateolabrax_maculatus_GLEAN_10011927,Lateolabrax_maculatus_GLEAN_10007625,Lateolabrax_maculatus_GLEAN_1…
GO:0001944	vasculature development	BP	1.68203e-06	8.06234e-05	30	451	382	13395	Over	5	Lateolabrax_maculatus_GLEAN_10009155,Lateolabrax_maculatus_GLEAN_10011759,Lateolabrax_maculatus_GLEAN_10016532,Lateolabrax_maculatus_GLEAN_10000899,Lateolabrax_maculatus_GLEAN_10011596,Lateolabrax_maculatus_GLEAN_10002532,Lateolabrax_maculatus_GLEAN_10016053,Lateolabrax_maculatus_GLEAN_10004088,Lateolabrax_maculatus_GLEAN_10009117,Lateolabrax_maculatus_GLEAN_10017576,Lateolabrax_maculatus_GLEAN_1…
GO:0070848	response to growth factor	BP	2.03901e-06	9.30052e-05	28	411	382	13395	Over	5	Lateolabrax_maculatus_GLEAN_10009155,Lateolabrax_maculatus_GLEAN_10016474,Lateolabrax_maculatus_GLEAN_10004484,Lateolabrax_maculatus_GLEAN_10005386,Lateolabrax_maculatus_GLEAN_10007879,Lateolabrax_maculatus_GLEAN_10007063,Lateolabrax_maculatus_GLEAN_10004039,Lateolabrax_maculatus_GLEAN_10005465,Lateolabrax_maculatus_GLEAN_10002532,Lateolabrax_maculatus_GLEAN_10017576,Lateolabrax_maculatus_GLEAN_1…
GO:0072358	cardiovascular system development	BP	2.18785e-06	9.66756e-05	30	455	382	13395	Over	5	Lateolabrax_maculatus_GLEAN_10009155,Lateolabrax_maculatus_GLEAN_10011759,Lateolabrax_maculatus_GLEAN_10016532,Lateolabrax_maculatus_GLEAN_10000899,Lateolabrax_maculatus_GLEAN_10011596,Lateolabrax_maculatus_GLEAN_10002532,Lateolabrax_maculatus_GLEAN_10016053,Lateolabrax_maculatus_GLEAN_10004088,Lateolabrax_maculatus_GLEAN_10009117,Lateolabrax_maculatus_GLEAN_10017576,Lateolabrax_maculatus_GLEAN_1…

## Sheet: alk-down-only
GO_ID	GO_Term	GO_Class	Pvalue	AdjustedPv	x1	x2	n	N	EnrichDirect	GOlevl	GeneID
GO:0009607	response to biotic stimulus	BP	7.56767e-11	2.28544e-08	21	547	136	13395	Over	3	Lateolabrax_maculatus_GLEAN_10008031,Lateolabrax_maculatus_GLEAN_10011823,Lateolabrax_maculatus_GLEAN_10017588,Lateolabrax_maculatus_GLEAN_10004167,Lateolabrax_maculatus_GLEAN_10020004,Lateolabrax_maculatus_GLEAN_10007551,Lateolabrax_maculatus_GLEAN_10011357,Lateolabrax_maculatus_GLEAN_10022636,Lateolabrax_maculatus_GLEAN_10010144,Lateolabrax_maculatus_GLEAN_10002895,Lateolabrax_maculatus_GLEAN_1…
GO:0099080	supramolecular complex	CC	5.52901e-10	1.00186e-07	22	440	136	13395	Over	3	Lateolabrax_maculatus_GLEAN_10001157,Lateolabrax_maculatus_GLEAN_10011823,Lateolabrax_maculatus_GLEAN_10014793,Lateolabrax_maculatus_GLEAN_10017588,Lateolabrax_maculatus_GLEAN_10004167,Lateolabrax_maculatus_GLEAN_10023318,Lateolabrax_maculatus_GLEAN_10007551,Lateolabrax_maculatus_GLEAN_10004166,Lateolabrax_maculatus_GLEAN_10005469,Lateolabrax_maculatus_GLEAN_10011357,Lateolabrax_maculatus_GLEAN_1…
GO:0051707	response to other organism	BP	6.24904e-09	8.28848e-07	19	529	136	13395	Over	3	Lateolabrax_maculatus_GLEAN_10008031,Lateolabrax_maculatus_GLEAN_10011823,Lateolabrax_maculatus_GLEAN_10017588,Lateolabrax_maculatus_GLEAN_10020004,Lateolabrax_maculatus_GLEAN_10007551,Lateolabrax_maculatus_GLEAN_10011357,Lateolabrax_maculatus_GLEAN_10022636,Lateolabrax_maculatus_GLEAN_10010144,Lateolabrax_maculatus_GLEAN_10002895,Lateolabrax_maculatus_GLEAN_10018186,Lateolabrax_maculatus_GLEAN_1…
GO:0030029	actin filament-based process	BP	4.42572e-08	4.7173e-06	19	565	136	13395	Over	3	Lateolabrax_maculatus_GLEAN_10001157,Lateolabrax_maculatus_GLEAN_10014793,Lateolabrax_maculatus_GLEAN_10017588,Lateolabrax_maculatus_GLEAN_10004167,Lateolabrax_maculatus_GLEAN_10007551,Lateolabrax_maculatus_GLEAN_10011357,Lateolabrax_maculatus_GLEAN_10016321,Lateolabrax_maculatus_GLEAN_10007018,Lateolabrax_maculatus_GLEAN_10011618,Lateolabrax_maculatus_GLEAN_10001741,Lateolabrax_maculatus_GLEAN_1…
GO:0098687	chromosomal region	CC	5.57124e-05	0.00186946	8	131	136	13395	Over	3	Lateolabrax_maculatus_GLEAN_10023318,Lateolabrax_maculatus_GLEAN_10014232,Lateolabrax_maculatus_GLEAN_10011349,Lateolabrax_maculatus_GLEAN_10002934,Lateolabrax_maculatus_GLEAN_10006361,Lateolabrax_maculatus_GLEAN_10016405,Lateolabrax_maculatus_GLEAN_10015881,Lateolabrax_maculatus_GLEAN_10017931
GO:0030017	sarcomere	CC	6.89571e-05	0.00227182	8	135	136	13395	Over	3	Lateolabrax_maculatus_GLEAN_10014793,Lateolabrax_maculatus_GLEAN_10004167,Lateolabrax_maculatus_GLEAN_10007551,Lateolabrax_maculatus_GLEAN_10011618,Lateolabrax_maculatus_GLEAN_10011614,Lateolabrax_maculatus_GLEAN_10013683,Lateolabrax_maculatus_GLEAN_10000935,Lateolabrax_maculatus_GLEAN_10002007
GO:0003008	system process	BP	7.39367e-05	0.00239238	30	1484	136	13395	Over	3	Lateolabrax_maculatus_GLEAN_10001157,Lateolabrax_maculatus_GLEAN_10014793,Lateolabrax_maculatus_GLEAN_10017588,Lateolabrax_maculatus_GLEAN_10020004,Lateolabrax_maculatus_GLEAN_10008167,Lateolabrax_maculatus_GLEAN_10007551,Lateolabrax_maculatus_GLEAN_10011357,Lateolabrax_maculatus_GLEAN_10001551,Lateolabrax_maculatus_GLEAN_10009075,Lateolabrax_maculatus_GLEAN_10016321,Lateolabrax_maculatus_GLEAN_1…
GO:0016459	myosin complex	CC	0.000147142	0.00430035	5	50	136	13395	Over	3	Lateolabrax_maculatus_GLEAN_10001157,Lateolabrax_maculatus_GLEAN_10007018,Lateolabrax_maculatus_GLEAN_10011618,Lateolabrax_maculatus_GLEAN_10011614,Lateolabrax_maculatus_GLEAN_10014804
GO:0007049	cell cycle	BP	0.000165195	0.00475133	24	1122	136	13395	Over	3	Lateolabrax_maculatus_GLEAN_10017588,Lateolabrax_maculatus_GLEAN_10023318,Lateolabrax_maculatus_GLEAN_10013279,Lateolabrax_maculatus_GLEAN_10011357,Lateolabrax_maculatus_GLEAN_10017620,Lateolabrax_maculatus_GLEAN_10014232,Lateolabrax_maculatus_GLEAN_10015646,Lateolabrax_maculatus_GLEAN_10011349,Lateolabrax_maculatus_GLEAN_10013973,Lateolabrax_maculatus_GLEAN_10000707,Lateolabrax_maculatus_GLEAN_1…
GO:0031674	I band	CC	0.000294891	0.00763347	7	126	136	13395	Over	3	Lateolabrax_maculatus_GLEAN_10014793,Lateolabrax_maculatus_GLEAN_10004167,Lateolabrax_maculatus_GLEAN_10007551,Lateolabrax_maculatus_GLEAN_10011618,Lateolabrax_maculatus_GLEAN_10011614,Lateolabrax_maculatus_GLEAN_10013683,Lateolabrax_maculatus_GLEAN_10000935
GO:0022403	cell cycle phase	BP	0.000434912	0.00997544	9	222	136	13395	Over	3	Lateolabrax_maculatus_GLEAN_10023318,Lateolabrax_maculatus_GLEAN_10014232,Lateolabrax_maculatus_GLEAN_10011349,Lateolabrax_maculatus_GLEAN_10000707,Lateolabrax_maculatus_GLEAN_10018323,Lateolabrax_maculatus_GLEAN_10003941,Lateolabrax_maculatus_GLEAN_10006361,Lateolabrax_maculatus_GLEAN_10007233,Lateolabrax_maculatus_GLEAN_10017931
GO:0009605	response to external stimulus	BP	0.000457655	0.0102379	30	1605	136	13395	Over	3	Lateolabrax_maculatus_GLEAN_10008031,Lateolabrax_maculatus_GLEAN_10011823,Lateolabrax_maculatus_GLEAN_10017588,Lateolabrax_maculatus_GLEAN_10008032,Lateolabrax_maculatus_GLEAN_10004167,Lateolabrax_maculatus_GLEAN_10020004,Lateolabrax_maculatus_GLEAN_10002117,Lateolabrax_maculatus_GLEAN_10007551,Lateolabrax_maculatus_GLEAN_10011357,Lateolabrax_maculatus_GLEAN_10022636,Lateolabrax_maculatus_GLEAN_1…
GO:0043229	intracellular organelle	CC	0.000524779	0.011187	94	7234	136	13395	Over	3	Lateolabrax_maculatus_GLEAN_10004923,Lateolabrax_maculatus_GLEAN_10010944,Lateolabrax_maculatus_GLEAN_10022620,Lateolabrax_maculatus_GLEAN_10001157,Lateolabrax_maculatus_GLEAN_10011823,Lateolabrax_maculatus_GLEAN_10014793,Lateolabrax_maculatus_GLEAN_10017588,Lateolabrax_maculatus_GLEAN_10004167,Lateolabrax_maculatus_GLEAN_10017657,Lateolabrax_maculatus_GLEAN_10008167,Lateolabrax_maculatus_GLEAN_1…
GO:0050879	multicellular organismal movement	BP	0.000634773	0.0121075	4	39	136	13395	Over	3	Lateolabrax_maculatus_GLEAN_10001842,Lateolabrax_maculatus_GLEAN_10011618,Lateolabrax_maculatus_GLEAN_10011614,Lateolabrax_maculatus_GLEAN_10002007
GO:0036379	myofilament	CC	0.000747111	0.0135376	3	18	136	13395	Over	3	Lateolabrax_maculatus_GLEAN_10017588,Lateolabrax_maculatus_GLEAN_10011357,Lateolabrax_maculatus_GLEAN_10017047
GO:0030048	actin filament-based movement	BP	5.71126e-12	2.5872e-09	14	111	136	13395	Over	4	Lateolabrax_maculatus_GLEAN_10014793,Lateolabrax_maculatus_GLEAN_10017588,Lateolabrax_maculatus_GLEAN_10011357,Lateolabrax_maculatus_GLEAN_10016321,Lateolabrax_maculatus_GLEAN_10011618,Lateolabrax_maculatus_GLEAN_10001741,Lateolabrax_maculatus_GLEAN_10011614,Lateolabrax_maculatus_GLEAN_10014804,Lateolabrax_maculatus_GLEAN_10013776,Lateolabrax_maculatus_GLEAN_10017047,Lateolabrax_maculatus_GLEAN_1…
GO:0061061	muscle structure development	BP	3.80881e-11	1.38031e-08	21	537	136	13395	Over	4	Lateolabrax_maculatus_GLEAN_10001157,Lateolabrax_maculatus_GLEAN_10014793,Lateolabrax_maculatus_GLEAN_10017588,Lateolabrax_maculatus_GLEAN_10020004,Lateolabrax_maculatus_GLEAN_10011357,Lateolabrax_maculatus_GLEAN_10014232,Lateolabrax_maculatus_GLEAN_10010144,Lateolabrax_maculatus_GLEAN_10016321,Lateolabrax_maculatus_GLEAN_10007018,Lateolabrax_maculatus_GLEAN_10011618,Lateolabrax_maculatus_GLEAN_1…
GO:0003012	muscle system process	BP	1.58542e-10	4.10396e-08	22	412	136	13395	Over	4	Lateolabrax_maculatus_GLEAN_10001157,Lateolabrax_maculatus_GLEAN_10014793,Lateolabrax_maculatus_GLEAN_10017588,Lateolabrax_maculatus_GLEAN_10007551,Lateolabrax_maculatus_GLEAN_10011357,Lateolabrax_maculatus_GLEAN_10001551,Lateolabrax_maculatus_GLEAN_10016321,Lateolabrax_maculatus_GLEAN_10023060,Lateolabrax_maculatus_GLEAN_10007018,Lateolabrax_maculatus_GLEAN_10001842,Lateolabrax_maculatus_GLEAN_1…
GO:0043207	response to external biotic stimulus	BP	7.64696e-10	1.25966e-07	20	539	136	13395	Over	4	Lateolabrax_maculatus_GLEAN_10008031,Lateolabrax_maculatus_GLEAN_10011823,Lateolabrax_maculatus_GLEAN_10017588,Lateolabrax_maculatus_GLEAN_10004167,Lateolabrax_maculatus_GLEAN_10020004,Lateolabrax_maculatus_GLEAN_10007551,Lateolabrax_maculatus_GLEAN_10011357,Lateolabrax_maculatus_GLEAN_10022636,Lateolabrax_maculatus_GLEAN_10010144,Lateolabrax_maculatus_GLEAN_10002895,Lateolabrax_maculatus_GLEAN_1…
GO:0099081	supramolecular polymer	CC	3.07556e-07	2.53314e-05	15	295	136	13395	Over	4	Lateolabrax_maculatus_GLEAN_10001157,Lateolabrax_maculatus_GLEAN_10014793,Lateolabrax_maculatus_GLEAN_10017588,Lateolabrax_maculatus_GLEAN_10004167,Lateolabrax_maculatus_GLEAN_10007551,Lateolabrax_maculatus_GLEAN_10004166,Lateolabrax_maculatus_GLEAN_10011357,Lateolabrax_maculatus_GLEAN_10011618,Lateolabrax_maculatus_GLEAN_10011614,Lateolabrax_maculatus_GLEAN_10013683,Lateolabrax_maculatus_GLEAN_1…
GO:0043292	contractile fiber	CC	4.32468e-07	3.4071e-05	12	187	136	13395	Over	4	Lateolabrax_maculatus_GLEAN_10001157,Lateolabrax_maculatus_GLEAN_10014793,Lateolabrax_maculatus_GLEAN_10017588,Lateolabrax_maculatus_GLEAN_10004167,Lateolabrax_maculatus_GLEAN_10007551,Lateolabrax_maculatus_GLEAN_10011357,Lateolabrax_maculatus_GLEAN_10011618,Lateolabrax_maculatus_GLEAN_10011614,Lateolabrax_maculatus_GLEAN_10013683,Lateolabrax_maculatus_GLEAN_10000935,Lateolabrax_maculatus_GLEAN_1…
GO:0048729	tissue morphogenesis	BP	7.40376e-07	4.96874e-05	18	576	136	13395	Over	4	Lateolabrax_maculatus_GLEAN_10001157,Lateolabrax_maculatus_GLEAN_10017588,Lateolabrax_maculatus_GLEAN_10011357,Lateolabrax_maculatus_GLEAN_10022636,Lateolabrax_maculatus_GLEAN_10016321,Lateolabrax_maculatus_GLEAN_10007018,Lateolabrax_maculatus_GLEAN_10015646,Lateolabrax_maculatus_GLEAN_10011618,Lateolabrax_maculatus_GLEAN_10001741,Lateolabrax_maculatus_GLEAN_10011614,Lateolabrax_maculatus_GLEAN_1…
GO:0009888	tissue development	BP	2.53908e-06	0.000143775	34	1570	136	13395	Over	4	Lateolabrax_maculatus_GLEAN_10001157,Lateolabrax_maculatus_GLEAN_10017588,Lateolabrax_maculatus_GLEAN_10004167,Lateolabrax_maculatus_GLEAN_10020004,Lateolabrax_maculatus_GLEAN_10008167,Lateolabrax_maculatus_GLEAN_10009294,Lateolabrax_maculatus_GLEAN_10011357,Lateolabrax_maculatus_GLEAN_10022636,Lateolabrax_maculatus_GLEAN_10017620,Lateolabrax_maculatus_GLEAN_10014232,Lateolabrax_maculatus_GLEAN_1…
GO:0010927	cellular component assembly involved in morphogenesis	BP	4.03974e-06	0.000202367	11	192	136	13395	Over	4	Lateolabrax_maculatus_GLEAN_10001157,Lateolabrax_maculatus_GLEAN_10017588,Lateolabrax_maculatus_GLEAN_10011357,Lateolabrax_maculatus_GLEAN_10007018,Lateolabrax_maculatus_GLEAN_10011618,Lateolabrax_maculatus_GLEAN_10011614,Lateolabrax_maculatus_GLEAN_10013776,Lateolabrax_maculatus_GLEAN_10017047,Lateolabrax_maculatus_GLEAN_10014297,Lateolabrax_maculatus_GLEAN_10019047,Lateolabrax_maculatus_GLEAN_1…
GO:0043232	intracellular non-membrane-bounded organelle	CC	4.13222e-06	0.000202367	44	2300	136	13395	Over	4	Lateolabrax_maculatus_GLEAN_10001157,Lateolabrax_maculatus_GLEAN_10011823,Lateolabrax_maculatus_GLEAN_10014793,Lateolabrax_maculatus_GLEAN_10017588,Lateolabrax_maculatus_GLEAN_10004167,Lateolabrax_maculatus_GLEAN_10023318,Lateolabrax_maculatus_GLEAN_10007551,Lateolabrax_maculatus_GLEAN_10004166,Lateolabrax_maculatus_GLEAN_10017138,Lateolabrax_maculatus_GLEAN_10005469,Lateolabrax_maculatus_GLEAN_1…
GO:0043228	non-membrane-bounded organelle	CC	4.13222e-06	0.000202367	44	2300	136	13395	Over	4	Lateolabrax_maculatus_GLEAN_10001157,Lateolabrax_maculatus_GLEAN_10011823,Lateolabrax_maculatus_GLEAN_10014793,Lateolabrax_maculatus_GLEAN_10017588,Lateolabrax_maculatus_GLEAN_10004167,Lateolabrax_maculatus_GLEAN_10023318,Lateolabrax_maculatus_GLEAN_10007551,Lateolabrax_maculatus_GLEAN_10004166,Lateolabrax_maculatus_GLEAN_10017138,Lateolabrax_maculatus_GLEAN_10005469,Lateolabrax_maculatus_GLEAN_1…
GO:0000775	chromosome, centromeric region	CC	4.50437e-06	0.000213297	7	66	136	13395	Over	4	Lateolabrax_maculatus_GLEAN_10023318,Lateolabrax_maculatus_GLEAN_10014232,Lateolabrax_maculatus_GLEAN_10011349,Lateolabrax_maculatus_GLEAN_10002934,Lateolabrax_maculatus_GLEAN_10006361,Lateolabrax_maculatus_GLEAN_10015881,Lateolabrax_maculatus_GLEAN_10017931
GO:0016460	myosin II complex	CC	9.78389e-06	0.000412288	5	29	136	13395	Over	4	Lateolabrax_maculatus_GLEAN_10001157,Lateolabrax_maculatus_GLEAN_10007018,Lateolabrax_maculatus_GLEAN_10011618,Lateolabrax_maculatus_GLEAN_10011614,Lateolabrax_maculatus_GLEAN_10014804
GO:0010033	response to organic substance	BP	1.93762e-05	0.00073145	37	1894	136	13395	Over	4	Lateolabrax_maculatus_GLEAN_10008031,Lateolabrax_maculatus_GLEAN_10011823,Lateolabrax_maculatus_GLEAN_10017588,Lateolabrax_maculatus_GLEAN_10008032,Lateolabrax_maculatus_GLEAN_10004167,Lateolabrax_maculatus_GLEAN_10020004,Lateolabrax_maculatus_GLEAN_10002117,Lateolabrax_maculatus_GLEAN_10007551,Lateolabrax_maculatus_GLEAN_10005469,Lateolabrax_maculatus_GLEAN_10011357,Lateolabrax_maculatus_GLEAN_1…
GO:1901700	response to oxygen-containing compound	BP	0.000145861	0.00430035	19	796	136	13395	Over	4	Lateolabrax_maculatus_GLEAN_10017588,Lateolabrax_maculatus_GLEAN_10020004,Lateolabrax_maculatus_GLEAN_10002117,Lateolabrax_maculatus_GLEAN_10011357,Lateolabrax_maculatus_GLEAN_10014232,Lateolabrax_maculatus_GLEAN_10010144,Lateolabrax_maculatus_GLEAN_10014253,Lateolabrax_maculatus_GLEAN_10001842,Lateolabrax_maculatus_GLEAN_10016017,Lateolabrax_maculatus_GLEAN_10003784,Lateolabrax_maculatus_GLEAN_1…
GO:0070252	actin-mediated cell contraction	BP	1.51829e-12	1.37557e-09	14	101	136	13395	Over	5	Lateolabrax_maculatus_GLEAN_10014793,Lateolabrax_maculatus_GLEAN_10017588,Lateolabrax_maculatus_GLEAN_10011357,Lateolabrax_maculatus_GLEAN_10016321,Lateolabrax_maculatus_GLEAN_10011618,Lateolabrax_maculatus_GLEAN_10001741,Lateolabrax_maculatus_GLEAN_10011614,Lateolabrax_maculatus_GLEAN_10014804,Lateolabrax_maculatus_GLEAN_10013776,Lateolabrax_maculatus_GLEAN_10017047,Lateolabrax_maculatus_GLEAN_1…
GO:0006936	muscle contraction	BP	3.10373e-12	1.87465e-09	20	269	136	13395	Over	5	Lateolabrax_maculatus_GLEAN_10001157,Lateolabrax_maculatus_GLEAN_10017588,Lateolabrax_maculatus_GLEAN_10007551,Lateolabrax_maculatus_GLEAN_10011357,Lateolabrax_maculatus_GLEAN_10016321,Lateolabrax_maculatus_GLEAN_10023060,Lateolabrax_maculatus_GLEAN_10007018,Lateolabrax_maculatus_GLEAN_10001842,Lateolabrax_maculatus_GLEAN_10011618,Lateolabrax_maculatus_GLEAN_10001741,Lateolabrax_maculatus_GLEAN_1…
GO:0060415	muscle tissue morphogenesis	BP	2.63299e-10	5.96372e-08	13	121	136	13395	Over	5	Lateolabrax_maculatus_GLEAN_10001157,Lateolabrax_maculatus_GLEAN_10017588,Lateolabrax_maculatus_GLEAN_10011357,Lateolabrax_maculatus_GLEAN_10016321,Lateolabrax_maculatus_GLEAN_10007018,Lateolabrax_maculatus_GLEAN_10011618,Lateolabrax_maculatus_GLEAN_10001741,Lateolabrax_maculatus_GLEAN_10011614,Lateolabrax_maculatus_GLEAN_10013776,Lateolabrax_maculatus_GLEAN_10017047,Lateolabrax_maculatus_GLEAN_1…
GO:0048644	muscle organ morphogenesis	BP	4.84713e-10	9.7589e-08	13	127	136	13395	Over	5	Lateolabrax_maculatus_GLEAN_10001157,Lateolabrax_maculatus_GLEAN_10017588,Lateolabrax_maculatus_GLEAN_10011357,Lateolabrax_maculatus_GLEAN_10016321,Lateolabrax_maculatus_GLEAN_10007018,Lateolabrax_maculatus_GLEAN_10011618,Lateolabrax_maculatus_GLEAN_10001741,Lateolabrax_maculatus_GLEAN_10011614,Lateolabrax_maculatus_GLEAN_10013776,Lateolabrax_maculatus_GLEAN_10017047,Lateolabrax_maculatus_GLEAN_1…
GO:0007517	muscle organ development	BP	9.85297e-09	1.19024e-06	16	263	136	13395	Over	5	Lateolabrax_maculatus_GLEAN_10001157,Lateolabrax_maculatus_GLEAN_10014793,Lateolabrax_maculatus_GLEAN_10017588,Lateolabrax_maculatus_GLEAN_10011357,Lateolabrax_maculatus_GLEAN_10010144,Lateolabrax_maculatus_GLEAN_10016321,Lateolabrax_maculatus_GLEAN_10007018,Lateolabrax_maculatus_GLEAN_10011618,Lateolabrax_maculatus_GLEAN_10001741,Lateolabrax_maculatus_GLEAN_10011614,Lateolabrax_maculatus_GLEAN_1…
GO:0031032	actomyosin structure organization	BP	5.44964e-08	5.48597e-06	11	125	136	13395	Over	5	Lateolabrax_maculatus_GLEAN_10001157,Lateolabrax_maculatus_GLEAN_10017588,Lateolabrax_maculatus_GLEAN_10004167,Lateolabrax_maculatus_GLEAN_10011357,Lateolabrax_maculatus_GLEAN_10007018,Lateolabrax_maculatus_GLEAN_10011618,Lateolabrax_maculatus_GLEAN_10011614,Lateolabrax_maculatus_GLEAN_10013776,Lateolabrax_maculatus_GLEAN_10017047,Lateolabrax_maculatus_GLEAN_10019047,Lateolabrax_maculatus_GLEAN_1…
GO:1902652	secondary alcohol metabolic process	BP	7.60584e-08	6.89089e-06	7	37	136	13395	Over	5	Lateolabrax_maculatus_GLEAN_10004923,Lateolabrax_maculatus_GLEAN_10004070,Lateolabrax_maculatus_GLEAN_10017138,Lateolabrax_maculatus_GLEAN_10016502,Lateolabrax_maculatus_GLEAN_10018186,Lateolabrax_maculatus_GLEAN_10003044,Lateolabrax_maculatus_GLEAN_10000028
GO:0099512	supramolecular fiber	CC	3.07556e-07	2.53314e-05	15	295	136	13395	Over	5	Lateolabrax_maculatus_GLEAN_10001157,Lateolabrax_maculatus_GLEAN_10014793,Lateolabrax_maculatus_GLEAN_10017588,Lateolabrax_maculatus_GLEAN_10004167,Lateolabrax_maculatus_GLEAN_10007551,Lateolabrax_maculatus_GLEAN_10004166,Lateolabrax_maculatus_GLEAN_10011357,Lateolabrax_maculatus_GLEAN_10011618,Lateolabrax_maculatus_GLEAN_10011614,Lateolabrax_maculatus_GLEAN_10013683,Lateolabrax_maculatus_GLEAN_1…
GO:0030016	myofibril	CC	5.23519e-07	3.95257e-05	11	156	136	13395	Over	5	Lateolabrax_maculatus_GLEAN_10014793,Lateolabrax_maculatus_GLEAN_10017588,Lateolabrax_maculatus_GLEAN_10004167,Lateolabrax_maculatus_GLEAN_10007551,Lateolabrax_maculatus_GLEAN_10011357,Lateolabrax_maculatus_GLEAN_10011618,Lateolabrax_maculatus_GLEAN_10011614,Lateolabrax_maculatus_GLEAN_10013683,Lateolabrax_maculatus_GLEAN_10000935,Lateolabrax_maculatus_GLEAN_10017047,Lateolabrax_maculatus_GLEAN_1…
GO:0055001	muscle cell development	BP	8.41127e-07	5.44329e-05	12	199	136	13395	Over	5	Lateolabrax_maculatus_GLEAN_10001157,Lateolabrax_maculatus_GLEAN_10017588,Lateolabrax_maculatus_GLEAN_10020004,Lateolabrax_maculatus_GLEAN_10011357,Lateolabrax_maculatus_GLEAN_10014232,Lateolabrax_maculatus_GLEAN_10007018,Lateolabrax_maculatus_GLEAN_10011618,Lateolabrax_maculatus_GLEAN_10011614,Lateolabrax_maculatus_GLEAN_10013683,Lateolabrax_maculatus_GLEAN_10013776,Lateolabrax_maculatus_GLEAN_1…
GO:0060537	muscle tissue development	BP	1.37204e-06	8.28713e-05	15	332	136	13395	Over	5	Lateolabrax_maculatus_GLEAN_10001157,Lateolabrax_maculatus_GLEAN_10014232,Lateolabrax_maculatus_GLEAN_10010144,Lateolabrax_maculatus_GLEAN_10016321,Lateolabrax_maculatus_GLEAN_10007018,Lateolabrax_maculatus_GLEAN_10011618,Lateolabrax_maculatus_GLEAN_10001741,Lateolabrax_maculatus_GLEAN_10011614,Lateolabrax_maculatus_GLEAN_10013683,Lateolabrax_maculatus_GLEAN_10014804,Lateolabrax_maculatus_GLEAN_1…
GO:0016125	sterol metabolic process	BP	2.98266e-06	0.000163775	8	88	136	13395	Over	5	Lateolabrax_maculatus_GLEAN_10004923,Lateolabrax_maculatus_GLEAN_10004070,Lateolabrax_maculatus_GLEAN_10017138,Lateolabrax_maculatus_GLEAN_10016502,Lateolabrax_maculatus_GLEAN_10018186,Lateolabrax_maculatus_GLEAN_10003044,Lateolabrax_maculatus_GLEAN_10000028,Lateolabrax_maculatus_GLEAN_10015881
GO:0005856	cytoskeleton	CC	4.8701e-06	0.000220431	26	1086	136	13395	Over	5	Lateolabrax_maculatus_GLEAN_10001157,Lateolabrax_maculatus_GLEAN_10014793,Lateolabrax_maculatus_GLEAN_10017588,Lateolabrax_maculatus_GLEAN_10004167,Lateolabrax_maculatus_GLEAN_10023318,Lateolabrax_maculatus_GLEAN_10007551,Lateolabrax_maculatus_GLEAN_10004166,Lateolabrax_maculatus_GLEAN_10011357,Lateolabrax_maculatus_GLEAN_10014232,Lateolabrax_maculatus_GLEAN_10016321,Lateolabrax_maculatus_GLEAN_1…
GO:0030239	myofibril assembly	BP	4.98767e-06	0.000220431	7	67	136	13395	Over	5	Lateolabrax_maculatus_GLEAN_10001157,Lateolabrax_maculatus_GLEAN_10017588,Lateolabrax_maculatus_GLEAN_10011357,Lateolabrax_maculatus_GLEAN_10007018,Lateolabrax_maculatus_GLEAN_10013776,Lateolabrax_maculatus_GLEAN_10017047,Lateolabrax_maculatus_GLEAN_10019047
GO:0090257	regulation of muscle system process	BP	5.43079e-06	0.0002343	11	198	136	13395	Over	5	Lateolabrax_maculatus_GLEAN_10016321,Lateolabrax_maculatus_GLEAN_10011618,Lateolabrax_maculatus_GLEAN_10001741,Lateolabrax_maculatus_GLEAN_10011614,Lateolabrax_maculatus_GLEAN_10013776,Lateolabrax_maculatus_GLEAN_10009380,Lateolabrax_maculatus_GLEAN_10016494,Lateolabrax_maculatus_GLEAN_10019047,Lateolabrax_maculatus_GLEAN_10002007,Lateolabrax_maculatus_GLEAN_10018360,Lateolabrax_maculatus_GLEAN_1…

## Sheet: sail-up-only
GO_ID	GO_Term	GO_Class	Pvalue	AdjustedPv	x1	x2	n	N	EnrichDirect	GOlevl	GeneID
GO:0022857	transmembrane transporter activity	MF	0.00247028	0.179226	6	683	28	13395	Over	3	Lateolabrax_maculatus_GLEAN_10001916,Lateolabrax_maculatus_GLEAN_10015172,Lateolabrax_maculatus_GLEAN_10009623,Lateolabrax_maculatus_GLEAN_10019187,Lateolabrax_maculatus_GLEAN_10016275,Lateolabrax_maculatus_GLEAN_10006288
GO:0030427	site of polarized growth	CC	0.0349681	0.285499	1	17	28	13395	Over	3	Lateolabrax_maculatus_GLEAN_10009623
GO:0150034	distal axon	CC	0.0349681	0.285499	1	17	28	13395	Over	3	Lateolabrax_maculatus_GLEAN_10009623
GO:0044281	small molecule metabolic process	BP	0.0472873	0.313625	6	1292	28	13395	Over	3	Lateolabrax_maculatus_GLEAN_10019422,Lateolabrax_maculatus_GLEAN_10018232,Lateolabrax_maculatus_GLEAN_10001714,Lateolabrax_maculatus_GLEAN_10008095,Lateolabrax_maculatus_GLEAN_10015953,Lateolabrax_maculatus_GLEAN_10018303
GO:0043627	response to estrogen	BP	0.0493077	0.313625	2	171	28	13395	Over	3	Lateolabrax_maculatus_GLEAN_10018232,Lateolabrax_maculatus_GLEAN_10008095
GO:0042161	lipoprotein oxidation	BP	0.00833608	0.179226	1	4	28	13395	Over	4	Lateolabrax_maculatus_GLEAN_10015953
GO:0001539	cilium or flagellum-dependent cell motility	BP	0.0207147	0.262184	1	10	28	13395	Over	4	Lateolabrax_maculatus_GLEAN_10012904
GO:0015318	inorganic molecular entity transmembrane transporter activity	MF	0.0213987	0.262184	4	516	28	13395	Over	4	Lateolabrax_maculatus_GLEAN_10015172,Lateolabrax_maculatus_GLEAN_10009623,Lateolabrax_maculatus_GLEAN_10019187,Lateolabrax_maculatus_GLEAN_10006288
GO:0042887	amide transmembrane transporter activity	MF	0.0227632	0.262184	1	11	28	13395	Over	4	Lateolabrax_maculatus_GLEAN_10016275
GO:0015075	ion transmembrane transporter activity	MF	0.030363	0.280859	4	575	28	13395	Over	4	Lateolabrax_maculatus_GLEAN_10015172,Lateolabrax_maculatus_GLEAN_10009623,Lateolabrax_maculatus_GLEAN_10019187,Lateolabrax_maculatus_GLEAN_10006288
GO:0030426	growth cone	CC	0.0329442	0.285499	1	16	28	13395	Over	4	Lateolabrax_maculatus_GLEAN_10009623
GO:0051231	spindle elongation	BP	0.0349681	0.285499	1	17	28	13395	Over	4	Lateolabrax_maculatus_GLEAN_10018114
GO:0005975	carbohydrate metabolic process	BP	0.0365383	0.290953	3	353	28	13395	Over	4	Lateolabrax_maculatus_GLEAN_10001714,Lateolabrax_maculatus_GLEAN_10008095,Lateolabrax_maculatus_GLEAN_10015953
GO:1903578	regulation of ATP metabolic process	BP	0.0450264	0.308958	1	22	28	13395	Over	4	Lateolabrax_maculatus_GLEAN_10008095
GO:0051881	regulation of mitochondrial membrane potential	BP	0.00209033	0.179226	1	1	28	13395	Over	5	Lateolabrax_maculatus_GLEAN_10019422
GO:0006140	regulation of nucleotide metabolic process	BP	0.00377563	0.179226	2	44	28	13395	Over	5	Lateolabrax_maculatus_GLEAN_10019422,Lateolabrax_maculatus_GLEAN_10008095
GO:0000422	autophagy of mitochondrion	BP	0.00417645	0.179226	1	2	28	13395	Over	5	Lateolabrax_maculatus_GLEAN_10019422
GO:0044273	sulfur compound catabolic process	BP	0.00625836	0.179226	1	3	28	13395	Over	5	Lateolabrax_maculatus_GLEAN_10018232
GO:0034443	negative regulation of lipoprotein oxidation	BP	0.00833608	0.179226	1	4	28	13395	Over	5	Lateolabrax_maculatus_GLEAN_10015953
GO:0034442	regulation of lipoprotein oxidation	BP	0.00833608	0.179226	1	4	28	13395	Over	5	Lateolabrax_maculatus_GLEAN_10015953
GO:0050746	regulation of lipoprotein metabolic process	BP	0.00833608	0.179226	1	4	28	13395	Over	5	Lateolabrax_maculatus_GLEAN_10015953
GO:0050748	negative regulation of lipoprotein metabolic process	BP	0.00833608	0.179226	1	4	28	13395	Over	5	Lateolabrax_maculatus_GLEAN_10015953
GO:0046185	aldehyde catabolic process	BP	0.0104096	0.197476	1	5	28	13395	Over	5	Lateolabrax_maculatus_GLEAN_10018232
GO:0003096	renal sodium ion transport	BP	0.012479	0.217538	1	6	28	13395	Over	5	Lateolabrax_maculatus_GLEAN_10006288
GO:0032682	negative regulation of chemokine production	BP	0.0166051	0.250704	1	8	28	13395	Over	5	Lateolabrax_maculatus_GLEAN_10015953
GO:0006858	extracellular transport	BP	0.018662	0.250704	1	9	28	13395	Over	5	Lateolabrax_maculatus_GLEAN_10012904
GO:0009118	regulation of nucleoside metabolic process	BP	0.0227632	0.262184	1	11	28	13395	Over	5	Lateolabrax_maculatus_GLEAN_10019422
GO:0010508	positive regulation of autophagy	BP	0.0248077	0.275878	1	12	28	13395	Over	5	Lateolabrax_maculatus_GLEAN_10019422
GO:0042136	neurotransmitter biosynthetic process	BP	0.0248077	0.275878	1	12	28	13395	Over	5	Lateolabrax_maculatus_GLEAN_10018232

## Sheet: sail-down-only
GO_ID	GO_Term	GO_Class	Pvalue	AdjustedPv	x1	x2	n	N	EnrichDirect	GOlevl	GeneID
GO:0070085	glycosylation	BP	0.00144748	0.175791	5	234	48	13395	Over	3	Lateolabrax_maculatus_GLEAN_10004931,Lateolabrax_maculatus_GLEAN_10002778,Lateolabrax_maculatus_GLEAN_10006237,Lateolabrax_maculatus_GLEAN_10010535,Lateolabrax_maculatus_GLEAN_10007592
GO:0051234	establishment of localization	BP	0.00407431	0.240792	20	3103	48	13395	Over	3	Lateolabrax_maculatus_GLEAN_10002819,Lateolabrax_maculatus_GLEAN_10003364,Lateolabrax_maculatus_GLEAN_10006049,Lateolabrax_maculatus_GLEAN_10009904,Lateolabrax_maculatus_GLEAN_10005245,Lateolabrax_maculatus_GLEAN_10013752,Lateolabrax_maculatus_GLEAN_10013677,Lateolabrax_maculatus_GLEAN_10017728,Lateolabrax_maculatus_GLEAN_10011128,Lateolabrax_maculatus_GLEAN_10007091,Lateolabrax_maculatus_GLEAN_1…
GO:0140352	export from cell	BP	0.00516392	0.257288	6	450	48	13395	Over	3	Lateolabrax_maculatus_GLEAN_10002819,Lateolabrax_maculatus_GLEAN_10006049,Lateolabrax_maculatus_GLEAN_10017728,Lateolabrax_maculatus_GLEAN_10015591,Lateolabrax_maculatus_GLEAN_10008675,Lateolabrax_maculatus_GLEAN_10008404
GO:1904951	positive regulation of establishment of protein localization	BP	0.0127715	0.312101	2	48	48	13395	Over	3	Lateolabrax_maculatus_GLEAN_10002819,Lateolabrax_maculatus_GLEAN_10015591
GO:0038023	signaling receptor activity	MF	0.0155661	0.326009	7	740	48	13395	Over	3	Lateolabrax_maculatus_GLEAN_10017062,Lateolabrax_maculatus_GLEAN_10006049,Lateolabrax_maculatus_GLEAN_10005245,Lateolabrax_maculatus_GLEAN_10013752,Lateolabrax_maculatus_GLEAN_10015591,Lateolabrax_maculatus_GLEAN_10010413,Lateolabrax_maculatus_GLEAN_10012495
GO:0035821	modulation of process of other organism	BP	0.017123	0.326009	2	56	48	13395	Over	3	Lateolabrax_maculatus_GLEAN_10002819,Lateolabrax_maculatus_GLEAN_10005245
GO:0099080	supramolecular complex	CC	0.0200779	0.326009	5	440	48	13395	Over	3	Lateolabrax_maculatus_GLEAN_10005841,Lateolabrax_maculatus_GLEAN_10003159,Lateolabrax_maculatus_GLEAN_10017728,Lateolabrax_maculatus_GLEAN_10003553,Lateolabrax_maculatus_GLEAN_10008675
GO:0051050	positive regulation of transport	BP	0.0209911	0.326009	4	295	48	13395	Over	3	Lateolabrax_maculatus_GLEAN_10002819,Lateolabrax_maculatus_GLEAN_10006049,Lateolabrax_maculatus_GLEAN_10005245,Lateolabrax_maculatus_GLEAN_10015591
GO:0031224	intrinsic component of membrane	CC	0.0295129	0.375686	18	3110	48	13395	Over	3	Lateolabrax_maculatus_GLEAN_10014438,Lateolabrax_maculatus_GLEAN_10017062,Lateolabrax_maculatus_GLEAN_10003364,Lateolabrax_maculatus_GLEAN_10006049,Lateolabrax_maculatus_GLEAN_10005245,Lateolabrax_maculatus_GLEAN_10013677,Lateolabrax_maculatus_GLEAN_10007091,Lateolabrax_maculatus_GLEAN_10008460,Lateolabrax_maculatus_GLEAN_10002778,Lateolabrax_maculatus_GLEAN_10006237,Lateolabrax_maculatus_GLEAN_1…
GO:0016458	gene silencing	BP	0.029559	0.375686	2	75	48	13395	Over	3	Lateolabrax_maculatus_GLEAN_10005841,Lateolabrax_maculatus_GLEAN_10003553
GO:0003823	antigen binding	MF	0.0318018	0.391559	1	9	48	13395	Over	3	Lateolabrax_maculatus_GLEAN_10021486
GO:0034518	RNA cap binding complex	CC	0.0352736	0.393334	1	10	48	13395	Over	3	Lateolabrax_maculatus_GLEAN_10005841
GO:0003682	chromatin binding	MF	0.0454706	0.393563	2	95	48	13395	Over	3	Lateolabrax_maculatus_GLEAN_10002819,Lateolabrax_maculatus_GLEAN_10008675
GO:0036464	cytoplasmic ribonucleoprotein granule	CC	0.000248458	0.131638	4	86	48	13395	Over	4	Lateolabrax_maculatus_GLEAN_10005841,Lateolabrax_maculatus_GLEAN_10003159,Lateolabrax_maculatus_GLEAN_10003553,Lateolabrax_maculatus_GLEAN_10008675
GO:0043413	macromolecule glycosylation	BP	0.00121652	0.175791	5	225	48	13395	Over	4	Lateolabrax_maculatus_GLEAN_10004931,Lateolabrax_maculatus_GLEAN_10002778,Lateolabrax_maculatus_GLEAN_10006237,Lateolabrax_maculatus_GLEAN_10010535,Lateolabrax_maculatus_GLEAN_10007592
GO:0035770	ribonucleoprotein granule	CC	0.00125332	0.175791	4	132	48	13395	Over	4	Lateolabrax_maculatus_GLEAN_10005841,Lateolabrax_maculatus_GLEAN_10003159,Lateolabrax_maculatus_GLEAN_10003553,Lateolabrax_maculatus_GLEAN_10008675
GO:0031047	gene silencing by RNA	BP	0.00185471	0.175791	2	18	48	13395	Over	4	Lateolabrax_maculatus_GLEAN_10005841,Lateolabrax_maculatus_GLEAN_10003553
GO:0016757	transferase activity, transferring glycosyl groups	MF	0.00197008	0.175791	5	251	48	13395	Over	4	Lateolabrax_maculatus_GLEAN_10004931,Lateolabrax_maculatus_GLEAN_10006237,Lateolabrax_maculatus_GLEAN_10011194,Lateolabrax_maculatus_GLEAN_10010535,Lateolabrax_maculatus_GLEAN_10007592
GO:0046887	positive regulation of hormone secretion	BP	0.0025283	0.175791	2	21	48	13395	Over	4	Lateolabrax_maculatus_GLEAN_10006049,Lateolabrax_maculatus_GLEAN_10015591
GO:0032940	secretion by cell	BP	0.00516392	0.257288	6	450	48	13395	Over	4	Lateolabrax_maculatus_GLEAN_10002819,Lateolabrax_maculatus_GLEAN_10006049,Lateolabrax_maculatus_GLEAN_10017728,Lateolabrax_maculatus_GLEAN_10015591,Lateolabrax_maculatus_GLEAN_10008675,Lateolabrax_maculatus_GLEAN_10008404
GO:0004888	transmembrane signaling receptor activity	MF	0.0054418	0.257288	7	605	48	13395	Over	4	Lateolabrax_maculatus_GLEAN_10017062,Lateolabrax_maculatus_GLEAN_10006049,Lateolabrax_maculatus_GLEAN_10005245,Lateolabrax_maculatus_GLEAN_10013752,Lateolabrax_maculatus_GLEAN_10015591,Lateolabrax_maculatus_GLEAN_10010413,Lateolabrax_maculatus_GLEAN_10012495
GO:1903532	positive regulation of secretion by cell	BP	0.0069386	0.281879	2	35	48	13395	Over	4	Lateolabrax_maculatus_GLEAN_10006049,Lateolabrax_maculatus_GLEAN_10015591
GO:0032278	positive regulation of gonadotropin secretion	BP	0.00715428	0.281879	1	2	48	13395	Over	4	Lateolabrax_maculatus_GLEAN_10006049
GO:0051817	modulation of process of other organism involved in symbiotic interaction	BP	0.00814231	0.310458	2	38	48	13395	Over	4	Lateolabrax_maculatus_GLEAN_10002819,Lateolabrax_maculatus_GLEAN_10005245
GO:0006810	transport	BP	0.0119769	0.312101	18	2889	48	13395	Over	4	Lateolabrax_maculatus_GLEAN_10002819,Lateolabrax_maculatus_GLEAN_10006049,Lateolabrax_maculatus_GLEAN_10009904,Lateolabrax_maculatus_GLEAN_10005245,Lateolabrax_maculatus_GLEAN_10013752,Lateolabrax_maculatus_GLEAN_10013677,Lateolabrax_maculatus_GLEAN_10017728,Lateolabrax_maculatus_GLEAN_10007091,Lateolabrax_maculatus_GLEAN_10004522,Lateolabrax_maculatus_GLEAN_10010477,Lateolabrax_maculatus_GLEAN_1…
GO:0051222	positive regulation of protein transport	BP	0.0127715	0.312101	2	48	48	13395	Over	4	Lateolabrax_maculatus_GLEAN_10002819,Lateolabrax_maculatus_GLEAN_10015591
GO:0016032	viral process	BP	0.0134755	0.312101	4	258	48	13395	Over	4	Lateolabrax_maculatus_GLEAN_10002819,Lateolabrax_maculatus_GLEAN_10009904,Lateolabrax_maculatus_GLEAN_10005245,Lateolabrax_maculatus_GLEAN_10006452
GO:0006970	response to osmotic stress	BP	0.013807	0.312101	2	50	48	13395	Over	4	Lateolabrax_maculatus_GLEAN_10017062,Lateolabrax_maculatus_GLEAN_10013677
GO:0003779	actin binding	MF	0.000360801	0.131638	5	172	48	13395	Over	5	Lateolabrax_maculatus_GLEAN_10003257,Lateolabrax_maculatus_GLEAN_10017728,Lateolabrax_maculatus_GLEAN_10017364,Lateolabrax_maculatus_GLEAN_10004522,Lateolabrax_maculatus_GLEAN_10012578
GO:0009100	glycoprotein metabolic process	BP	0.000965476	0.175791	6	322	48	13395	Over	5	Lateolabrax_maculatus_GLEAN_10004931,Lateolabrax_maculatus_GLEAN_10002778,Lateolabrax_maculatus_GLEAN_10006237,Lateolabrax_maculatus_GLEAN_10011194,Lateolabrax_maculatus_GLEAN_10010535,Lateolabrax_maculatus_GLEAN_10007592
GO:0006486	protein glycosylation	BP	0.00121652	0.175791	5	225	48	13395	Over	5	Lateolabrax_maculatus_GLEAN_10004931,Lateolabrax_maculatus_GLEAN_10002778,Lateolabrax_maculatus_GLEAN_10006237,Lateolabrax_maculatus_GLEAN_10010535,Lateolabrax_maculatus_GLEAN_10007592
GO:1901566	organonitrogen compound biosynthetic process	BP	0.0015844	0.175791	10	942	48	13395	Over	5	Lateolabrax_maculatus_GLEAN_10004931,Lateolabrax_maculatus_GLEAN_10005841,Lateolabrax_maculatus_GLEAN_10003159,Lateolabrax_maculatus_GLEAN_10009904,Lateolabrax_maculatus_GLEAN_10003553,Lateolabrax_maculatus_GLEAN_10002778,Lateolabrax_maculatus_GLEAN_10006237,Lateolabrax_maculatus_GLEAN_10006452,Lateolabrax_maculatus_GLEAN_10010535,Lateolabrax_maculatus_GLEAN_10007592
GO:0019048	modulation by virus of host process	BP	0.0025283	0.175791	2	21	48	13395	Over	5	Lateolabrax_maculatus_GLEAN_10002819,Lateolabrax_maculatus_GLEAN_10005245
GO:0044003	modulation by symbiont of host process	BP	0.0025283	0.175791	2	21	48	13395	Over	5	Lateolabrax_maculatus_GLEAN_10002819,Lateolabrax_maculatus_GLEAN_10005245
GO:0034249	negative regulation of cellular amide metabolic process	BP	0.00330024	0.216716	2	24	48	13395	Over	5	Lateolabrax_maculatus_GLEAN_10005841,Lateolabrax_maculatus_GLEAN_10003553
GO:0008373	sialyltransferase activity	MF	0.00386847	0.24066	2	26	48	13395	Over	5	Lateolabrax_maculatus_GLEAN_10006237,Lateolabrax_maculatus_GLEAN_10011194
GO:1901137	carbohydrate derivative biosynthetic process	BP	0.00527548	0.257288	6	452	48	13395	Over	5	Lateolabrax_maculatus_GLEAN_10004931,Lateolabrax_maculatus_GLEAN_10002778,Lateolabrax_maculatus_GLEAN_10006237,Lateolabrax_maculatus_GLEAN_10011194,Lateolabrax_maculatus_GLEAN_10010535,Lateolabrax_maculatus_GLEAN_10007592
GO:0005840	ribosome	CC	0.00989033	0.312101	3	124	48	13395	Over	5	Lateolabrax_maculatus_GLEAN_10003159,Lateolabrax_maculatus_GLEAN_10009904,Lateolabrax_maculatus_GLEAN_10006452
GO:0010642	negative regulation of platelet-derived growth factor receptor signaling pathway	BP	0.0107126	0.312101	1	3	48	13395	Over	5	Lateolabrax_maculatus_GLEAN_10000518
GO:0010640	regulation of platelet-derived growth factor receptor signaling pathway	BP	0.0107126	0.312101	1	3	48	13395	Over	5	Lateolabrax_maculatus_GLEAN_10000518
GO:0006518	peptide metabolic process	BP	0.0142447	0.312101	5	403	48	13395	Over	5	Lateolabrax_maculatus_GLEAN_10005841,Lateolabrax_maculatus_GLEAN_10003159,Lateolabrax_maculatus_GLEAN_10009904,Lateolabrax_maculatus_GLEAN_10003553,Lateolabrax_maculatus_GLEAN_10006452
GO:0047484	regulation of response to osmotic stress	BP	0.0142584	0.312101	1	4	48	13395	Over	5	Lateolabrax_maculatus_GLEAN_10017062
GO:0106049	regulation of cellular response to osmotic stress	BP	0.0142584	0.312101	1	4	48	13395	Over	5	Lateolabrax_maculatus_GLEAN_10017062
