# Supplementary material for: Transcriptomic Modulation Reveals the Specific Cellular Response in Chinese Sea Bass (Lateolabrax maculatus) Gills under Salinity Change and Alkalinity Stress
Source: Int J Mol Sci. 2023 Mar 20;24(6):5877. doi: 10.3390/ijms24065877 (PMC10056482; doi:10.3390/ijms24065877)
Supplement: Supplementary file 1 [file ijms-24-05877-s001.zip › Table S3.WGCNA info.xlsx]

## Sheet: WGCNA 23 module info
	color	modulesize	numberofgenesinthebg
1	black	1331	16864
2	blue	2938	16864
3	brown	2355	16864
4	cyan	302	16864
5	darkgreen	104	16864
6	darkred	117	16864
7	darkturquoise	71	16864
8	green	1699	16864
9	greenyellow	383	16864
10	grey60	189	16864
11	lightcyan	230	16864
12	lightgreen	185	16864
13	lightyellow	137	16864
14	magenta	530	16864
15	midnightblue	258	16864
16	pink	581	16864
17	purple	509	16864
18	red	1601	16864
19	royalblue	122	16864
20	salmon	327	16864
21	tan	381	16864
22	turquoise	700	16864
23	yellow	1814	16864

## Sheet: WGCNA 23 module gene info
probes	moduleColor	connectivity...2.	altname	swissprot	0-12-up-red	0-24-up-brown	0-72-up-blue
Lateolabrax_maculatus_GLEAN_10003980	black	55.9156	ARHGDIA	Rho GDP dissociation inhibitor (GDI) alpha	#N/A	#N/A	#N/A
Lateolabrax_maculatus_GLEAN_10016626	black	55.596	INPP5A	Inositol polyphosphate-5-phosphatase, 40kDa	#N/A	#N/A	#N/A
Lateolabrax_maculatus_GLEAN_10020063	black	53.5304	-	carbohydrate binding	#N/A	#N/A	#N/A
Lateolabrax_maculatus_GLEAN_10015220	black	51.7704	PMM2	Involved in the synthesis of the GDP-mannose and dolichol-phosphate-mannose required for a number of critical mannosyl transfer reactions	#N/A	#N/A	#N/A
Lateolabrax_maculatus_GLEAN_10010168	black	51.7411	GRHL2	Grainyhead-like 2b (Drosophila)	#N/A	#N/A	#N/A
Lateolabrax_maculatus_GLEAN_10004223	black	50.4506	EML1	Echinoderm microtubule associated protein like 1	#N/A	#N/A	#N/A
Lateolabrax_maculatus_GLEAN_10001093	black	48.6461	CHMP2B	Charged multivesicular body protein	#N/A	#N/A	#N/A
Lateolabrax_maculatus_GLEAN_10006587	black	48.2312	BRCA2	Breast cancer	#N/A	#N/A	#N/A
Lateolabrax_maculatus_GLEAN_10014273	black	48.13	PPP2R2A	regulatory subunit B alpha	#N/A	#N/A	#N/A
Lateolabrax_maculatus_GLEAN_10011732	black	47.7141	OPHN1	Oligophrenin 1	#N/A	#N/A	#N/A
Lateolabrax_maculatus_GLEAN_10000797	black	47.6919	POU2F3	POU domain, class 2, transcription factor	#N/A	#N/A	#N/A
Lateolabrax_maculatus_GLEAN_10002698	black	47.4009	-	Cytokine receptor family member B17	#N/A	#N/A	#N/A
Lateolabrax_maculatus_GLEAN_10006482	black	47.1974	HOMER2	Homer homolog 2 (Drosophila)	#N/A	#N/A	#N/A
Lateolabrax_maculatus_GLEAN_10005621	black	47.0252	GNA14	Guanine nucleotide binding protein (G protein), alpha	#N/A	#N/A	#N/A
Lateolabrax_maculatus_GLEAN_10009258	black	46.7408	FGD6	FYVE, RhoGEF and PH	#N/A	#N/A	#N/A
Lateolabrax_maculatus_GLEAN_10014487	black	46.6282	INPP5B	Inositol polyphosphate-5-phosphatase B	#N/A	#N/A	#N/A
Lateolabrax_maculatus_GLEAN_10019135	black	46.5265	MLEC	Malectin	#N/A	#N/A	#N/A
Lateolabrax_maculatus_GLEAN_10006358	black	46.3621	SEMA4D	Sema domain, immunoglobulin domain (Ig), transmembrane domain (TM) and short cytoplasmic domain, (semaphorin) 4D	#N/A	#N/A	#N/A
Lateolabrax_maculatus_GLEAN_10018512	black	46.1401	ERCC6L2	Excision repair cross-complementation group 6-like 2	#N/A	#N/A	#N/A
Lateolabrax_maculatus_GLEAN_10005416	black	46.0835	-	Ras-related protein Rab-35-like	#N/A	#N/A	#N/A
Lateolabrax_maculatus_GLEAN_10004487	black	45.8281	NCL	Nucleolin	#N/A	#N/A	#N/A
Lateolabrax_maculatus_GLEAN_10008570	black	44.9437	RBBP6	Retinoblastoma binding protein 6	#N/A	#N/A	#N/A
Lateolabrax_maculatus_GLEAN_10016840	black	44.913	CRELD1	Cysteine-rich with EGF-like	#N/A	#N/A	#N/A
Lateolabrax_maculatus_GLEAN_10010509	black	44.8328	mx1	Belongs to the TRAFAC class dynamin-like GTPase superfamily. Dynamin Fzo YdjA family	#N/A	#N/A	#N/A
Lateolabrax_maculatus_GLEAN_10015237	black	44.7966	EFCAB7	EF-hand calcium binding domain 7	#N/A	#N/A	#N/A
Lateolabrax_maculatus_GLEAN_10016204	black	44.1612	ATP6V0A2	Essential component of the vacuolar proton pump (V- ATPase), a multimeric enzyme that catalyzes the translocation of protons across the membranes. Required for assembly and activity of the V-ATPase	#N/A	#N/A	#N/A
Lateolabrax_maculatus_GLEAN_10007242	black	43.8216	CTTN	cortactin	#N/A	#N/A	#N/A
Lateolabrax_maculatus_GLEAN_10018028	black	43.7284	UBE2D2	Belongs to the ubiquitin-conjugating enzyme family	#N/A	#N/A	#N/A
Lateolabrax_maculatus_GLEAN_10011831	black	43.7029	MYO9B	motor activity	#N/A	#N/A	#N/A
Lateolabrax_maculatus_GLEAN_10011045	black	43.3752	LARP7	La ribonucleoprotein domain family member 7	#N/A	#N/A	#N/A
Lateolabrax_maculatus_GLEAN_10010788	black	42.9962	MCTP2	Multiple C2 domains, transmembrane 2b	#N/A	#N/A	#N/A
Lateolabrax_maculatus_GLEAN_10022144	black	42.8358	-	Carcinoembryonic antigen-related cell adhesion molecule	#N/A	#N/A	#N/A
Lateolabrax_maculatus_GLEAN_10018418	black	42.7418	SNAP29	Synaptosomal-associated protein 29	#N/A	#N/A	#N/A
Lateolabrax_maculatus_GLEAN_10011957	black	42.5828	-	-	#N/A	#N/A	#N/A
Lateolabrax_maculatus_GLEAN_10006609	black	42.5377	PLCB3	Phospholipase C beta 3	#N/A	#N/A	#N/A
Lateolabrax_maculatus_GLEAN_10010507	black	42.5263	mx1	Belongs to the TRAFAC class dynamin-like GTPase superfamily. Dynamin Fzo YdjA family	#N/A	#N/A	#N/A
Lateolabrax_maculatus_GLEAN_10007979	black	42.4324	TWF1	Twinfilin, actin-binding protein, homolog	#N/A	#N/A	#N/A
Lateolabrax_maculatus_GLEAN_10007477	black	42.3133	CLUH	Clustered mitochondria (cluA CLU1) homolog	#N/A	#N/A	#N/A
Lateolabrax_maculatus_GLEAN_10018824	black	41.5083	CALU	Calumenin b	#N/A	#N/A	#N/A
Lateolabrax_maculatus_GLEAN_10004154	black	41.4674	-	Interleukin 4 receptor	#N/A	#N/A	#N/A
Lateolabrax_maculatus_GLEAN_10015843	black	41.3472	SLC38A5	Transmembrane amino acid transporter protein	#N/A	#N/A	#N/A
Lateolabrax_maculatus_GLEAN_10017123	black	41.3008	SYNCRIP	Synaptotagmin binding, cytoplasmic RNA interacting protein, like	#N/A	#N/A	#N/A
Lateolabrax_maculatus_GLEAN_10006707	black	40.9081	PRPF39	PRP39 pre-mRNA processing factor 39 homolog (yeast)	#N/A	#N/A	#N/A
Lateolabrax_maculatus_GLEAN_10012143	black	40.7793	CCDC125	Coiled-coil domain containing 125	#N/A	#N/A	#N/A
Lateolabrax_maculatus_GLEAN_10004243	black	40.5205	GRHL1	Grainyhead-like protein 1 homolog	#N/A	#N/A	#N/A
Lateolabrax_maculatus_GLEAN_10007065	black	40.3279	-	Si dkey-12j5.1	#N/A	#N/A	#N/A
Lateolabrax_maculatus_GLEAN_10017935	black	40.2927	ACAD9	acyl-CoA dehydrogenase family member 9	#N/A	#N/A	#N/A
Lateolabrax_maculatus_GLEAN_10006856	black	40.2314	BOD1L1	Biorientation of chromosomes in cell division	#N/A	#N/A	#N/A
Lateolabrax_maculatus_GLEAN_10009458	black	40.147	TOP2B	Control of topological states of DNA by transient breakage and subsequent rejoining of DNA strands. Topoisomerase II makes double-strand breaks	#N/A	#N/A	#N/A
Lateolabrax_maculatus_GLEAN_10018556	black	40.137	RASEF	RAS and EF-hand	#N/A	#N/A	#N/A
Lateolabrax_maculatus_GLEAN_10019040	black	40.1258	VAMP8	Vesicle-associated membrane protein	#N/A	#N/A	#N/A
Lateolabrax_maculatus_GLEAN_10005447	black	39.9284	ETF1	Eukaryotic translation termination factor 1	#N/A	#N/A	#N/A
Lateolabrax_maculatus_GLEAN_10014623	black	39.8528	SECISBP2L	SECIS binding protein 2-like	#N/A	#N/A	#N/A
Lateolabrax_maculatus_GLEAN_10008027	black	39.7422	CHMP1A	Charged multivesicular body protein	#N/A	#N/A	#N/A
Lateolabrax_maculatus_GLEAN_10002563	black	39.6365	TM9SF2	transmembrane 9 superfamily member	#N/A	#N/A	#N/A
Lateolabrax_maculatus_GLEAN_10003539	black	39.6308	SHROOM2	Shroom family member 2	#N/A	#N/A	#N/A
Lateolabrax_maculatus_GLEAN_10007799	black	39.5505	TFRC	Transferrin receptor	#N/A	#N/A	#N/A
Lateolabrax_maculatus_GLEAN_10007489	black	38.9947	MACC1	Metastasis associated in colon cancer 1	#N/A	#N/A	#N/A
Lateolabrax_maculatus_GLEAN_10008838	black	38.9046	SMC6	Structural maintenance of chromosomes	#N/A	#N/A	#N/A
Lateolabrax_maculatus_GLEAN_10005723	black	38.3125	TUFT1	Tuftelin 1a	#N/A	#N/A	#N/A
Lateolabrax_maculatus_GLEAN_10007597	black	38.2285	YES1	V-yes-1 Yamaguchi sarcoma viral oncogene homolog 1	#N/A	#N/A	#N/A
Lateolabrax_maculatus_GLEAN_10003264	black	38.1321	CASC5	Cancer susceptibility candidate 5	#N/A	#N/A	#N/A
Lateolabrax_maculatus_GLEAN_10014541	black	37.8243	C1GALT1C1	C1GALT1-specific chaperone 1	#N/A	#N/A	#N/A
Lateolabrax_maculatus_GLEAN_10002621	black	37.547	WIPF2	protein family, member 2	#N/A	#N/A	#N/A
Lateolabrax_maculatus_GLEAN_10003998	black	37.258	HN1L	Hematological and neurological expressed 1-like	#N/A	#N/A	#N/A
Lateolabrax_maculatus_GLEAN_10010803	black	36.9521	bcas1	sequence 1	#N/A	#N/A	#N/A
Lateolabrax_maculatus_GLEAN_10008509	black	36.9066	DPAGT1	Dolichyl-phosphate (UDP-N-acetylglucosamine) N-acetylglucosaminephosphotransferase 1 (GlcNAc-1-P transferase)	#N/A	#N/A	#N/A
Lateolabrax_maculatus_GLEAN_10020404	black	36.6861	GIMAP8	GTP binding	#N/A	#N/A	#N/A
Lateolabrax_maculatus_GLEAN_10003773	black	36.6209	ZCCHC8	Zinc finger CCHC	#N/A	#N/A	#N/A
Lateolabrax_maculatus_GLEAN_10016292	black	36.6137	PIP5K1B	Phosphatidylinositol-4-phosphate 5-kinase, type I, beta b	#N/A	#N/A	#N/A
Lateolabrax_maculatus_GLEAN_10011484	black	36.5183	-	H-2 class II histocompatibility antigen	#N/A	#N/A	#N/A
Lateolabrax_maculatus_GLEAN_10005172	black	36.3355	SUGP1	SURP and G patch domain containing 1	#N/A	#N/A	#N/A
Lateolabrax_maculatus_GLEAN_10002314	black	35.998	TRIOBP	TRIO and F-actin binding protein	#N/A	#N/A	#N/A
Lateolabrax_maculatus_GLEAN_10010560	black	35.6429	ZBTB21	Zinc finger and BTB domain containing 21	#N/A	#N/A	#N/A
Lateolabrax_maculatus_GLEAN_10009756	black	35.392	FER1L6	Fer-1-like family member 6	#N/A	#N/A	#N/A
Lateolabrax_maculatus_GLEAN_10013430	black	35.343	ATP6V1C1	Subunit of the peripheral V1 complex of vacuolar ATPase. Subunit C is necessary for the assembly of the catalytic sector of the enzyme and is likely to have a specific function in its catalytic activity. V-ATPase is responsible for acidifying a variety of intracellular compartments in eukaryotic cells	#N/A	#N/A	#N/A
Lateolabrax_maculatus_GLEAN_10006471	black	35.3273	MAPK6	mitogen-activated protein kinase	#N/A	#N/A	#N/A
Lateolabrax_maculatus_GLEAN_10015441	black	34.8465	AP2S1	Adaptor-related protein complex 2, sigma 1 subunit	#N/A	#N/A	#N/A
Lateolabrax_maculatus_GLEAN_10008525	black	34.7656	IL13RA2	Interleukin 13 receptor, alpha 2	#N/A	#N/A	#N/A
Lateolabrax_maculatus_GLEAN_10006981	black	34.3289	CCNL1	Belongs to the cyclin family	#N/A	#N/A	#N/A
Lateolabrax_maculatus_GLEAN_10005236	black	34.3258	TIMM44	Essential component of the PAM complex, a complex required for the translocation of transit peptide-containing proteins from the inner membrane into the mitochondrial matrix in an ATP-dependent manner	#N/A	#N/A	#N/A
Lateolabrax_maculatus_GLEAN_10019106	black	33.9001	FBRSL1	Autism susceptibility gene 2 protein-like	#N/A	#N/A	#N/A
Lateolabrax_maculatus_GLEAN_10018645	black	33.8418	IARS	Belongs to the class-I aminoacyl-tRNA synthetase family	#N/A	#N/A	#N/A
Lateolabrax_maculatus_GLEAN_10010035	black	33.7488	LRP3	lipoprotein receptor-related protein	#N/A	#N/A	#N/A
Lateolabrax_maculatus_GLEAN_10015898	black	33.7158	TMEM194A	Transmembrane protein 194A	#N/A	#N/A	#N/A
Lateolabrax_maculatus_GLEAN_10022203	black	33.7022	-	-	#N/A	#N/A	#N/A
Lateolabrax_maculatus_GLEAN_10001416	black	33.7016	CENPF	Centromere protein F	#N/A	#N/A	#N/A
Lateolabrax_maculatus_GLEAN_10001559	black	33.6487	-	Slc25a1 solute carrier family 25 (mitochondrial carrier	#N/A	#N/A	#N/A
Lateolabrax_maculatus_GLEAN_10008297	black	33.6009	MPP7	MAGUK p55 subfamily member 7	#N/A	#N/A	#N/A
Lateolabrax_maculatus_GLEAN_10015783	black	33.5968	HYOU1	Hypoxia up-regulated	#N/A	#N/A	#N/A
Lateolabrax_maculatus_GLEAN_10001420	black	33.5102	GOLPH3	Golgi phosphoprotein	#N/A	#N/A	#N/A
Lateolabrax_maculatus_GLEAN_10018311	black	33.4396	ANKRD13C	ankyrin repeat	#N/A	#N/A	#N/A
Lateolabrax_maculatus_GLEAN_10008492	black	32.9292	EDEM3	ER degradation enhancer, mannosidase alpha-like 3	#N/A	#N/A	#N/A
Lateolabrax_maculatus_GLEAN_10010010	black	32.707	-	AAA ATPase domain	#N/A	#N/A	#N/A
Lateolabrax_maculatus_GLEAN_10015195	black	32.6928	#N/A	#N/A	#N/A	#N/A	#N/A
Lateolabrax_maculatus_GLEAN_10015371	black	32.667	ACSL1	acyl-CoA synthetase long-chain family member	#N/A	#N/A	#N/A
Lateolabrax_maculatus_GLEAN_10016719	black	32.5922	F3	Coagulation factor IIIa	#N/A	#N/A	#N/A
Lateolabrax_maculatus_GLEAN_10007684	black	32.4226	-	-	#N/A	#N/A	#N/A
Lateolabrax_maculatus_GLEAN_10015377	black	32.0777	GLB1	Galactosidase, beta 1	#N/A	#N/A	#N/A
Lateolabrax_maculatus_GLEAN_10013736	black	31.9411	DDX1	DEAD (Asp-Glu-Ala-Asp) box polypeptide 1	#N/A	#N/A	#N/A
Lateolabrax_maculatus_GLEAN_10007345	black	31.9315	TDG	Thymine DNA	#N/A	#N/A	#N/A
Lateolabrax_maculatus_GLEAN_10022935	black	31.8956	P58IPK	Protein-kinase, interferon-inducible double stranded RNA dependent inhibitor	#N/A	#N/A	#N/A
Lateolabrax_maculatus_GLEAN_10014668	black	31.4168	CFDP1	RGD motif, leucine rich repeats, tropomodulin domain and proline-rich containing	#N/A	#N/A	#N/A
Lateolabrax_maculatus_GLEAN_10007347	black	31.2524	nucb2	Nucleobindin	#N/A	#N/A	#N/A
Lateolabrax_maculatus_GLEAN_10011766	black	31.2392	PLEKHS1	family S member 1	#N/A	#N/A	#N/A
Lateolabrax_maculatus_GLEAN_10017400	black	31.0795	chmp4b	Charged multivesicular body protein	#N/A	#N/A	#N/A
Lateolabrax_maculatus_GLEAN_10013723	black	30.6495	MYB	V-myb avian myeloblastosis viral oncogene homolog	#N/A	#N/A	#N/A
Lateolabrax_maculatus_GLEAN_10015774	black	30.5334	ALCAM	Activated leukocyte cell adhesion molecule a	#N/A	#N/A	#N/A
Lateolabrax_maculatus_GLEAN_10000073	black	30.4402	NENF	Belongs to the cytochrome b5 family	#N/A	#N/A	#N/A
Lateolabrax_maculatus_GLEAN_10008173	black	30.4303	GALNT3	Polypeptide N-acetylgalactosaminyltransferase 3	#N/A	#N/A	#N/A
Lateolabrax_maculatus_GLEAN_10017251	black	30.3607	KIAA1324	Si ch211-163l21.8	#N/A	#N/A	#N/A
Lateolabrax_maculatus_GLEAN_10016121	black	30.3534	MAPK12	mitogen-activated protein kinase	#N/A	#N/A	#N/A
Lateolabrax_maculatus_GLEAN_10011583	black	30.1538	SEC16A	Required for secretory cargo traffic from the endoplasmic reticulum to the Golgi apparatus and for normal transitional endoplasmic reticulum (tER) organization	#N/A	#N/A	#N/A
Lateolabrax_maculatus_GLEAN_10019017	black	30.0201	LMAN2L	Lectin, mannose-binding 2-like	#N/A	#N/A	#N/A
Lateolabrax_maculatus_GLEAN_10012402	black	29.9983	PKN3	Protein kinase N3	#N/A	#N/A	#N/A
Lateolabrax_maculatus_GLEAN_10010080	black	29.8487	AGPS	Catalyzes the exchange of an acyl for a long-chain alkyl group and the formation of the ether bond in the biosynthesis of ether phospholipids	#N/A	#N/A	#N/A
Lateolabrax_maculatus_GLEAN_10011946	black	29.6977	AKTIP	Belongs to the ubiquitin-conjugating enzyme family	#N/A	#N/A	#N/A
Lateolabrax_maculatus_GLEAN_10014154	black	29.0281	INF2	Inverted formin, FH2 and WH2 domain containing	#N/A	#N/A	#N/A
Lateolabrax_maculatus_GLEAN_10014131	black	28.9348	asap2	Arf-GAP with SH3 domain, ANK repeat and PH domain-containing protein	#N/A	#N/A	#N/A
Lateolabrax_maculatus_GLEAN_10013595	black	28.8976	-	G-protein coupled receptor family C group 6 member A-like	#N/A	#N/A	#N/A
Lateolabrax_maculatus_GLEAN_10003663	black	28.7617	SP110	Nuclear body protein	#N/A	#N/A	#N/A
Lateolabrax_maculatus_GLEAN_10008291	black	28.7076	-	Nuclear factor erythroid	#N/A	#N/A	#N/A
Lateolabrax_maculatus_GLEAN_10015430	black	28.5329	HS2ST1	Heparan sulfate 2-O-sulfotransferase	#N/A	#N/A	#N/A
Lateolabrax_maculatus_GLEAN_10010123	black	28.2876	prox1	homeobox	#N/A	#N/A	#N/A
Lateolabrax_maculatus_GLEAN_10005459	black	28.0544	FRMPD1	positive regulation of synapse structural plasticity	#N/A	#N/A	#N/A
Lateolabrax_maculatus_GLEAN_10003547	black	27.9431	REPS2	RALBP1 associated Eps domain containing 2	#N/A	#N/A	#N/A
Lateolabrax_maculatus_GLEAN_10004633	black	27.7931	PGM2	Phosphoglucomutase 2	#N/A	#N/A	#N/A
Lateolabrax_maculatus_GLEAN_10002653	black	27.7712	NPLOC4	Nuclear protein localization 4 homolog (S. cerevisiae)	#N/A	#N/A	#N/A
Lateolabrax_maculatus_GLEAN_10001240	black	27.6489	CPOX	Coproporphyrinogen oxidase	#N/A	#N/A	#N/A
Lateolabrax_maculatus_GLEAN_10020824	black	27.6122	-	H-2 class II histocompatibility antigen	#N/A	#N/A	#N/A
Lateolabrax_maculatus_GLEAN_10007290	black	27.3284	ATP6V1E1	ATPase, H -transporting, lysosomal, V1 subunit	#N/A	#N/A	#N/A
Lateolabrax_maculatus_GLEAN_10009593	black	27.2524	SCLY	Selenocysteine lyase	#N/A	#N/A	#N/A
Lateolabrax_maculatus_GLEAN_10019512	black	27.2138	#N/A	#N/A	#N/A	#N/A	#N/A
Lateolabrax_maculatus_GLEAN_10011937	black	27.0378	LPCAT2	Lysophosphatidylcholine acyltransferase 2	#N/A	#N/A	#N/A
Lateolabrax_maculatus_GLEAN_10016130	black	26.9655	-	dendrite self-avoidance	#N/A	#N/A	#N/A
Lateolabrax_maculatus_GLEAN_10020517	black	26.765	#N/A	#N/A	#N/A	#N/A	#N/A
Lateolabrax_maculatus_GLEAN_10013907	black	26.5907	#N/A	#N/A	#N/A	#N/A	#N/A
Lateolabrax_maculatus_GLEAN_10017031	black	26.5268	TRAF3IP2	TRAF3 interacting protein 2	#N/A	#N/A	#N/A
Lateolabrax_maculatus_GLEAN_10012932	black	26.4725	DEPDC1B	DEP domain containing 1B	#N/A	#N/A	#N/A
Lateolabrax_maculatus_GLEAN_10010593	black	26.1839	RUFY3	RUN and FYVE domain containing 3	#N/A	#N/A	#N/A
Lateolabrax_maculatus_GLEAN_10013220	black	25.9747	-	enhancer factor	#N/A	#N/A	#N/A
Lateolabrax_maculatus_GLEAN_10002635	black	25.7518	-	C-type lectin (CTL) or carbohydrate-recognition domain (CRD)	#N/A	#N/A	#N/A
Lateolabrax_maculatus_GLEAN_10012598	black	25.6673	ugt-50	Belongs to the UDP-glycosyltransferase family	#N/A	#N/A	#N/A
Lateolabrax_maculatus_GLEAN_10011492	black	25.5672	-	c-C chemokine receptor type	#N/A	#N/A	#N/A
Lateolabrax_maculatus_GLEAN_10002444	black	25.3099	MED10	Mediator of RNA polymerase II transcription, subunit	#N/A	#N/A	#N/A
Lateolabrax_maculatus_GLEAN_10015108	black	24.9174	SRP54	Binds to the signal sequence of presecretory protein when they emerge from the ribosomes and transfers them to TRAM (translocating chain-associating membrane protein)	#N/A	#N/A	#N/A
Lateolabrax_maculatus_GLEAN_10018571	black	24.864	-	Belongs to the peptidase S1 family	#N/A	#N/A	#N/A
Lateolabrax_maculatus_GLEAN_10015463	black	24.8288	MAP3K10	Mitogen-activated protein kinase kinase kinase	#N/A	#N/A	#N/A
Lateolabrax_maculatus_GLEAN_10012157	black	24.7762	ANKRD34B	ankyrin repeat	#N/A	#N/A	#N/A
Lateolabrax_maculatus_GLEAN_10001117	black	24.7149	KIAA1731	Centrosomal protein	#N/A	#N/A	#N/A
Lateolabrax_maculatus_GLEAN_10004596	black	24.4295	RAB3D	RAB3D, member RAS oncogene family	#N/A	#N/A	#N/A
Lateolabrax_maculatus_GLEAN_10002706	black	24.4053	ADORA1	Receptor for adenosine. The activity of this receptor is mediated by G proteins which inhibit adenylyl cyclase	#N/A	#N/A	#N/A
Lateolabrax_maculatus_GLEAN_10023081	black	24.36	HSPA4	Belongs to the heat shock protein 70 family	#N/A	#N/A	#N/A
Lateolabrax_maculatus_GLEAN_10013752	black	24.3511	-	receptor, family C, group 6, member	#N/A	#N/A	#N/A
Lateolabrax_maculatus_GLEAN_10008098	black	24.3106	slc4a4	Sodium bicarbonate cotransporter	#N/A	#N/A	#N/A
Lateolabrax_maculatus_GLEAN_10003267	black	24.2539	MTIF3	Mitochondrial translational initiation factor 3	#N/A	#N/A	#N/A
Lateolabrax_maculatus_GLEAN_10008528	black	24.234	DCX	Doublecortin	#N/A	#N/A	#N/A
Lateolabrax_maculatus_GLEAN_10009239	black	24.1472	-	Endonuclease domain containing 1	#N/A	#N/A	#N/A
Lateolabrax_maculatus_GLEAN_10009238	black	24.0471	-	Endonuclease domain-containing 1 protein-like	#N/A	#N/A	#N/A
Lateolabrax_maculatus_GLEAN_10023037	black	23.9839	PFKP	Catalyzes the phosphorylation of D-fructose 6-phosphate to fructose 1,6-bisphosphate by ATP, the first committing step of glycolysis	#N/A	#N/A	#N/A
Lateolabrax_maculatus_GLEAN_10006418	black	23.9386	TBC1D16	TBC1 domain family member	#N/A	#N/A	#N/A
Lateolabrax_maculatus_GLEAN_10000084	black	23.8726	DNAJB9	homolog subfamily B member	#N/A	#N/A	#N/A
Lateolabrax_maculatus_GLEAN_10016306	black	23.6464	-	Arrestin domain-containing protein 3-like	#N/A	#N/A	#N/A
Lateolabrax_maculatus_GLEAN_10006304	black	23.6283	ARHGEF40	rho guanine nucleotide exchange factor	#N/A	#N/A	#N/A
Lateolabrax_maculatus_GLEAN_10014231	black	23.5599	ZFAND5	zinc finger	#N/A	#N/A	#N/A
Lateolabrax_maculatus_GLEAN_10015683	black	23.3074	FAF1	Fas associated factor 1	#N/A	#N/A	#N/A
Lateolabrax_maculatus_GLEAN_10019781	black	23.2711	#N/A	#N/A	#N/A	#N/A	#N/A
Lateolabrax_maculatus_GLEAN_10019303	black	23.0942	NLRP12	NLRC3-like	#N/A	#N/A	#N/A
Lateolabrax_maculatus_GLEAN_10005838	black	23.0584	PDIA5	Protein disulfide isomerase family A, member 5	#N/A	#N/A	#N/A
Lateolabrax_maculatus_GLEAN_10007273	black	22.9908	KIAA1598	Si ch73-56p18.4	#N/A	#N/A	#N/A
Lateolabrax_maculatus_GLEAN_10017355	black	22.9759	TP73	Tumor protein p73	#N/A	#N/A	#N/A
Lateolabrax_maculatus_GLEAN_10016537	black	22.8794	PA2G4	Proliferation-associated	#N/A	#N/A	#N/A
Lateolabrax_maculatus_GLEAN_10011471	black	22.5595	-	-	#N/A	#N/A	#N/A
Lateolabrax_maculatus_GLEAN_10016505	black	22.4815	MOV10	Moloney leukemia virus 10, homolog	#N/A	#N/A	#N/A
Lateolabrax_maculatus_GLEAN_10014098	black	22.3837	SENP6	SUMO1 sentrin specific peptidase	#N/A	#N/A	#N/A
Lateolabrax_maculatus_GLEAN_10001355	black	22.2228	PLEKHA1	Pleckstrin homology domain containing, family A (phosphoinositide binding specific) member 1	#N/A	#N/A	#N/A
Lateolabrax_maculatus_GLEAN_10015077	black	22.0461	KIF4A	Belongs to the TRAFAC class myosin-kinesin ATPase superfamily. Kinesin family	#N/A	#N/A	#N/A
Lateolabrax_maculatus_GLEAN_10015090	black	21.5401	ZFPL1	Zinc finger protein-like 1	#N/A	#N/A	#N/A
Lateolabrax_maculatus_GLEAN_10004692	black	21.4946	P58IPK	Protein-kinase, interferon-inducible double stranded RNA dependent inhibitor	#N/A	#N/A	#N/A
Lateolabrax_maculatus_GLEAN_10010413	black	21.4632	VIPR1	Vasoactive intestinal	#N/A	#N/A	#N/A
Lateolabrax_maculatus_GLEAN_10004202	black	21.3755	PUS3	tRNA pseudouridine(38 39)	#N/A	#N/A	#N/A
Lateolabrax_maculatus_GLEAN_10013438	black	21.3082	TRIQK	Triple QxxK R	#N/A	#N/A	#N/A
Lateolabrax_maculatus_GLEAN_10009721	black	21.2586	SGOL2	Shugoshin C terminus	#N/A	#N/A	#N/A
Lateolabrax_maculatus_GLEAN_10015032	black	21.136	PROSER2	Proline and	#N/A	#N/A	#N/A
Lateolabrax_maculatus_GLEAN_10013560	black	21.0931	-	E3 ubiquitin-protein ligase	#N/A	#N/A	#N/A
Lateolabrax_maculatus_GLEAN_10008996	black	21.0101	ELP5	Elongator acetyltransferase complex subunit 5	#N/A	#N/A	#N/A
Lateolabrax_maculatus_GLEAN_10005734	black	20.9241	PCYOX1	Prenylcysteine oxidase 1	#N/A	#N/A	#N/A
Lateolabrax_maculatus_GLEAN_10014646	black	20.9081	CIRH1A	Cirrhosis, autosomal recessive 1A (cirhin)	#N/A	#N/A	#N/A
Lateolabrax_maculatus_GLEAN_10001137	black	20.8514	STAP2	Signal transducing adaptor family member	#N/A	#N/A	#N/A
Lateolabrax_maculatus_GLEAN_10008400	black	20.8317	EPS8L2	positive regulation of ruffle assembly	#N/A	#N/A	#N/A
Lateolabrax_maculatus_GLEAN_10007926	black	20.8093	RSAD2	Radical S-adenosyl methionine	#N/A	#N/A	#N/A
Lateolabrax_maculatus_GLEAN_10012075	black	20.8082	BIN3	Bridging integrator	#N/A	#N/A	#N/A
Lateolabrax_maculatus_GLEAN_10010680	black	20.7227	-	granzyme	#N/A	#N/A	#N/A
Lateolabrax_maculatus_GLEAN_10005554	black	20.6225	tmed1	Transmembrane emp24 protein transport domain containing 1a	0.04	#N/A	#N/A
Lateolabrax_maculatus_GLEAN_10016962	black	20.4548	#N/A	#N/A	#N/A	#N/A	#N/A
Lateolabrax_maculatus_GLEAN_10007445	black	20.4046	ADAMTS8	ADAM metallopeptidase with thrombospondin type 1 motif	#N/A	#N/A	#N/A
Lateolabrax_maculatus_GLEAN_10007583	black	20.3647	-	Myeloid-associated differentiation marker-like protein	0.04	#N/A	#N/A
Lateolabrax_maculatus_GLEAN_10009078	black	20.3422	TTF2	transcription termination factor	#N/A	#N/A	#N/A
Lateolabrax_maculatus_GLEAN_10017545	black	20.3	TTLL5	Tubulin tyrosine ligase-like family, member 5	#N/A	#N/A	#N/A
Lateolabrax_maculatus_GLEAN_10016475	black	20.1871	TKTL2	Transketolase b	#N/A	#N/A	#N/A
Lateolabrax_maculatus_GLEAN_10010582	black	20.1735	-	Unc-13 homolog	#N/A	#N/A	#N/A
Lateolabrax_maculatus_GLEAN_10008196	black	20.0822	GALNT5	Polypeptide N-acetylgalactosaminyltransferase 5	#N/A	#N/A	#N/A
Lateolabrax_maculatus_GLEAN_10004639	black	20.0223	POLQ	Polymerase (DNA directed), theta	#N/A	#N/A	#N/A
Lateolabrax_maculatus_GLEAN_10014355	black	19.9178	-	FAM3C-like	#N/A	#N/A	#N/A
Lateolabrax_maculatus_GLEAN_10016869	black	19.8915	DBNDD2	Dysbindin (dystrobrevin binding protein 1) domain containing 2	#N/A	#N/A	#N/A
Lateolabrax_maculatus_GLEAN_10018420	black	19.8822	slc25a1	Tricarboxylate transport protein	#N/A	#N/A	#N/A
Lateolabrax_maculatus_GLEAN_10015444	black	19.8278	-	Reticulon 2a	#N/A	#N/A	#N/A
Lateolabrax_maculatus_GLEAN_10016484	black	19.7137	KCNA10	Potassium voltage-gated channel, shaker-related subfamily, member 10	#N/A	#N/A	#N/A
Lateolabrax_maculatus_GLEAN_10013791	black	19.6981	C9orf16	Chromosome 9 open reading frame 16	#N/A	#N/A	#N/A
Lateolabrax_maculatus_GLEAN_10012671	black	19.6395	SH3BP2	SH3-domain binding protein 2	#N/A	#N/A	#N/A
Lateolabrax_maculatus_GLEAN_10015825	black	19.5728	CHIT1	Belongs to the glycosyl hydrolase 18 family	#N/A	#N/A	#N/A
Lateolabrax_maculatus_GLEAN_10014586	black	19.5273	TRIP4	Thyroid hormone receptor interactor 4	#N/A	#N/A	#N/A
Lateolabrax_maculatus_GLEAN_10020005	black	19.4627	GPX1	Glutathione peroxidase	#N/A	#N/A	#N/A
Lateolabrax_maculatus_GLEAN_10005785	black	19.414	USO1	USO1 homolog, vesicle docking protein (yeast)	#N/A	#N/A	#N/A
Lateolabrax_maculatus_GLEAN_10013983	black	19.4006	PDIA2	Protein disulfide isomerase family A, member 2	#N/A	#N/A	#N/A
Lateolabrax_maculatus_GLEAN_10003194	black	19.3931	ZNF84	Zinc finger, C2H2 type	#N/A	#N/A	#N/A
Lateolabrax_maculatus_GLEAN_10008004	black	19.3272	-	Olfactomedin-like domains	#N/A	#N/A	#N/A
Lateolabrax_maculatus_GLEAN_10005200	black	19.2517	UNC93A	Unc-93 homolog A (C. elegans)	#N/A	#N/A	#N/A
Lateolabrax_maculatus_GLEAN_10011428	black	19.2034	-	Immunoglobulin heavy variable 1-4	#N/A	#N/A	#N/A
Lateolabrax_maculatus_GLEAN_10020365	black	19.1667	#N/A	#N/A	#N/A	#N/A	#N/A
Lateolabrax_maculatus_GLEAN_10019588	black	19.107	#N/A	#N/A	#N/A	#N/A	#N/A
Lateolabrax_maculatus_GLEAN_10013720	black	18.9806	TBPL1	TATA box-binding protein-like protein	#N/A	#N/A	#N/A
Lateolabrax_maculatus_GLEAN_10000617	black	18.9522	-	-	#N/A	#N/A	#N/A
Lateolabrax_maculatus_GLEAN_10022933	black	18.9294	SUGT1	SGT1, suppressor of G2 allele of SKP1 (S. cerevisiae)	#N/A	#N/A	#N/A
Lateolabrax_maculatus_GLEAN_10005992	black	18.8933	ELF3	E74-like factor 3 (ets domain transcription factor, epithelial-specific )	#N/A	#N/A	#N/A
Lateolabrax_maculatus_GLEAN_10003197	black	18.8813	-	Zinc finger protein	#N/A	#N/A	#N/A
Lateolabrax_maculatus_GLEAN_10015311	black	18.7839	GSG2	Germ cell associated 2 (haspin)	#N/A	#N/A	#N/A
Lateolabrax_maculatus_GLEAN_10017691	black	18.7398	CAPN14	Belongs to the peptidase C2 family	#N/A	#N/A	#N/A
Lateolabrax_maculatus_GLEAN_10000630	black	18.5663	SLC37A2	Solute carrier family 37 (glycerol-3-phosphate transporter), member 2	#N/A	#N/A	#N/A
Lateolabrax_maculatus_GLEAN_10018551	black	18.4759	FEM1C	Fem-1 homolog c	#N/A	#N/A	#N/A
Lateolabrax_maculatus_GLEAN_10019842	black	18.4592	-	Endonuclease/Exonuclease/phosphatase family	#N/A	#N/A	#N/A
Lateolabrax_maculatus_GLEAN_10012337	black	18.4303	-	Possible membrane-associated motif in LPS-induced tumor necrosis factor alpha factor (LITAF), also known as PIG7, and other animal proteins.	#N/A	#N/A	#N/A
Lateolabrax_maculatus_GLEAN_10004020	black	18.3261	SFXN2	Sideroflexin 2	#N/A	#N/A	#N/A
Lateolabrax_maculatus_GLEAN_10016717	black	18.3023	ABCD3	ATP-binding cassette sub-family D	#N/A	#N/A	#N/A
Lateolabrax_maculatus_GLEAN_10004144	black	18.2147	-	-	#N/A	#N/A	#N/A
Lateolabrax_maculatus_GLEAN_10009170	black	18.1807	BOP1	Component of the PeBoW complex, which is required for maturation of 28S and 5.8S ribosomal RNAs and formation of the 60S ribosome	#N/A	#N/A	#N/A
Lateolabrax_maculatus_GLEAN_10004577	black	18.1365	TRAPPC5	trafficking protein particle complex	#N/A	#N/A	#N/A
Lateolabrax_maculatus_GLEAN_10000873	black	18.0424	GK	glycerol	#N/A	#N/A	#N/A
Lateolabrax_maculatus_GLEAN_10001250	black	17.9886	IL17RA	Interleukin 17 receptor	#N/A	#N/A	#N/A
Lateolabrax_maculatus_GLEAN_10009196	black	17.8963	-	Zinc finger protein	#N/A	#N/A	#N/A
Lateolabrax_maculatus_GLEAN_10016985	black	17.845	FBL	Fibrillarin	#N/A	#N/A	#N/A
Lateolabrax_maculatus_GLEAN_10008088	black	17.8142	#N/A	#N/A	#N/A	#N/A	#N/A
Lateolabrax_maculatus_GLEAN_10019039	black	17.7355	NCAPH	Regulatory subunit of the condensin complex, a complex required for conversion of interphase chromatin into mitotic-like condense chromosomes	#N/A	#N/A	#N/A
Lateolabrax_maculatus_GLEAN_10003822	black	17.72	TLR5	Toll-like receptor	#N/A	#N/A	#N/A
Lateolabrax_maculatus_GLEAN_10014630	black	17.6621	MYEF2	Myelin expression factor 2	#N/A	#N/A	#N/A
Lateolabrax_maculatus_GLEAN_10023277	black	17.6594	#N/A	#N/A	#N/A	#N/A	#N/A
Lateolabrax_maculatus_GLEAN_10010909	black	17.598	RPN1	Essential subunit of the N-oligosaccharyl transferase (OST) complex which catalyzes the transfer of a high mannose oligosaccharide from a lipid-linked oligosaccharide donor to an asparagine residue within an Asn-X-Ser Thr consensus motif in nascent polypeptide chains	#N/A	#N/A	#N/A
Lateolabrax_maculatus_GLEAN_10016670	black	17.592	PCBD1	6-pyruvoyl-tetrahydropterin synthase dimerization cofactor of hepatocyte nuclear factor 1 alpha (TCF1)	#N/A	#N/A	#N/A
Lateolabrax_maculatus_GLEAN_10007568	black	17.5901	PTPRH	Receptor-type tyrosine-protein phosphatase	#N/A	#N/A	#N/A
Lateolabrax_maculatus_GLEAN_10002111	black	17.5512	-	Immunoglobulin	#N/A	#N/A	#N/A
Lateolabrax_maculatus_GLEAN_10016263	black	17.5337	TFIP11	Involved in pre-mRNA splicing, specifically in spliceosome disassembly during late-stage splicing events	#N/A	#N/A	#N/A
Lateolabrax_maculatus_GLEAN_10003391	black	17.4695	CCNF	Belongs to the cyclin family	#N/A	#N/A	#N/A
Lateolabrax_maculatus_GLEAN_10002661	black	17.4271	BAIAP2	Brain-specific angiogenesis inhibitor 1-associated protein	#N/A	#N/A	#N/A
Lateolabrax_maculatus_GLEAN_10002945	black	17.3858	-	Endonuclease domain containing 1	#N/A	#N/A	#N/A
Lateolabrax_maculatus_GLEAN_10014881	black	17.3752	DBT	Dihydrolipoamide acetyltransferase component of pyruvate dehydrogenase complex	#N/A	#N/A	#N/A
Lateolabrax_maculatus_GLEAN_10007434	black	17.3734	ARCN1	The coatomer is a cytosolic protein complex that binds to dilysine motifs and reversibly associates with Golgi non- clathrin-coated vesicles, which further mediate biosynthetic protein transport from the ER, via the Golgi up to the trans Golgi network. Coatomer complex is required for budding from Golgi membranes, and is essential for the retrograde Golgi-to-ER transport of dilysine-tagged protei…	#N/A	#N/A	#N/A
Lateolabrax_maculatus_GLEAN_10002874	black	17.3265	LYPLA2	Lysophospholipase II	#N/A	#N/A	#N/A
Lateolabrax_maculatus_GLEAN_10007651	black	17.1562	AMFR	Autocrine motility factor receptor, E3 ubiquitin protein ligase	#N/A	#N/A	#N/A
Lateolabrax_maculatus_GLEAN_10018840	black	17.1092	RBM28	RNA binding motif protein 28	#N/A	#N/A	#N/A
Lateolabrax_maculatus_GLEAN_10007390	black	17.0936	PPM1H	Protein phosphatase, Mg2 Mn2 dependent 1H	#N/A	#N/A	#N/A
Lateolabrax_maculatus_GLEAN_10021726	black	17.0213	-	PRY	#N/A	#N/A	#N/A
Lateolabrax_maculatus_GLEAN_10018498	black	17.0038	ZNF131	zinc finger protein 131	#N/A	#N/A	#N/A
Lateolabrax_maculatus_GLEAN_10021631	black	16.986	-	antigen binding	#N/A	#N/A	#N/A
Lateolabrax_maculatus_GLEAN_10011906	black	16.9478	SF3B3	Splicing factor 3b subunit	#N/A	#N/A	#N/A
Lateolabrax_maculatus_GLEAN_10011161	black	16.8598	DHX58	DEXH (Asp-Glu-X-His) box polypeptide 58	#N/A	#N/A	#N/A
Lateolabrax_maculatus_GLEAN_10021274	black	16.6872	-	carbohydrate binding	#N/A	#N/A	#N/A
Lateolabrax_maculatus_GLEAN_10014655	black	16.6778	DNAJC24	homolog, subfamily C, member 24	#N/A	#N/A	#N/A
Lateolabrax_maculatus_GLEAN_10010150	black	16.6506	FLVCR2	Feline leukemia virus subgroup C	#N/A	#N/A	#N/A
Lateolabrax_maculatus_GLEAN_10015631	black	16.5939	ATF6	Transcription factor	#N/A	#N/A	#N/A
Lateolabrax_maculatus_GLEAN_10012144	black	16.5138	RAD17	RAD17 checkpoint clamp loader component	#N/A	#N/A	#N/A
Lateolabrax_maculatus_GLEAN_10007288	black	16.4901	CECR1	Cat eye syndrome chromosome region, candidate 1b	#N/A	#N/A	#N/A
Lateolabrax_maculatus_GLEAN_10000808	black	16.4563	CCDC162P	Transmembrane protein FLJ37396	#N/A	#N/A	#N/A
Lateolabrax_maculatus_GLEAN_10019502	black	16.3847	-	DDE superfamily endonuclease	#N/A	#N/A	#N/A
Lateolabrax_maculatus_GLEAN_10008373	black	16.3539	MAP2K1	mitogen-activated protein kinase kinase	#N/A	#N/A	#N/A
Lateolabrax_maculatus_GLEAN_10020457	black	16.3054	-	Junctional sarcoplasmic reticulum protein	#N/A	#N/A	#N/A
Lateolabrax_maculatus_GLEAN_10010963	black	16.2698	GNL3L	Guanine nucleotide binding protein-like 3 (nucleolar)-like	#N/A	#N/A	#N/A
Lateolabrax_maculatus_GLEAN_10008002	black	16.2436	-	Olfactomedin-like domains	#N/A	#N/A	#N/A
Lateolabrax_maculatus_GLEAN_10013318	black	16.1852	-	Bulb-type mannose-specific lectin	#N/A	#N/A	#N/A
Lateolabrax_maculatus_GLEAN_10021149	black	16.1722	DNAJC5	DnaJ (Hsp40) homolog, subfamily C, member	#N/A	#N/A	#N/A
Lateolabrax_maculatus_GLEAN_10006799	black	16.1685	TTC29	tetratricopeptide repeat	#N/A	#N/A	#N/A
Lateolabrax_maculatus_GLEAN_10001476	black	16.0582	SART1	Squamous cell carcinoma antigen recognised by T cells	#N/A	#N/A	#N/A
Lateolabrax_maculatus_GLEAN_10022423	black	16.0519	-	Reverse transcriptase (RNA-dependent DNA polymerase)	#N/A	#N/A	#N/A
Lateolabrax_maculatus_GLEAN_10014258	black	16.0502	ENTPD2	Ectonucleoside triphosphate diphosphohydrolase	#N/A	#N/A	#N/A
Lateolabrax_maculatus_GLEAN_10004570	black	16.0089	FRMPD1	FERM and PDZ	#N/A	#N/A	#N/A
Lateolabrax_maculatus_GLEAN_10010589	black	15.9807	PPIL2	Peptidylprolyl isomerase (cyclophilin)-like 2	#N/A	#N/A	#N/A
Lateolabrax_maculatus_GLEAN_10009143	black	15.965	-	VPS10	#N/A	#N/A	#N/A
Lateolabrax_maculatus_GLEAN_10010421	black	15.9243	-	Zinc-binding domain present in Lin-11, Isl-1, Mec-3.	#N/A	#N/A	#N/A
Lateolabrax_maculatus_GLEAN_10018667	black	15.9204	CCDC114	Coiled-coil domain containing 114	#N/A	#N/A	#N/A
Lateolabrax_maculatus_GLEAN_10022846	black	15.8595	-	coreceptor activity involved in Wnt signaling pathway, planar cell polarity pathway	#N/A	#N/A	#N/A
Lateolabrax_maculatus_GLEAN_10007746	black	15.7878	LGALS3BP	Lectin, galactoside-binding, soluble, 3 binding protein	#N/A	#N/A	#N/A
Lateolabrax_maculatus_GLEAN_10014470	black	15.7878	GNL2	GTPase that associates with pre-60S ribosomal subunits in the nucleolus and is required for their nuclear export and maturation	#N/A	#N/A	#N/A
Lateolabrax_maculatus_GLEAN_10017688	black	15.6853	GNMT	Glycine N-methyltransferase	#N/A	#N/A	#N/A
Lateolabrax_maculatus_GLEAN_10019129	black	15.6641	PRKAB1	Protein kinase, AMP-activated, beta 1 non-catalytic subunit, b	#N/A	#N/A	#N/A
Lateolabrax_maculatus_GLEAN_10001984	black	15.662	-	Tetratricopeptide repeat	#N/A	#N/A	#N/A
Lateolabrax_maculatus_GLEAN_10007249	black	15.6116	EMC8	ER membrane protein complex subunit 8	#N/A	#N/A	#N/A
Lateolabrax_maculatus_GLEAN_10007196	black	15.5084	LEPREL2	Prolyl 3-hydroxylase 3	#N/A	#N/A	#N/A
Lateolabrax_maculatus_GLEAN_10016017	black	15.4843	UFL1	ligase 1	#N/A	#N/A	#N/A
Lateolabrax_maculatus_GLEAN_10013412	black	15.4315	MTERFD1	transcription termination factor 3	#N/A	#N/A	#N/A
Lateolabrax_maculatus_GLEAN_10016970	black	15.4261	CLEC12B	C-type lectin domain family	#N/A	#N/A	#N/A
Lateolabrax_maculatus_GLEAN_10016800	black	15.4192	-	Belongs to the intermediate filament family	#N/A	#N/A	#N/A
Lateolabrax_maculatus_GLEAN_10010072	black	15.3018	UGP2	UDP-glucose pyrophosphorylase 2b	#N/A	#N/A	#N/A
Lateolabrax_maculatus_GLEAN_10019070	black	15.2432	TIA1	Nucleolysin TIA-1 isoform	#N/A	#N/A	#N/A
Lateolabrax_maculatus_GLEAN_10017201	black	15.2026	ICOSLG	ICOS ligand	#N/A	#N/A	#N/A
Lateolabrax_maculatus_GLEAN_10018563	black	15.1975	C9orf64	Chromosome 9 open reading frame 64	#N/A	#N/A	#N/A
Lateolabrax_maculatus_GLEAN_10018730	black	15.1967	TEX264	Testis-expressed sequence 264	#N/A	#N/A	#N/A
Lateolabrax_maculatus_GLEAN_10014933	black	15.1778	SMKR1	endonucleolytic cleavage to generate mature 3'-end of SSU-rRNA from (SSU-rRNA, 5.8S rRNA, LSU-rRNA)	#N/A	#N/A	#N/A
Lateolabrax_maculatus_GLEAN_10008395	black	15.1034	IGHMBP2	Immunoglobulin mu binding protein 2	#N/A	#N/A	#N/A
Lateolabrax_maculatus_GLEAN_10003684	black	15.0792	TIMMDC1	Translocase of inner mitochondrial membrane	#N/A	#N/A	#N/A
Lateolabrax_maculatus_GLEAN_10006082	black	15.039	CDHR1	Cadherin-related family member	#N/A	#N/A	#N/A
Lateolabrax_maculatus_GLEAN_10007199	black	14.988	CLSTN3	Calsyntenin 3	#N/A	#N/A	#N/A
Lateolabrax_maculatus_GLEAN_10009195	black	14.9375	-	Zinc finger protein	#N/A	#N/A	#N/A
Lateolabrax_maculatus_GLEAN_10007683	black	14.9305	ZC3H12A	Ribonuclease ZC3H12A-like	#N/A	#N/A	#N/A
Lateolabrax_maculatus_GLEAN_10020649	black	14.9291	#N/A	#N/A	#N/A	#N/A	#N/A
Lateolabrax_maculatus_GLEAN_10021976	black	14.8833	-	Immunoglobulin V-Type	#N/A	#N/A	#N/A
Lateolabrax_maculatus_GLEAN_10009848	black	14.8507	TIRAP	Toll-interleukin 1 receptor (TIR) domain containing adaptor protein	#N/A	#N/A	#N/A
Lateolabrax_maculatus_GLEAN_10015801	black	14.743	AI413582	Small integral membrane protein 29	#N/A	#N/A	#N/A
Lateolabrax_maculatus_GLEAN_10001725	black	14.7197	MYO16	Belongs to the TRAFAC class myosin-kinesin ATPase superfamily. Myosin family	#N/A	#N/A	#N/A
Lateolabrax_maculatus_GLEAN_10018180	black	14.7184	-	Protocadherin 20	#N/A	#N/A	#N/A
Lateolabrax_maculatus_GLEAN_10013559	black	14.7106	-	E3 ubiquitin-protein ligase	#N/A	#N/A	#N/A
Lateolabrax_maculatus_GLEAN_10011521	black	14.6942	STX2	Belongs to the syntaxin family	#N/A	#N/A	#N/A
Lateolabrax_maculatus_GLEAN_10012215	black	14.6578	EZR	Ezrin-like	#N/A	#N/A	#N/A
Lateolabrax_maculatus_GLEAN_10012968	black	14.5804	-	Sulfotransferase family cytosolic 2B member 1-like	#N/A	#N/A	#N/A
Lateolabrax_maculatus_GLEAN_10009079	black	14.5577	CENPJ	Centromere protein J	#N/A	#N/A	#N/A
Lateolabrax_maculatus_GLEAN_10008493	black	14.5245	EDEM3	ER degradation enhancer, mannosidase alpha-like 3	#N/A	#N/A	#N/A
Lateolabrax_maculatus_GLEAN_10004752	black	14.5165	ACTN4	Actinin, alpha 4	#N/A	#N/A	#N/A
Lateolabrax_maculatus_GLEAN_10018800	black	14.4777	SYNM	Belongs to the intermediate filament family	#N/A	#N/A	#N/A
Lateolabrax_maculatus_GLEAN_10011763	black	14.4736	NRAP	Nebulin-related anchoring protein	#N/A	#N/A	#N/A
Lateolabrax_maculatus_GLEAN_10022508	black	14.4512	CLDN34	Claudin-3-like	#N/A	#N/A	#N/A
Lateolabrax_maculatus_GLEAN_10016490	black	14.3923	-	Transcription factor	#N/A	#N/A	#N/A
Lateolabrax_maculatus_GLEAN_10001427	black	14.3687	NXNL2	Nucleoredoxin-like 2	#N/A	#N/A	#N/A
Lateolabrax_maculatus_GLEAN_10011615	black	14.3529	MYH7	Belongs to the TRAFAC class myosin-kinesin ATPase superfamily. Myosin family	#N/A	#N/A	#N/A
Lateolabrax_maculatus_GLEAN_10016969	black	14.2977	CLEC12B	C-type lectin domain family	#N/A	#N/A	#N/A
Lateolabrax_maculatus_GLEAN_10006308	black	14.271	-	E3 ubiquitin-protein ligase TRIM39-like	#N/A	#N/A	#N/A
Lateolabrax_maculatus_GLEAN_10015152	black	14.1881	AKAP6	anchor protein 6	#N/A	#N/A	#N/A
Lateolabrax_maculatus_GLEAN_10000918	black	14.1078	tinf2	TERF1 (TRF1)-interacting nuclear factor 2	#N/A	#N/A	#N/A
Lateolabrax_maculatus_GLEAN_10017625	black	14.1048	NT5C1A	5'-nucleotidase, cytosolic IA	#N/A	#N/A	#N/A
Lateolabrax_maculatus_GLEAN_10022904	black	14.1042	SLC4A11	Solute carrier family 4, sodium borate transporter, member 11	#N/A	#N/A	#N/A
Lateolabrax_maculatus_GLEAN_10020773	black	14.0836	TXNDC11	Thioredoxin domain containing 11	#N/A	#N/A	#N/A
Lateolabrax_maculatus_GLEAN_10006605	black	14.0186	CHRM5	The muscarinic acetylcholine receptor mediates various cellular responses, including inhibition of adenylate cyclase, breakdown of phosphoinositides and modulation of potassium channels through the action of G proteins	#N/A	#N/A	#N/A
Lateolabrax_maculatus_GLEAN_10012264	black	13.9887	TRAM2	membrane protein 2	#N/A	#N/A	#N/A
Lateolabrax_maculatus_GLEAN_10005974	black	13.9809	IGFLR1	IGF-like family receptor 1	#N/A	#N/A	#N/A
Lateolabrax_maculatus_GLEAN_10006092	black	13.9559	ACADSB	acyl-CoA dehydrogenase, short branched chain	#N/A	#N/A	#N/A
Lateolabrax_maculatus_GLEAN_10002843	black	13.9372	NADSYN1	NAD synthetase 1	#N/A	#N/A	#N/A
Lateolabrax_maculatus_GLEAN_10007441	black	13.9287	POU2AF1	POU class 2 associating factor 1	#N/A	#N/A	#N/A
Lateolabrax_maculatus_GLEAN_10022258	black	13.9252	-	DNA binding	#N/A	#N/A	#N/A
Lateolabrax_maculatus_GLEAN_10019834	black	13.923	-	Reverse transcriptase (RNA-dependent DNA polymerase)	#N/A	#N/A	#N/A
Lateolabrax_maculatus_GLEAN_10007549	black	13.897	-	Si ch211-180a12.2	#N/A	#N/A	#N/A
Lateolabrax_maculatus_GLEAN_10001955	black	13.8855	tmem86b	Transmembrane protein 86B	#N/A	#N/A	#N/A
Lateolabrax_maculatus_GLEAN_10005204	black	13.8351	STXBP2	Belongs to the STXBP unc-18 SEC1 family	#N/A	#N/A	#N/A
Lateolabrax_maculatus_GLEAN_10010367	black	13.8306	dop-1	dopamine receptor	#N/A	#N/A	#N/A
Lateolabrax_maculatus_GLEAN_10001949	black	13.7955	SEZ6L2	Seizure related 6 homolog like 2	#N/A	#N/A	#N/A
Lateolabrax_maculatus_GLEAN_10005984	black	13.75	PON2	paraoxonase	#N/A	#N/A	#N/A
Lateolabrax_maculatus_GLEAN_10021848	black	13.7402	-	Immunoglobulin C-Type	#N/A	#N/A	#N/A
Lateolabrax_maculatus_GLEAN_10010611	black	13.736	FAM221A	Family with sequence similarity 221 member A	#N/A	#N/A	#N/A
Lateolabrax_maculatus_GLEAN_10018354	black	13.7288	CYP8B1	Cytochrome P450, family 8, subfamily B, polypeptide	#N/A	#N/A	#N/A
Lateolabrax_maculatus_GLEAN_10016720	black	13.7212	CNN3	negative regulation of ATPase activity	#N/A	#N/A	#N/A
Lateolabrax_maculatus_GLEAN_10008367	black	13.6743	PTPLAD1	Catalyzes the third of the four reactions of the long- chain fatty acids elongation cycle. This endoplasmic reticulum- bound enzymatic process, allows the addition of two carbons to the chain of long- and very long-chain fatty acids VLCFAs per cycle. This enzyme catalyzes the dehydration of the 3-hydroxyacyl-CoA intermediate into trans-2,3-enoyl-CoA, within each cycle of fatty acid elongation. Th…	#N/A	#N/A	#N/A
Lateolabrax_maculatus_GLEAN_10009846	black	13.6358	FAM118B	Family with sequence similarity 118 member B	#N/A	#N/A	#N/A
Lateolabrax_maculatus_GLEAN_10003985	black	13.6287	RAB37	Ras-related protein	#N/A	#N/A	#N/A
Lateolabrax_maculatus_GLEAN_10014427	black	13.6237	CD22	Si dkey-24p1.1	#N/A	#N/A	#N/A
Lateolabrax_maculatus_GLEAN_10009683	black	13.6164	-	small GTPase mediated signal transduction	#N/A	#N/A	#N/A
Lateolabrax_maculatus_GLEAN_10008243	black	13.5922	MAP10	Microtubule-associated protein 10	#N/A	#N/A	#N/A
Lateolabrax_maculatus_GLEAN_10013335	black	13.5606	TRAPPC9	trafficking protein particle complex	#N/A	#N/A	#N/A
Lateolabrax_maculatus_GLEAN_10000252	black	13.5403	SSRP1	Component of the FACT complex, a general chromatin factor that acts to reorganize nucleosomes. The FACT complex is involved in multiple processes that require DNA as a template such as mRNA elongation, DNA replication and DNA repair. During transcription elongation the FACT complex acts as a histone chaperone that both destabilizes and restores nucleosomal structure. It facilitates the passage of…	#N/A	#N/A	#N/A
Lateolabrax_maculatus_GLEAN_10012493	black	13.5319	TCTEX1D2	Tctex1 domain containing 2	#N/A	#N/A	#N/A
Lateolabrax_maculatus_GLEAN_10014205	black	13.5245	PI15	Peptidase inhibitor	#N/A	#N/A	#N/A
Lateolabrax_maculatus_GLEAN_10004397	black	13.4802	TATDN1	TatD DNase domain containing 1	#N/A	#N/A	#N/A
Lateolabrax_maculatus_GLEAN_10014306	black	13.4694	AFG3L2	Si ch1073-174d20.2	#N/A	#N/A	#N/A
Lateolabrax_maculatus_GLEAN_10003134	black	13.4183	RHOV	Belongs to the small GTPase superfamily. Rho family	#N/A	#N/A	#N/A
Lateolabrax_maculatus_GLEAN_10018403	black	13.3299	GCK	Glucokinase (hexokinase 4, maturity onset diabetes of the young 2)	#N/A	#N/A	#N/A
Lateolabrax_maculatus_GLEAN_10012719	black	13.3001	DARS	Aspartyl-tRNA synthetase	#N/A	#N/A	#N/A
Lateolabrax_maculatus_GLEAN_10006006	black	13.2947	EZR	Ezrin-like	#N/A	#N/A	#N/A
Lateolabrax_maculatus_GLEAN_10000086	black	13.2914	FGD4	FYVE, RhoGEF and PH	#N/A	#N/A	#N/A
Lateolabrax_maculatus_GLEAN_10005235	black	13.2857	HNRNPM	Heterogeneous nuclear ribonucleoprotein M	#N/A	#N/A	#N/A
Lateolabrax_maculatus_GLEAN_10017261	black	13.2642	-	-	#N/A	#N/A	#N/A
Lateolabrax_maculatus_GLEAN_10007191	black	13.2629	-	Si ch211-154o6.3	#N/A	#N/A	#N/A
Lateolabrax_maculatus_GLEAN_10010143	black	13.216	TMED10	Transmembrane emp24-like trafficking protein 10 (yeast)	#N/A	#N/A	#N/A
Lateolabrax_maculatus_GLEAN_10010065	black	13.1758	zag-1	positive regulation of lens fiber cell differentiation	#N/A	#N/A	#N/A
Lateolabrax_maculatus_GLEAN_10019413	black	13.1731	KATNBL1	KATNB1-like protein	#N/A	#N/A	#N/A
Lateolabrax_maculatus_GLEAN_10004429	black	13.1724	tatdn3	TatD DNase domain containing 3	#N/A	#N/A	#N/A
Lateolabrax_maculatus_GLEAN_10019037	black	13.1553	-	Zgc 110329	#N/A	#N/A	#N/A
Lateolabrax_maculatus_GLEAN_10002195	black	13.1196	ARHGAP19	Rho GTPase activating protein 19	#N/A	#N/A	#N/A
Lateolabrax_maculatus_GLEAN_10010200	black	13.1147	TTN	Titin-like	#N/A	#N/A	#N/A
Lateolabrax_maculatus_GLEAN_10018564	black	13.0885	HNRNPK	heterogeneous nuclear ribonucleoprotein	#N/A	#N/A	#N/A
Lateolabrax_maculatus_GLEAN_10005746	black	12.9638	FAM166B	Family with sequence similarity 166, member B	#N/A	#N/A	#N/A
Lateolabrax_maculatus_GLEAN_10013670	black	12.9442	TXNDC9	Thioredoxin domain containing 9	#N/A	#N/A	#N/A
Lateolabrax_maculatus_GLEAN_10002230	black	12.9374	FAM19A5	Family with sequence similarity 19 (chemokine (C-C motif)-like), member A5	#N/A	#N/A	#N/A
Lateolabrax_maculatus_GLEAN_10012495	black	12.9174	HTR3C	5-hydroxytryptamine receptor 3A-like	#N/A	#N/A	#N/A
Lateolabrax_maculatus_GLEAN_10022202	black	12.9055	-	-	#N/A	#N/A	#N/A
Lateolabrax_maculatus_GLEAN_10021083	black	12.9013	PEPD	Peptidase D	#N/A	#N/A	#N/A
Lateolabrax_maculatus_GLEAN_10008209	black	12.8929	CHCHD3	Component of the MICOS complex, a large protein complex of the mitochondrial inner membrane that plays crucial roles in the maintenance of crista junctions, inner membrane architecture, and formation of contact sites to the outer membrane	#N/A	#N/A	#N/A
Lateolabrax_maculatus_GLEAN_10001043	black	12.8733	CAD	Carbamoyl-phosphate synthetase 2, aspartate transcarbamylase, and dihydroorotase	#N/A	#N/A	#N/A
Lateolabrax_maculatus_GLEAN_10004300	black	12.8621	IK	IK cytokine	#N/A	#N/A	#N/A
Lateolabrax_maculatus_GLEAN_10004734	black	12.824	NCF2	Neutrophil cytosolic factor 2	#N/A	#N/A	#N/A
Lateolabrax_maculatus_GLEAN_10001501	black	12.7616	GANAB	Belongs to the glycosyl hydrolase 31 family	#N/A	#N/A	#N/A
Lateolabrax_maculatus_GLEAN_10003648	black	12.7302	PARP2	Poly (ADP-ribose) polymerase	#N/A	#N/A	#N/A
Lateolabrax_maculatus_GLEAN_10003433	black	12.7232	TRIM7	E3 ubiquitin-protein ligase	#N/A	#N/A	#N/A
Lateolabrax_maculatus_GLEAN_10009781	black	12.7208	CTNND2	Catenin (cadherin-associated protein), delta	#N/A	#N/A	#N/A
Lateolabrax_maculatus_GLEAN_10019594	black	12.675	-	Zgc 153126	#N/A	#N/A	#N/A
Lateolabrax_maculatus_GLEAN_10012595	black	12.6686	-	Immunoglobulin	0.04	#N/A	0.04
Lateolabrax_maculatus_GLEAN_10016295	black	12.6545	ANKDD1B	Ankyrin repeat and death	#N/A	#N/A	#N/A
Lateolabrax_maculatus_GLEAN_10017152	black	12.6497	-	Zgc 136439	#N/A	#N/A	#N/A
Lateolabrax_maculatus_GLEAN_10009437	black	12.6494	NOVA2	Neuro-oncological ventral antigen	#N/A	#N/A	#N/A
Lateolabrax_maculatus_GLEAN_10016439	black	12.6419	-	Zgc 162297	#N/A	#N/A	#N/A
Lateolabrax_maculatus_GLEAN_10000992	black	12.638	CCDC25	Coiled-coil domain containing 25	#N/A	#N/A	#N/A
Lateolabrax_maculatus_GLEAN_10021598	black	12.6342	-	Immunoglobulin V-set domain	#N/A	#N/A	#N/A
Lateolabrax_maculatus_GLEAN_10020078	black	12.6245	CRIPT	Cysteine-rich PDZ-binding protein	#N/A	#N/A	#N/A
Lateolabrax_maculatus_GLEAN_10020459	black	12.6037	UQCR11	ubiquinol-cytochrome-c reductase activity	#N/A	#N/A	#N/A
Lateolabrax_maculatus_GLEAN_10017712	black	12.6011	ERCC6	Excision repair cross-complementing rodent repair deficiency, complementation group 6	0.04	#N/A	#N/A
Lateolabrax_maculatus_GLEAN_10007403	black	12.5601	-	Vacuolar protein 8-like	#N/A	#N/A	#N/A
Lateolabrax_maculatus_GLEAN_10008147	black	12.5586	-	Type-2 ice-structuring protein-like	#N/A	#N/A	#N/A
Lateolabrax_maculatus_GLEAN_10019612	black	12.5352	CYP8B1	Cytochrome P450, family 8, subfamily B, polypeptide	#N/A	#N/A	#N/A
Lateolabrax_maculatus_GLEAN_10008983	black	12.5137	ARHGEF15	Rho guanine nucleotide exchange factor	#N/A	#N/A	#N/A
Lateolabrax_maculatus_GLEAN_10001387	black	12.494	SOWAHC	Sosondowah ankyrin repeat domain family	#N/A	#N/A	#N/A
Lateolabrax_maculatus_GLEAN_10022865	black	12.4868	NFIA	Recognizes and binds the palindromic sequence 5'- TTGGCNNNNNGCCAA-3' present in viral and cellular promoters and in the origin of replication of adenovirus type 2. These proteins are individually capable of activating transcription and replication	#N/A	#N/A	#N/A
Lateolabrax_maculatus_GLEAN_10015403	black	12.4726	TMCO1	Calcium-selective channel required to prevent calcium stores from overfilling	#N/A	#N/A	#N/A
Lateolabrax_maculatus_GLEAN_10012573	black	12.4526	WDR93	WD repeat domain 93	#N/A	#N/A	#N/A
Lateolabrax_maculatus_GLEAN_10018339	black	12.4388	CDK5	kinase 5	#N/A	#N/A	#N/A
Lateolabrax_maculatus_GLEAN_10001084	black	12.4208	FAM213A	Family with sequence similarity 213, member	#N/A	#N/A	#N/A
Lateolabrax_maculatus_GLEAN_10012947	black	12.415	TBC1D31	TBC1 domain family member 31	#N/A	#N/A	#N/A
Lateolabrax_maculatus_GLEAN_10005199	black	12.4001	UNC93A	Unc-93 homolog A (C. elegans)	#N/A	#N/A	#N/A
Lateolabrax_maculatus_GLEAN_10015412	black	12.3906	DR1	Down-regulator of transcription 1	#N/A	#N/A	#N/A
Lateolabrax_maculatus_GLEAN_10015370	black	12.3789	HELT	Hairy and enhancer of split-related protein	#N/A	#N/A	#N/A
Lateolabrax_maculatus_GLEAN_10019762	black	12.378	EPM2AIP1	general transcription factor II-I repeat domain-containing protein	#N/A	#N/A	#N/A
Lateolabrax_maculatus_GLEAN_10004553	black	12.3443	-	Ig heavy chain Mem5-like	#N/A	#N/A	#N/A
Lateolabrax_maculatus_GLEAN_10009130	black	12.3286	NELFE	Negative elongation factor	#N/A	#N/A	#N/A
Lateolabrax_maculatus_GLEAN_10020411	black	12.3258	-	Brambleberry	#N/A	#N/A	#N/A
Lateolabrax_maculatus_GLEAN_10020159	black	12.3176	-	Zgc 152968	#N/A	#N/A	#N/A
Lateolabrax_maculatus_GLEAN_10017856	black	12.2686	TRNT1	Belongs to the tRNA nucleotidyltransferase poly(A) polymerase family	#N/A	#N/A	#N/A
Lateolabrax_maculatus_GLEAN_10005147	black	12.174	CCL16	Intercrine alpha family (small cytokine C-X-C) (chemokine CXC).	#N/A	#N/A	#N/A
Lateolabrax_maculatus_GLEAN_10001831	black	12.1692	ALOXE3	Arachidonate lipoxygenase 3	#N/A	#N/A	#N/A
Lateolabrax_maculatus_GLEAN_10003990	black	12.166	NUDT9	Nudix (nucleoside diphosphate linked moiety X)-type motif 9	#N/A	#N/A	#N/A
Lateolabrax_maculatus_GLEAN_10021920	black	12.1275	#N/A	#N/A	#N/A	#N/A	#N/A
Lateolabrax_maculatus_GLEAN_10002730	black	12.1016	FAM160B2	Family with sequence similarity 160, member B2	#N/A	#N/A	#N/A
Lateolabrax_maculatus_GLEAN_10011879	black	12.0993	SEC24A	SEC24 homolog A, COPII coat complex component	#N/A	#N/A	#N/A
Lateolabrax_maculatus_GLEAN_10000843	black	12.0678	AP1S3	Adaptor-related protein complex 1, sigma 3 subunit	#N/A	#N/A	#N/A
Lateolabrax_maculatus_GLEAN_10009615	black	12.0598	CRYZL1	Crystallin, zeta (quinone reductase)-like 1	#N/A	#N/A	#N/A
Lateolabrax_maculatus_GLEAN_10013122	black	12.0471	LARP1B	La ribonucleoprotein domain family, member 1B	#N/A	#N/A	#N/A
Lateolabrax_maculatus_GLEAN_10002815	black	12.0286	HDHD2	Haloacid dehalogenase-like hydrolase	#N/A	#N/A	#N/A
Lateolabrax_maculatus_GLEAN_10008006	black	12.0174	-	Olfactomedin-like domains	#N/A	#N/A	#N/A
Lateolabrax_maculatus_GLEAN_10007592	black	12.0085	-	Glycosyltransferase family 18	#N/A	#N/A	#N/A
Lateolabrax_maculatus_GLEAN_10004765	black	12.0061	FAM46B	Family with sequence similarity 46, member Bb	#N/A	#N/A	#N/A
Lateolabrax_maculatus_GLEAN_10000806	black	11.9921	LACE1	Lactation elevated	#N/A	#N/A	#N/A
Lateolabrax_maculatus_GLEAN_10017309	black	11.9718	C1orf127	Chromosome 1 open reading frame 127	#N/A	#N/A	#N/A
Lateolabrax_maculatus_GLEAN_10004907	black	11.8889	GATB	Allows the formation of correctly charged Gln-tRNA(Gln) through the transamidation of misacylated Glu-tRNA(Gln) in the mitochondria. The reaction takes place in the presence of glutamine and ATP through an activated gamma-phospho-Glu- tRNA(Gln)	#N/A	#N/A	#N/A
Lateolabrax_maculatus_GLEAN_10012384	black	11.8784	PIP5KL1	5-kinase-like	#N/A	#N/A	#N/A
Lateolabrax_maculatus_GLEAN_10001816	black	11.8609	-	Huntingtin interacting protein 1 related	#N/A	#N/A	#N/A
Lateolabrax_maculatus_GLEAN_10004272	black	11.8431	DHCR7	7-dehydrocholesterol reductase	#N/A	#N/A	#N/A
Lateolabrax_maculatus_GLEAN_10019469	black	11.8003	-	Transposase	#N/A	#N/A	#N/A
Lateolabrax_maculatus_GLEAN_10019833	black	11.7861	ZCCHC3	zinc finger	#N/A	#N/A	#N/A
Lateolabrax_maculatus_GLEAN_10015762	black	11.7313	RIPPLY1	Transcription Regulator	#N/A	#N/A	#N/A
Lateolabrax_maculatus_GLEAN_10008963	black	11.7197	-	-	#N/A	#N/A	#N/A
Lateolabrax_maculatus_GLEAN_10006818	black	11.7161	-	Dachshund	#N/A	#N/A	#N/A
Lateolabrax_maculatus_GLEAN_10011614	black	11.7154	MYH7	Belongs to the TRAFAC class myosin-kinesin ATPase superfamily. Myosin family	#N/A	#N/A	#N/A
Lateolabrax_maculatus_GLEAN_10002365	black	11.714	ERO1L	ERO1-like (S. cerevisiae)	#N/A	#N/A	#N/A
Lateolabrax_maculatus_GLEAN_10007661	black	11.6969	OLAH	S-acyl fatty acid synthase thioesterase, medium	#N/A	#N/A	#N/A
Lateolabrax_maculatus_GLEAN_10016087	black	11.6784	AGK	Acylglycerol kinase	#N/A	#N/A	#N/A
Lateolabrax_maculatus_GLEAN_10023309	black	11.6727	-	-	#N/A	#N/A	#N/A
Lateolabrax_maculatus_GLEAN_10008598	black	11.664	TOMM20	Mitochondrial import receptor subunit TOM20 homolog	#N/A	#N/A	#N/A
Lateolabrax_maculatus_GLEAN_10002747	black	11.6191	PITRM1	Pitrilysin metalloproteinase 1	#N/A	#N/A	#N/A
Lateolabrax_maculatus_GLEAN_10018384	black	11.6171	SSX2IP	Synovial sarcoma, X breakpoint 2 interacting protein	#N/A	#N/A	#N/A
Lateolabrax_maculatus_GLEAN_10018185	black	11.6128	ZNF185	zinc finger protein	#N/A	#N/A	#N/A
Lateolabrax_maculatus_GLEAN_10007052	black	11.569	BCAT2	Branched chain aminotransferase 2, mitochondrial	#N/A	#N/A	#N/A
Lateolabrax_maculatus_GLEAN_10000068	black	11.5459	LMBRD2	LMBR1 domain containing 2a	#N/A	#N/A	#N/A
Lateolabrax_maculatus_GLEAN_10018340	black	11.5032	ABCB8	ATP-binding cassette, sub-family B (MDR TAP), member 8	#N/A	#N/A	#N/A
Lateolabrax_maculatus_GLEAN_10012053	black	11.4923	MOB4	MOB family member 4, phocein	#N/A	#N/A	#N/A
Lateolabrax_maculatus_GLEAN_10008755	black	11.47	-	Ephrin receptor ligand binding domain	#N/A	#N/A	#N/A
Lateolabrax_maculatus_GLEAN_10019701	black	11.4353	-	CAP_GLY	#N/A	#N/A	#N/A
Lateolabrax_maculatus_GLEAN_10007262	black	11.4098	YIPF4	Yip1 domain family member 4	#N/A	#N/A	#N/A
Lateolabrax_maculatus_GLEAN_10016825	black	11.3494	QARS	Belongs to the class-I aminoacyl-tRNA synthetase family	#N/A	#N/A	#N/A
Lateolabrax_maculatus_GLEAN_10022712	black	11.3235	RTP3	Receptor-transporting protein 3-like	#N/A	#N/A	#N/A
Lateolabrax_maculatus_GLEAN_10006736	black	11.3137	ZSWIM2	E3 ubiquitin-protein ligase ZSWIM2	#N/A	#N/A	#N/A
Lateolabrax_maculatus_GLEAN_10010210	black	11.2953	TTN	Immunoglobulin like	#N/A	#N/A	#N/A
Lateolabrax_maculatus_GLEAN_10017966	black	11.2479	CSNK2A1	casein kinase	#N/A	#N/A	#N/A
Lateolabrax_maculatus_GLEAN_10020260	black	11.2387	#N/A	#N/A	#N/A	#N/A	#N/A
Lateolabrax_maculatus_GLEAN_10012116	black	11.2306	PLA2G3	Phospholipase A2, group III	#N/A	#N/A	#N/A
Lateolabrax_maculatus_GLEAN_10008674	black	11.2116	EXOC1	Exocyst complex component 1	#N/A	#N/A	#N/A
Lateolabrax_maculatus_GLEAN_10013668	black	11.1949	AFF3	AF4 FMR2 family, member 3	#N/A	#N/A	#N/A
Lateolabrax_maculatus_GLEAN_10018758	black	11.1856	HDHD3	Haloacid dehalogenase-like hydrolase	#N/A	#N/A	#N/A
Lateolabrax_maculatus_GLEAN_10002092	black	11.1761	B3GNT3	UDP-GlcNAc betaGal beta-1,3-N-acetylglucosaminyltransferase	#N/A	#N/A	#N/A
Lateolabrax_maculatus_GLEAN_10007495	black	11.1645	FKBP14	FK506 binding protein 14	#N/A	#N/A	#N/A
Lateolabrax_maculatus_GLEAN_10005649	black	11.1257	NTAN1	N-terminal asparagine	#N/A	#N/A	#N/A
Lateolabrax_maculatus_GLEAN_10005704	black	11.1245	ABCB1	ATP-binding cassette, sub-family B (MDR TAP), member 4	#N/A	#N/A	#N/A
Lateolabrax_maculatus_GLEAN_10001274	black	11.1233	-	Chitin synthase	#N/A	#N/A	#N/A
Lateolabrax_maculatus_GLEAN_10021596	black	10.9905	-	Immunoglobulin V-set domain	#N/A	#N/A	#N/A
Lateolabrax_maculatus_GLEAN_10019904	black	10.8725	-	Reverse transcriptase (RNA-dependent DNA polymerase)	#N/A	#N/A	#N/A
Lateolabrax_maculatus_GLEAN_10018670	black	10.838	FAM213B	Family with sequence similarity 213 member B	#N/A	#N/A	#N/A
Lateolabrax_maculatus_GLEAN_10020144	black	10.8367	-	Reverse transcriptase (RNA-dependent DNA polymerase)	#N/A	#N/A	#N/A
Lateolabrax_maculatus_GLEAN_10013459	black	10.8294	CBX7	Chromobox homolog 7b	#N/A	0.04	#N/A
Lateolabrax_maculatus_GLEAN_10019089	black	10.8181	CDCA2	cell division	#N/A	#N/A	#N/A
Lateolabrax_maculatus_GLEAN_10013945	black	10.8134	NXPH1	May be signaling molecules that resemble neuropeptides	#N/A	#N/A	#N/A
Lateolabrax_maculatus_GLEAN_10009768	black	10.8081	-	Si ch73-250a16.5	#N/A	#N/A	#N/A
Lateolabrax_maculatus_GLEAN_10016994	black	10.7976	-	Receptor expression-enhancing protein	#N/A	#N/A	#N/A
Lateolabrax_maculatus_GLEAN_10018492	black	10.7641	FBXL17	F-box and leucine-rich repeat protein 17	#N/A	#N/A	#N/A
Lateolabrax_maculatus_GLEAN_10007767	black	10.7399	CCDC137	Coiled-coil domain containing 137	#N/A	#N/A	#N/A
Lateolabrax_maculatus_GLEAN_10000804	black	10.7377	tmem109	Negative regulator of p53/TP53	0.04	#N/A	#N/A
Lateolabrax_maculatus_GLEAN_10013935	black	10.726	SACM1L	SAC1 suppressor of actin mutations 1-like a (yeast)	#N/A	#N/A	#N/A
Lateolabrax_maculatus_GLEAN_10019761	black	10.7124	EPM2AIP1	general transcription factor II-I repeat domain-containing protein	#N/A	#N/A	#N/A
Lateolabrax_maculatus_GLEAN_10020739	black	10.7054	#N/A	#N/A	#N/A	#N/A	#N/A
Lateolabrax_maculatus_GLEAN_10020276	black	10.7026	-	Transposase	#N/A	#N/A	#N/A
Lateolabrax_maculatus_GLEAN_10014211	black	10.6826	CUNH8orf89	C8orf89 homolog	#N/A	#N/A	#N/A
Lateolabrax_maculatus_GLEAN_10004090	black	10.6761	-	Inosine-uridine preferring nucleoside hydrolase-like	#N/A	#N/A	#N/A
Lateolabrax_maculatus_GLEAN_10008343	black	10.6749	PDSS1	Prenyl (decaprenyl) diphosphate synthase, subunit 1	#N/A	#N/A	#N/A
Lateolabrax_maculatus_GLEAN_10002927	black	10.6385	-	coreceptor activity involved in Wnt signaling pathway, planar cell polarity pathway	#N/A	#N/A	#N/A
Lateolabrax_maculatus_GLEAN_10000810	black	10.632	TSEN54	tRNA splicing endonuclease 54 homolog (S. cerevisiae)	#N/A	#N/A	#N/A
Lateolabrax_maculatus_GLEAN_10012855	black	10.5687	-	Prostaglandin E receptor 4 (subtype EP4) c	#N/A	#N/A	#N/A
Lateolabrax_maculatus_GLEAN_10021542	black	10.546	NLRP12	NLRC3-like	#N/A	#N/A	#N/A
Lateolabrax_maculatus_GLEAN_10013050	black	10.5386	PRKX	Protein kinase, X-linked	#N/A	#N/A	#N/A
Lateolabrax_maculatus_GLEAN_10020234	black	10.5282	C6orf106	Chromosome 6 open reading frame 106	#N/A	#N/A	#N/A
Lateolabrax_maculatus_GLEAN_10002454	black	10.5213	FAR2	Catalyzes the reduction of fatty acyl-CoA to fatty alcohols	#N/A	#N/A	#N/A
Lateolabrax_maculatus_GLEAN_10019797	black	10.5122	#N/A	#N/A	#N/A	#N/A	#N/A
Lateolabrax_maculatus_GLEAN_10000196	black	10.506	-	Zgc 162144	#N/A	#N/A	#N/A
Lateolabrax_maculatus_GLEAN_10016686	black	10.5041	#N/A	#N/A	#N/A	#N/A	#N/A
Lateolabrax_maculatus_GLEAN_10018946	black	10.4905	LRRC4C	Leucine rich repeat containing 4C	#N/A	#N/A	#N/A
Lateolabrax_maculatus_GLEAN_10012927	black	10.4693	PLEC	Microtubule-actin cross-linking factor 1	#N/A	#N/A	#N/A
Lateolabrax_maculatus_GLEAN_10020814	black	10.4601	-	GTPase, IMAP family member	#N/A	#N/A	#N/A
Lateolabrax_maculatus_GLEAN_10016823	black	10.44	-	Receptor-type tyrosine-protein phosphatase	#N/A	#N/A	#N/A
Lateolabrax_maculatus_GLEAN_10017012	black	10.4148	-	Kelch-like ECH-associated protein	#N/A	#N/A	#N/A
Lateolabrax_maculatus_GLEAN_10000765	black	10.3994	APOL4	apolipoprotein	#N/A	#N/A	#N/A
Lateolabrax_maculatus_GLEAN_10004815	black	10.3695	ADGB	Belongs to the peptidase C2 family	#N/A	#N/A	#N/A
Lateolabrax_maculatus_GLEAN_10003724	black	10.3581	WDR6	WD repeat domain 6	#N/A	#N/A	#N/A
Lateolabrax_maculatus_GLEAN_10016223	black	10.3191	ALKBH2	alkB, alkylation repair homolog 2 (E. coli)	#N/A	#N/A	#N/A
Lateolabrax_maculatus_GLEAN_10001699	black	10.3159	ARIH2	Ariadne homolog 2 (Drosophila)	#N/A	#N/A	#N/A
Lateolabrax_maculatus_GLEAN_10006153	black	10.312	KCNH2	Potassium voltage-gated channel, subfamily H	#N/A	#N/A	#N/A
Lateolabrax_maculatus_GLEAN_10014536	black	10.2244	-	Belongs to the intermediate filament family	#N/A	#N/A	#N/A
Lateolabrax_maculatus_GLEAN_10010781	black	10.223	EPRS	glutamyl-prolyl-tRNA synthetase	#N/A	#N/A	#N/A
Lateolabrax_maculatus_GLEAN_10017676	black	10.217	RHCE	Belongs to the ammonium transporter (TC 2.A.49) family. Rh subfamily	#N/A	#N/A	#N/A
Lateolabrax_maculatus_GLEAN_10006325	black	10.1902	NOP16	NOP16 nucleolar protein homolog (yeast)	#N/A	#N/A	#N/A
Lateolabrax_maculatus_GLEAN_10000264	black	10.1804	SMTNL2	Smoothelin, like	#N/A	#N/A	#N/A
Lateolabrax_maculatus_GLEAN_10008981	black	10.1495	-	Wu fi38e01	#N/A	#N/A	#N/A
Lateolabrax_maculatus_GLEAN_10004276	black	10.1331	-	G-protein coupled receptor	#N/A	#N/A	#N/A
Lateolabrax_maculatus_GLEAN_10021484	black	10.1206	-	PRY	#N/A	#N/A	#N/A
Lateolabrax_maculatus_GLEAN_10010273	black	10.1105	MRPL47	ribosomal protein L47	#N/A	#N/A	#N/A
Lateolabrax_maculatus_GLEAN_10012620	black	10.1072	PIGR	polymeric immunoglobulin receptor	#N/A	#N/A	#N/A
Lateolabrax_maculatus_GLEAN_10019313	black	10.0916	GPATCH11	G patch domain-containing protein	#N/A	#N/A	#N/A
Lateolabrax_maculatus_GLEAN_10011720	black	10.0715	CCDC61	Coiled-coil domain containing 61	#N/A	#N/A	#N/A
Lateolabrax_maculatus_GLEAN_10002265	black	10.0525	METTL18	Methyltransferase like 18	#N/A	#N/A	#N/A
Lateolabrax_maculatus_GLEAN_10018847	black	10.0309	TMEM253	Si dkey-30c15.13	#N/A	#N/A	#N/A
Lateolabrax_maculatus_GLEAN_10006289	black	10.0302	-	carbohydrate binding	#N/A	#N/A	#N/A
Lateolabrax_maculatus_GLEAN_10006880	black	10.0287	DMC1	DMC1 dosage suppressor of mck1 homolog, meiosis-specific homologous recombination	#N/A	#N/A	#N/A
Lateolabrax_maculatus_GLEAN_10007069	black	10.0052	APCS	serum amyloid	#N/A	#N/A	#N/A
Lateolabrax_maculatus_GLEAN_10007293	black	10.0036	SPIC	Transcription factor	#N/A	#N/A	#N/A
Lateolabrax_maculatus_GLEAN_10020410	black	9.99346	#N/A	#N/A	#N/A	#N/A	#N/A
Lateolabrax_maculatus_GLEAN_10012954	black	9.97536	MRPL32	ribosomal protein L32	0.04	#N/A	#N/A
Lateolabrax_maculatus_GLEAN_10004221	black	9.96029	DEGS2	Degenerative spermatocyte homolog 2, lipid desaturase (Drosophila)	#N/A	#N/A	#N/A
Lateolabrax_maculatus_GLEAN_10007624	black	9.95912	ccdc24	coiled-coil domain-containing protein	#N/A	#N/A	#N/A
Lateolabrax_maculatus_GLEAN_10007055	black	9.93698	RUNDC1	RUN domain containing 1	#N/A	#N/A	#N/A
Lateolabrax_maculatus_GLEAN_10001782	black	9.93583	ABCA1	ATP-binding cassette sub-family A	#N/A	#N/A	#N/A
Lateolabrax_maculatus_GLEAN_10013739	black	9.92643	ITSN2	Intersectin	#N/A	#N/A	#N/A
Lateolabrax_maculatus_GLEAN_10013842	black	9.90627	TSTD2	Thiosulfate sulfurtransferase (rhodanese)-like	#N/A	#N/A	#N/A
Lateolabrax_maculatus_GLEAN_10022019	black	9.88695	-	Reverse transcriptase (RNA-dependent DNA polymerase)	#N/A	#N/A	#N/A
Lateolabrax_maculatus_GLEAN_10011969	black	9.87751	ZCCHC17	Zinc finger, CCHC domain containing 17	#N/A	#N/A	#N/A
Lateolabrax_maculatus_GLEAN_10020397	black	9.86309	-	Insulin receptor substrate	#N/A	#N/A	#N/A
Lateolabrax_maculatus_GLEAN_10003616	black	9.85344	RBX1	Ring-box 1, E3 ubiquitin protein ligase	#N/A	#N/A	#N/A
Lateolabrax_maculatus_GLEAN_10005900	black	9.84264	SECISBP2	SECIS binding protein 2	#N/A	#N/A	#N/A
Lateolabrax_maculatus_GLEAN_10003517	black	9.83544	TCTEX1D1	Tctex1 domain containing 1	#N/A	#N/A	#N/A
Lateolabrax_maculatus_GLEAN_10014340	black	9.83419	-	integrin	#N/A	#N/A	#N/A
Lateolabrax_maculatus_GLEAN_10015740	black	9.81194	lrit3	Leucine-rich repeat, immunoglobulin-like	#N/A	#N/A	#N/A
Lateolabrax_maculatus_GLEAN_10021522	black	9.79794	-	-	#N/A	#N/A	#N/A
Lateolabrax_maculatus_GLEAN_10012766	black	9.79059	DNAH7	heavy chain 7	#N/A	#N/A	#N/A
Lateolabrax_maculatus_GLEAN_10015406	black	9.78375	GLUL	glutamine	#N/A	#N/A	#N/A
Lateolabrax_maculatus_GLEAN_10008813	black	9.77097	-	integrin	#N/A	#N/A	#N/A
Lateolabrax_maculatus_GLEAN_10008974	black	9.74484	ACAP1	ArfGAP with coiled-coil, ankyrin repeat and PH domains 1	#N/A	#N/A	#N/A
Lateolabrax_maculatus_GLEAN_10001481	black	9.74252	TLL1	tolloid-like	#N/A	#N/A	0.04
Lateolabrax_maculatus_GLEAN_10019679	black	9.73942	mep1b	Meprin A	#N/A	#N/A	#N/A
Lateolabrax_maculatus_GLEAN_10006777	black	9.7378	RYR1	ryanodine receptor	#N/A	#N/A	#N/A
Lateolabrax_maculatus_GLEAN_10005971	black	9.71212	proser3	Proline and serine rich 3	#N/A	#N/A	#N/A
Lateolabrax_maculatus_GLEAN_10019837	black	9.7059	-	Reverse transcriptase (RNA-dependent DNA polymerase)	#N/A	#N/A	#N/A
Lateolabrax_maculatus_GLEAN_10000895	black	9.68419	-	Butyrophilin subfamily 1 member A1-like	#N/A	#N/A	#N/A
Lateolabrax_maculatus_GLEAN_10007950	black	9.68228	GDPD4	Glycerophosphodiester phosphodiesterase	#N/A	#N/A	#N/A
Lateolabrax_maculatus_GLEAN_10011586	black	9.64611	PDCL	Phosducin-like	#N/A	#N/A	#N/A
Lateolabrax_maculatus_GLEAN_10019048	black	9.63905	PPP1CC	Protein phosphatase 1, catalytic subunit, gamma isoform	#N/A	#N/A	#N/A
Lateolabrax_maculatus_GLEAN_10017096	black	9.62888	DCDC2B	Doublecortin domain containing 2B	#N/A	#N/A	#N/A
Lateolabrax_maculatus_GLEAN_10021788	black	9.60214	-	transposition, RNA-mediated	#N/A	#N/A	#N/A
Lateolabrax_maculatus_GLEAN_10015238	black	9.59815	ALG6	Asparagine-linked glycosylation 6 homolog (S. cerevisiae, alpha-1,3-glucosyltransferase)	#N/A	#N/A	#N/A
Lateolabrax_maculatus_GLEAN_10018985	black	9.5488	-	BCL (B-Cell lymphoma); contains BH1, BH2 regions	#N/A	#N/A	0.04
Lateolabrax_maculatus_GLEAN_10013929	black	9.54302	DDX39B	Spliceosome RNA helicase DDX39B-like	#N/A	#N/A	#N/A
Lateolabrax_maculatus_GLEAN_10022011	black	9.53703	NLRP12	NLRP3 inflammasome complex assembly	#N/A	#N/A	#N/A
Lateolabrax_maculatus_GLEAN_10015015	black	9.48619	CAND1	Cullin-associated and neddylation-dissociated 1	#N/A	#N/A	#N/A
Lateolabrax_maculatus_GLEAN_10017221	black	9.4811	MARCO	Macrophage receptor with collagenous structure	#N/A	#N/A	#N/A
Lateolabrax_maculatus_GLEAN_10023274	black	9.43057	COPZ2	Coatomer protein complex, subunit zeta 2	#N/A	#N/A	#N/A
Lateolabrax_maculatus_GLEAN_10003092	black	9.42708	RRAD	Ras-related associated with diabetes	#N/A	#N/A	#N/A
Lateolabrax_maculatus_GLEAN_10020348	black	9.41123	-	hAT family C-terminal dimerisation region	#N/A	#N/A	#N/A
Lateolabrax_maculatus_GLEAN_10008637	black	9.40788	VPS54	Vacuolar protein sorting 54 homolog (S. cerevisiae)	#N/A	#N/A	#N/A
Lateolabrax_maculatus_GLEAN_10011130	black	9.40194	SRCIN1	SRC kinase signaling inhibitor	#N/A	#N/A	#N/A
Lateolabrax_maculatus_GLEAN_10009879	black	9.37983	VIPR1	Vasoactive intestinal peptide receptor	#N/A	#N/A	#N/A
Lateolabrax_maculatus_GLEAN_10020012	black	9.36799	BLOC1S1	Biogenesis of lysosome-related organelles	#N/A	#N/A	#N/A
Lateolabrax_maculatus_GLEAN_10015162	black	9.32997	PPP2R5E	Protein phosphatase 2, regulatory subunit B', epsilon isoform	#N/A	#N/A	#N/A
Lateolabrax_maculatus_GLEAN_10013424	black	9.30625	RTP4	Receptor-transporting protein	#N/A	#N/A	#N/A
Lateolabrax_maculatus_GLEAN_10014895	black	9.30597	TPRKB	Belongs to the CGI121 TPRKB family	#N/A	#N/A	#N/A
Lateolabrax_maculatus_GLEAN_10015066	black	9.29456	-	Endonuclease domain containing 1	#N/A	#N/A	#N/A
Lateolabrax_maculatus_GLEAN_10001361	black	9.22775	CLDN7	Plays a major role in tight junction-specific obliteration of the intercellular space, through calcium- independent cell-adhesion activity	#N/A	#N/A	#N/A
Lateolabrax_maculatus_GLEAN_10016481	black	9.22434	-	Nerve growth factor a (beta polypeptide)	#N/A	#N/A	#N/A
Lateolabrax_maculatus_GLEAN_10005897	black	9.21968	MBOAT4	Membrane bound O-acyltransferase domain containing 4	#N/A	#N/A	#N/A
Lateolabrax_maculatus_GLEAN_10013633	black	9.18392	PPP2R3C	regulatory subunit B	#N/A	#N/A	#N/A
Lateolabrax_maculatus_GLEAN_10011987	black	9.17949	GALNT4	POC1 centriolar protein homolog B (Chlamydomonas), like	#N/A	#N/A	#N/A
Lateolabrax_maculatus_GLEAN_10022282	black	9.13755	TRBV6-1	Immunoglobulin V-set domain	#N/A	#N/A	#N/A
Lateolabrax_maculatus_GLEAN_10002727	black	9.11405	CARD9	Caspase recruitment domain family, member 9	#N/A	#N/A	#N/A
Lateolabrax_maculatus_GLEAN_10020085	black	9.10347	MRPL43	ribosomal protein L43	#N/A	#N/A	#N/A
Lateolabrax_maculatus_GLEAN_10016209	black	9.07491	-	Sodium- and chloride-dependent GABA transporter ine-like	#N/A	#N/A	#N/A
Lateolabrax_maculatus_GLEAN_10005890	black	9.03157	-	Cerebellin 18	#N/A	#N/A	#N/A
Lateolabrax_maculatus_GLEAN_10004648	black	9.03057	TRMT11	tRNA methyltransferase 11 homolog (S. cerevisiae)	#N/A	#N/A	#N/A
Lateolabrax_maculatus_GLEAN_10021358	black	9.00714	TMUB1	Transmembrane and ubiquitin-like	#N/A	#N/A	#N/A
Lateolabrax_maculatus_GLEAN_10006348	black	8.99445	RAD1	RAD1 homolog (S. pombe)	#N/A	#N/A	#N/A
Lateolabrax_maculatus_GLEAN_10000407	black	8.97858	GSTK1	Glutathione S-transferase kappa	#N/A	#N/A	#N/A
Lateolabrax_maculatus_GLEAN_10020096	black	8.97528	#N/A	#N/A	#N/A	#N/A	#N/A
Lateolabrax_maculatus_GLEAN_10020048	black	8.96631	#N/A	#N/A	#N/A	#N/A	#N/A
Lateolabrax_maculatus_GLEAN_10003101	black	8.96361	XDH	Xanthine dehydrogenase	#N/A	#N/A	#N/A
Lateolabrax_maculatus_GLEAN_10000335	black	8.94894	PLK1	Serine threonine-protein kinase	#N/A	#N/A	#N/A
Lateolabrax_maculatus_GLEAN_10014164	black	8.9221	AHSA1	Activator of 90 kDa heat shock protein ATPase homolog	#N/A	#N/A	#N/A
Lateolabrax_maculatus_GLEAN_10009739	black	8.89384	ETV5	ETS translocation variant	#N/A	#N/A	#N/A
Lateolabrax_maculatus_GLEAN_10014491	black	8.88459	BTN3A1	Butyrophilin subfamily 2 member A2-like	#N/A	#N/A	#N/A
Lateolabrax_maculatus_GLEAN_10013132	black	8.88112	FAM216A	FAM216B protein family	#N/A	#N/A	#N/A
Lateolabrax_maculatus_GLEAN_10002864	black	8.88005	CSRP2	Cysteine and glycine-rich protein 2	#N/A	#N/A	#N/A
Lateolabrax_maculatus_GLEAN_10009393	black	8.87573	MFSD12	major facilitator superfamily	#N/A	#N/A	#N/A
Lateolabrax_maculatus_GLEAN_10012062	black	8.85311	#N/A	#N/A	#N/A	#N/A	#N/A
Lateolabrax_maculatus_GLEAN_10016676	black	8.84705	FAM204A	Family with sequence similarity 204, member A	#N/A	#N/A	#N/A
Lateolabrax_maculatus_GLEAN_10007584	black	8.81013	-	membrane raft polarization	#N/A	#N/A	#N/A
Lateolabrax_maculatus_GLEAN_10001691	black	8.79135	CHRD	Belongs to the chordin family	#N/A	#N/A	#N/A
Lateolabrax_maculatus_GLEAN_10015455	black	8.79027	RELB	V-rel reticuloendotheliosis viral oncogene homolog B	#N/A	#N/A	#N/A
Lateolabrax_maculatus_GLEAN_10017841	black	8.79014	SPAST	Belongs to the AAA ATPase family	#N/A	#N/A	#N/A
Lateolabrax_maculatus_GLEAN_10021374	black	8.77657	-	Endonuclease/Exonuclease/phosphatase family	#N/A	#N/A	#N/A
Lateolabrax_maculatus_GLEAN_10021965	black	8.77106	-	Fc receptor-like protein	#N/A	#N/A	#N/A
Lateolabrax_maculatus_GLEAN_10008407	black	8.729	PIDD1	P53-induced death domain protein	#N/A	#N/A	#N/A
Lateolabrax_maculatus_GLEAN_10020962	black	8.71136	C18orf21	Chromosome 18 open reading frame 21	#N/A	#N/A	#N/A
Lateolabrax_maculatus_GLEAN_10007719	black	8.70699	PHLDB2	Pleckstrin homology-like domain, family B, member 2	#N/A	#N/A	#N/A
Lateolabrax_maculatus_GLEAN_10018263	black	8.67923	BCL2	Apoptosis regulator Bcl-2	#N/A	#N/A	#N/A
Lateolabrax_maculatus_GLEAN_10003906	black	8.67775	nkx2-3	homeobox protein	#N/A	#N/A	#N/A
Lateolabrax_maculatus_GLEAN_10014758	black	8.63734	GLB1L	Belongs to the glycosyl hydrolase 35 family	#N/A	#N/A	#N/A
Lateolabrax_maculatus_GLEAN_10000380	black	8.63334	#N/A	#N/A	#N/A	#N/A	#N/A
Lateolabrax_maculatus_GLEAN_10022653	black	8.62676	GPATCH3	G patch domain-containing protein	#N/A	#N/A	#N/A
Lateolabrax_maculatus_GLEAN_10013071	black	8.60944	DDX4	Belongs to the DEAD box helicase family	#N/A	#N/A	#N/A
Lateolabrax_maculatus_GLEAN_10020640	black	8.58503	FAM200A	Family with sequence similarity 200, member A	#N/A	#N/A	#N/A
Lateolabrax_maculatus_GLEAN_10009225	black	8.57288	RPGRIP1	Retinitis pigmentosa GTPase regulator interacting protein 1	#N/A	#N/A	#N/A
Lateolabrax_maculatus_GLEAN_10010711	black	8.56731	IL17F	Interleukin 17a	#N/A	#N/A	#N/A
Lateolabrax_maculatus_GLEAN_10005089	black	8.5206	DCST1	DC-STAMP domain containing 1	#N/A	#N/A	#N/A
Lateolabrax_maculatus_GLEAN_10008993	black	8.4779	EIF5A	eukaryotic translation initiation factor	#N/A	#N/A	#N/A
Lateolabrax_maculatus_GLEAN_10012377	black	8.46806	ARF1	phospholipase D activator activity	#N/A	#N/A	#N/A
Lateolabrax_maculatus_GLEAN_10020568	black	8.43475	ENPP7	nucleotide diphosphatase activity	#N/A	#N/A	#N/A
Lateolabrax_maculatus_GLEAN_10010914	black	8.41116	CIDEC	Cell death-inducing DFFA-like effector c	#N/A	#N/A	#N/A
Lateolabrax_maculatus_GLEAN_10016953	black	8.40563	-	Belongs to the semaphorin family	#N/A	#N/A	#N/A
Lateolabrax_maculatus_GLEAN_10002106	black	8.4016	ANKRD13B	Ankyrin repeat domain 13B	#N/A	#N/A	#N/A
Lateolabrax_maculatus_GLEAN_10018096	black	8.40098	ITK	IL2-inducible T-cell kinase	#N/A	#N/A	#N/A
Lateolabrax_maculatus_GLEAN_10017075	black	8.38806	TMEM30B	Transmembrane protein 30B	#N/A	#N/A	#N/A
Lateolabrax_maculatus_GLEAN_10011323	black	8.36532	ESRRG	Estrogen-related receptor gamma	#N/A	#N/A	#N/A
Lateolabrax_maculatus_GLEAN_10004209	black	8.35841	BTG4	B-cell translocation gene 4	#N/A	#N/A	#N/A
Lateolabrax_maculatus_GLEAN_10011476	black	8.35806	HN1	Hematological and neurological expressed	#N/A	#N/A	#N/A
Lateolabrax_maculatus_GLEAN_10005078	black	8.3379	ENY2	Transcription and mRNA export factor	#N/A	#N/A	#N/A
Lateolabrax_maculatus_GLEAN_10005707	black	8.32582	DBF4	DBF4 homolog	#N/A	#N/A	#N/A
Lateolabrax_maculatus_GLEAN_10011692	black	8.29263	SLC6A7	Solute carrier family 6 (neurotransmitter transporter), member 7	#N/A	#N/A	#N/A
Lateolabrax_maculatus_GLEAN_10007003	black	8.29089	P2RY8	Purinergic receptor P2Y, G-protein coupled, 8	#N/A	#N/A	#N/A
Lateolabrax_maculatus_GLEAN_10014286	black	8.29031	BRD3	Bromodomain containing 3a	#N/A	#N/A	#N/A
Lateolabrax_maculatus_GLEAN_10017472	black	8.27751	SIKE1	Suppressor of IKBKE 1	#N/A	#N/A	#N/A
Lateolabrax_maculatus_GLEAN_10021028	black	8.24502	-	Reverse transcriptase (RNA-dependent DNA polymerase)	#N/A	#N/A	#N/A
Lateolabrax_maculatus_GLEAN_10012874	black	8.23967	SELENOF	Selenoprotein 15	#N/A	#N/A	#N/A
Lateolabrax_maculatus_GLEAN_10007531	black	8.21364	RBM12B	RNA binding motif protein 12B	#N/A	#N/A	#N/A
Lateolabrax_maculatus_GLEAN_10016712	black	8.21133	TRDMT1	Belongs to the class I-like SAM-binding methyltransferase superfamily. C5-methyltransferase family	#N/A	#N/A	#N/A
Lateolabrax_maculatus_GLEAN_10018041	black	8.20088	MMGT1	Membrane magnesium transporter 1	#N/A	#N/A	#N/A
Lateolabrax_maculatus_GLEAN_10022597	black	8.1819	CLUAP1	Clusterin associated protein 1	#N/A	#N/A	#N/A
Lateolabrax_maculatus_GLEAN_10009092	black	8.15089	CACNB4	Calcium channel, voltage-dependent, beta 4a subunit	#N/A	#N/A	#N/A
Lateolabrax_maculatus_GLEAN_10019242	black	8.14918	CXorf38	Chromosome X open reading frame 38	#N/A	#N/A	#N/A
Lateolabrax_maculatus_GLEAN_10017634	black	8.13877	ERICH1	Glutamate-rich protein 1	#N/A	#N/A	#N/A
Lateolabrax_maculatus_GLEAN_10006619	black	8.13148	RCOR2	REST corepressor 2	#N/A	#N/A	#N/A
Lateolabrax_maculatus_GLEAN_10021565	black	8.11542	TRAC	Immunoglobulin V-Type	#N/A	#N/A	#N/A
Lateolabrax_maculatus_GLEAN_10018794	black	8.10402	LYSMD4	peptidoglycan-binding, domain containing 4	#N/A	#N/A	#N/A
Lateolabrax_maculatus_GLEAN_10021103	black	8.10233	-	Reverse transcriptase (RNA-dependent DNA polymerase)	#N/A	#N/A	#N/A
Lateolabrax_maculatus_GLEAN_10018544	black	8.07163	PDCD4	Programmed cell death	#N/A	#N/A	#N/A
Lateolabrax_maculatus_GLEAN_10011548	black	8.0601	TTC33	tetratricopeptide repeat	#N/A	#N/A	#N/A
Lateolabrax_maculatus_GLEAN_10019795	black	8.05431	#N/A	#N/A	#N/A	#N/A	#N/A
Lateolabrax_maculatus_GLEAN_10007102	black	8.0533	ETFDH	Electron transfer flavoprotein-ubiquinone oxidoreductase	#N/A	#N/A	#N/A
Lateolabrax_maculatus_GLEAN_10000957	black	8.04384	-	-	#N/A	#N/A	#N/A
Lateolabrax_maculatus_GLEAN_10015204	black	8.0402	-	-	#N/A	#N/A	#N/A
Lateolabrax_maculatus_GLEAN_10010799	black	8.03395	CBLN4	Formin Homology 2 Domain	#N/A	#N/A	#N/A
Lateolabrax_maculatus_GLEAN_10008922	black	8.03123	TXNRD1	Thioredoxin reductase 1	#N/A	#N/A	#N/A
Lateolabrax_maculatus_GLEAN_10003601	black	8.02168	ago	F-box and WD repeat domain containing 7, E3 ubiquitin protein ligase	#N/A	#N/A	#N/A
Lateolabrax_maculatus_GLEAN_10012441	black	8.01869	AMIGO3	Adhesion molecule with Ig-like domain 3	#N/A	#N/A	#N/A
Lateolabrax_maculatus_GLEAN_10009913	black	7.99811	YTHDF3	YTH domain family	#N/A	#N/A	#N/A
Lateolabrax_maculatus_GLEAN_10011342	black	7.9962	DNA2	DNA replication helicase 2 homolog (yeast)	#N/A	#N/A	#N/A
Lateolabrax_maculatus_GLEAN_10011730	black	7.95508	-	One gap junction consists of a cluster of closely packed pairs of transmembrane channels, the connexons, through which materials of low MW diffuse from one cell to a neighboring cell	#N/A	#N/A	#N/A
Lateolabrax_maculatus_GLEAN_10002181	black	7.95367	UVSSA	UV-stimulated scaffold protein A	#N/A	#N/A	#N/A
Lateolabrax_maculatus_GLEAN_10018355	black	7.92012	CYP8B1	Cytochrome P450, family 8, subfamily B, polypeptide	#N/A	#N/A	#N/A
Lateolabrax_maculatus_GLEAN_10000213	black	7.88382	UBIAD1	UbiA prenyltransferase	#N/A	#N/A	#N/A
Lateolabrax_maculatus_GLEAN_10019416	black	7.88273	VCPKMT	Valosin containing protein lysine (K) methyltransferase	#N/A	#N/A	#N/A
Lateolabrax_maculatus_GLEAN_10017747	black	7.86274	-	Transcription elongation factor B	#N/A	#N/A	#N/A
Lateolabrax_maculatus_GLEAN_10013920	black	7.84309	C6orf136	Chromosome 6 open reading frame 136	#N/A	#N/A	#N/A
Lateolabrax_maculatus_GLEAN_10014365	black	7.84174	NOX5	NADPH oxidase, EF-hand calcium binding domain 5	#N/A	#N/A	#N/A
Lateolabrax_maculatus_GLEAN_10021205	black	7.82286	-	PRY	#N/A	#N/A	#N/A
Lateolabrax_maculatus_GLEAN_10009166	black	7.81918	-	Poly ADP-ribose polymerase 11-like	#N/A	#N/A	#N/A
Lateolabrax_maculatus_GLEAN_10000651	black	7.81623	-	Scavenger receptor cysteine-rich type 1 protein M130-like	#N/A	#N/A	#N/A
Lateolabrax_maculatus_GLEAN_10012860	black	7.81106	GNG12	Guanine nucleotide-binding proteins (G proteins) are involved as a modulator or transducer in various transmembrane signaling systems. The beta and gamma chains are required for the GTPase activity, for replacement of GDP by GTP, and for G protein- effector interaction	#N/A	#N/A	#N/A
Lateolabrax_maculatus_GLEAN_10000200	black	7.80124	EXD1	Exonuclease 3'-5'	#N/A	#N/A	#N/A
Lateolabrax_maculatus_GLEAN_10007693	black	7.78631	RRAGC	Ras-related GTP binding	#N/A	#N/A	#N/A
Lateolabrax_maculatus_GLEAN_10019685	black	7.78353	PHF1	PHD finger protein 1	#N/A	#N/A	#N/A
Lateolabrax_maculatus_GLEAN_10019055	black	7.78175	BCR	breakpoint cluster region	#N/A	#N/A	#N/A
Lateolabrax_maculatus_GLEAN_10010221	black	7.78058	-	Epithelial membrane protein	#N/A	#N/A	#N/A
Lateolabrax_maculatus_GLEAN_10015909	black	7.76146	RACGAP1	Rac GTPase-activating protein 1	#N/A	#N/A	#N/A
Lateolabrax_maculatus_GLEAN_10018038	black	7.71294	FAM122B	Family with sequence similarity 122B	#N/A	#N/A	#N/A
Lateolabrax_maculatus_GLEAN_10018819	black	7.70934	PPP6R2	phosphatase 6, regulatory subunit	#N/A	#N/A	#N/A
Lateolabrax_maculatus_GLEAN_10007190	black	7.70693	ZNF384	Zinc finger protein	#N/A	#N/A	#N/A
Lateolabrax_maculatus_GLEAN_10021551	black	7.70666	-	carbohydrate binding	#N/A	#N/A	#N/A
Lateolabrax_maculatus_GLEAN_10011598	black	7.70346	PCSK5	Proprotein convertase subtilisin kexin type	#N/A	#N/A	#N/A
Lateolabrax_maculatus_GLEAN_10005776	black	7.69856	GPRIN3	G protein-regulated inducer of neurite outgrowth	#N/A	#N/A	#N/A
Lateolabrax_maculatus_GLEAN_10016376	black	7.68967	FAAP20	Ubiquitin-binding zinc-finger	#N/A	#N/A	#N/A
Lateolabrax_maculatus_GLEAN_10019404	black	7.65997	-	-	#N/A	#N/A	#N/A
Lateolabrax_maculatus_GLEAN_10017608	black	7.65633	PAK6	Serine threonine-protein kinase PAK	#N/A	#N/A	#N/A
Lateolabrax_maculatus_GLEAN_10019405	black	7.64541	-	RNA-directed DNA polymerase activity	#N/A	#N/A	#N/A
Lateolabrax_maculatus_GLEAN_10002374	black	7.64375	SLC22A18	Solute carrier family 22	#N/A	#N/A	#N/A
Lateolabrax_maculatus_GLEAN_10005799	black	7.64078	KCNG3	Potassium voltage-gated channel, subfamily G, member	#N/A	#N/A	#N/A
Lateolabrax_maculatus_GLEAN_10019894	black	7.64038	pogk	Pogo transposable element with KRAB domain	#N/A	#N/A	#N/A
Lateolabrax_maculatus_GLEAN_10003847	black	7.62988	-	C-type lectin domain family 4 member	#N/A	#N/A	#N/A
Lateolabrax_maculatus_GLEAN_10006917	black	7.61637	CORO1C	Belongs to the WD repeat coronin family	#N/A	#N/A	#N/A
Lateolabrax_maculatus_GLEAN_10014498	black	7.60409	-	Glucosidase 2 subunit beta-like	#N/A	#N/A	#N/A
Lateolabrax_maculatus_GLEAN_10004965	black	7.59487	DCSTAMP	Dendrocyte expressed seven transmembrane protein	#N/A	#N/A	#N/A
Lateolabrax_maculatus_GLEAN_10017882	black	7.59051	CNTN4	Contactin 4	#N/A	#N/A	#N/A
Lateolabrax_maculatus_GLEAN_10017084	black	7.56084	YTHDF2	YTH domain family	#N/A	#N/A	#N/A
Lateolabrax_maculatus_GLEAN_10022965	black	7.5523	SERP2	Stress-associated endoplasmic reticulum protein	#N/A	#N/A	#N/A
Lateolabrax_maculatus_GLEAN_10015214	black	7.53037	-	-	#N/A	#N/A	#N/A
Lateolabrax_maculatus_GLEAN_10000752	black	7.51754	PNP	The purine nucleoside phosphorylases catalyze the phosphorolytic breakdown of the N-glycosidic bond in the beta- (deoxy)ribonucleoside molecules, with the formation of the corresponding free purine bases and pentose-1-phosphate	#N/A	#N/A	#N/A
Lateolabrax_maculatus_GLEAN_10008200	black	7.49163	TSPAN33	Tetraspanin 33	#N/A	#N/A	#N/A
Lateolabrax_maculatus_GLEAN_10013819	black	7.45823	lbx2	Ladybird homeobox	#N/A	#N/A	#N/A
Lateolabrax_maculatus_GLEAN_10003753	black	7.44568	CRYBA1	Belongs to the beta gamma-crystallin family	#N/A	#N/A	#N/A
Lateolabrax_maculatus_GLEAN_10001761	black	7.44084	C11orf54	Chromosome 11 open reading frame 54	#N/A	#N/A	#N/A
Lateolabrax_maculatus_GLEAN_10001228	black	7.43672	MKS1	Meckel syndrome type 1	#N/A	#N/A	#N/A
Lateolabrax_maculatus_GLEAN_10000332	black	7.42855	SPEF2	Sperm flagellar	#N/A	#N/A	#N/A
Lateolabrax_maculatus_GLEAN_10017900	black	7.42238	TXNRD3	Thioredoxin reductase 1	#N/A	#N/A	#N/A
Lateolabrax_maculatus_GLEAN_10014025	black	7.41965	PYCRL	Belongs to the pyrroline-5-carboxylate reductase family	#N/A	#N/A	#N/A
Lateolabrax_maculatus_GLEAN_10016014	black	7.3733	COL10A1	Collagen type X alpha 1	#N/A	#N/A	#N/A
Lateolabrax_maculatus_GLEAN_10004754	black	7.3432	MAP4K1	Mitogen-activated protein kinase kinase kinase kinase	#N/A	#N/A	#N/A
Lateolabrax_maculatus_GLEAN_10023320	black	7.33618	#N/A	#N/A	#N/A	#N/A	#N/A
Lateolabrax_maculatus_GLEAN_10000559	black	7.33363	-	Zinc finger protein	#N/A	#N/A	#N/A
Lateolabrax_maculatus_GLEAN_10015705	black	7.32784	C19orf10	Chromosome 19 open reading frame 10	#N/A	#N/A	#N/A
Lateolabrax_maculatus_GLEAN_10017798	black	7.28723	MCU	Calcium uniporter	#N/A	#N/A	#N/A
Lateolabrax_maculatus_GLEAN_10005394	black	7.2632	C12orf40	Chromosome 12 open reading frame 40	#N/A	#N/A	#N/A
Lateolabrax_maculatus_GLEAN_10016423	black	7.25335	-	Astacin-like metallo-endopeptidase (M12 family)	#N/A	#N/A	#N/A
Lateolabrax_maculatus_GLEAN_10020493	black	7.23805	DSG2	homophilic cell adhesion via plasma membrane adhesion molecules	#N/A	#N/A	#N/A
Lateolabrax_maculatus_GLEAN_10020065	black	7.23621	#N/A	#N/A	#N/A	#N/A	#N/A
Lateolabrax_maculatus_GLEAN_10011470	black	7.21805	-	-	#N/A	#N/A	#N/A
Lateolabrax_maculatus_GLEAN_10014436	black	7.17962	-	B-cell receptor CD22-like	#N/A	#N/A	#N/A
Lateolabrax_maculatus_GLEAN_10017459	black	7.16924	MTOR	Mechanistic target of rapamycin (serine threonine kinase)	#N/A	#N/A	#N/A
Lateolabrax_maculatus_GLEAN_10017626	black	7.16521	#N/A	#N/A	#N/A	#N/A	#N/A
Lateolabrax_maculatus_GLEAN_10008405	black	7.15457	SYT7	Synaptotagmin VII	#N/A	#N/A	#N/A
Lateolabrax_maculatus_GLEAN_10013082	black	7.14951	RUNX1	Runt-related transcription factor	#N/A	#N/A	#N/A
Lateolabrax_maculatus_GLEAN_10022575	black	7.1031	AFMID	Catalyzes the hydrolysis of N-formyl-L-kynurenine to L- kynurenine, the second step in the kynurenine pathway of tryptophan degradation. Kynurenine may be further oxidized to nicotinic acid, NAD(H) and NADP(H). Required for elimination of toxic metabolites	#N/A	#N/A	#N/A
Lateolabrax_maculatus_GLEAN_10014545	black	7.05614	TMEM255A	Transmembrane protein 255A	#N/A	#N/A	#N/A
Lateolabrax_maculatus_GLEAN_10018105	black	7.04329	gabrp	Belongs to the ligand-gated ion channel (TC 1.A.9) family	#N/A	#N/A	#N/A
Lateolabrax_maculatus_GLEAN_10012916	black	7.03132	phr	Zgc 66475	#N/A	#N/A	#N/A
Lateolabrax_maculatus_GLEAN_10015342	black	7.02756	CISD2	CDGSH iron sulfur domain 2	#N/A	#N/A	#N/A
Lateolabrax_maculatus_GLEAN_10021446	black	7.02205	-	Ribonuclease H protein	#N/A	#N/A	#N/A
Lateolabrax_maculatus_GLEAN_10021282	black	7.01533	urgcp	Up-regulator of cell	#N/A	#N/A	#N/A
Lateolabrax_maculatus_GLEAN_10008417	black	6.98364	GTF2H1	General transcription factor	#N/A	#N/A	#N/A
Lateolabrax_maculatus_GLEAN_10014075	black	6.98354	HHEX	homeobox	#N/A	#N/A	#N/A
Lateolabrax_maculatus_GLEAN_10016397	black	6.9458	-	Lecithin retinol acyltransferase	#N/A	#N/A	#N/A
Lateolabrax_maculatus_GLEAN_10018097	black	6.90163	MED7	Component of the Mediator complex, a coactivator involved in the regulated transcription of nearly all RNA polymerase II-dependent genes. Mediator functions as a bridge to convey information from gene-specific regulatory proteins to the basal RNA polymerase II transcription machinery	#N/A	#N/A	#N/A
Lateolabrax_maculatus_GLEAN_10019211	black	6.8988	C9orf41	Chromosome 9 open reading frame 41	#N/A	#N/A	#N/A
Lateolabrax_maculatus_GLEAN_10021972	black	6.88345	#N/A	#N/A	#N/A	#N/A	#N/A
Lateolabrax_maculatus_GLEAN_10018118	black	6.87989	#N/A	#N/A	#N/A	#N/A	#N/A
Lateolabrax_maculatus_GLEAN_10017869	black	6.87398	SHQ1	SHQ1 homolog	#N/A	#N/A	#N/A
Lateolabrax_maculatus_GLEAN_10019825	black	6.8628	#N/A	#N/A	#N/A	#N/A	#N/A
Lateolabrax_maculatus_GLEAN_10023146	black	6.83987	slc24a1	Sodium potassium calcium exchanger	#N/A	#N/A	#N/A
Lateolabrax_maculatus_GLEAN_10002942	black	6.83679	ADCK2	aarF domain containing kinase 2	#N/A	#N/A	#N/A
Lateolabrax_maculatus_GLEAN_10017596	black	6.83361	DNAJC17	homolog subfamily C member	#N/A	#N/A	#N/A
Lateolabrax_maculatus_GLEAN_10014352	black	6.82747	LYRM5	Belongs to the complex I LYR family	#N/A	#N/A	#N/A
Lateolabrax_maculatus_GLEAN_10001267	black	6.81545	TMEM26	Transmembrane protein 26	#N/A	#N/A	#N/A
Lateolabrax_maculatus_GLEAN_10011587	black	6.81336	PDCL	Phosducin-like	#N/A	#N/A	#N/A
Lateolabrax_maculatus_GLEAN_10002559	black	6.80449	-	Zic family member 6	#N/A	#N/A	#N/A
Lateolabrax_maculatus_GLEAN_10012673	black	6.7863	KCNV2	channel, subfamily V, member	#N/A	#N/A	#N/A
Lateolabrax_maculatus_GLEAN_10004067	black	6.77529	IL12RB2	Interleukin 12 receptor, beta	#N/A	#N/A	#N/A
Lateolabrax_maculatus_GLEAN_10015022	black	6.75821	TRIM7	E3 ubiquitin-protein ligase	#N/A	#N/A	#N/A
Lateolabrax_maculatus_GLEAN_10000080	black	6.7363	XPNPEP1	X-prolyl aminopeptidase (aminopeptidase P) 1, soluble	#N/A	#N/A	#N/A
Lateolabrax_maculatus_GLEAN_10015051	black	6.71581	-	Domain first found in the mice T locus (Brachyury) protein	#N/A	#N/A	#N/A
Lateolabrax_maculatus_GLEAN_10003596	black	6.67412	RNF150	Ring finger protein	#N/A	#N/A	#N/A
Lateolabrax_maculatus_GLEAN_10017333	black	6.64841	TNFRSF25	Tumor necrosis factor receptor superfamily member	#N/A	#N/A	#N/A
Lateolabrax_maculatus_GLEAN_10014552	black	6.60983	UBE2A	Ubiquitin-conjugating enzyme E2 A	#N/A	#N/A	#N/A
Lateolabrax_maculatus_GLEAN_10000621	black	6.57265	MVP	Major vault protein	#N/A	#N/A	#N/A
Lateolabrax_maculatus_GLEAN_10020232	black	6.55405	PPP1R12B	Protein phosphatase 1, regulatory subunit	#N/A	#N/A	#N/A
Lateolabrax_maculatus_GLEAN_10006550	black	6.55014	-	Cholesterol 25-hydroxylase like 1, tandem duplicate 2	#N/A	#N/A	#N/A
Lateolabrax_maculatus_GLEAN_10008301	black	6.53135	RAB18	RAB18B, member RAS oncogene family	#N/A	#N/A	#N/A
Lateolabrax_maculatus_GLEAN_10001469	black	6.52206	HCN3	voltage-gated potassium channel activity involved in SA node cell action potential depolarization	#N/A	#N/A	#N/A
Lateolabrax_maculatus_GLEAN_10009806	black	6.50432	-	Nucleobindin	#N/A	#N/A	#N/A
Lateolabrax_maculatus_GLEAN_10004552	black	6.49768	-	Immunoglobulin C-Type	#N/A	#N/A	#N/A
Lateolabrax_maculatus_GLEAN_10001910	black	6.49739	-	Immunoglobulin	#N/A	#N/A	#N/A
Lateolabrax_maculatus_GLEAN_10016559	black	6.47509	C1QL4	Complement component 1, q subcomponent-like 4	#N/A	#N/A	#N/A
Lateolabrax_maculatus_GLEAN_10023065	black	6.45541	SNCA	Synuclein, alpha (non A4 component of amyloid precursor)	#N/A	#N/A	#N/A
Lateolabrax_maculatus_GLEAN_10010351	black	6.42818	SUN1	Sad1 and UNC84 domain containing 1	#N/A	#N/A	#N/A
Lateolabrax_maculatus_GLEAN_10019453	black	6.40843	-	Immunoglobulin C-Type	#N/A	#N/A	#N/A
Lateolabrax_maculatus_GLEAN_10003429	black	6.40016	-	Complement C1q-like protein	#N/A	#N/A	#N/A
Lateolabrax_maculatus_GLEAN_10016607	black	6.39913	THADA	Thyroid adenoma associated	#N/A	#N/A	#N/A
Lateolabrax_maculatus_GLEAN_10017871	black	6.39674	PPP4R2	phosphatase 4, regulatory subunit	#N/A	#N/A	#N/A
Lateolabrax_maculatus_GLEAN_10017006	black	6.37058	-	Glycosyltransferase family 92	#N/A	#N/A	#N/A
Lateolabrax_maculatus_GLEAN_10014221	black	6.36773	XKR9	XK, Kell blood group complex subunit-related family, member 9	#N/A	#N/A	#N/A
Lateolabrax_maculatus_GLEAN_10023038	black	6.36279	-	Zona pellucida sperm-binding protein 4-like	#N/A	#N/A	#N/A
Lateolabrax_maculatus_GLEAN_10008015	black	6.35082	POLR2C	Polymerase (RNA) II (DNA directed) polypeptide C	#N/A	#N/A	#N/A
Lateolabrax_maculatus_GLEAN_10008113	black	6.33805	IL4I1	Interleukin 4 induced 1	#N/A	#N/A	#N/A
Lateolabrax_maculatus_GLEAN_10011853	black	6.33382	YIPF1	Yip1 domain family member 1	#N/A	#N/A	#N/A
Lateolabrax_maculatus_GLEAN_10017888	black	6.31113	RPN2	Ribophorin II	#N/A	#N/A	#N/A
Lateolabrax_maculatus_GLEAN_10015527	black	6.29228	YAP1	Yes-associated protein 1	#N/A	#N/A	#N/A
Lateolabrax_maculatus_GLEAN_10003075	black	6.26879	COL28A1	Collagen, type XXVIII, alpha 1	#N/A	#N/A	#N/A
Lateolabrax_maculatus_GLEAN_10020081	black	6.26862	TRIM35	Tripartite	#N/A	#N/A	#N/A
Lateolabrax_maculatus_GLEAN_10019086	black	6.25395	AP3M2	Adaptor-related protein complex 3, mu 2 subunit	#N/A	#N/A	#N/A
Lateolabrax_maculatus_GLEAN_10010692	black	6.25353	FGF22	Fibroblast growth factor 22	#N/A	#N/A	#N/A
Lateolabrax_maculatus_GLEAN_10002038	black	6.24559	STK19	Serine threonine kinase 19	#N/A	#N/A	#N/A
Lateolabrax_maculatus_GLEAN_10017093	black	6.24306	NIPAL3	NIPA-like domain containing 3	#N/A	#N/A	#N/A
Lateolabrax_maculatus_GLEAN_10022531	black	6.24194	CAPN2	Calpain 2, (m II) large subunit	#N/A	#N/A	#N/A
Lateolabrax_maculatus_GLEAN_10012095	black	6.22761	RAB11FIP1	RAB11 family interacting protein 1 (class I)	#N/A	#N/A	#N/A
Lateolabrax_maculatus_GLEAN_10005171	black	6.22352	SUGP1	SURP and G patch domain containing 1	#N/A	#N/A	#N/A
Lateolabrax_maculatus_GLEAN_10016920	black	6.19876	MEOX2	Mesenchyme homeobox 2	#N/A	#N/A	#N/A
Lateolabrax_maculatus_GLEAN_10020463	black	6.18688	-	granzyme	#N/A	#N/A	#N/A
Lateolabrax_maculatus_GLEAN_10006386	black	6.1859	TMEM243	Transmembrane protein 243	#N/A	#N/A	#N/A
Lateolabrax_maculatus_GLEAN_10007635	black	6.18137	-	Cryptochrome 5	#N/A	#N/A	#N/A
Lateolabrax_maculatus_GLEAN_10011183	black	6.18016	TLK2	Serine threonine-protein kinase tousled-like	#N/A	#N/A	#N/A
Lateolabrax_maculatus_GLEAN_10001506	black	6.17084	-	Dapper	#N/A	0.04	#N/A
Lateolabrax_maculatus_GLEAN_10010823	black	6.13743	P2RY11	P2Y purinoceptor 1-like	#N/A	#N/A	#N/A
Lateolabrax_maculatus_GLEAN_10008016	black	6.13068	-	Diacylglycerol O-acyltransferase 1-like	#N/A	#N/A	#N/A
Lateolabrax_maculatus_GLEAN_10002904	black	6.128	TMCC1	Transmembrane and coiled-coil	#N/A	#N/A	#N/A
Lateolabrax_maculatus_GLEAN_10003911	black	6.12657	HPS1	Hermansky-Pudlak syndrome 1	#N/A	#N/A	#N/A
Lateolabrax_maculatus_GLEAN_10008153	black	6.1256	cyp17a2	Cytochrome P450, family 17, subfamily A, polypeptide 2	0.04	#N/A	#N/A
Lateolabrax_maculatus_GLEAN_10009356	black	6.10782	IL1RAPL1	receptor accessory protein-like	#N/A	#N/A	#N/A
Lateolabrax_maculatus_GLEAN_10014899	black	6.08605	TRMU	tRNA 5-methylaminomethyl-2-thiouridylate methyltransferase	#N/A	#N/A	#N/A
Lateolabrax_maculatus_GLEAN_10013493	black	6.08162	NOXO1	NADPH oxidase organizer	#N/A	#N/A	#N/A
Lateolabrax_maculatus_GLEAN_10021104	black	6.06691	-	Reverse transcriptase (RNA-dependent DNA polymerase)	#N/A	#N/A	#N/A
Lateolabrax_maculatus_GLEAN_10015029	black	6.06058	CPM	Carboxypeptidase M	#N/A	#N/A	#N/A
Lateolabrax_maculatus_GLEAN_10021532	black	6.05877	CXXC1	finger protein 1	#N/A	#N/A	#N/A
Lateolabrax_maculatus_GLEAN_10022143	black	6.05428	-	K02A2.6-like	#N/A	#N/A	#N/A
Lateolabrax_maculatus_GLEAN_10008642	black	6.04029	-	Zgc 66455	#N/A	#N/A	#N/A
Lateolabrax_maculatus_GLEAN_10018145	black	6.00212	PROB1	Proline-rich basic protein 1	#N/A	#N/A	#N/A
Lateolabrax_maculatus_GLEAN_10018016	black	5.99493	GUF1	Promotes mitochondrial protein synthesis. May act as a fidelity factor of the translation reaction, by catalyzing a one- codon backward translocation of tRNAs on improperly translocated ribosomes. Binds to mitochondrial ribosomes in a GTP-dependent manner	#N/A	#N/A	#N/A
Lateolabrax_maculatus_GLEAN_10010681	black	5.96283	-	granzyme	#N/A	0.04	#N/A
Lateolabrax_maculatus_GLEAN_10012960	black	5.96131	-	B-cell receptor CD22-like isoform X1	#N/A	#N/A	#N/A
Lateolabrax_maculatus_GLEAN_10010822	black	5.95307	-	UDP glucuronosyltransferase 5 family, polypeptide E1	#N/A	#N/A	#N/A
Lateolabrax_maculatus_GLEAN_10000734	black	5.93798	-	Regulates the GDP GTP exchange reaction of most RAB proteins by inhibiting the dissociation of GDP from them, and the subsequent binding of GTP	#N/A	#N/A	#N/A
Lateolabrax_maculatus_GLEAN_10021031	black	5.92878	#N/A	#N/A	#N/A	#N/A	#N/A
Lateolabrax_maculatus_GLEAN_10021080	black	5.92456	#N/A	#N/A	#N/A	#N/A	#N/A
Lateolabrax_maculatus_GLEAN_10013419	black	5.92199	-	Aurora kinase A and ninein interacting protein	#N/A	#N/A	#N/A
Lateolabrax_maculatus_GLEAN_10008322	black	5.88746	NDOR1	Component of the cytosolic iron-sulfur (Fe-S) protein assembly (CIA) machinery. Required for the maturation of extramitochondrial Fe-S proteins. Part of an electron transfer chain functioning in an early step of cytosolic Fe-S biogenesis. Transfers electrons from NADPH to the Fe S cluster of CIAPIN1	#N/A	#N/A	#N/A
Lateolabrax_maculatus_GLEAN_10003355	black	5.88117	TMEM38B	Transmembrane protein 38B	#N/A	#N/A	#N/A
Lateolabrax_maculatus_GLEAN_10007046	black	5.8789	PPFIA3	Protein tyrosine phosphatase, receptor type, f polypeptide (PTPRF), interacting protein (liprin), alpha 3	#N/A	#N/A	#N/A
Lateolabrax_maculatus_GLEAN_10003468	black	5.86077	GPR180	G protein-coupled receptor 180	#N/A	#N/A	#N/A
Lateolabrax_maculatus_GLEAN_10013479	black	5.85162	-	Hemoglobin	#N/A	#N/A	#N/A
Lateolabrax_maculatus_GLEAN_10022460	black	5.84756	PPP3R1	Protein phosphatase 3 (formerly 2B), regulatory s1ubunit B, alpha isoform, b	#N/A	#N/A	#N/A
Lateolabrax_maculatus_GLEAN_10009200	black	5.83302	POGZ	pogo transposable element with ZNF domain	#N/A	#N/A	#N/A
Lateolabrax_maculatus_GLEAN_10002758	black	5.8197	MRPL16	ribosomal protein L16	#N/A	#N/A	#N/A
Lateolabrax_maculatus_GLEAN_10015580	black	5.81559	-	PMP-22/EMP/MP20/Claudin family	#N/A	#N/A	#N/A
Lateolabrax_maculatus_GLEAN_10016806	black	5.80842	YWHAB	Tyrosine 3-monooxygenase tryptophan 5-monooxygenase activation protein, beta	#N/A	#N/A	#N/A
Lateolabrax_maculatus_GLEAN_10017818	black	5.79271	MGME1	Metal-dependent single-stranded DNA (ssDNA) exonuclease involved in mitochondrial genome maintenance. Has preference for 5'-3' exonuclease activity. Necessary for maintenance of proper 7S DNA levels. Probably involved in mitochondrial DNA (mtDNA) repair	#N/A	#N/A	#N/A
Lateolabrax_maculatus_GLEAN_10009148	black	5.79038	PRRT4	Proline-rich transmembrane protein	#N/A	#N/A	#N/A
Lateolabrax_maculatus_GLEAN_10001568	black	5.77396	RRBP1	Ribosome binding protein 1 homolog	#N/A	#N/A	#N/A
Lateolabrax_maculatus_GLEAN_10009432	black	5.75826	MARK4	MAP microtubule affinity-regulating kinase	#N/A	#N/A	#N/A
Lateolabrax_maculatus_GLEAN_10000644	black	5.73616	RNF151	Ring finger protein	#N/A	#N/A	#N/A
Lateolabrax_maculatus_GLEAN_10003802	black	5.71831	-	Stomatin (EPB72)-like 3a	#N/A	#N/A	#N/A
Lateolabrax_maculatus_GLEAN_10000995	black	5.70731	TWISTNB	DNA-directed RNA polymerase I subunit	#N/A	#N/A	#N/A
Lateolabrax_maculatus_GLEAN_10021603	black	5.7056	-	Alcohol dehydrogenase transcription factor Myb/SANT-like	#N/A	0.04	#N/A
Lateolabrax_maculatus_GLEAN_10006747	black	5.69621	PAX6	Paired box	#N/A	#N/A	#N/A
Lateolabrax_maculatus_GLEAN_10009031	black	5.68135	-	Zgc 162144	#N/A	#N/A	#N/A
Lateolabrax_maculatus_GLEAN_10014626	black	5.66541	shc4	SHC (Src homology 2 domain containing) family, member 4	#N/A	#N/A	#N/A
Lateolabrax_maculatus_GLEAN_10020092	black	5.65971	SNF8	Component of the endosomal sorting complex required for transport II (ESCRT-II), which is required for multivesicular body (MVB) formation and sorting of endosomal cargo proteins into MVBs	#N/A	#N/A	#N/A
Lateolabrax_maculatus_GLEAN_10001535	black	5.64421	-	Immunoglobulin V-set domain	#N/A	#N/A	#N/A
Lateolabrax_maculatus_GLEAN_10000318	black	5.62929	CACTIN	Conserved mid region of cactin	#N/A	#N/A	#N/A
Lateolabrax_maculatus_GLEAN_10008639	black	5.628	UGP2	UDP-glucose pyrophosphorylase 2a	#N/A	#N/A	#N/A
Lateolabrax_maculatus_GLEAN_10013959	black	5.62417	GPANK1	G patch domain and ankyrin	#N/A	#N/A	#N/A
Lateolabrax_maculatus_GLEAN_10007010	black	5.60647	-	Si ch211-218d20.15	#N/A	#N/A	#N/A
Lateolabrax_maculatus_GLEAN_10005972	black	5.60222	hspb6	Heat shock protein	#N/A	#N/A	#N/A
Lateolabrax_maculatus_GLEAN_10016601	black	5.57788	-	Transmembrane protein 229B-like	#N/A	#N/A	#N/A
Lateolabrax_maculatus_GLEAN_10015695	black	5.55551	QSOX1	sulfhydryl oxidase 1	#N/A	#N/A	#N/A
Lateolabrax_maculatus_GLEAN_10017745	black	5.54968	FBXO9	F-box protein 9	#N/A	#N/A	#N/A
Lateolabrax_maculatus_GLEAN_10022606	black	5.54572	RDH10	Retinol dehydrogenase	#N/A	#N/A	#N/A
Lateolabrax_maculatus_GLEAN_10015999	black	5.53993	CCL21	regulation of myeloid dendritic cell chemotaxis	#N/A	#N/A	#N/A
Lateolabrax_maculatus_GLEAN_10021923	black	5.53991	-	K02A2.6-like	#N/A	#N/A	#N/A
Lateolabrax_maculatus_GLEAN_10009383	black	5.52795	PRG4	proteoglycan	#N/A	#N/A	#N/A
Lateolabrax_maculatus_GLEAN_10000188	black	5.52491	ANKS1A	Ankyrin repeat and sterile alpha motif domain containing	#N/A	#N/A	#N/A
Lateolabrax_maculatus_GLEAN_10004852	black	5.52445	-	S-100/ICaBP type calcium binding domain	#N/A	#N/A	#N/A
Lateolabrax_maculatus_GLEAN_10015248	black	5.52279	dmrt2b	Doublesex and mab-3 related transcription factor 2b	#N/A	#N/A	#N/A
Lateolabrax_maculatus_GLEAN_10006087	black	5.50866	CHAT	Belongs to the carnitine choline acetyltransferase family	#N/A	#N/A	0.04
Lateolabrax_maculatus_GLEAN_10000281	black	5.50297	TIMELESS	timeless homolog	#N/A	#N/A	#N/A
Lateolabrax_maculatus_GLEAN_10005000	black	5.48073	WDR5	WD repeat domain 5	#N/A	#N/A	#N/A
Lateolabrax_maculatus_GLEAN_10012704	black	5.44658	LRRC16A	Leucine rich repeat containing 16A	#N/A	#N/A	#N/A
Lateolabrax_maculatus_GLEAN_10008142	black	5.44522	GIMD1	GTPase IMAP family member	#N/A	#N/A	#N/A
Lateolabrax_maculatus_GLEAN_10007254	black	5.42576	FAM98A	Family with sequence similarity 98, member A	#N/A	#N/A	#N/A
Lateolabrax_maculatus_GLEAN_10005118	black	5.3961	-	Tropomyosin	#N/A	#N/A	#N/A
Lateolabrax_maculatus_GLEAN_10009604	black	5.39383	ATRNL1	Attractin-like	#N/A	#N/A	#N/A
Lateolabrax_maculatus_GLEAN_10016707	black	5.39006	PDE1C	Phosphodiesterase 1C, calmodulin-dependent 70kDa	#N/A	#N/A	#N/A
Lateolabrax_maculatus_GLEAN_10005232	black	5.38816	PDE4A	Phosphodiesterase 4A, cAMP-specific	#N/A	#N/A	#N/A
Lateolabrax_maculatus_GLEAN_10008710	black	5.35841	RALGDS	Ral guanine nucleotide dissociation	#N/A	#N/A	#N/A
Lateolabrax_maculatus_GLEAN_10011791	black	5.33013	-	Cholinergic receptor, nicotinic, beta 2a	#N/A	#N/A	0.04
Lateolabrax_maculatus_GLEAN_10015030	black	5.31446	NUP107	Nucleoporin 107	#N/A	#N/A	#N/A
Lateolabrax_maculatus_GLEAN_10005669	black	5.30622	TOM1	Target of	#N/A	#N/A	#N/A
Lateolabrax_maculatus_GLEAN_10008534	black	5.28149	CHRDL2	Chordin-like	#N/A	#N/A	#N/A
Lateolabrax_maculatus_GLEAN_10006119	black	5.27253	ACSS3	acyl-CoA synthetase short-chain family member 3	#N/A	#N/A	#N/A
Lateolabrax_maculatus_GLEAN_10003907	black	5.26446	#N/A	#N/A	#N/A	#N/A	#N/A
Lateolabrax_maculatus_GLEAN_10022038	black	5.25306	-	Fc receptor-like protein	#N/A	#N/A	#N/A
Lateolabrax_maculatus_GLEAN_10011400	black	5.24667	CCR6	c-C chemokine receptor type	#N/A	#N/A	#N/A
Lateolabrax_maculatus_GLEAN_10015443	black	5.24572	rhou	Belongs to the small GTPase superfamily. Rho family	#N/A	#N/A	0.04
Lateolabrax_maculatus_GLEAN_10005812	black	5.21524	ENTPD1	Ectonucleoside triphosphate diphosphohydrolase	#N/A	#N/A	#N/A
Lateolabrax_maculatus_GLEAN_10008831	black	5.20243	WASF1	protein family member 1	#N/A	#N/A	#N/A
Lateolabrax_maculatus_GLEAN_10021310	black	5.19043	-	transposition, RNA-mediated	#N/A	#N/A	#N/A
Lateolabrax_maculatus_GLEAN_10011764	black	5.1755	CASP7	Belongs to the peptidase C14A family	#N/A	#N/A	#N/A
Lateolabrax_maculatus_GLEAN_10018654	black	5.15828	PPARG	Nuclear receptor that binds peroxisome proliferators such as hypolipidemic drugs and fatty acids. Once activated by a ligand, the nuclear receptor binds to DNA specific PPAR response elements (PPRE) and modulates the transcription of its target genes, such as acyl-CoA oxidase. It therefore controls the peroxisomal beta-oxidation pathway of fatty acids. Key regulator of adipocyte differentiation a…	#N/A	#N/A	#N/A
Lateolabrax_maculatus_GLEAN_10000714	black	5.13823	ST8SIA6	ST8 alpha-N-acetyl-neuraminide alpha-2,8-sialyltransferase 6	#N/A	#N/A	#N/A
Lateolabrax_maculatus_GLEAN_10005810	black	5.13511	-	Thrombospondin C-terminal region	#N/A	#N/A	#N/A
Lateolabrax_maculatus_GLEAN_10008779	black	5.12852	MBTD1	Mbt domain containing 1	#N/A	#N/A	#N/A
Lateolabrax_maculatus_GLEAN_10002536	black	5.11669	TDRD6	Tudor domain-containing protein 6-like	#N/A	#N/A	#N/A
Lateolabrax_maculatus_GLEAN_10005383	black	5.11187	CASC1	Cancer susceptibility candidate 1	#N/A	#N/A	0.04
Lateolabrax_maculatus_GLEAN_10005561	black	5.08819	TECR	trans-2,3-enoyl-CoA reductase a	#N/A	#N/A	#N/A
Lateolabrax_maculatus_GLEAN_10012781	black	5.07977	-	Family with sequence similarity 171, member B	#N/A	#N/A	#N/A
Lateolabrax_maculatus_GLEAN_10008134	black	5.07873	-	Zinc finger protein	#N/A	#N/A	#N/A
Lateolabrax_maculatus_GLEAN_10013857	black	5.06323	PCTP	Phosphatidylcholine transfer	#N/A	#N/A	#N/A
Lateolabrax_maculatus_GLEAN_10000952	black	5.04521	-	SET (Su(var)3-9, Enhancer-of-zeste, Trithorax) domain	0.04	0.04	0.04
Lateolabrax_maculatus_GLEAN_10009550	black	5.02573	ANAPC16	complex subunit 16	#N/A	#N/A	#N/A
Lateolabrax_maculatus_GLEAN_10013410	black	4.96248	LRRC14B	Leucine rich repeat containing 14B	#N/A	#N/A	#N/A
Lateolabrax_maculatus_GLEAN_10017473	black	4.95065	HTR6	receptor 6	#N/A	#N/A	#N/A
Lateolabrax_maculatus_GLEAN_10009208	black	4.9351	bnipl	Bcl-2 adenovirus E1B	#N/A	#N/A	#N/A
Lateolabrax_maculatus_GLEAN_10004339	black	4.92675	-	Carcinoembryonic antigen-related cell adhesion molecule	#N/A	#N/A	#N/A
Lateolabrax_maculatus_GLEAN_10015523	black	4.91242	PLCH1	1-phosphatidylinositol 4,5-bisphosphate phosphodiesterase	#N/A	#N/A	#N/A
Lateolabrax_maculatus_GLEAN_10012479	black	4.89957	-	-	#N/A	#N/A	#N/A
Lateolabrax_maculatus_GLEAN_10009638	black	4.89941	PRPSAP1	Phosphoribosyl pyrophosphate synthetase-associated protein 1	#N/A	#N/A	#N/A
Lateolabrax_maculatus_GLEAN_10005231	black	4.87697	RAVER1	Ribonucleoprotein PTB-binding	#N/A	#N/A	#N/A
Lateolabrax_maculatus_GLEAN_10003423	black	4.83375	ITGB1BP2	Integrin beta 1 binding protein (melusin) 2	#N/A	#N/A	#N/A
Lateolabrax_maculatus_GLEAN_10015252	black	4.82634	TMEM125	Transmembrane protein 125	#N/A	#N/A	#N/A
Lateolabrax_maculatus_GLEAN_10007827	black	4.82562	-	Zgc 136870	#N/A	#N/A	#N/A
Lateolabrax_maculatus_GLEAN_10005924	black	4.82369	-	Syntaxin-binding protein 4-like	#N/A	#N/A	#N/A
Lateolabrax_maculatus_GLEAN_10017294	black	4.82313	NOC2L	Nucleolar complex associated 2 homolog (S. cerevisiae)	#N/A	#N/A	#N/A
Lateolabrax_maculatus_GLEAN_10008736	black	4.82227	VGF	Neurosecretory protein	#N/A	#N/A	#N/A
Lateolabrax_maculatus_GLEAN_10005151	black	4.81275	GPSM2	G-protein signalling modulator 2 (AGS3-like, C. elegans)	#N/A	#N/A	#N/A
Lateolabrax_maculatus_GLEAN_10003518	black	4.80804	-	Insulin / insulin-like growth factor / relaxin family.	#N/A	#N/A	#N/A
Lateolabrax_maculatus_GLEAN_10011385	black	4.8032	NOM1	Nucleolar protein with MIF4G domain 1	#N/A	0.04	#N/A
Lateolabrax_maculatus_GLEAN_10002555	black	4.79075	GNG2	Guanine nucleotide-binding proteins (G proteins) are involved as a modulator or transducer in various transmembrane signaling systems. The beta and gamma chains are required for the GTPase activity, for replacement of GDP by GTP, and for G protein- effector interaction	#N/A	#N/A	#N/A
Lateolabrax_maculatus_GLEAN_10018161	black	4.78469	-	Tripartite motif containing 105	#N/A	#N/A	#N/A
Lateolabrax_maculatus_GLEAN_10012544	black	4.7842	UTS2R	Belongs to the G-protein coupled receptor 1 family	#N/A	#N/A	#N/A
Lateolabrax_maculatus_GLEAN_10002132	black	4.75385	MASP1	Mannan-binding lectin serine	#N/A	#N/A	#N/A
Lateolabrax_maculatus_GLEAN_10002867	black	4.73043	MACF1	Microtubule-actin cross-linking factor 1	#N/A	#N/A	#N/A
Lateolabrax_maculatus_GLEAN_10001136	black	4.70769	FSD1	Fibronectin type III and SPRY	#N/A	#N/A	#N/A
Lateolabrax_maculatus_GLEAN_10011331	black	4.69117	SMYD3	SET and MYND domain containing 3	#N/A	#N/A	#N/A
Lateolabrax_maculatus_GLEAN_10015998	black	4.68904	MSL2	Male-specific lethal 2 homolog a (Drosophila)	#N/A	#N/A	#N/A
Lateolabrax_maculatus_GLEAN_10005285	black	4.68678	Gpr183	G-protein coupled receptor	#N/A	#N/A	#N/A
Lateolabrax_maculatus_GLEAN_10019618	black	4.68363	-	Reverse transcriptase (RNA-dependent DNA polymerase)	#N/A	#N/A	#N/A
Lateolabrax_maculatus_GLEAN_10012240	black	4.6554	RHOB	Ras homolog family member B	#N/A	#N/A	#N/A
Lateolabrax_maculatus_GLEAN_10015704	black	4.64461	-	Lysyl oxidase-like 5a	#N/A	#N/A	#N/A
Lateolabrax_maculatus_GLEAN_10018767	black	4.62034	FRS3	Fibroblast growth factor receptor substrate 3	#N/A	#N/A	#N/A
Lateolabrax_maculatus_GLEAN_10015013	black	4.6156	TYMP	Catalyzes the reversible phosphorolysis of thymidine. The produced molecules are then utilized as carbon and energy sources or in the rescue of pyrimidine bases for nucleotide synthesis	#N/A	#N/A	#N/A
Lateolabrax_maculatus_GLEAN_10018779	black	4.60559	MYH1	Myosin, heavy chain	#N/A	#N/A	#N/A
Lateolabrax_maculatus_GLEAN_10011116	black	4.60265	EPHX2	Epoxide hydrolase 2	#N/A	#N/A	#N/A
Lateolabrax_maculatus_GLEAN_10008849	black	4.59958	NHSL1	NHS-like 1b	#N/A	#N/A	#N/A
Lateolabrax_maculatus_GLEAN_10002624	black	4.58741	ME1	Malic enzyme 1, NADP( )-dependent, cytosolic	#N/A	#N/A	#N/A
Lateolabrax_maculatus_GLEAN_10004814	black	4.57536	PDGFA	platelet-derived growth factor	#N/A	#N/A	#N/A
Lateolabrax_maculatus_GLEAN_10000421	black	4.56747	MAPT	Microtubule-associated protein	#N/A	#N/A	#N/A
Lateolabrax_maculatus_GLEAN_10011910	black	4.56162	TGM7	Transglutaminase 2, like	#N/A	#N/A	#N/A
Lateolabrax_maculatus_GLEAN_10012094	black	4.54872	RAB11FIP1	RAB11 family interacting protein 1 (class I)	#N/A	#N/A	#N/A
Lateolabrax_maculatus_GLEAN_10000561	black	4.52405	COQ2	Catalyzes the prenylation of para-hydroxybenzoate (PHB) with an all-trans polyprenyl group. Mediates the second step in the final reaction sequence of coenzyme Q (CoQ) biosynthesis, which is the condensation of the polyisoprenoid side chain with PHB, generating the first membrane-bound Q intermediate	#N/A	#N/A	#N/A
Lateolabrax_maculatus_GLEAN_10013198	black	4.51364	OGDH	Oxoglutarate (alpha-ketoglutarate) dehydrogenase b (lipoamide)	#N/A	#N/A	#N/A
Lateolabrax_maculatus_GLEAN_10012434	black	4.46061	-	Pleckstrin homology domain.	#N/A	#N/A	#N/A
Lateolabrax_maculatus_GLEAN_10010435	black	4.45237	-	isoform X1	#N/A	#N/A	#N/A
Lateolabrax_maculatus_GLEAN_10022505	black	4.4486	CCDC11	coiled-coil domain-containing protein	#N/A	#N/A	#N/A
Lateolabrax_maculatus_GLEAN_10007690	black	4.44739	STPG1	O(6)-methylguanine-induced apoptosis	#N/A	#N/A	#N/A
Lateolabrax_maculatus_GLEAN_10018302	black	4.43757	DHX30	DEAH (Asp-Glu-Ala-His) box helicase 30	#N/A	#N/A	#N/A
Lateolabrax_maculatus_GLEAN_10017037	black	4.41184	MANEA	Mannosidase, endo-alpha	#N/A	#N/A	#N/A
Lateolabrax_maculatus_GLEAN_10015218	black	4.4114	#N/A	#N/A	#N/A	#N/A	#N/A
Lateolabrax_maculatus_GLEAN_10010409	black	4.4105	CASQ1	Calsequestrin is a high-capacity, moderate affinity, calcium-binding protein and thus acts as an internal calcium store in muscle	#N/A	#N/A	#N/A
Lateolabrax_maculatus_GLEAN_10005567	black	4.40877	TUBB4A	Tubulin is the major constituent of microtubules. It binds two moles of GTP, one at an exchangeable site on the beta chain and one at a non-exchangeable site on the alpha chain	#N/A	#N/A	#N/A
Lateolabrax_maculatus_GLEAN_10005315	black	4.4041	-	Zgc 153650	#N/A	#N/A	#N/A
Lateolabrax_maculatus_GLEAN_10017402	black	4.39431	SGK2	Serum glucocorticoid regulated kinase 2a	#N/A	#N/A	#N/A
Lateolabrax_maculatus_GLEAN_10010717	black	4.35575	ANXA2	Annexin A2a	#N/A	#N/A	#N/A
Lateolabrax_maculatus_GLEAN_10013334	black	4.35548	#N/A	#N/A	#N/A	#N/A	0.04
Lateolabrax_maculatus_GLEAN_10007580	black	4.3413	-	Heparan sulfate glucosamine 3-O-sulfotransferase	#N/A	#N/A	#N/A
Lateolabrax_maculatus_GLEAN_10004932	black	4.34002	TMEM163	Transmembrane protein 163-like	#N/A	#N/A	#N/A
Lateolabrax_maculatus_GLEAN_10010870	black	4.32454	CCDC135	Coiled-coil domain containing 135	#N/A	#N/A	0.04
Lateolabrax_maculatus_GLEAN_10010488	black	4.29258	TMF1	TATA element modulatory factor	#N/A	#N/A	0.04
Lateolabrax_maculatus_GLEAN_10017068	black	4.28838	KLHDC1	Kelch domain containing 1	#N/A	#N/A	#N/A
Lateolabrax_maculatus_GLEAN_10010886	black	4.28178	-	C-type lectin (CTL) or carbohydrate-recognition domain (CRD)	#N/A	#N/A	#N/A
Lateolabrax_maculatus_GLEAN_10010549	black	4.27761	GLB1L2	Beta-galactosidase-1-like protein 2	#N/A	0.04	0.04
Lateolabrax_maculatus_GLEAN_10018892	black	4.26216	-	DENN MADD domain containing 5B	#N/A	#N/A	#N/A
Lateolabrax_maculatus_GLEAN_10005110	black	4.25714	-	Immunoglobulin superfamily DCC subclass member 3-like	#N/A	#N/A	#N/A
Lateolabrax_maculatus_GLEAN_10003081	black	4.2515	BTBD6	BTB POZ domain-containing protein	#N/A	#N/A	#N/A
Lateolabrax_maculatus_GLEAN_10007270	black	4.25109	PLA2G4F	Phospholipase A2, group IVF	#N/A	#N/A	0.04
Lateolabrax_maculatus_GLEAN_10022182	black	4.24614	-	Reverse transcriptase (RNA-dependent DNA polymerase)	#N/A	#N/A	#N/A
Lateolabrax_maculatus_GLEAN_10015528	black	4.22322	KIAA1377	Centrosomal protein	#N/A	#N/A	#N/A
Lateolabrax_maculatus_GLEAN_10017078	black	4.22315	PTAFR	Belongs to the G-protein coupled receptor 1 family	#N/A	#N/A	#N/A
Lateolabrax_maculatus_GLEAN_10018802	black	4.2189	SYNM	Belongs to the intermediate filament family	#N/A	#N/A	#N/A
Lateolabrax_maculatus_GLEAN_10019692	black	4.21431	-	-	#N/A	#N/A	#N/A
Lateolabrax_maculatus_GLEAN_10019127	black	4.20879	HNF1A	HNF1 homeobox a	#N/A	#N/A	#N/A
Lateolabrax_maculatus_GLEAN_10004784	black	4.20735	#N/A	#N/A	#N/A	#N/A	#N/A
Lateolabrax_maculatus_GLEAN_10017732	black	4.19477	DUPD1	protein tyrosine/serine/threonine phosphatase activity	#N/A	#N/A	#N/A
Lateolabrax_maculatus_GLEAN_10002197	black	4.17989	LCOR	Ligand dependent nuclear receptor corepressor	#N/A	#N/A	#N/A
Lateolabrax_maculatus_GLEAN_10014820	black	4.17965	MAST2	Microtubule associated serine threonine kinase 2	#N/A	#N/A	0.04
Lateolabrax_maculatus_GLEAN_10008581	black	4.15471	atf7ip2	Activating transcription factor 7-interacting protein	#N/A	#N/A	#N/A
Lateolabrax_maculatus_GLEAN_10014612	black	4.15338	MFGE8	Milk fat globule-EGF factor 8 protein a	#N/A	#N/A	#N/A
Lateolabrax_maculatus_GLEAN_10000491	black	4.14804	-	Sialoadhesin-like	0.04	#N/A	0.04
Lateolabrax_maculatus_GLEAN_10021390	black	4.14475	-	Reverse transcriptase (RNA-dependent DNA polymerase)	#N/A	#N/A	#N/A
Lateolabrax_maculatus_GLEAN_10018873	black	4.14264	NUDT7	Nudix (nucleoside diphosphate linked moiety X)-type motif 7	#N/A	#N/A	#N/A
Lateolabrax_maculatus_GLEAN_10009319	black	4.10855	-	Si ch211-198n5.11	#N/A	#N/A	#N/A
Lateolabrax_maculatus_GLEAN_10019531	black	4.10715	-	Plays a major role in tight junction-specific obliteration of the intercellular space, through calcium- independent cell-adhesion activity	#N/A	#N/A	#N/A
Lateolabrax_maculatus_GLEAN_10009618	black	4.10354	-	Alcohol dehydrogenase class-3-like	#N/A	#N/A	#N/A
Lateolabrax_maculatus_GLEAN_10011894	black	4.08583	FSTL4	Follistatin-like 4	0.04	0.04	0.04
Lateolabrax_maculatus_GLEAN_10013691	black	4.08096	-	Si ch211-160b11.4	#N/A	#N/A	#N/A
Lateolabrax_maculatus_GLEAN_10002674	black	4.06801	ZC3H3	zinc finger	#N/A	#N/A	#N/A
Lateolabrax_maculatus_GLEAN_10009520	black	4.06084	SNRNP48	small nuclear ribonucleoprotein 48	#N/A	#N/A	#N/A
Lateolabrax_maculatus_GLEAN_10004021	black	4.05158	ARL3	Belongs to the small GTPase superfamily. Arf family	#N/A	#N/A	#N/A
Lateolabrax_maculatus_GLEAN_10002938	black	4.05049	-	Potassium voltage-gated channel subfamily KQT member 1-like	#N/A	#N/A	#N/A
Lateolabrax_maculatus_GLEAN_10021418	black	4.03853	-	Immunoglobulin V-set domain	#N/A	#N/A	#N/A
Lateolabrax_maculatus_GLEAN_10010328	black	4.03772	SSRP1	Component of the FACT complex, a general chromatin factor that acts to reorganize nucleosomes. The FACT complex is involved in multiple processes that require DNA as a template such as mRNA elongation, DNA replication and DNA repair. During transcription elongation the FACT complex acts as a histone chaperone that both destabilizes and restores nucleosomal structure. It facilitates the passage of…	#N/A	#N/A	#N/A
Lateolabrax_maculatus_GLEAN_10004877	black	4.0063	ATG4D	Cysteine protease	#N/A	#N/A	#N/A
Lateolabrax_maculatus_GLEAN_10013886	black	4.00392	B4GALNT2	Beta-1,4 N-acetylgalactosaminyltransferase 2-like	#N/A	#N/A	#N/A
Lateolabrax_maculatus_GLEAN_10011330	black	3.99866	SMYD3	SET and MYND domain containing 3	#N/A	#N/A	#N/A
Lateolabrax_maculatus_GLEAN_10011693	black	3.99525	-	Zgc 66447	#N/A	#N/A	#N/A
Lateolabrax_maculatus_GLEAN_10010687	black	3.98906	C19orf26	Chromosome 19 open reading frame 26	#N/A	#N/A	#N/A
Lateolabrax_maculatus_GLEAN_10014494	black	3.98641	SGCZ	Sarcoglycan, zeta	#N/A	#N/A	#N/A
Lateolabrax_maculatus_GLEAN_10013987	black	3.96543	MND1	Required for proper homologous chromosome pairing and efficient cross-over and intragenic recombination during meiosis	#N/A	#N/A	#N/A
Lateolabrax_maculatus_GLEAN_10017778	black	3.96502	GPR75	G protein-coupled receptor 75	#N/A	#N/A	#N/A
Lateolabrax_maculatus_GLEAN_10018069	black	3.95757	HDX	Highly divergent homeobox	#N/A	#N/A	#N/A
Lateolabrax_maculatus_GLEAN_10018514	black	3.9517	FANCC	Fanconi anemia, complementation group C	#N/A	#N/A	#N/A
Lateolabrax_maculatus_GLEAN_10013922	black	3.90577	-	Regulator of G protein signalling domain	#N/A	#N/A	#N/A
Lateolabrax_maculatus_GLEAN_10009697	black	3.90211	HS3ST3A1	Belongs to the sulfotransferase 1 family	#N/A	#N/A	#N/A
Lateolabrax_maculatus_GLEAN_10005354	black	3.89247	PDK1	Pyruvate dehydrogenase kinase, isozyme 1	#N/A	#N/A	#N/A
Lateolabrax_maculatus_GLEAN_10016438	black	3.88901	-	Tumor protein p53-inducible nuclear protein	#N/A	#N/A	#N/A
Lateolabrax_maculatus_GLEAN_10010987	black	3.88774	-	Arf-GAP with coiled-coil, ANK repeat and PH domain-containing protein	#N/A	#N/A	#N/A
Lateolabrax_maculatus_GLEAN_10014896	black	3.8793	TPRKB	Belongs to the CGI121 TPRKB family	#N/A	#N/A	#N/A
Lateolabrax_maculatus_GLEAN_10020702	black	3.86964	-	Reverse transcriptase (RNA-dependent DNA polymerase)	#N/A	#N/A	#N/A
Lateolabrax_maculatus_GLEAN_10012608	black	3.85255	PARP6	Poly (ADP-ribose) polymerase	#N/A	#N/A	#N/A
Lateolabrax_maculatus_GLEAN_10020941	black	3.8377	-	Reverse transcriptase (RNA-dependent DNA polymerase)	#N/A	#N/A	#N/A
Lateolabrax_maculatus_GLEAN_10022814	black	3.83764	-	Scavenger receptor Cys-rich	#N/A	#N/A	#N/A
Lateolabrax_maculatus_GLEAN_10020146	black	3.83213	GP1BB	glycoprotein Ib	#N/A	#N/A	#N/A
Lateolabrax_maculatus_GLEAN_10016701	black	3.82296	C10orf105	protein C10orf105 homolog	#N/A	#N/A	#N/A
Lateolabrax_maculatus_GLEAN_10002715	black	3.80703	VAMP3	positive regulation of receptor recycling	#N/A	#N/A	#N/A
Lateolabrax_maculatus_GLEAN_10018678	black	3.80292	CCDC30	Domain of unknown function (DUF4686)	#N/A	#N/A	#N/A
Lateolabrax_maculatus_GLEAN_10022145	black	3.80289	TRAV20	T cell receptor alpha variable	#N/A	#N/A	#N/A
Lateolabrax_maculatus_GLEAN_10010285	black	3.80171	SPATA1	Spermatogenesis-associated protein	#N/A	#N/A	#N/A
Lateolabrax_maculatus_GLEAN_10016894	black	3.79814	EFHB	family member	#N/A	#N/A	#N/A
Lateolabrax_maculatus_GLEAN_10020448	black	3.79059	#N/A	#N/A	#N/A	#N/A	#N/A
Lateolabrax_maculatus_GLEAN_10001154	black	3.79007	PKMYT1	Protein kinase, membrane associated tyrosine threonine 1	#N/A	#N/A	#N/A
Lateolabrax_maculatus_GLEAN_10005693	black	3.78425	-	Serum glucocorticoid regulated kinase 2b	#N/A	#N/A	#N/A
Lateolabrax_maculatus_GLEAN_10008409	black	3.78025	PNPLA2	Patatin-like phospholipase domain containing 2	#N/A	#N/A	#N/A
Lateolabrax_maculatus_GLEAN_10012848	black	3.75892	ABHD8	Abhydrolase domain containing 8a	#N/A	#N/A	0.04
Lateolabrax_maculatus_GLEAN_10011690	black	3.73043	-	7 transmembrane receptor (rhodopsin family)	#N/A	#N/A	#N/A
Lateolabrax_maculatus_GLEAN_10005524	black	3.70058	UGT2A3	UDP glucuronosyltransferase 5 family, polypeptide A1	#N/A	#N/A	#N/A
Lateolabrax_maculatus_GLEAN_10022983	black	3.69691	NIPAL2	NIPA-like domain containing 2	#N/A	#N/A	#N/A
Lateolabrax_maculatus_GLEAN_10005053	black	3.69577	DNAH17	ATP-dependent microtubule motor activity, minus-end-directed	#N/A	#N/A	#N/A
Lateolabrax_maculatus_GLEAN_10001366	black	3.67926	UGT2A3	UDP glucuronosyltransferase 5 family, polypeptide G1	#N/A	#N/A	#N/A
Lateolabrax_maculatus_GLEAN_10008259	black	3.66512	ATE1	Involved in the post-translational conjugation of arginine to the N-terminal aspartate or glutamate of a protein. This arginylation is required for degradation of the protein via the ubiquitin pathway	#N/A	#N/A	#N/A
Lateolabrax_maculatus_GLEAN_10014994	black	3.66185	-	nucleosome assembly	#N/A	#N/A	#N/A
Lateolabrax_maculatus_GLEAN_10007257	black	3.65811	RASGRP3	RAS guanyl releasing protein 3 (calcium and DAG-regulated)	#N/A	#N/A	#N/A
Lateolabrax_maculatus_GLEAN_10002321	black	3.64268	GSG1	-	#N/A	#N/A	0.04
Lateolabrax_maculatus_GLEAN_10014750	black	3.64142	ACSL3	Acyl-CoA synthetase long-chain family member	#N/A	#N/A	#N/A
Lateolabrax_maculatus_GLEAN_10009096	black	3.63768	SEC22A	SEC22 vesicle trafficking protein homolog A (S. cerevisiae)	#N/A	#N/A	#N/A
Lateolabrax_maculatus_GLEAN_10017511	black	3.63141	KRT8	Belongs to the intermediate filament family	#N/A	#N/A	#N/A
Lateolabrax_maculatus_GLEAN_10016871	black	3.61461	-	Cadherin 26, tandem duplicate 2	#N/A	#N/A	#N/A
Lateolabrax_maculatus_GLEAN_10008299	black	3.59665	MKX	Mohawk homeobox	#N/A	#N/A	#N/A
Lateolabrax_maculatus_GLEAN_10018775	black	3.58819	SLC26A6	Solute carrier family 26 member	#N/A	#N/A	#N/A
Lateolabrax_maculatus_GLEAN_10003841	black	3.58105	PLAU	Plasminogen activator, urokinase b	#N/A	#N/A	#N/A
Lateolabrax_maculatus_GLEAN_10012088	black	3.56424	AAK1	AP2 associated kinase 1	#N/A	#N/A	#N/A
Lateolabrax_maculatus_GLEAN_10001892	black	3.56013	MASP1	Mannan-binding lectin serine	#N/A	#N/A	0.04
Lateolabrax_maculatus_GLEAN_10021745	black	3.55647	-	Reverse transcriptase (RNA-dependent DNA polymerase)	#N/A	#N/A	#N/A
Lateolabrax_maculatus_GLEAN_10013143	black	3.55126	TRAK1	Trafficking protein, kinesin binding 1	#N/A	#N/A	#N/A
Lateolabrax_maculatus_GLEAN_10021357	black	3.55042	-	Immunoglobulin V-Type	0.04	#N/A	#N/A
Lateolabrax_maculatus_GLEAN_10015004	black	3.54204	-	cell surface receptor signaling pathway	#N/A	#N/A	#N/A
Lateolabrax_maculatus_GLEAN_10005628	black	3.53495	PDLIM5	PDZ and LIM domain	#N/A	#N/A	#N/A
Lateolabrax_maculatus_GLEAN_10018271	black	3.52527	ZNF521	Zinc finger protein	#N/A	#N/A	#N/A
Lateolabrax_maculatus_GLEAN_10004729	black	3.52083	CES5A	Belongs to the type-B carboxylesterase lipase family	#N/A	#N/A	#N/A
Lateolabrax_maculatus_GLEAN_10009324	black	3.51201	-	Complement factor	#N/A	#N/A	#N/A
Lateolabrax_maculatus_GLEAN_10004608	black	3.50513	-	Interleukin-17	#N/A	#N/A	#N/A
Lateolabrax_maculatus_GLEAN_10017975	black	3.49973	CHIT1	Belongs to the glycosyl hydrolase 18 family	#N/A	#N/A	#N/A
Lateolabrax_maculatus_GLEAN_10016981	black	3.48935	POPDC3	Popeye domain containing 3	#N/A	#N/A	#N/A
Lateolabrax_maculatus_GLEAN_10022705	black	3.47509	MXI1	MAX interactor 1, dimerization protein	#N/A	#N/A	#N/A
Lateolabrax_maculatus_GLEAN_10019999	black	3.47381	THAP2	THAP domain containing	#N/A	#N/A	#N/A
Lateolabrax_maculatus_GLEAN_10021243	black	3.46506	-	Transposase	#N/A	#N/A	#N/A
Lateolabrax_maculatus_GLEAN_10014027	black	3.45773	-	Brambleberry	#N/A	#N/A	#N/A
Lateolabrax_maculatus_GLEAN_10009989	black	3.45723	#N/A	#N/A	#N/A	#N/A	#N/A
Lateolabrax_maculatus_GLEAN_10014644	black	3.45645	HAS3	Hyaluronan synthase 3	#N/A	#N/A	#N/A
Lateolabrax_maculatus_GLEAN_10012392	black	3.45377	SPR	Sepiapterin reductase	#N/A	#N/A	0.04
Lateolabrax_maculatus_GLEAN_10005321	black	3.43121	LYL1	Lymphoblastic leukemia associated hematopoiesis regulator 1	#N/A	#N/A	#N/A
Lateolabrax_maculatus_GLEAN_10013503	black	3.42413	BHLHA15	Basic helix-loop-helix family member a15	#N/A	#N/A	#N/A
Lateolabrax_maculatus_GLEAN_10010890	black	3.42393	KCND1	Potassium voltage-gated channel, Shal-related subfamily, member 1	#N/A	#N/A	#N/A
Lateolabrax_maculatus_GLEAN_10003844	black	3.42308	-	Endonuclease domain-containing 1 protein-like	#N/A	#N/A	#N/A
Lateolabrax_maculatus_GLEAN_10008562	black	3.42157	PTX4	Pentraxin 4, long	#N/A	#N/A	#N/A
Lateolabrax_maculatus_GLEAN_10021585	black	3.4201	-	Ribonuclease H protein	#N/A	#N/A	#N/A
Lateolabrax_maculatus_GLEAN_10007339	black	3.41441	SCN5A	Sodium channel protein	#N/A	#N/A	#N/A
Lateolabrax_maculatus_GLEAN_10018987	black	3.41341	FPGS	Folylpolyglutamate synthase	#N/A	#N/A	#N/A
Lateolabrax_maculatus_GLEAN_10021671	black	3.39602	-	Reverse transcriptase (RNA-dependent DNA polymerase)	#N/A	#N/A	#N/A
Lateolabrax_maculatus_GLEAN_10016758	black	3.39514	-	snail homolog	#N/A	#N/A	#N/A
Lateolabrax_maculatus_GLEAN_10000576	black	3.38404	-	Zinc finger protein	#N/A	#N/A	#N/A
Lateolabrax_maculatus_GLEAN_10009361	black	3.34819	FUNDC1	FUN14 domain containing 1	#N/A	#N/A	#N/A
Lateolabrax_maculatus_GLEAN_10016354	black	3.34429	TMED4	Transmembrane emp24 protein transport domain containing 4	#N/A	#N/A	#N/A
Lateolabrax_maculatus_GLEAN_10002299	black	3.33529	-	Si dkey-81h8.1	#N/A	#N/A	#N/A
Lateolabrax_maculatus_GLEAN_10022670	black	3.33416	-	RING finger protein 122-like	#N/A	#N/A	#N/A
Lateolabrax_maculatus_GLEAN_10021006	black	3.32773	-	-	#N/A	#N/A	#N/A
Lateolabrax_maculatus_GLEAN_10006808	black	3.31626	-	Immunoglobulin V-set domain	#N/A	#N/A	#N/A
Lateolabrax_maculatus_GLEAN_10022694	black	3.31403	HIC2	Hypermethylated in cancer	#N/A	#N/A	#N/A
Lateolabrax_maculatus_GLEAN_10021709	black	3.28473	-	RNA-directed DNA polymerase activity	#N/A	#N/A	#N/A
Lateolabrax_maculatus_GLEAN_10006786	black	3.25533	PCYT1B	Phosphate cytidylyltransferase 1, choline, beta b	#N/A	#N/A	#N/A
Lateolabrax_maculatus_GLEAN_10001814	black	3.24807	CCDC62	Huntingtin interacting protein 1 related a	#N/A	#N/A	#N/A
Lateolabrax_maculatus_GLEAN_10021218	black	3.24169	-	Reverse transcriptase (RNA-dependent DNA polymerase)	#N/A	#N/A	#N/A
Lateolabrax_maculatus_GLEAN_10003359	black	3.22598	NOP14	Nucleolar protein	#N/A	#N/A	#N/A
Lateolabrax_maculatus_GLEAN_10013712	black	3.21748	XKR6	XK, Kell blood group complex subunit-related family, member 6	#N/A	#N/A	#N/A
Lateolabrax_maculatus_GLEAN_10013349	black	3.2148	ADCK5	aarF domain containing kinase 5	#N/A	#N/A	#N/A
Lateolabrax_maculatus_GLEAN_10017673	black	3.21237	RSRP1	Arginine serine-rich protein 1	#N/A	#N/A	#N/A
Lateolabrax_maculatus_GLEAN_10004277	black	3.14357	TRIM7	E3 ubiquitin-protein ligase	#N/A	#N/A	#N/A
Lateolabrax_maculatus_GLEAN_10018188	black	3.13813	-	-	#N/A	#N/A	#N/A
Lateolabrax_maculatus_GLEAN_10013761	black	3.11979	ELOVL4	Catalyzes the first and rate-limiting reaction of the four that constitute the long-chain fatty acids elongation cycle. This endoplasmic reticulum-bound enzymatic process, allows the addition of 2 carbons to the chain of long- and very long-chain fatty acids VLCFAs per cycle. Condensing enzyme that specifically elongates C24 0 and C26 0 acyl-CoAs. May participate to the production of saturated an…	#N/A	#N/A	#N/A
Lateolabrax_maculatus_GLEAN_10011443	black	3.09054	-	Lectin, galactoside-binding, soluble	#N/A	#N/A	#N/A
Lateolabrax_maculatus_GLEAN_10011193	black	3.08808	GJC1	One gap junction consists of a cluster of closely packed pairs of transmembrane channels, the connexons, through which materials of low MW diffuse from one cell to a neighboring cell	#N/A	#N/A	#N/A
Lateolabrax_maculatus_GLEAN_10010649	black	3.08621	creb5	Cyclic AMP-responsive element-binding protein	#N/A	#N/A	#N/A
Lateolabrax_maculatus_GLEAN_10008957	black	3.08614	RELL1	RELT-like	#N/A	#N/A	#N/A
Lateolabrax_maculatus_GLEAN_10006540	black	3.08457	TLN2	Talin 2a	#N/A	#N/A	#N/A
Lateolabrax_maculatus_GLEAN_10005612	black	3.08306	NPAT	Nuclear protein, ataxia-telangiectasia locus	#N/A	#N/A	#N/A
Lateolabrax_maculatus_GLEAN_10020672	black	3.08174	Gstt1	Glutathione S-transferase theta 2	#N/A	#N/A	#N/A
Lateolabrax_maculatus_GLEAN_10009969	black	3.07687	CD58	Lymphocyte function-associated antigen 3	#N/A	#N/A	#N/A
Lateolabrax_maculatus_GLEAN_10005994	black	3.05823	-	Zinc finger protein	#N/A	#N/A	#N/A
Lateolabrax_maculatus_GLEAN_10015859	black	3.04422	PRICKLE3	Prickle homolog 3 (Drosophila)	#N/A	#N/A	#N/A
Lateolabrax_maculatus_GLEAN_10003679	black	3.0204	-	Plays a major role in tight junction-specific obliteration of the intercellular space, through calcium- independent cell-adhesion activity	#N/A	#N/A	#N/A
Lateolabrax_maculatus_GLEAN_10012921	black	3.00497	SENP5	SUMO sentrin specific peptidase 5	#N/A	#N/A	#N/A
Lateolabrax_maculatus_GLEAN_10016795	black	3.00279	GRIP2	Glutamate receptor interacting protein	#N/A	#N/A	#N/A
Lateolabrax_maculatus_GLEAN_10002717	black	3.00162	MXRA8	Matrix-remodelling associated 8a	#N/A	#N/A	#N/A
Lateolabrax_maculatus_GLEAN_10014193	black	2.97745	CMBL	Carboxymethylenebutenolidase homolog	#N/A	#N/A	#N/A
Lateolabrax_maculatus_GLEAN_10005896	black	2.97629	GLDC	Glycine dehydrogenase (decarboxylating)	#N/A	#N/A	#N/A
Lateolabrax_maculatus_GLEAN_10007391	black	2.97023	AVPR1A	Arginine vasopressin receptor	#N/A	#N/A	#N/A
Lateolabrax_maculatus_GLEAN_10004143	black	2.96766	-	-	#N/A	#N/A	#N/A
Lateolabrax_maculatus_GLEAN_10022439	black	2.95063	-	Sialoadhesin-like	#N/A	#N/A	#N/A
Lateolabrax_maculatus_GLEAN_10008510	black	2.94668	HINFP	Histone H4 transcription factor	#N/A	#N/A	#N/A
Lateolabrax_maculatus_GLEAN_10018900	black	2.94576	ahcyl2	S-adenosylhomocysteine hydrolase-like 2	#N/A	#N/A	#N/A
Lateolabrax_maculatus_GLEAN_10004157	black	2.93766	SLC7A9	Solute carrier family 7 (cationic amino acid transporter, y system), member 9	#N/A	#N/A	#N/A
Lateolabrax_maculatus_GLEAN_10021704	black	2.93736	-	Ribonuclease H protein	#N/A	#N/A	#N/A
Lateolabrax_maculatus_GLEAN_10018359	black	2.93673	PTH1R	Parathyroid hormone	#N/A	#N/A	#N/A
Lateolabrax_maculatus_GLEAN_10018534	black	2.90882	MAPK4	Mitogen-activated protein kinase 4	#N/A	#N/A	#N/A
Lateolabrax_maculatus_GLEAN_10012071	black	2.89827	EGR3	early growth response	#N/A	#N/A	#N/A
Lateolabrax_maculatus_GLEAN_10010056	black	2.89062	-	-	#N/A	#N/A	0.04
Lateolabrax_maculatus_GLEAN_10002736	black	2.89036	-	Regulator of G protein signaling domain	#N/A	#N/A	#N/A
Lateolabrax_maculatus_GLEAN_10016802	black	2.88685	ABHD6	Abhydrolase domain containing 6b	#N/A	#N/A	#N/A
Lateolabrax_maculatus_GLEAN_10016568	black	2.88525	FAM3A	Family with sequence similarity 3, member A	#N/A	#N/A	#N/A
Lateolabrax_maculatus_GLEAN_10016269	black	2.8803	EPG5	protein 5 homolog	#N/A	#N/A	#N/A
Lateolabrax_maculatus_GLEAN_10008177	black	2.87905	FIGN	Belongs to the AAA ATPase family	#N/A	#N/A	#N/A
Lateolabrax_maculatus_GLEAN_10022602	black	2.87365	im:7160594	Major facilitator superfamily domain-containing protein 1-like	#N/A	#N/A	#N/A
Lateolabrax_maculatus_GLEAN_10016691	black	2.86218	HERC4	HECT and RLD domain containing E3 ubiquitin protein ligase 4	#N/A	#N/A	#N/A
Lateolabrax_maculatus_GLEAN_10018773	black	2.8469	CCDC36	coiled-coil domain-containing protein	#N/A	#N/A	#N/A
Lateolabrax_maculatus_GLEAN_10006515	black	2.83541	GRAMD3	GRAM domain containing 3	#N/A	#N/A	#N/A
Lateolabrax_maculatus_GLEAN_10013431	black	2.83149	-	BAALC N-terminus	#N/A	#N/A	#N/A
Lateolabrax_maculatus_GLEAN_10022759	black	2.82431	-	Function to find	#N/A	#N/A	#N/A
Lateolabrax_maculatus_GLEAN_10021645	black	2.82232	-	Pao retrotransposon peptidase	#N/A	#N/A	#N/A
Lateolabrax_maculatus_GLEAN_10005949	black	2.81698	#N/A	#N/A	#N/A	#N/A	#N/A
Lateolabrax_maculatus_GLEAN_10001880	black	2.80914	pat-3	integrin	#N/A	#N/A	#N/A
Lateolabrax_maculatus_GLEAN_10021750	black	2.80047	PCDHGA12	protocadherin	#N/A	#N/A	#N/A
Lateolabrax_maculatus_GLEAN_10019298	black	2.79785	#N/A	#N/A	#N/A	#N/A	#N/A
Lateolabrax_maculatus_GLEAN_10010251	black	2.79422	DCTN6	Dynactin subunit 6	#N/A	0.04	#N/A
Lateolabrax_maculatus_GLEAN_10005074	black	2.79201	EIF3E	component of the eukaryotic translation initiation factor 3 (eIF-3) complex, which is involved in protein synthesis of a specialized repertoire of mRNAs and, together with other initiation factors, stimulates binding of mRNA and methionyl-tRNAi to the 40S ribosome. The eIF-3 complex specifically targets and initiates translation of a subset of mRNAs involved in cell proliferation	#N/A	#N/A	#N/A
Lateolabrax_maculatus_GLEAN_10013414	black	2.78871	-	cilium movement involved in cell motility	#N/A	#N/A	#N/A
Lateolabrax_maculatus_GLEAN_10015288	black	2.77519	-	Gamma-glutamyltranspeptidase 2-like	#N/A	#N/A	#N/A
Lateolabrax_maculatus_GLEAN_10012362	black	2.75675	MAFK	V-maf musculoaponeurotic fibrosarcoma oncogene homolog K (avian)	#N/A	#N/A	#N/A
Lateolabrax_maculatus_GLEAN_10011965	black	2.75107	arpp21	phosphoprotein, 21	#N/A	#N/A	#N/A
Lateolabrax_maculatus_GLEAN_10009412	black	2.74969	AXDND1	Axonemal dynein light chain domain containing 1	#N/A	#N/A	#N/A
Lateolabrax_maculatus_GLEAN_10005107	black	2.73146	BNIPL	Bcl-2 adenovirus E1B	#N/A	#N/A	#N/A
Lateolabrax_maculatus_GLEAN_10016980	black	2.73065	BVES	Blood vessel epicardial	#N/A	#N/A	#N/A
Lateolabrax_maculatus_GLEAN_10005563	black	2.72593	#N/A	#N/A	#N/A	#N/A	#N/A
Lateolabrax_maculatus_GLEAN_10005450	black	2.72554	KIAA0141	Zgc 158257	#N/A	#N/A	#N/A
Lateolabrax_maculatus_GLEAN_10022116	black	2.71766	-	C-type lectin (CTL) or carbohydrate-recognition domain (CRD)	#N/A	#N/A	#N/A
Lateolabrax_maculatus_GLEAN_10011131	black	2.71739	FMNL1	Formin-like	#N/A	#N/A	#N/A
Lateolabrax_maculatus_GLEAN_10010262	black	2.71721	CXCL6	c-X-C motif	#N/A	#N/A	#N/A
Lateolabrax_maculatus_GLEAN_10017950	black	2.71329	-	Zinc finger, C2H2 type	#N/A	#N/A	#N/A
Lateolabrax_maculatus_GLEAN_10006568	black	2.71175	PEX11A	Peroxisomal biogenesis factor 11 alpha	#N/A	#N/A	#N/A
Lateolabrax_maculatus_GLEAN_10021859	black	2.705	-	antigen binding	#N/A	#N/A	#N/A
Lateolabrax_maculatus_GLEAN_10006573	black	2.70287	-	ADP-ribosylation factor interacting protein 2a	#N/A	#N/A	#N/A
Lateolabrax_maculatus_GLEAN_10021365	black	2.70264	CD97	Belongs to the G-protein coupled receptor 2 family	#N/A	#N/A	#N/A
Lateolabrax_maculatus_GLEAN_10000015	black	2.70016	PTS	6-pyruvoyltetrahydropterin synthase	#N/A	#N/A	#N/A
Lateolabrax_maculatus_GLEAN_10009219	black	2.69981	SMARCB1	SWI SNF related, matrix associated, actin dependent regulator of chromatin, subfamily b, member 1b	#N/A	#N/A	0.04
Lateolabrax_maculatus_GLEAN_10001681	black	2.69129	LINGO2	Leucine rich repeat and Ig domain containing 2	#N/A	#N/A	#N/A
Lateolabrax_maculatus_GLEAN_10019254	black	2.68619	#N/A	#N/A	#N/A	#N/A	#N/A
Lateolabrax_maculatus_GLEAN_10000716	black	2.68352	AARSD1	alanyl-tRNA editing protein	#N/A	#N/A	#N/A
Lateolabrax_maculatus_GLEAN_10011605	black	2.68022	brinp2	Bone morphogenic protein retinoic acid inducible neural-specific 2	#N/A	#N/A	0.04
Lateolabrax_maculatus_GLEAN_10017088	black	2.67937	TRNP1	nuclear protein	#N/A	#N/A	#N/A
Lateolabrax_maculatus_GLEAN_10023310	black	2.67929	SAMD3	sterile alpha motif	#N/A	#N/A	#N/A
Lateolabrax_maculatus_GLEAN_10007066	black	2.67695	ZNF804B	Zinc finger protein	#N/A	#N/A	#N/A
Lateolabrax_maculatus_GLEAN_10022990	black	2.63444	TRAM2	membrane protein 2	#N/A	#N/A	#N/A
Lateolabrax_maculatus_GLEAN_10022483	black	2.63387	-	Zinc finger protein	#N/A	#N/A	#N/A
Lateolabrax_maculatus_GLEAN_10004518	black	2.63204	osbpl7	Oxysterol binding protein-like 7	#N/A	#N/A	#N/A
Lateolabrax_maculatus_GLEAN_10005471	black	2.62589	BBS2	Bardet-Biedl syndrome 2	#N/A	#N/A	#N/A
Lateolabrax_maculatus_GLEAN_10002094	black	2.62088	NDUFA7	NADH dehydrogenase ubiquinone 1 alpha subcomplex	#N/A	#N/A	#N/A
Lateolabrax_maculatus_GLEAN_10001513	black	2.60143	-	Immunoglobulin like	#N/A	#N/A	#N/A
Lateolabrax_maculatus_GLEAN_10001300	black	2.59402	-	GTPase IMAP family member	#N/A	#N/A	#N/A
Lateolabrax_maculatus_GLEAN_10012254	black	2.59185	MRAP2	receptor aCCessory protein	#N/A	#N/A	#N/A
Lateolabrax_maculatus_GLEAN_10018343	black	2.58554	obscn	Obscurin	#N/A	#N/A	#N/A
Lateolabrax_maculatus_GLEAN_10021747	black	2.58125	-	Ribonuclease H protein	#N/A	#N/A	#N/A
Lateolabrax_maculatus_GLEAN_10005853	black	2.57982	-	Zgc 85777	#N/A	#N/A	#N/A
Lateolabrax_maculatus_GLEAN_10018587	black	2.5796	ST7L	Suppression of tumorigenicity 7 like	#N/A	#N/A	#N/A
Lateolabrax_maculatus_GLEAN_10005660	black	2.56921	SYCE2	Synaptonemal complex central element protein 2	#N/A	#N/A	#N/A
Lateolabrax_maculatus_GLEAN_10014472	black	2.56867	SNIP1	Smad nuclear interacting protein	#N/A	#N/A	#N/A
Lateolabrax_maculatus_GLEAN_10004556	black	2.56669	vwde	Von Willebrand factor D and EGF domain-containing protein-like	#N/A	#N/A	0.04
Lateolabrax_maculatus_GLEAN_10011826	black	2.56546	DAPK3	Death-associated protein kinase 3	#N/A	#N/A	#N/A
Lateolabrax_maculatus_GLEAN_10009889	black	2.56295	QTRTD1	Non-catalytic subunit of the queuine tRNA- ribosyltransferase (TGT) that catalyzes the base-exchange of a guanine (G) residue with queuine (Q) at position 34 (anticodon wobble position) in tRNAs with GU(N) anticodons (tRNA-Asp, -Asn, - His and -Tyr), resulting in the hypermodified nucleoside queuosine (7-(((4,5-cis-dihydroxy-2-cyclopenten-1-yl)amino)methyl)-7- deazaguanosine)	#N/A	#N/A	#N/A
Lateolabrax_maculatus_GLEAN_10007149	black	2.55878	DOCK3	dedicator of cytokinesis	#N/A	#N/A	#N/A
Lateolabrax_maculatus_GLEAN_10001740	black	2.55782	ST8SIA1	ST8 alpha-N-acetyl-neuraminide alpha-2,8-sialyltransferase 1	#N/A	#N/A	#N/A
Lateolabrax_maculatus_GLEAN_10022733	black	2.55549	NKIRAS1	NF-kappa-B inhibitor-interacting Ras-like protein 1	#N/A	#N/A	#N/A
Lateolabrax_maculatus_GLEAN_10006835	black	2.5437	FBXL14	F-box and leucine-rich repeat protein	#N/A	#N/A	#N/A
Lateolabrax_maculatus_GLEAN_10007952	black	2.5433	MYO7A	Belongs to the TRAFAC class myosin-kinesin ATPase superfamily. Myosin family	#N/A	#N/A	#N/A
Lateolabrax_maculatus_GLEAN_10005950	black	2.53878	FAM69B	Family with sequence similarity 69, member B	#N/A	#N/A	#N/A
Lateolabrax_maculatus_GLEAN_10000219	black	2.53846	EPC2	Enhancer of polycomb homolog 2	#N/A	#N/A	#N/A
Lateolabrax_maculatus_GLEAN_10015389	black	2.53293	KCNMB2	Calcium-activated potassium channel subunit	#N/A	#N/A	#N/A
Lateolabrax_maculatus_GLEAN_10010111	black	2.53005	FRMPD4	Toll-like receptor 7	#N/A	#N/A	#N/A
Lateolabrax_maculatus_GLEAN_10001410	black	2.52294	XKR5	XK-related protein 5-like	#N/A	#N/A	#N/A
Lateolabrax_maculatus_GLEAN_10013876	black	2.51772	C16orf89	Chromosome 16 open reading frame 89	#N/A	#N/A	#N/A
Lateolabrax_maculatus_GLEAN_10022338	black	2.50422	-	interleukin-8 biosynthetic process	#N/A	#N/A	#N/A
Lateolabrax_maculatus_GLEAN_10004545	black	2.50298	Hs3st-B	Heparan sulfate glucosamine 3-O-sulfotransferase	#N/A	#N/A	#N/A
Lateolabrax_maculatus_GLEAN_10011930	black	2.4764	HSBP1	Heat shock factor binding protein	#N/A	#N/A	#N/A
Lateolabrax_maculatus_GLEAN_10012745	black	2.47613	ramp1	Receptor (G protein-coupled) activity modifying protein 1	#N/A	#N/A	#N/A
Lateolabrax_maculatus_GLEAN_10015606	black	2.46891	-	Zinc finger protein	#N/A	#N/A	#N/A
Lateolabrax_maculatus_GLEAN_10012330	black	2.44583	-	Hemoglobin subunit	#N/A	#N/A	#N/A
Lateolabrax_maculatus_GLEAN_10022396	black	2.44498	-	interleukin-8 biosynthetic process	#N/A	#N/A	#N/A
Lateolabrax_maculatus_GLEAN_10011807	black	2.42694	-	Von Willebrand factor A domain-containing protein 7-like	#N/A	#N/A	#N/A
Lateolabrax_maculatus_GLEAN_10018293	black	2.41586	-	Belongs to the G-protein coupled receptor 1 family. Opsin subfamily	#N/A	#N/A	#N/A
Lateolabrax_maculatus_GLEAN_10007637	black	2.41419	ALPK3	Alpha-kinase 3	#N/A	#N/A	#N/A
Lateolabrax_maculatus_GLEAN_10006779	black	2.41266	GPR64	G-protein coupled receptor	#N/A	#N/A	#N/A
Lateolabrax_maculatus_GLEAN_10004792	black	2.38984	NIPAL2	NIPA-like domain containing 2	#N/A	#N/A	#N/A
Lateolabrax_maculatus_GLEAN_10001083	black	2.37787	PDZD7	PDZ domain containing	#N/A	#N/A	0.04
Lateolabrax_maculatus_GLEAN_10013932	black	2.37404	VARS2	valyl-tRNA synthetase 2, mitochondrial	#N/A	#N/A	#N/A
Lateolabrax_maculatus_GLEAN_10007691	black	2.35596	MEAF6	MYST Esa1-associated factor 6	#N/A	#N/A	#N/A
Lateolabrax_maculatus_GLEAN_10006557	black	2.33811	FRMD5	FERM domain containing 5	#N/A	#N/A	#N/A
Lateolabrax_maculatus_GLEAN_10015635	black	2.33419	SELP	Selectin	#N/A	#N/A	#N/A
Lateolabrax_maculatus_GLEAN_10003797	black	2.33124	NEK3	Belongs to the protein kinase superfamily	#N/A	#N/A	#N/A
Lateolabrax_maculatus_GLEAN_10007949	black	2.32756	IP6K2	Belongs to the inositol phosphokinase (IPK) family	#N/A	#N/A	#N/A
Lateolabrax_maculatus_GLEAN_10000546	black	2.32293	ATP1A3	ATPase, Na K transporting, alpha	#N/A	#N/A	#N/A
Lateolabrax_maculatus_GLEAN_10022781	black	2.30212	FUNDC1	FUN14 domain containing 1	#N/A	#N/A	#N/A
Lateolabrax_maculatus_GLEAN_10009869	black	2.29873	-	Cryptochrome	#N/A	#N/A	#N/A
Lateolabrax_maculatus_GLEAN_10006334	black	2.29016	CCBE1	Collagen and calcium binding EGF domains 1	#N/A	#N/A	#N/A
Lateolabrax_maculatus_GLEAN_10011165	black	2.28865	TTC25	Tetratricopeptide repeat domain 25	#N/A	#N/A	#N/A
Lateolabrax_maculatus_GLEAN_10012545	black	2.28638	CACNA1G	Voltage-sensitive calcium channels (VSCC) mediate the entry of calcium ions into excitable cells and are also involved in a variety of calcium-dependent processes, including muscle contraction, hormone or neurotransmitter release, gene expression, cell motility, cell division and cell death. This channel gives rise to T-type calcium currents. T-type calcium channels belong to the low-voltage acti…	#N/A	#N/A	#N/A
Lateolabrax_maculatus_GLEAN_10015499	black	2.28048	SCHIP1	Schwannomin-interacting protein 1 isoform X1	#N/A	#N/A	#N/A
Lateolabrax_maculatus_GLEAN_10009898	black	2.27975	SHISA2	Shisa family member 2	#N/A	#N/A	#N/A
Lateolabrax_maculatus_GLEAN_10010415	black	2.26958	HHATL	Belongs to the membrane-bound acyltransferase family	#N/A	#N/A	#N/A
Lateolabrax_maculatus_GLEAN_10006548	black	2.26449	PSTPIP1	Proline-serine-threonine phosphatase interacting protein	#N/A	#N/A	#N/A
Lateolabrax_maculatus_GLEAN_10023047	black	2.2604	NOM1	Nucleolar protein with MIF4G domain 1	#N/A	#N/A	#N/A
Lateolabrax_maculatus_GLEAN_10013644	black	2.25212	#N/A	#N/A	#N/A	#N/A	#N/A
Lateolabrax_maculatus_GLEAN_10022573	black	2.24754	-	Sodium channel, voltage-gated, type IV, beta b	#N/A	#N/A	#N/A
Lateolabrax_maculatus_GLEAN_10005242	black	2.23119	TMPRSS9	Transmembrane protease serine	#N/A	#N/A	#N/A
Lateolabrax_maculatus_GLEAN_10001383	black	2.21517	-	-	#N/A	#N/A	#N/A
Lateolabrax_maculatus_GLEAN_10010451	black	2.2069	SUGCT	succinyl-CoA glutarate-CoA transferase	#N/A	#N/A	#N/A
Lateolabrax_maculatus_GLEAN_10023175	black	2.19797	#N/A	#N/A	#N/A	#N/A	#N/A
Lateolabrax_maculatus_GLEAN_10001241	black	2.1969	CCDC181	Coiled-coil domain containing 181	#N/A	#N/A	#N/A
Lateolabrax_maculatus_GLEAN_10014466	black	2.19116	POU3F1	POU domain, class 3, transcription factor	#N/A	#N/A	#N/A
Lateolabrax_maculatus_GLEAN_10000761	black	2.17623	-	Immunoglobulin V-set domain	#N/A	#N/A	#N/A
Lateolabrax_maculatus_GLEAN_10022977	black	2.17495	#N/A	#N/A	#N/A	#N/A	#N/A
Lateolabrax_maculatus_GLEAN_10006638	black	2.17116	LRFN5	Leucine rich repeat and fibronectin type III domain containing 5	#N/A	#N/A	#N/A
Lateolabrax_maculatus_GLEAN_10022259	black	2.16674	-	-	#N/A	#N/A	#N/A
Lateolabrax_maculatus_GLEAN_10008105	black	2.16478	ANKRA2	Ankyrin repeat family A	#N/A	#N/A	#N/A
Lateolabrax_maculatus_GLEAN_10022563	black	2.156	MKRN2OS	MKRN2 opposite strand	#N/A	#N/A	#N/A
Lateolabrax_maculatus_GLEAN_10014665	black	2.15553	CycD	Cyclin, C-terminal domain	#N/A	#N/A	#N/A
Lateolabrax_maculatus_GLEAN_10005648	black	2.1526	MPV17L	Belongs to the peroxisomal membrane protein PXMP2 4 family	#N/A	#N/A	#N/A
Lateolabrax_maculatus_GLEAN_10007823	black	2.14682	RAB11B	constitutive secretory pathway	#N/A	#N/A	#N/A
Lateolabrax_maculatus_GLEAN_10018119	black	2.14421	STC2	Stanniocalcin 2a	#N/A	#N/A	#N/A
Lateolabrax_maculatus_GLEAN_10005578	black	2.14137	RSAD1	Radical S-adenosyl methionine domain-containing protein	#N/A	#N/A	#N/A
Lateolabrax_maculatus_GLEAN_10022229	black	2.13641	-	Reverse transcriptase (RNA-dependent DNA polymerase)	#N/A	#N/A	0.04
Lateolabrax_maculatus_GLEAN_10009828	black	2.13422	P2RX5	Purinergic receptor P2X, ligand-gated ion channel	#N/A	#N/A	#N/A
Lateolabrax_maculatus_GLEAN_10010060	black	2.11937	ETAA1	tumor-associated antigen 1	#N/A	#N/A	#N/A
Lateolabrax_maculatus_GLEAN_10002290	black	2.11452	mak	Male germ cell-associated kinase	#N/A	#N/A	#N/A
Lateolabrax_maculatus_GLEAN_10013593	black	2.111	ATP6V1C2	Subunit of the peripheral V1 complex of vacuolar ATPase. Subunit C is necessary for the assembly of the catalytic sector of the enzyme and is likely to have a specific function in its catalytic activity. V-ATPase is responsible for acidifying a variety of intracellular compartments in eukaryotic cells	#N/A	#N/A	#N/A
Lateolabrax_maculatus_GLEAN_10004317	black	2.11095	PWWP2A	PWWP domain containing 2A	#N/A	#N/A	#N/A
Lateolabrax_maculatus_GLEAN_10021220	black	2.10499	#N/A	#N/A	#N/A	#N/A	#N/A
Lateolabrax_maculatus_GLEAN_10019116	black	2.0999	-	Purpurin-like	#N/A	#N/A	#N/A
Lateolabrax_maculatus_GLEAN_10017441	black	2.08906	TTLL10	Tubulin tyrosine ligase-like family, member 10	#N/A	#N/A	#N/A
Lateolabrax_maculatus_GLEAN_10021259	black	2.08856	-	-	#N/A	#N/A	#N/A
Lateolabrax_maculatus_GLEAN_10009771	black	2.08575	ASTN1	Astrotactin 1	#N/A	#N/A	#N/A
Lateolabrax_maculatus_GLEAN_10018652	black	2.07848	SYN2	Synapsin II	#N/A	#N/A	0.04
Lateolabrax_maculatus_GLEAN_10013120	black	2.05799	ASMT	Acetylserotonin O-methyltransferase 2	#N/A	#N/A	#N/A
Lateolabrax_maculatus_GLEAN_10021507	black	2.05266	-	Transposase	#N/A	#N/A	#N/A
Lateolabrax_maculatus_GLEAN_10013591	black	2.02068	MOCS1	Molybdenum cofactor	#N/A	#N/A	#N/A
Lateolabrax_maculatus_GLEAN_10021639	black	2.00536	-	-	#N/A	#N/A	#N/A
Lateolabrax_maculatus_GLEAN_10020579	black	2.00318	-	Domain of unknown function (DUF4371)	#N/A	#N/A	#N/A
Lateolabrax_maculatus_GLEAN_10020443	black	2.00023	FAM150A	Family with sequence similarity 150, member A	#N/A	#N/A	#N/A
Lateolabrax_maculatus_GLEAN_10001935	black	1.98629	VPS33B	Vacuolar protein	#N/A	#N/A	#N/A
Lateolabrax_maculatus_GLEAN_10013495	black	1.97541	ATPAF2	ATP synthase mitochondrial F1 complex assembly factor	#N/A	#N/A	#N/A
Lateolabrax_maculatus_GLEAN_10022885	black	1.95828	ATP1A3	ATPase, Na K transporting, alpha	#N/A	#N/A	#N/A
Lateolabrax_maculatus_GLEAN_10004492	black	1.95346	C5orf22	Chromosome 5 open reading frame 22	#N/A	#N/A	#N/A
Lateolabrax_maculatus_GLEAN_10010708	black	1.93881	RORA	RAR-related orphan receptor A, paralog	#N/A	#N/A	#N/A
Lateolabrax_maculatus_GLEAN_10008051	black	1.9344	CPLX2	Complexin 2	#N/A	#N/A	#N/A
Lateolabrax_maculatus_GLEAN_10022148	black	1.91621	NLRP12	NLRC3-like	#N/A	#N/A	#N/A
Lateolabrax_maculatus_GLEAN_10015143	black	1.91414	SPTBN5	Spectrin beta	#N/A	#N/A	#N/A
Lateolabrax_maculatus_GLEAN_10004191	black	1.9076	PPP1R1B	Protein phosphatase 1 regulatory	#N/A	#N/A	#N/A
Lateolabrax_maculatus_GLEAN_10021289	black	1.8894	TRIM7	E3 ubiquitin-protein ligase	#N/A	#N/A	#N/A
Lateolabrax_maculatus_GLEAN_10001189	black	1.8813	ZBTB49	Zinc finger and BTB	#N/A	#N/A	#N/A
Lateolabrax_maculatus_GLEAN_10007253	black	1.88116	GSE1	Gse1 coiled-coil protein	#N/A	#N/A	0.04
Lateolabrax_maculatus_GLEAN_10011303	black	1.87335	UBAP2	Ubiquitin associated protein 2	#N/A	#N/A	#N/A
Lateolabrax_maculatus_GLEAN_10015612	black	1.87009	LHX8	LIM homeobox	#N/A	#N/A	#N/A
Lateolabrax_maculatus_GLEAN_10012773	black	1.85863	-	Belongs to the G-protein coupled receptor 1 family	#N/A	#N/A	#N/A
Lateolabrax_maculatus_GLEAN_10004652	black	1.84163	CMTM8	CKLF-like MARVEL transmembrane	#N/A	#N/A	#N/A
Lateolabrax_maculatus_GLEAN_10016544	black	1.84116	dhh	Intercellular signal essential for a variety of patterning events during development	#N/A	#N/A	#N/A
Lateolabrax_maculatus_GLEAN_10005490	black	1.84102	FAM114A2	Family with sequence similarity 114, member A2	#N/A	#N/A	#N/A
Lateolabrax_maculatus_GLEAN_10010826	black	1.8267	wisp2	WNT1 inducible signaling pathway protein 2	#N/A	#N/A	0.04
Lateolabrax_maculatus_GLEAN_10019451	black	1.82601	-	Immunoglobulin C-Type	#N/A	#N/A	#N/A
Lateolabrax_maculatus_GLEAN_10011847	black	1.82454	NRTN	Neurturin	#N/A	#N/A	#N/A
Lateolabrax_maculatus_GLEAN_10014960	black	1.81241	TSPAN12	Tetraspanin 12	#N/A	#N/A	#N/A
Lateolabrax_maculatus_GLEAN_10013653	black	1.80827	filip1l	protein phosphatase 2A binding	#N/A	#N/A	#N/A
Lateolabrax_maculatus_GLEAN_10022065	black	1.78297	KLHL33	Kelch-like family member 33	#N/A	#N/A	#N/A
Lateolabrax_maculatus_GLEAN_10007818	black	1.77971	BHLHE40	Basic helix-loop-helix family, member e40	#N/A	#N/A	#N/A
Lateolabrax_maculatus_GLEAN_10005892	black	1.75156	ART1	NAD(P)+-protein-arginine ADP-ribosyltransferase activity	#N/A	#N/A	#N/A
Lateolabrax_maculatus_GLEAN_10010408	black	1.74994	-	E3 ubiquitin ISG15 ligase TRIM25-like	#N/A	#N/A	#N/A
Lateolabrax_maculatus_GLEAN_10010646	black	1.71667	HIBADH	3-hydroxyisobutyrate dehydrogenase	#N/A	#N/A	#N/A
Lateolabrax_maculatus_GLEAN_10018922	black	1.70874	PLEKHG7	Pleckstrin homology domain containing, family G (with RhoGef domain) member 7	#N/A	#N/A	#N/A
Lateolabrax_maculatus_GLEAN_10019819	black	1.70282	#N/A	#N/A	#N/A	#N/A	#N/A
Lateolabrax_maculatus_GLEAN_10007418	black	1.68652	TMEM229B	Transmembrane protein 229b	#N/A	#N/A	0.04
Lateolabrax_maculatus_GLEAN_10013526	black	1.683	SLC16A6	Solute carrier family 16	#N/A	#N/A	#N/A
Lateolabrax_maculatus_GLEAN_10016086	black	1.66332	KIAA1147	Si ch211-238n5.4	#N/A	#N/A	#N/A
Lateolabrax_maculatus_GLEAN_10000753	black	1.65929	-	Apolipoprotein L	#N/A	#N/A	#N/A
Lateolabrax_maculatus_GLEAN_10002753	black	1.65337	GPC6	Cell surface proteoglycan that bears heparan sulfate	#N/A	#N/A	#N/A
Lateolabrax_maculatus_GLEAN_10005834	black	1.64227	HSPBAP1	Hspb associated protein 1	#N/A	#N/A	#N/A
Lateolabrax_maculatus_GLEAN_10013453	black	1.63698	RANGAP1	RAN GTPase activating protein	#N/A	#N/A	#N/A
Lateolabrax_maculatus_GLEAN_10004951	black	1.63574	TMUB2	Transmembrane and ubiquitin-like domain containing 2	#N/A	#N/A	#N/A
Lateolabrax_maculatus_GLEAN_10005197	black	1.63317	TDRD15	Tudor domain-containing protein	#N/A	#N/A	#N/A
Lateolabrax_maculatus_GLEAN_10002046	black	1.60463	CDR2	Cerebellar degeneration-related protein	#N/A	#N/A	#N/A
Lateolabrax_maculatus_GLEAN_10023174	black	1.60159	-	Myb/SANT-like DNA-binding domain	#N/A	#N/A	#N/A
Lateolabrax_maculatus_GLEAN_10011954	black	1.59817	KCNQ4	Potassium voltage-gated channel, KQT-like subfamily, member 4	#N/A	#N/A	#N/A
Lateolabrax_maculatus_GLEAN_10000436	black	1.58034	SLC25A38	Mitochondrial carrier required during erythropoiesis. Probably involved in the biosynthesis of heme, possibly by facilitating 5-aminolevulinate (ALA) production. May act by importing glycine into mitochondria or by exchanging glycine for ALA across the mitochondrial inner membrane	#N/A	#N/A	#N/A
Lateolabrax_maculatus_GLEAN_10005565	black	1.56726	ASF1B	ASF1 anti-silencing function 1 homolog Ba (S. cerevisiae)	#N/A	#N/A	#N/A
Lateolabrax_maculatus_GLEAN_10000207	black	1.54428	SESTD1	SEC14 and spectrin domains 1	#N/A	#N/A	#N/A
Lateolabrax_maculatus_GLEAN_10021010	black	1.5414	-	Transposase	#N/A	#N/A	#N/A
Lateolabrax_maculatus_GLEAN_10000172	black	1.5117	-	-	#N/A	#N/A	#N/A
Lateolabrax_maculatus_GLEAN_10000938	black	1.50852	-	-	#N/A	#N/A	#N/A
Lateolabrax_maculatus_GLEAN_10017202	black	1.5085	C21orf62	Chromosome 21 open reading frame 62	#N/A	#N/A	#N/A
Lateolabrax_maculatus_GLEAN_10013880	black	1.50514	PIGQ	Phosphatidylinositol glycan, class Q	#N/A	#N/A	#N/A
Lateolabrax_maculatus_GLEAN_10011465	black	1.48996	ZNF207	Zinc finger protein 207	#N/A	#N/A	#N/A
Lateolabrax_maculatus_GLEAN_10018309	black	1.48579	EFCAB14	EF-hand calcium binding domain 14	#N/A	#N/A	#N/A
Lateolabrax_maculatus_GLEAN_10003987	black	1.473	SLC9A3R1	Scaffold protein that connects plasma membrane proteins with members of the ezrin moesin radixin family and thereby helps to link them to the actin cytoskeleton and to regulate their surface expression	#N/A	#N/A	#N/A
Lateolabrax_maculatus_GLEAN_10002145	black	1.47186	DSTYK	Dual serine threonine and tyrosine protein	#N/A	#N/A	#N/A
Lateolabrax_maculatus_GLEAN_10002592	black	1.46674	EEF2	Elongation factor	#N/A	#N/A	#N/A
Lateolabrax_maculatus_GLEAN_10016662	black	1.46285	BAG3	BCL2-associated athanogene 3	#N/A	#N/A	#N/A
Lateolabrax_maculatus_GLEAN_10003213	black	1.43838	TTC18	Cilia and flagella associated protein 70	#N/A	#N/A	#N/A
Lateolabrax_maculatus_GLEAN_10022582	black	1.43044	FMO5	Dimethylaniline monooxygenase N-oxide-forming	#N/A	#N/A	#N/A
Lateolabrax_maculatus_GLEAN_10018436	black	1.41881	RASSF2	Ras association (RalGDS AF-6) domain family	#N/A	#N/A	#N/A
Lateolabrax_maculatus_GLEAN_10005086	black	1.36904	TPBG	Trophoblast glycoprotein	#N/A	#N/A	#N/A
Lateolabrax_maculatus_GLEAN_10022667	black	1.36244	C17orf70	Chromosome 17 open reading frame 70	#N/A	#N/A	#N/A
Lateolabrax_maculatus_GLEAN_10005956	black	1.35915	-	Belongs to the G-protein coupled receptor 1 family	#N/A	#N/A	#N/A
Lateolabrax_maculatus_GLEAN_10002603	black	1.34989	SOX18	SRY (sex determining region Y)-box 18	#N/A	#N/A	#N/A
Lateolabrax_maculatus_GLEAN_10010180	black	1.31149	VPS72	Vacuolar protein sorting 72 homolog (S. cerevisiae)	#N/A	#N/A	#N/A
Lateolabrax_maculatus_GLEAN_10008163	black	1.23756	-	adhesion molecule, interacts with CXADR antigen 1	#N/A	#N/A	#N/A
Lateolabrax_maculatus_GLEAN_10013795	black	1.1532	FUBP3	Far upstream element (FUSE) binding protein 3	#N/A	#N/A	#N/A
Lateolabrax_maculatus_GLEAN_10005629	black	1.14726	rnf130	E3 ubiquitin-protein ligase	#N/A	#N/A	#N/A
Lateolabrax_maculatus_GLEAN_10000069	black	0.972188	RAB11FIP4	RAB11 family interacting protein 4 (class II)	#N/A	#N/A	#N/A
Lateolabrax_maculatus_GLEAN_10014067	black	0.929403	ADO	2-aminoethanethiol (cysteamine) dioxygenase a	#N/A	#N/A	#N/A
Lateolabrax_maculatus_GLEAN_10014500	black	0.832431	CAAP1	Caspase activity and apoptosis inhibitor 1	#N/A	#N/A	#N/A
Lateolabrax_maculatus_GLEAN_10002872	blue	871.615	-	Domain of unknown function (DUF3504)	#N/A	#N/A	#N/A
Lateolabrax_maculatus_GLEAN_10013637	blue	866.865	RALGAPA1	Ral GTPase activating protein, alpha subunit 1 (catalytic)	#N/A	#N/A	#N/A
Lateolabrax_maculatus_GLEAN_10018923	blue	862.719	ITPR2	receptor type 2	#N/A	#N/A	#N/A
Lateolabrax_maculatus_GLEAN_10011378	blue	861.658	KIAA1217	Sickle tail protein homolog	#N/A	#N/A	#N/A
Lateolabrax_maculatus_GLEAN_10014005	blue	847.787	FAT1	FAT tumor suppressor homolog 1a	#N/A	#N/A	#N/A
Lateolabrax_maculatus_GLEAN_10008516	blue	838.429	SPTBN2	Spectrin, beta, non-erythrocytic 2	#N/A	#N/A	#N/A
Lateolabrax_maculatus_GLEAN_10007988	blue	837.942	PLXNB2	plexin-B2-like	#N/A	#N/A	#N/A
Lateolabrax_maculatus_GLEAN_10009717	blue	831.631	2022-09-12	Belongs to the TRAFAC class TrmE-Era-EngA-EngB-Septin- like GTPase superfamily. Septin GTPase family	#N/A	#N/A	#N/A
Lateolabrax_maculatus_GLEAN_10012435	blue	828.488	PAM	Peptidylglycine alpha-amidating monooxygenase	#N/A	#N/A	#N/A
Lateolabrax_maculatus_GLEAN_10019144	blue	823.974	DOCK5	dedicator of cytokinesis	#N/A	#N/A	#N/A
Lateolabrax_maculatus_GLEAN_10014757	blue	823.022	-	Belongs to the TRAFAC class myosin-kinesin ATPase superfamily. Myosin family	#N/A	#N/A	#N/A
Lateolabrax_maculatus_GLEAN_10005215	blue	823.013	NOTCH3	Notch homolog	#N/A	#N/A	#N/A
Lateolabrax_maculatus_GLEAN_10015307	blue	816.106	lcorl	nuclear receptor corepressor-like	#N/A	#N/A	#N/A
Lateolabrax_maculatus_GLEAN_10017883	blue	814.293	EPB41L1	Erythrocyte membrane protein band 4.1-like 1	#N/A	#N/A	#N/A
Lateolabrax_maculatus_GLEAN_10016534	blue	812.439	LRP1	lipoprotein receptor-related protein	#N/A	#N/A	#N/A
Lateolabrax_maculatus_GLEAN_10007241	blue	808.815	PPFIA1	Protein tyrosine phosphatase, receptor type, f polypeptide (PTPRF), interacting protein (liprin), alpha 1	#N/A	#N/A	#N/A
Lateolabrax_maculatus_GLEAN_10003915	blue	807.13	C10orf12	Chromosome 10 open reading frame 12	#N/A	#N/A	#N/A
Lateolabrax_maculatus_GLEAN_10018880	blue	805.71	ERC1	ELKS RAB6-interacting CAST family member	#N/A	#N/A	#N/A
Lateolabrax_maculatus_GLEAN_10013555	blue	805.602	HIPK3	lens induction in camera-type eye	#N/A	#N/A	#N/A
Lateolabrax_maculatus_GLEAN_10011703	blue	805.58	STAG2	Stromal antigen	#N/A	#N/A	#N/A
Lateolabrax_maculatus_GLEAN_10003034	blue	805.554	ANKRD12	ankyrin repeat	#N/A	#N/A	#N/A
Lateolabrax_maculatus_GLEAN_10006861	blue	805.224	ZNF518B	Zinc finger protein 518B	#N/A	#N/A	#N/A
Lateolabrax_maculatus_GLEAN_10005995	blue	805.007	PLEKHA6	family A, member	#N/A	#N/A	#N/A
Lateolabrax_maculatus_GLEAN_10003059	blue	804.669	KMT2B	histone methyltransferase activity (H3-K4 specific)	#N/A	#N/A	#N/A
Lateolabrax_maculatus_GLEAN_10004824	blue	803.456	UTRN	May play a role in anchoring the cytoskeleton to the plasma membrane	#N/A	#N/A	#N/A
Lateolabrax_maculatus_GLEAN_10015694	blue	802.372	CEP350	Centrosomal protein 350kDa	#N/A	#N/A	#N/A
Lateolabrax_maculatus_GLEAN_10002921	blue	801.505	-	Homeodomain	#N/A	#N/A	#N/A
Lateolabrax_maculatus_GLEAN_10005183	blue	800.416	ZNF654	Zinc finger protein 654	#N/A	#N/A	#N/A
Lateolabrax_maculatus_GLEAN_10006829	blue	799.565	-	Myb/SANT-like DNA-binding domain	#N/A	#N/A	#N/A
Lateolabrax_maculatus_GLEAN_10005298	blue	799.058	MYCBP2	MYC binding protein 2	#N/A	#N/A	#N/A
Lateolabrax_maculatus_GLEAN_10003259	blue	795.878	SYNE2	Spectrin repeat containing, nuclear envelope 2a	#N/A	#N/A	0.04
Lateolabrax_maculatus_GLEAN_10018077	blue	795.163	arhgef9	guanine nucleotide exchange factor	#N/A	#N/A	#N/A
Lateolabrax_maculatus_GLEAN_10003298	blue	793.561	BAZ2B	Bromodomain adjacent to zinc finger domain	#N/A	#N/A	#N/A
Lateolabrax_maculatus_GLEAN_10001599	blue	790.78	ash1	Ash1 (absent, small, or homeotic)-like (Drosophila)	#N/A	#N/A	#N/A
Lateolabrax_maculatus_GLEAN_10015561	blue	788.825	HNRNPUL1	Heterogeneous nuclear ribonucleoprotein U-like	#N/A	#N/A	#N/A
Lateolabrax_maculatus_GLEAN_10007664	blue	788.457	cgh-1	helicase	#N/A	#N/A	#N/A
Lateolabrax_maculatus_GLEAN_10006588	blue	788.275	FRY	furry homolog	#N/A	#N/A	#N/A
Lateolabrax_maculatus_GLEAN_10018136	blue	787.936	SYNPO	Synaptopodin	#N/A	#N/A	#N/A
Lateolabrax_maculatus_GLEAN_10014639	blue	784.97	ckap5	Cytoskeleton associated protein 5	#N/A	#N/A	#N/A
Lateolabrax_maculatus_GLEAN_10019085	blue	783.2	TET3	Methylcytosine dioxygenase	#N/A	#N/A	#N/A
Lateolabrax_maculatus_GLEAN_10001301	blue	782.727	NIPBL	Nipped-b homolog	#N/A	#N/A	#N/A
Lateolabrax_maculatus_GLEAN_10003603	blue	782.141	TNRC18	Trinucleotide repeat containing 18	#N/A	#N/A	#N/A
Lateolabrax_maculatus_GLEAN_10002119	blue	781.909	ADAM10	constitutive protein ectodomain proteolysis	#N/A	#N/A	#N/A
Lateolabrax_maculatus_GLEAN_10015153	blue	781.425	ARHGAP5	Rho GTPase activating protein 5	#N/A	#N/A	#N/A
Lateolabrax_maculatus_GLEAN_10017471	blue	779.767	CSDE1	Cold shock domain containing E1	#N/A	#N/A	#N/A
Lateolabrax_maculatus_GLEAN_10009565	blue	779.425	TMEM131	Transmembrane protein 131	#N/A	#N/A	#N/A
Lateolabrax_maculatus_GLEAN_10010400	blue	778.5	ACIN1	apoptotic chromatin condensation inducer	#N/A	#N/A	#N/A
Lateolabrax_maculatus_GLEAN_10018459	blue	777.382	LIFR	Leukemia inhibitory factor	#N/A	#N/A	#N/A
Lateolabrax_maculatus_GLEAN_10012734	blue	777.319	MYO1B	Belongs to the TRAFAC class myosin-kinesin ATPase superfamily. Myosin family	#N/A	#N/A	#N/A
Lateolabrax_maculatus_GLEAN_10011489	blue	776.943	TRIO	neurotransmitter receptor localization to postsynaptic specialization membrane	#N/A	#N/A	#N/A
Lateolabrax_maculatus_GLEAN_10002510	blue	776.722	TJP1	Guanylate kinase homologues.	#N/A	#N/A	#N/A
Lateolabrax_maculatus_GLEAN_10008987	blue	776.386	ZBTB4	Zinc finger and BTB domain containing 4	#N/A	#N/A	#N/A
Lateolabrax_maculatus_GLEAN_10015660	blue	774.762	AP3D1	Adaptor-related protein complex 3, delta 1 subunit	#N/A	#N/A	#N/A
Lateolabrax_maculatus_GLEAN_10004522	blue	773.95	MYO1D	Belongs to the TRAFAC class myosin-kinesin ATPase superfamily. Myosin family	#N/A	#N/A	#N/A
Lateolabrax_maculatus_GLEAN_10004842	blue	773.53	ash1l	Histone-lysine N-methyltransferase ASH1L	#N/A	#N/A	#N/A
Lateolabrax_maculatus_GLEAN_10000865	blue	773.143	FNDC3B	fibronectin type III	#N/A	#N/A	#N/A
Lateolabrax_maculatus_GLEAN_10005945	blue	772.657	dab2ip	DAB2 interacting protein	#N/A	#N/A	#N/A
Lateolabrax_maculatus_GLEAN_10005247	blue	772.107	MYO9B	Myosin. Large ATPases.	#N/A	#N/A	#N/A
Lateolabrax_maculatus_GLEAN_10003888	blue	771.507	BPTF	domain in different transcription and chromosome remodeling factors	#N/A	#N/A	#N/A
Lateolabrax_maculatus_GLEAN_10004866	blue	770.738	myh9	Belongs to the TRAFAC class myosin-kinesin ATPase superfamily. Myosin family	#N/A	#N/A	#N/A
Lateolabrax_maculatus_GLEAN_10008081	blue	770.723	MAST4	Microtubule associated serine threonine kinase family member 4	#N/A	#N/A	#N/A
Lateolabrax_maculatus_GLEAN_10017077	blue	770.665	LUZP1	Leucine zipper protein 1	#N/A	#N/A	0.04
Lateolabrax_maculatus_GLEAN_10018921	blue	770.108	EEA1	Early endosome antigen 1	#N/A	#N/A	#N/A
Lateolabrax_maculatus_GLEAN_10018575	blue	769.481	NIPBL	Nipped-b homolog	#N/A	#N/A	#N/A
Lateolabrax_maculatus_GLEAN_10017374	blue	768.174	UBR4	Ubiquitin protein ligase E3 component n-recognin 4	#N/A	#N/A	#N/A
Lateolabrax_maculatus_GLEAN_10005939	blue	767.903	SHROOM1	Shroom family member 1	#N/A	#N/A	#N/A
Lateolabrax_maculatus_GLEAN_10008307	blue	767.347	PARD3	partitioning defective 3 homolog	#N/A	#N/A	#N/A
Lateolabrax_maculatus_GLEAN_10006986	blue	766.938	GOLIM4	Golgi integral membrane protein	#N/A	#N/A	#N/A
Lateolabrax_maculatus_GLEAN_10014507	blue	765.659	PTPRD	Protein tyrosine phosphatase, receptor type D	#N/A	#N/A	0.04
Lateolabrax_maculatus_GLEAN_10015067	blue	764.897	-	Lysine (K)-specific demethylase 6B, b	#N/A	#N/A	#N/A
Lateolabrax_maculatus_GLEAN_10007562	blue	764.399	PRR12	Domain of unknown function (DUF4211)	#N/A	#N/A	#N/A
Lateolabrax_maculatus_GLEAN_10000901	blue	763.541	ZNF638	RNA splicing	#N/A	#N/A	#N/A
Lateolabrax_maculatus_GLEAN_10013616	blue	759.067	ROCK2	Rho-associated, coiled-coil containing protein kinase 2a	#N/A	#N/A	#N/A
Lateolabrax_maculatus_GLEAN_10001302	blue	758.959	UHRF2	Ubiquitin-like with PHD and ring finger domains 2, E3 ubiquitin protein ligase	#N/A	#N/A	#N/A
Lateolabrax_maculatus_GLEAN_10011153	blue	758.268	ATP6V0A1	Essential component of the vacuolar proton pump (V- ATPase), a multimeric enzyme that catalyzes the translocation of protons across the membranes. Required for assembly and activity of the V-ATPase	#N/A	#N/A	#N/A
Lateolabrax_maculatus_GLEAN_10016546	blue	758.254	KMT2D	Lysine (K)-specific methyltransferase 2D	#N/A	#N/A	#N/A
Lateolabrax_maculatus_GLEAN_10013346	blue	757.8	PARP10	Ubiquitin interaction motif	#N/A	#N/A	#N/A
Lateolabrax_maculatus_GLEAN_10015852	blue	756.496	KDM5C	Lysine (K)-specific demethylase 5C	#N/A	#N/A	#N/A
Lateolabrax_maculatus_GLEAN_10009086	blue	756.416	MAP4K4	Mitogen-activated protein kinase kinase kinase kinase	#N/A	#N/A	#N/A
Lateolabrax_maculatus_GLEAN_10007015	blue	755.324	SETD1A	SET domain containing 1A	#N/A	#N/A	#N/A
Lateolabrax_maculatus_GLEAN_10004806	blue	755.122	BRD4	Bromodomain-containing protein 4-like isoform X1	#N/A	#N/A	#N/A
Lateolabrax_maculatus_GLEAN_10008466	blue	755.08	TCF3	Transcription factor	#N/A	#N/A	#N/A
Lateolabrax_maculatus_GLEAN_10017432	blue	754.95	SPEN	Spen homolog, transcriptional regulator (Drosophila)	#N/A	#N/A	#N/A
Lateolabrax_maculatus_GLEAN_10010994	blue	754.765	COL4A4	extracellular matrix structural constituent	#N/A	#N/A	0.04
Lateolabrax_maculatus_GLEAN_10018792	blue	754.714	CHD2	Chromodomain helicase DNA binding protein 2	#N/A	#N/A	#N/A
Lateolabrax_maculatus_GLEAN_10014072	blue	754.024	JMJD1C	Jumonji domain containing 1C	#N/A	#N/A	#N/A
Lateolabrax_maculatus_GLEAN_10014935	blue	753.277	CALD1	Caldesmon 1 like	#N/A	#N/A	#N/A
Lateolabrax_maculatus_GLEAN_10006264	blue	752.343	SUPT6H	Transcription elongation factor that enhances transcription elongation by RNA polymerase II (RNAPII)	#N/A	#N/A	#N/A
Lateolabrax_maculatus_GLEAN_10012998	blue	751.894	CEMIP	Cell migration inducing protein, hyaluronan binding	#N/A	#N/A	#N/A
Lateolabrax_maculatus_GLEAN_10015244	blue	751.233	DOCK7	dedicator of cytokinesis	#N/A	#N/A	#N/A
Lateolabrax_maculatus_GLEAN_10008215	blue	751.097	ATP2B1	negative regulation of citrulline biosynthetic process	#N/A	#N/A	#N/A
Lateolabrax_maculatus_GLEAN_10015452	blue	750.15	PPP1R37	Protein phosphatase 1, regulatory subunit	#N/A	#N/A	#N/A
Lateolabrax_maculatus_GLEAN_10018330	blue	750.148	RB1CC1	RB1-inducible coiled-coil	#N/A	#N/A	#N/A
Lateolabrax_maculatus_GLEAN_10019123	blue	748.372	KIAA1671	Si ch73-138n13.1	#N/A	#N/A	#N/A
Lateolabrax_maculatus_GLEAN_10009067	blue	746.908	ATP11C	Belongs to the cation transport ATPase (P-type) (TC 3.A.3) family. Type IV subfamily	#N/A	#N/A	#N/A
Lateolabrax_maculatus_GLEAN_10018261	blue	745.361	KMT2C	Histone-lysine N-methyltransferase	#N/A	#N/A	#N/A
Lateolabrax_maculatus_GLEAN_10007277	blue	743.097	GOLGB1	Golgi autoantigen, golgin subfamily b, macrogolgin (with transmembrane signal), 1	#N/A	#N/A	#N/A
Lateolabrax_maculatus_GLEAN_10012405	blue	742.395	CHD1	Chromodomain helicase DNA binding protein 1	#N/A	#N/A	#N/A
Lateolabrax_maculatus_GLEAN_10012636	blue	741.073	CHD6	Chromodomain helicase DNA binding protein 6	#N/A	#N/A	#N/A
Lateolabrax_maculatus_GLEAN_10011897	blue	740.43	FNIP1	Folliculin interacting protein 1	#N/A	#N/A	#N/A
Lateolabrax_maculatus_GLEAN_10015728	blue	740.187	CLMN	Calmin (calponin-like, transmembrane)	#N/A	#N/A	#N/A
Lateolabrax_maculatus_GLEAN_10000933	blue	739.177	KIAA0232	Zgc 158564	#N/A	#N/A	#N/A
Lateolabrax_maculatus_GLEAN_10012820	blue	738.688	KIAA0100	Si ch211-259g3.4	#N/A	#N/A	#N/A
Lateolabrax_maculatus_GLEAN_10009709	blue	738.682	ABCC1	ATP-binding cassette, sub-family C (CFTR MRP), member 1	#N/A	#N/A	#N/A
Lateolabrax_maculatus_GLEAN_10012524	blue	737.016	SPAG9	Sperm associated antigen	#N/A	#N/A	#N/A
Lateolabrax_maculatus_GLEAN_10015777	blue	736.738	PICALM	clathrin assembly	#N/A	#N/A	#N/A
Lateolabrax_maculatus_GLEAN_10002305	blue	735.978	RABGAP1	RAB GTPase activating protein 1	#N/A	#N/A	#N/A
Lateolabrax_maculatus_GLEAN_10001192	blue	735.091	RSF1	Remodeling and spacing factor	#N/A	#N/A	#N/A
Lateolabrax_maculatus_GLEAN_10008862	blue	734.755	TRIP12	Thyroid hormone receptor interactor 12	#N/A	#N/A	#N/A
Lateolabrax_maculatus_GLEAN_10004146	blue	733.024	ITSN2	Intersectin	#N/A	#N/A	#N/A
Lateolabrax_maculatus_GLEAN_10017763	blue	732.199	PHF3	PHD finger protein 3	#N/A	#N/A	#N/A
Lateolabrax_maculatus_GLEAN_10011604	blue	731.404	ITGA1	integrin	#N/A	#N/A	#N/A
Lateolabrax_maculatus_GLEAN_10011694	blue	731.051	TAF1	TAF1 RNA polymerase II, TATA box binding protein (TBP)-associated factor	#N/A	#N/A	#N/A
Lateolabrax_maculatus_GLEAN_10017023	blue	730.715	PCNT	Pericentrin	#N/A	#N/A	#N/A
Lateolabrax_maculatus_GLEAN_10015126	blue	730.687	mga	MAX gene associated a	#N/A	#N/A	#N/A
Lateolabrax_maculatus_GLEAN_10003947	blue	730.411	ANK3	Ankyrin 3b	#N/A	#N/A	#N/A
Lateolabrax_maculatus_GLEAN_10012320	blue	730.071	DOCK6	Belongs to the DOCK family	#N/A	#N/A	#N/A
Lateolabrax_maculatus_GLEAN_10006111	blue	729.783	DOCK1	dedicator of cytokinesis	#N/A	#N/A	#N/A
Lateolabrax_maculatus_GLEAN_10014504	blue	729.634	MPDZ	Multiple PDZ domain protein	#N/A	#N/A	0.04
Lateolabrax_maculatus_GLEAN_10005291	blue	729.219	TBC1D4	TBC1 domain family, member 4	#N/A	#N/A	#N/A
Lateolabrax_maculatus_GLEAN_10009156	blue	726.434	CACNA2D1	Calcium channel, voltage-dependent, alpha 2 delta subunit 1a	#N/A	#N/A	0.04
Lateolabrax_maculatus_GLEAN_10012374	blue	725.367	GPATCH8	G patch domain containing 8	#N/A	#N/A	#N/A
Lateolabrax_maculatus_GLEAN_10004690	blue	724.497	CHD3	Chromodomain helicase DNA binding protein 3	#N/A	#N/A	#N/A
Lateolabrax_maculatus_GLEAN_10005505	blue	723.436	FRY	furry homolog	#N/A	#N/A	#N/A
Lateolabrax_maculatus_GLEAN_10011401	blue	722.06	PXDN	Peroxidasin homolog	#N/A	#N/A	#N/A
Lateolabrax_maculatus_GLEAN_10001319	blue	721.961	SYNE2	nuclear migration along microfilament	#N/A	#N/A	0.04
Lateolabrax_maculatus_GLEAN_10016177	blue	721.883	PHRF1	PHD and RING finger	#N/A	#N/A	#N/A
Lateolabrax_maculatus_GLEAN_10018684	blue	721.42	PRDM2	PR domain containing 2, with ZNF domain b	#N/A	#N/A	#N/A
Lateolabrax_maculatus_GLEAN_10010008	blue	721.244	CD68	CD68 molecule	#N/A	#N/A	#N/A
Lateolabrax_maculatus_GLEAN_10012115	blue	720.903	HECTD4	HECT domain containing E3 ubiquitin protein ligase 4	#N/A	#N/A	#N/A
Lateolabrax_maculatus_GLEAN_10014657	blue	720.901	FAM65A	Family with sequence similarity 65 member A	#N/A	#N/A	#N/A
Lateolabrax_maculatus_GLEAN_10010239	blue	720.37	KDM4C	demethylase	#N/A	#N/A	#N/A
Lateolabrax_maculatus_GLEAN_10008680	blue	720.079	PDGFRA	Platelet-derived growth factor receptor	#N/A	#N/A	#N/A
Lateolabrax_maculatus_GLEAN_10012694	blue	719.254	LPCAT1	Lysophosphatidylcholine acyltransferase	#N/A	#N/A	#N/A
Lateolabrax_maculatus_GLEAN_10002987	blue	719.127	ARHGAP23	Rho GTPase activating protein	#N/A	#N/A	#N/A
Lateolabrax_maculatus_GLEAN_10007749	blue	718.888	CYTH1	Cytohesin 1a	#N/A	#N/A	#N/A
Lateolabrax_maculatus_GLEAN_10010206	blue	717.731	MYLK	myosin light chain kinase	#N/A	#N/A	#N/A
Lateolabrax_maculatus_GLEAN_10009030	blue	717.472	CENPF	centromere protein	#N/A	#N/A	#N/A
Lateolabrax_maculatus_GLEAN_10018329	blue	716.086	RB1CC1	RB1-inducible coiled-coil	#N/A	#N/A	#N/A
Lateolabrax_maculatus_GLEAN_10006193	blue	715.945	PLEC	Plectin a	#N/A	#N/A	#N/A
Lateolabrax_maculatus_GLEAN_10007132	blue	715.584	STRC	Stereocilin-like	#N/A	#N/A	#N/A
Lateolabrax_maculatus_GLEAN_10011857	blue	714.873	VAV3	guanine nucleotide exchange factor	#N/A	#N/A	#N/A
Lateolabrax_maculatus_GLEAN_10006577	blue	714.873	FREM2	Extracellular matrix protein	#N/A	#N/A	#N/A
Lateolabrax_maculatus_GLEAN_10022949	blue	714.584	SMTN	Smoothelin b	#N/A	#N/A	#N/A
Lateolabrax_maculatus_GLEAN_10009773	blue	714.546	XRN1	5'-3' exoribonuclease 1	#N/A	#N/A	#N/A
Lateolabrax_maculatus_GLEAN_10005816	blue	714.525	DOCK1	dedicator of cytokinesis	#N/A	#N/A	#N/A
Lateolabrax_maculatus_GLEAN_10016102	blue	714.243	MICAL3	Microtubule associated monooxygenase, calponin and LIM domain containing	#N/A	#N/A	#N/A
Lateolabrax_maculatus_GLEAN_10005602	blue	714.146	BRWD1	Bromodomain and WD repeat domain containing 1	#N/A	#N/A	#N/A
Lateolabrax_maculatus_GLEAN_10011653	blue	713.764	asph	Aspartyl beta-hydroxylase N-terminal region	#N/A	#N/A	#N/A
Lateolabrax_maculatus_GLEAN_10012911	blue	713.594	PIK3CA	3-kinase, catalytic subunit alpha	#N/A	#N/A	#N/A
Lateolabrax_maculatus_GLEAN_10016692	blue	713	FAM83H	Family with sequence similarity 83, member H	#N/A	#N/A	#N/A
Lateolabrax_maculatus_GLEAN_10014907	blue	712.902	BRD1	Bromodomain containing 1a	#N/A	#N/A	#N/A
Lateolabrax_maculatus_GLEAN_10011677	blue	711.612	PLD2	Phospholipase D2	#N/A	#N/A	#N/A
Lateolabrax_maculatus_GLEAN_10014244	blue	711.536	-	Voltage-sensitive calcium channels (VSCC) mediate the entry of calcium ions into excitable cells and are also involved in a variety of calcium-dependent processes, including muscle contraction, hormone or neurotransmitter release, gene expression, cell motility, cell division and cell death. The isoform alpha-1B gives rise to N-type calcium currents. N-type calcium channels belong to the 'high-vo…	#N/A	#N/A	#N/A
Lateolabrax_maculatus_GLEAN_10008763	blue	711.095	-	-	#N/A	#N/A	#N/A
Lateolabrax_maculatus_GLEAN_10012096	blue	711.021	RAB11FIP1	RAB11 family interacting protein 1 (class I)	#N/A	#N/A	#N/A
Lateolabrax_maculatus_GLEAN_10016775	blue	710.818	ZNF512B	Zinc finger protein 512B	#N/A	#N/A	#N/A
Lateolabrax_maculatus_GLEAN_10013531	blue	707.604	PRKAR1A	Protein kinase, cAMP-dependent, regulatory, type I, alpha (tissue specific extinguisher 1) b	#N/A	#N/A	#N/A
Lateolabrax_maculatus_GLEAN_10005353	blue	706.177	nab-1	Si ch1073-219n12.1	#N/A	#N/A	#N/A
Lateolabrax_maculatus_GLEAN_10001255	blue	705.911	CCDC88A	coiled-coil domain containing	#N/A	#N/A	#N/A
Lateolabrax_maculatus_GLEAN_10006782	blue	705.908	PHLDB2	Pleckstrin homology-like domain family B member 2	#N/A	#N/A	#N/A
Lateolabrax_maculatus_GLEAN_10016152	blue	704.813	PTPRJ	Protein tyrosine phosphatase, receptor type, J	#N/A	#N/A	#N/A
Lateolabrax_maculatus_GLEAN_10017028	blue	704.623	usp40	Belongs to the peptidase C19 family	#N/A	#N/A	#N/A
Lateolabrax_maculatus_GLEAN_10003162	blue	704.57	ZMYND11	Zinc finger MYND	#N/A	#N/A	#N/A
Lateolabrax_maculatus_GLEAN_10013976	blue	703.246	PRKCB	Protein kinase C beta	#N/A	#N/A	#N/A
Lateolabrax_maculatus_GLEAN_10015440	blue	702.584	ARHGAP35	Rho GTPase activating protein 35a	#N/A	#N/A	#N/A
Lateolabrax_maculatus_GLEAN_10007021	blue	702.33	prr14	Proline rich 14	#N/A	#N/A	#N/A
Lateolabrax_maculatus_GLEAN_10004673	blue	702.318	TNS1	C2 domain of PTEN tumour-suppressor protein	#N/A	#N/A	0.04
Lateolabrax_maculatus_GLEAN_10014493	blue	701.335	MFSD8	major facilitator superfamily	#N/A	#N/A	#N/A
Lateolabrax_maculatus_GLEAN_10022962	blue	701.117	ARFGEF1	ADP-ribosylation factor guanine nucleotide-exchange factor 1 (brefeldin A-inhibited)	#N/A	#N/A	#N/A
Lateolabrax_maculatus_GLEAN_10007187	blue	700.938	FLOT1	Flotillin 1b	#N/A	#N/A	#N/A
Lateolabrax_maculatus_GLEAN_10001928	blue	700.408	IQGAP1	IQ motif containing GTPase activating protein 1	#N/A	#N/A	#N/A
Lateolabrax_maculatus_GLEAN_10003577	blue	700.352	REV3L	REV3-like, catalytic subunit of DNA polymerase zeta (yeast)	#N/A	#N/A	#N/A
Lateolabrax_maculatus_GLEAN_10016230	blue	699.322	GIT2	G protein-coupled receptor kinase interactor 2a	#N/A	#N/A	#N/A
Lateolabrax_maculatus_GLEAN_10002587	blue	699.252	tcf3	Transcription factor	#N/A	#N/A	#N/A
Lateolabrax_maculatus_GLEAN_10001491	blue	698.843	EPB41L2	Erythrocyte membrane protein band 4.1-like 2	#N/A	#N/A	#N/A
Lateolabrax_maculatus_GLEAN_10003931	blue	698.797	STARD9	stAR-related lipid transfer	#N/A	#N/A	#N/A
Lateolabrax_maculatus_GLEAN_10002535	blue	698.781	smc6	Structural maintenance of chromosomes	#N/A	#N/A	#N/A
Lateolabrax_maculatus_GLEAN_10001445	blue	698.318	ESYT2	Extended synaptotagmin-like protein	#N/A	#N/A	#N/A
Lateolabrax_maculatus_GLEAN_10017128	blue	697.28	TNS1	Tensin 1	#N/A	#N/A	0.04
Lateolabrax_maculatus_GLEAN_10011729	blue	697.27	TBC1D8B	TBC1 domain family member	#N/A	#N/A	#N/A
Lateolabrax_maculatus_GLEAN_10009229	blue	696.87	KDM6B	demethylase 6B	#N/A	#N/A	#N/A
Lateolabrax_maculatus_GLEAN_10004735	blue	696.646	GAREM	regulator of	#N/A	#N/A	#N/A
Lateolabrax_maculatus_GLEAN_10003351	blue	696.632	PRRC2B	Proline-rich coiled-coil 2B	#N/A	#N/A	#N/A
Lateolabrax_maculatus_GLEAN_10013388	blue	696.309	ATXN1	Ataxin 1a	#N/A	#N/A	#N/A
Lateolabrax_maculatus_GLEAN_10016081	blue	694.756	CECR2	Cat eye syndrome	#N/A	#N/A	#N/A
Lateolabrax_maculatus_GLEAN_10003042	blue	694.254	AKAP9	anchor protein	#N/A	#N/A	#N/A
Lateolabrax_maculatus_GLEAN_10010993	blue	693.249	COL4A3	Collagen alpha-5(IV) chain-like	#N/A	#N/A	#N/A
Lateolabrax_maculatus_GLEAN_10007034	blue	693.225	SUV420H2	Suppressor of variegation 4-20 homolog 2 (Drosophila)	#N/A	#N/A	#N/A
Lateolabrax_maculatus_GLEAN_10013832	blue	692.738	ANKRD50	ankyrin repeat	#N/A	#N/A	#N/A
Lateolabrax_maculatus_GLEAN_10011651	blue	692.004	XPR1	Xenotropic and polytropic retrovirus receptor 1	#N/A	#N/A	#N/A
Lateolabrax_maculatus_GLEAN_10016842	blue	691.874	WNK2	WNK lysine deficient protein kinase 2	#N/A	#N/A	#N/A
Lateolabrax_maculatus_GLEAN_10015310	blue	691.484	APBB2	Amyloid beta (A4) precursor protein-binding, family B, member	#N/A	#N/A	#N/A
Lateolabrax_maculatus_GLEAN_10017291	blue	691.233	RERE	Arginine-glutamic acid dipeptide	#N/A	#N/A	#N/A
Lateolabrax_maculatus_GLEAN_10009601	blue	690.555	HDLBP	High density lipoprotein-binding protein a	#N/A	#N/A	#N/A
Lateolabrax_maculatus_GLEAN_10005973	blue	690.014	KMT2B	Lysine (K)-specific methyltransferase 2Bb	#N/A	#N/A	#N/A
Lateolabrax_maculatus_GLEAN_10001865	blue	689.148	SYNJ1	Synaptojanin 1	#N/A	#N/A	#N/A
Lateolabrax_maculatus_GLEAN_10006167	blue	688.68	KIAA1462	Junctional protein associated with coronary artery	#N/A	#N/A	0.04
Lateolabrax_maculatus_GLEAN_10003613	blue	687.695	EP300	E1A binding protein p300	#N/A	#N/A	#N/A
Lateolabrax_maculatus_GLEAN_10014091	blue	687.397	CSNK1D	casein kinase	#N/A	#N/A	#N/A
Lateolabrax_maculatus_GLEAN_10001818	blue	687.322	SBNO1	Strawberry notch homolog	#N/A	#N/A	#N/A
Lateolabrax_maculatus_GLEAN_10002435	blue	687.149	ELF1	ETS-related transcription factor Elf-1-like isoform X1	#N/A	#N/A	#N/A
Lateolabrax_maculatus_GLEAN_10017936	blue	686.875	IQSEC1	IQ motif and SEC7	#N/A	#N/A	#N/A
Lateolabrax_maculatus_GLEAN_10008237	blue	686.643	LYST	Lysosomal trafficking regulator	#N/A	#N/A	#N/A
Lateolabrax_maculatus_GLEAN_10001797	blue	686.53	fam208b	Family with sequence similarity 208, member B	#N/A	#N/A	#N/A
Lateolabrax_maculatus_GLEAN_10002986	blue	686.365	LASP1	LIM and SH3	#N/A	#N/A	#N/A
Lateolabrax_maculatus_GLEAN_10011417	blue	686.161	CCDC88C	Coiled-coil domain containing 88C	#N/A	#N/A	#N/A
Lateolabrax_maculatus_GLEAN_10017529	blue	686.007	ATG2B	Autophagy related 2B	#N/A	#N/A	#N/A
Lateolabrax_maculatus_GLEAN_10008655	blue	685.45	CDH5	Cadherins are calcium-dependent cell adhesion proteins	#N/A	#N/A	0.04
Lateolabrax_maculatus_GLEAN_10002860	blue	685.355	OSBPL8	Oxysterol binding protein-like 8	#N/A	#N/A	#N/A
Lateolabrax_maculatus_GLEAN_10017476	blue	685.191	RALGAPB	Ral GTPase activating protein, beta subunit (non-catalytic)	#N/A	#N/A	#N/A
Lateolabrax_maculatus_GLEAN_10005201	blue	684.938	NCOA1	Nuclear receptor coactivator	#N/A	#N/A	0.04
Lateolabrax_maculatus_GLEAN_10001640	blue	684.739	ITGA3	integrin	#N/A	#N/A	#N/A
Lateolabrax_maculatus_GLEAN_10016041	blue	684.461	ZNF292	zinc finger protein	#N/A	#N/A	#N/A
Lateolabrax_maculatus_GLEAN_10017465	blue	683.725	AGRN	Domain found in sea urchin sperm protein, enterokinase, agrin	#N/A	#N/A	#N/A
Lateolabrax_maculatus_GLEAN_10005620	blue	681.732	VPS13A	Vacuolar protein sorting 13 homolog A (S. cerevisiae)	#N/A	#N/A	#N/A
Lateolabrax_maculatus_GLEAN_10018518	blue	681.579	DOCK8	Dedicator of cytokinesis	#N/A	#N/A	#N/A
Lateolabrax_maculatus_GLEAN_10008847	blue	681.31	CMTR1	Cap methyltransferase 1	#N/A	#N/A	#N/A
Lateolabrax_maculatus_GLEAN_10008082	blue	680.961	MAST4	Microtubule associated serine threonine kinase family member 4	#N/A	#N/A	0.04
Lateolabrax_maculatus_GLEAN_10002250	blue	680.803	LOXL4	Lysyl oxidase-like 4	#N/A	#N/A	0.04
Lateolabrax_maculatus_GLEAN_10013115	blue	680.788	FGFR3	Fibroblast growth factor receptor	#N/A	#N/A	0.04
Lateolabrax_maculatus_GLEAN_10017851	blue	680.494	ARID4B	Translocase of outer mitochondrial membrane 20 homolog a (yeast)	#N/A	#N/A	#N/A
Lateolabrax_maculatus_GLEAN_10018813	blue	680.285	B4GALNT3	Transfers N-acetylgalactosamine (GalNAc) from UDP-GalNAc to N-acetylglucosamine-beta-benzyl with a beta-1,4-linkage to form N,N'-diacetyllactosediamine, GalNAc-beta-1,4-GlcNAc structures in N-linked glycans and probably O-linked glycans	#N/A	#N/A	#N/A
Lateolabrax_maculatus_GLEAN_10011633	blue	680.17	CHD7	Chromodomain helicase DNA binding protein 7	#N/A	#N/A	#N/A
Lateolabrax_maculatus_GLEAN_10011532	blue	680.08	HOOK3	Hook microtubule-tethering protein 3	#N/A	#N/A	#N/A
Lateolabrax_maculatus_GLEAN_10017536	blue	679.463	NEK9	NIMA-related kinase 9	#N/A	#N/A	#N/A
Lateolabrax_maculatus_GLEAN_10017786	blue	679.112	ITGA9	integrin	#N/A	#N/A	0.04
Lateolabrax_maculatus_GLEAN_10010088	blue	678.609	DOCK9	dedicator of cytokinesis	#N/A	#N/A	#N/A
Lateolabrax_maculatus_GLEAN_10009877	blue	677.568	NKTR	Natural killer-tumor recognition sequence	#N/A	#N/A	#N/A
Lateolabrax_maculatus_GLEAN_10012193	blue	677.254	CSPG4	Chondroitin sulfate proteoglycan	#N/A	#N/A	0.04
Lateolabrax_maculatus_GLEAN_10003673	blue	676.715	-	Poly ADP-ribose polymerase 12-like	#N/A	#N/A	#N/A
Lateolabrax_maculatus_GLEAN_10011721	blue	676.637	ATRX	SNF2 family N-terminal domain	#N/A	#N/A	#N/A
Lateolabrax_maculatus_GLEAN_10016135	blue	676.507	KIAA1033	WASH complex subunit	#N/A	#N/A	#N/A
Lateolabrax_maculatus_GLEAN_10015480	blue	675.702	CUX1	Cut-like homeobox 1a	#N/A	#N/A	#N/A
Lateolabrax_maculatus_GLEAN_10006660	blue	675.545	PDPK1	3-phosphoinositide dependent protein kinase-1b	#N/A	#N/A	#N/A
Lateolabrax_maculatus_GLEAN_10002599	blue	675.375	STAP2	Signal transducing adaptor family member	#N/A	#N/A	#N/A
Lateolabrax_maculatus_GLEAN_10015626	blue	675.139	FYCO1	FYVE and coiled-coil	#N/A	#N/A	#N/A
Lateolabrax_maculatus_GLEAN_10017809	blue	674.968	TACC2	Transforming, acidic coiled-coil containing protein 2	#N/A	#N/A	0.04
Lateolabrax_maculatus_GLEAN_10017342	blue	674.779	-	PR domain containing 2, with ZNF domain a	#N/A	#N/A	#N/A
Lateolabrax_maculatus_GLEAN_10001475	blue	674.558	PCM1	Pericentriolar material 1	#N/A	#N/A	#N/A
Lateolabrax_maculatus_GLEAN_10011409	blue	674.058	RIN3	Ras and Rab interactor	#N/A	#N/A	#N/A
Lateolabrax_maculatus_GLEAN_10018373	blue	674.055	EGFR	Epidermal growth factor receptor	#N/A	#N/A	#N/A
Lateolabrax_maculatus_GLEAN_10017963	blue	673.341	PLXNB1	Plexin b1b	#N/A	#N/A	#N/A
Lateolabrax_maculatus_GLEAN_10004933	blue	673.189	ARHGEF17	rho guanine nucleotide exchange factor	#N/A	#N/A	#N/A
Lateolabrax_maculatus_GLEAN_10023090	blue	672.598	EIF4G2	Eukaryotic translation initiation factor 4, gamma	#N/A	#N/A	#N/A
Lateolabrax_maculatus_GLEAN_10016761	blue	672.487	NCOA6	Nuclear receptor coactivator 6	#N/A	#N/A	#N/A
Lateolabrax_maculatus_GLEAN_10017157	blue	671.86	nckap5	NCK-associated protein 5	#N/A	#N/A	#N/A
Lateolabrax_maculatus_GLEAN_10001201	blue	671.611	ARHGAP12	Linker region between SH3 and WW domains on ARHGAP12	#N/A	#N/A	#N/A
Lateolabrax_maculatus_GLEAN_10018881	blue	671.447	WNK1	WNK lysine deficient protein kinase	#N/A	#N/A	#N/A
Lateolabrax_maculatus_GLEAN_10018513	blue	671.253	PTCH1	Patched 1	#N/A	#N/A	0.04
Lateolabrax_maculatus_GLEAN_10007811	blue	670.926	DAG1	Dystroglycan 1	#N/A	#N/A	#N/A
Lateolabrax_maculatus_GLEAN_10013298	blue	670.794	ESCO1	Establishment of sister chromatid cohesion N-acetyltransferase 1	#N/A	#N/A	#N/A
Lateolabrax_maculatus_GLEAN_10014074	blue	669.903	EXOC6	Exocyst complex component	#N/A	#N/A	#N/A
Lateolabrax_maculatus_GLEAN_10006552	blue	669.621	ZNF592	zinc finger protein	#N/A	#N/A	#N/A
Lateolabrax_maculatus_GLEAN_10003653	blue	669.482	FLII	Flightless I homolog (Drosophila)	#N/A	#N/A	#N/A
Lateolabrax_maculatus_GLEAN_10005356	blue	669.33	ITGA6	integrin	#N/A	#N/A	#N/A
Lateolabrax_maculatus_GLEAN_10019450	blue	669.236	TRIP11	Thyroid hormone receptor interactor 11	#N/A	#N/A	#N/A
Lateolabrax_maculatus_GLEAN_10007188	blue	669.205	DDR1	Discoidin domain receptor family, member 1	#N/A	#N/A	#N/A
Lateolabrax_maculatus_GLEAN_10002824	blue	669.13	DMD	Dystrophin	#N/A	#N/A	#N/A
Lateolabrax_maculatus_GLEAN_10015952	blue	667.459	ARHGAP21	Rho GTPase activating protein 21a	#N/A	#N/A	#N/A
Lateolabrax_maculatus_GLEAN_10003551	blue	667.395	SEL1L3	Sel-1 suppressor of lin-12-like 3 (C. elegans)	#N/A	#N/A	#N/A
Lateolabrax_maculatus_GLEAN_10006865	blue	667.211	ATP8A1	ATPase, aminophospholipid transporter (APLT), class I, type 8A, member 1	#N/A	#N/A	#N/A
Lateolabrax_maculatus_GLEAN_10009318	blue	667.134	FNBP1L	Formin binding protein 1-like	#N/A	#N/A	#N/A
Lateolabrax_maculatus_GLEAN_10000953	blue	666.97	LAMA5	Laminin, alpha 5	#N/A	0.04	0.04
Lateolabrax_maculatus_GLEAN_10018283	blue	666.441	TNS3	Tensin 3	#N/A	#N/A	#N/A
Lateolabrax_maculatus_GLEAN_10011848	blue	665.787	PTPRF	Protein tyrosine phosphatase, receptor type, f, b	#N/A	#N/A	#N/A
Lateolabrax_maculatus_GLEAN_10001296	blue	665.777	UBTF	Upstream binding transcription factor, RNA polymerase I	#N/A	#N/A	#N/A
Lateolabrax_maculatus_GLEAN_10007304	blue	665.741	ARFGAP3	ADP-ribosylation factor GTPase activating protein 3	#N/A	#N/A	#N/A
Lateolabrax_maculatus_GLEAN_10008161	blue	665.286	KIF1C	Belongs to the TRAFAC class myosin-kinesin ATPase superfamily. Kinesin family	#N/A	#N/A	#N/A
Lateolabrax_maculatus_GLEAN_10007462	blue	664.771	KMT2A	Belongs to the class V-like SAM-binding methyltransferase superfamily. Histone-lysine methyltransferase family. TRX MLL subfamily	#N/A	#N/A	#N/A
Lateolabrax_maculatus_GLEAN_10001558	blue	664.531	PI4KA	Phosphatidylinositol 4-kinase, catalytic, alpha a	#N/A	#N/A	#N/A
Lateolabrax_maculatus_GLEAN_10008504	blue	664.038	SH3GL1	SH3-domain GRB2-like	#N/A	#N/A	#N/A
Lateolabrax_maculatus_GLEAN_10020921	blue	663.452	-	Belongs to the MHC class I family	#N/A	#N/A	#N/A
Lateolabrax_maculatus_GLEAN_10012098	blue	663.352	SORBS3	Sorbin and SH3 domain containing 3	#N/A	#N/A	#N/A
Lateolabrax_maculatus_GLEAN_10016535	blue	663.351	FMNL3	Formin-like	#N/A	#N/A	#N/A
Lateolabrax_maculatus_GLEAN_10013521	blue	662.674	BAHCC1	BAH domain and coiled-coil containing 1	#N/A	#N/A	#N/A
Lateolabrax_maculatus_GLEAN_10007348	blue	662.567	PIK3C2A	Phosphatidylinositol 4-phosphate 3-kinase C2 domain-containing subunit	#N/A	#N/A	#N/A
Lateolabrax_maculatus_GLEAN_10018365	blue	662.499	ROCK1	Rho-associated, coiled-coil containing protein kinase 1	#N/A	#N/A	#N/A
Lateolabrax_maculatus_GLEAN_10008690	blue	662.178	FRYL	Furry homolog-like	#N/A	#N/A	#N/A
Lateolabrax_maculatus_GLEAN_10014553	blue	662.131	ELF1	E74-like factor 1 (ets domain transcription factor)	#N/A	#N/A	#N/A
Lateolabrax_maculatus_GLEAN_10011351	blue	661.028	RHOU	Belongs to the small GTPase superfamily. Rho family	#N/A	#N/A	#N/A
Lateolabrax_maculatus_GLEAN_10007536	blue	660.776	PLXNB2	Plexin b2a	#N/A	#N/A	#N/A
Lateolabrax_maculatus_GLEAN_10007840	blue	659.223	ITGA6	integrin	#N/A	#N/A	#N/A
Lateolabrax_maculatus_GLEAN_10002411	blue	658.814	DLGAP4	Discs, large (Drosophila) homolog-associated protein 4b	#N/A	#N/A	#N/A
Lateolabrax_maculatus_GLEAN_10017260	blue	658.031	ZNF335	zinc finger protein	#N/A	#N/A	#N/A
Lateolabrax_maculatus_GLEAN_10003969	blue	656.635	PARD3	partitioning defective 3 homolog	#N/A	#N/A	#N/A
Lateolabrax_maculatus_GLEAN_10016847	blue	656.171	BICD2	bicaudal D homolog 2	#N/A	#N/A	#N/A
Lateolabrax_maculatus_GLEAN_10017168	blue	655.975	COL6A3	collagen	#N/A	#N/A	0.04
Lateolabrax_maculatus_GLEAN_10010078	blue	655.575	HNRNPA3	Heterogeneous nuclear ribonucleoprotein A3	#N/A	#N/A	#N/A
Lateolabrax_maculatus_GLEAN_10017787	blue	655.355	ZC3H6	Zinc finger CCCH-type containing 8	#N/A	#N/A	#N/A
Lateolabrax_maculatus_GLEAN_10010293	blue	654.834	LPHN2	Belongs to the G-protein coupled receptor 2 family	#N/A	#N/A	#N/A
Lateolabrax_maculatus_GLEAN_10002499	blue	654.578	osp	Myosin phosphatase Rho-interacting protein-like isoform X1	#N/A	#N/A	#N/A
Lateolabrax_maculatus_GLEAN_10017638	blue	654.401	COL12A1	Collagen, type XII, alpha	#N/A	#N/A	#N/A
Lateolabrax_maculatus_GLEAN_10006930	blue	654.309	KDM2B	Lysine (K)-specific demethylase 2B	#N/A	#N/A	#N/A
Lateolabrax_maculatus_GLEAN_10002687	blue	654.239	COL4A5	Collagen, type IV, alpha 5 (Alport syndrome)	#N/A	#N/A	0.04
Lateolabrax_maculatus_GLEAN_10006272	blue	653.65	SMG6	Smg-6 homolog, nonsense mediated mRNA decay factor (C. elegans)	#N/A	#N/A	#N/A
Lateolabrax_maculatus_GLEAN_10010778	blue	652.931	KIF13B	Belongs to the TRAFAC class myosin-kinesin ATPase superfamily. Kinesin family	#N/A	#N/A	#N/A
Lateolabrax_maculatus_GLEAN_10004828	blue	652.839	AKAP12	A kinase (PRKA) anchor protein (gravin) 12b	#N/A	#N/A	#N/A
Lateolabrax_maculatus_GLEAN_10000800	blue	652.2	RPRD2	Regulation of nuclear pre-mRNA	#N/A	#N/A	#N/A
Lateolabrax_maculatus_GLEAN_10005564	blue	651.949	PRKACA	Protein kinase, cAMP-dependent, catalytic, alpha, genome duplicate	#N/A	#N/A	#N/A
Lateolabrax_maculatus_GLEAN_10016776	blue	651.515	UCKL1	Belongs to the uridine kinase family	#N/A	#N/A	#N/A
Lateolabrax_maculatus_GLEAN_10018746	blue	650.927	PTPRG	Carbonic anhydrase XVI b	#N/A	#N/A	#N/A
Lateolabrax_maculatus_GLEAN_10018199	blue	650.71	GPC1	Cell surface proteoglycan that bears heparan sulfate	#N/A	#N/A	#N/A
Lateolabrax_maculatus_GLEAN_10010804	blue	650.628	ZNF217	Zinc finger protein 217	#N/A	#N/A	#N/A
Lateolabrax_maculatus_GLEAN_10016790	blue	650.286	DAG1	Dystroglycan 1 (dystrophin-associated glycoprotein 1)	#N/A	#N/A	#N/A
Lateolabrax_maculatus_GLEAN_10006435	blue	649.365	SLC16A3	monocarboxylate transporter	#N/A	#N/A	#N/A
Lateolabrax_maculatus_GLEAN_10000458	blue	649.324	ANKRD12	ankyrin repeat	#N/A	#N/A	#N/A
Lateolabrax_maculatus_GLEAN_10005245	blue	648.881	INSR	insulin receptor	#N/A	#N/A	#N/A
Lateolabrax_maculatus_GLEAN_10012771	blue	648.76	SDPR	Serum deprivation response a	#N/A	#N/A	#N/A
Lateolabrax_maculatus_GLEAN_10007753	blue	648.697	BAHCC1	BAH domain and coiled-coil containing 1	#N/A	#N/A	#N/A
Lateolabrax_maculatus_GLEAN_10016421	blue	648.099	ANO1	Anoctamin 1, calcium activated chloride channel	#N/A	#N/A	#N/A
Lateolabrax_maculatus_GLEAN_10014041	blue	647.797	-	Plectin repeat	#N/A	#N/A	#N/A
Lateolabrax_maculatus_GLEAN_10012197	blue	647.402	PEAK1	Pseudopodium-enriched atypical kinase 1	#N/A	#N/A	#N/A
Lateolabrax_maculatus_GLEAN_10006148	blue	647.354	VAV3	guanine nucleotide exchange factor	#N/A	#N/A	#N/A
Lateolabrax_maculatus_GLEAN_10009077	blue	646.185	MPHOSPH8	M-phase phosphoprotein 8	#N/A	#N/A	#N/A
Lateolabrax_maculatus_GLEAN_10013546	blue	646.131	MICAL2	Microtubule associated monooxygenase, calponin and LIM domain containing	#N/A	#N/A	#N/A
Lateolabrax_maculatus_GLEAN_10008085	blue	646.091	ERBB2IP	Erbb2 interacting protein	#N/A	#N/A	#N/A
Lateolabrax_maculatus_GLEAN_10007718	blue	645.906	-	Pleckstrin homology-like domain family B member	#N/A	#N/A	0.04
Lateolabrax_maculatus_GLEAN_10006133	blue	645.586	-	-	#N/A	#N/A	#N/A
Lateolabrax_maculatus_GLEAN_10019155	blue	644.713	FGFR1	Fibroblast growth factor receptor	#N/A	#N/A	#N/A
Lateolabrax_maculatus_GLEAN_10012926	blue	644.389	PLEC	Plectin-like isoform X1	#N/A	#N/A	#N/A
Lateolabrax_maculatus_GLEAN_10006269	blue	643.35	SSH2	Slingshot homolog	#N/A	#N/A	#N/A
Lateolabrax_maculatus_GLEAN_10014584	blue	642.826	ZNF609	Zinc finger protein 609	#N/A	#N/A	#N/A
Lateolabrax_maculatus_GLEAN_10009616	blue	642.811	ITSN1	Intersectin 1 (SH3 domain protein)	#N/A	#N/A	#N/A
Lateolabrax_maculatus_GLEAN_10005804	blue	642.596	FBXO11	F-box only protein	#N/A	#N/A	#N/A
Lateolabrax_maculatus_GLEAN_10005749	blue	642.174	RAI14	Retinoic acid induced 14	#N/A	#N/A	#N/A
Lateolabrax_maculatus_GLEAN_10007530	blue	642.013	SETD2	SET domain containing 2	#N/A	#N/A	#N/A
Lateolabrax_maculatus_GLEAN_10016566	blue	641.584	PHF8	PHD finger protein 8	#N/A	#N/A	#N/A
Lateolabrax_maculatus_GLEAN_10001963	blue	641.287	-	Belongs to the TRAFAC class myosin-kinesin ATPase superfamily. Myosin family	#N/A	#N/A	#N/A
Lateolabrax_maculatus_GLEAN_10007012	blue	641.152	USP9X	Ubiquitin specific peptidase 9	#N/A	#N/A	#N/A
Lateolabrax_maculatus_GLEAN_10014676	blue	641.044	AKAP13	regulation of glucocorticoid mediated signaling pathway	#N/A	#N/A	#N/A
Lateolabrax_maculatus_GLEAN_10016412	blue	640.308	VPS13D	Vacuolar protein	#N/A	#N/A	#N/A
Lateolabrax_maculatus_GLEAN_10003390	blue	639.895	ABCA3	ATP-binding cassette sub-family A	#N/A	#N/A	#N/A
Lateolabrax_maculatus_GLEAN_10015047	blue	639.772	MYO18A	Belongs to the TRAFAC class myosin-kinesin ATPase superfamily. Myosin family	#N/A	#N/A	#N/A
Lateolabrax_maculatus_GLEAN_10015040	blue	639.605	NUFIP2	Nuclear fragile X mental	#N/A	#N/A	#N/A
Lateolabrax_maculatus_GLEAN_10001283	blue	637.25	MACF1	Microtubule-actin cross-linking factor 1	#N/A	#N/A	#N/A
Lateolabrax_maculatus_GLEAN_10001198	blue	637.053	ABCA1	ATP-binding cassette sub-family A	#N/A	#N/A	0.04
Lateolabrax_maculatus_GLEAN_10007886	blue	636.039	DYNC2H1	2, heavy chain	#N/A	#N/A	#N/A
Lateolabrax_maculatus_GLEAN_10006157	blue	636.031	SLC12A7	Solute carrier family 12 member	#N/A	#N/A	#N/A
Lateolabrax_maculatus_GLEAN_10012970	blue	635.566	MROH1	Maestro heat-like repeat family member 1	#N/A	#N/A	#N/A
Lateolabrax_maculatus_GLEAN_10011240	blue	635.079	-	Rapunzel 4	#N/A	#N/A	#N/A
Lateolabrax_maculatus_GLEAN_10016562	blue	634.727	SMC1A	Structural maintenance of chromosomes	#N/A	#N/A	#N/A
Lateolabrax_maculatus_GLEAN_10003563	blue	634.647	TRIO	Trio Rho guanine nucleotide exchange factor a	#N/A	#N/A	#N/A
Lateolabrax_maculatus_GLEAN_10002531	blue	634.555	ITGB1	integrin	#N/A	#N/A	#N/A
Lateolabrax_maculatus_GLEAN_10017057	blue	634.51	PTPN21	phosphatase non-receptor type 21	#N/A	#N/A	#N/A
Lateolabrax_maculatus_GLEAN_10016274	blue	632.709	LNPEP	Leucyl cystinyl aminopeptidase	#N/A	#N/A	#N/A
Lateolabrax_maculatus_GLEAN_10008089	blue	632.054	TNFRSF10A	Tumor necrosis factor receptor superfamily member	#N/A	#N/A	#N/A
Lateolabrax_maculatus_GLEAN_10018433	blue	631.959	WHSC1L1	Wolf-Hirschhorn syndrome candidate 1-like 1	#N/A	#N/A	#N/A
Lateolabrax_maculatus_GLEAN_10007706	blue	631.945	AGO4	Required for RNA-mediated gene silencing (RNAi). Binds to short RNAs such as microRNAs (miRNAs) and represses the translation of mRNAs which are complementary to them. Lacks endonuclease activity and does not appear to cleave target mRNAs	#N/A	#N/A	#N/A
Lateolabrax_maculatus_GLEAN_10007616	blue	631.874	-	FYVE and coiled-coil	#N/A	#N/A	#N/A
Lateolabrax_maculatus_GLEAN_10011676	blue	631.859	MINK1	Misshapen-like kinase 1	#N/A	#N/A	#N/A
Lateolabrax_maculatus_GLEAN_10012741	blue	631.108	FN1	Fibronectin 1a	#N/A	#N/A	#N/A
Lateolabrax_maculatus_GLEAN_10008059	blue	630.116	FAT2	FAT tumor suppressor homolog 2 (Drosophila)	#N/A	#N/A	#N/A
Lateolabrax_maculatus_GLEAN_10007869	blue	629.809	INPPL1	Inositol polyphosphate phosphatase-like 1a	#N/A	#N/A	#N/A
Lateolabrax_maculatus_GLEAN_10012572	blue	629.264	ell3	Elongation factor RNA polymerase II-like 3	#N/A	#N/A	#N/A
Lateolabrax_maculatus_GLEAN_10012400	blue	628.748	SPTAN1	Spectrin alpha	#N/A	#N/A	#N/A
Lateolabrax_maculatus_GLEAN_10004656	blue	628.073	TRAK1	Trafficking protein, kinesin binding 1	#N/A	#N/A	#N/A
Lateolabrax_maculatus_GLEAN_10001751	blue	627.911	DPF3	D4, zinc and double PHD fingers, family 3	#N/A	#N/A	0.04
Lateolabrax_maculatus_GLEAN_10018085	blue	627.84	STAG2	Stromal antigen	#N/A	#N/A	#N/A
Lateolabrax_maculatus_GLEAN_10009421	blue	626.595	NRIP1	Nuclear receptor interacting protein	#N/A	#N/A	#N/A
Lateolabrax_maculatus_GLEAN_10018084	blue	626.23	EFNB1	Belongs to the ephrin family	#N/A	#N/A	#N/A
Lateolabrax_maculatus_GLEAN_10010464	blue	626.01	kmt2c	Histone-lysine N-methyltransferase	#N/A	#N/A	#N/A
Lateolabrax_maculatus_GLEAN_10010207	blue	625.626	wit	Bone morphogenetic protein receptor	#N/A	#N/A	0.04
Lateolabrax_maculatus_GLEAN_10018928	blue	624.589	ZNF469	Zinc finger protein	#N/A	#N/A	0.04
Lateolabrax_maculatus_GLEAN_10001874	blue	624.513	GCC2	GRIP and coiled-coil	#N/A	#N/A	#N/A
Lateolabrax_maculatus_GLEAN_10008927	blue	624.098	MKLN1	Muskelin 1, intracellular mediator containing kelch motifs	#N/A	#N/A	#N/A
Lateolabrax_maculatus_GLEAN_10022598	blue	623.729	SEC62	SEC62 homolog, preprotein translocation factor	#N/A	#N/A	#N/A
Lateolabrax_maculatus_GLEAN_10006326	blue	623.227	GRK6	G protein-coupled receptor kinase	#N/A	#N/A	#N/A
Lateolabrax_maculatus_GLEAN_10013007	blue	622.185	IPO7	Importin 7	#N/A	#N/A	#N/A
Lateolabrax_maculatus_GLEAN_10023046	blue	622.183	RBM33	RNA binding motif protein 33	#N/A	#N/A	#N/A
Lateolabrax_maculatus_GLEAN_10015915	blue	622.157	ITGA5	Integrin, alpha 5 (fibronectin receptor, alpha polypeptide)	#N/A	#N/A	0.04
Lateolabrax_maculatus_GLEAN_10011336	blue	621.369	VPS26A	Vacuolar protein sorting 26 homolog A (yeast)	#N/A	#N/A	#N/A
Lateolabrax_maculatus_GLEAN_10011259	blue	621.296	RGL2	Ral guanine nucleotide dissociation stimulator-like	#N/A	#N/A	#N/A
Lateolabrax_maculatus_GLEAN_10014817	blue	620.95	MAST2	Microtubule associated serine threonine kinase 2	#N/A	#N/A	#N/A
Lateolabrax_maculatus_GLEAN_10010427	blue	620.924	-	nucleic acid-templated transcription	#N/A	#N/A	#N/A
Lateolabrax_maculatus_GLEAN_10000702	blue	620.322	SNX13	Sorting nexin 13	#N/A	#N/A	#N/A
Lateolabrax_maculatus_GLEAN_10001012	blue	619.79	SBNO2	Strawberry notch homolog	#N/A	#N/A	#N/A
Lateolabrax_maculatus_GLEAN_10014245	blue	619.659	MAN1B1	Mannosidase, alpha, class 1B, member 1	#N/A	#N/A	#N/A
Lateolabrax_maculatus_GLEAN_10006636	blue	619.278	SPTLC2	Serine palmitoyltransferase, long chain base subunit	#N/A	#N/A	#N/A
Lateolabrax_maculatus_GLEAN_10017808	blue	619.224	TACC2	Transforming, acidic coiled-coil containing protein 2	#N/A	#N/A	#N/A
Lateolabrax_maculatus_GLEAN_10005506	blue	618.979	FRY	furry homolog	#N/A	#N/A	#N/A
Lateolabrax_maculatus_GLEAN_10008696	blue	618.911	SH3RF1	SH3 domain containing ring finger 1	#N/A	#N/A	#N/A
Lateolabrax_maculatus_GLEAN_10016833	blue	618.677	ZFYVE20	Zinc finger, FYVE domain containing 20	#N/A	#N/A	#N/A
Lateolabrax_maculatus_GLEAN_10013040	blue	618.355	AP1G1	Adaptor-related protein complex 1, gamma 1 subunit	#N/A	#N/A	#N/A
Lateolabrax_maculatus_GLEAN_10014065	blue	618.074	MTR	5-methyltetrahydrofolate-homocysteine methyltransferase	#N/A	#N/A	#N/A
Lateolabrax_maculatus_GLEAN_10010950	blue	618.014	TOP1	Topoisomerase (DNA) I	#N/A	#N/A	#N/A
Lateolabrax_maculatus_GLEAN_10007866	blue	617.999	ARAP1	ArfGAP with RhoGAP domain, ankyrin repeat and PH domain	#N/A	#N/A	#N/A
Lateolabrax_maculatus_GLEAN_10003294	blue	617.652	-	-	#N/A	#N/A	#N/A
Lateolabrax_maculatus_GLEAN_10001392	blue	617.402	SH3PXD2B	SH3 and PX	#N/A	#N/A	#N/A
Lateolabrax_maculatus_GLEAN_10016532	blue	616.745	LRP1	lipoprotein receptor-related protein	#N/A	#N/A	0.04
Lateolabrax_maculatus_GLEAN_10010125	blue	616.609	SNX9	Sorting nexin	#N/A	#N/A	#N/A
Lateolabrax_maculatus_GLEAN_10011090	blue	616.537	-	Aryl hydrocarbon	#N/A	#N/A	0.04
Lateolabrax_maculatus_GLEAN_10017466	blue	615.347	csw	Protein tyrosine phosphatase, non-receptor type 11, b	#N/A	#N/A	#N/A
Lateolabrax_maculatus_GLEAN_10017387	blue	614.161	mbd6	domain protein	#N/A	#N/A	#N/A
Lateolabrax_maculatus_GLEAN_10008074	blue	613.423	DCLK2	Doublecortin-like kinase 2	#N/A	#N/A	#N/A
Lateolabrax_maculatus_GLEAN_10005238	blue	613.332	FBN3	Fibrillin	#N/A	#N/A	0.04
Lateolabrax_maculatus_GLEAN_10017756	blue	612.485	DST	Dystonin	#N/A	#N/A	#N/A
Lateolabrax_maculatus_GLEAN_10017532	blue	611.838	EML5	Echinoderm microtubule associated protein like 5	#N/A	#N/A	#N/A
Lateolabrax_maculatus_GLEAN_10014556	blue	611.801	DIAPH2	Protein diaphanous homolog	#N/A	#N/A	#N/A
Lateolabrax_maculatus_GLEAN_10010881	blue	611.345	ITPR3	receptor, type	#N/A	#N/A	#N/A
Lateolabrax_maculatus_GLEAN_10007956	blue	611.233	CUL5	Belongs to the cullin family	#N/A	#N/A	#N/A
Lateolabrax_maculatus_GLEAN_10014227	blue	610.415	PREX2	Phosphatidylinositol-3,4,5-trisphosphate-dependent Rac exchange factor 2	#N/A	#N/A	#N/A
Lateolabrax_maculatus_GLEAN_10007500	blue	610.035	TAX1BP1	Tax1 (human T-cell leukemia virus type I) binding protein	#N/A	#N/A	#N/A
Lateolabrax_maculatus_GLEAN_10015246	blue	609.943	KANK4	KN motif and ankyrin repeat	0.04	#N/A	0.04
Lateolabrax_maculatus_GLEAN_10019009	blue	609.884	RABL6	RAB, member RAS oncogene family-like 6	#N/A	#N/A	#N/A
Lateolabrax_maculatus_GLEAN_10011031	blue	609.811	PC	Catalyzes a 2-step reaction, involving the ATP-dependent carboxylation of the covalently attached biotin in the first step and the transfer of the carboxyl group to pyruvate in the second	#N/A	#N/A	#N/A
Lateolabrax_maculatus_GLEAN_10008808	blue	609.114	ARHGAP27	Rho GTPase activating protein 27	#N/A	#N/A	#N/A
Lateolabrax_maculatus_GLEAN_10007189	blue	609.055	GNL1	Guanine nucleotide binding protein-like 1	#N/A	#N/A	#N/A
Lateolabrax_maculatus_GLEAN_10018369	blue	608.269	MIB1	Mindbomb E3 ubiquitin protein ligase 1	#N/A	#N/A	#N/A
Lateolabrax_maculatus_GLEAN_10012275	blue	607.472	PLEKHG1	Pleckstrin homology domain containing, family G (with RhoGef domain) member 1	#N/A	#N/A	#N/A
Lateolabrax_maculatus_GLEAN_10002600	blue	606.762	-	Nuclear receptor ROR-beta-like isoform X1	#N/A	#N/A	#N/A
Lateolabrax_maculatus_GLEAN_10008724	blue	606.742	FRAS1	extracellular matrix	#N/A	#N/A	#N/A
Lateolabrax_maculatus_GLEAN_10004899	blue	606.567	DLG1	large homolog	#N/A	#N/A	#N/A
Lateolabrax_maculatus_GLEAN_10012009	blue	606.027	RAPGEF5	Rap guanine nucleotide exchange factor	#N/A	#N/A	#N/A
Lateolabrax_maculatus_GLEAN_10004037	blue	605.633	NSD1	Histone-lysine N-methyltransferase, H3 lysine-36 and H4 lysine-20	#N/A	#N/A	#N/A
Lateolabrax_maculatus_GLEAN_10004728	blue	605.121	KIAA0513	Zgc 91860	#N/A	#N/A	#N/A
Lateolabrax_maculatus_GLEAN_10010657	blue	605.108	COL8A2	Collagen, type VIII, alpha 2	#N/A	#N/A	0.04
Lateolabrax_maculatus_GLEAN_10013086	blue	604.837	TTC31	Tetratricopeptide repeat domain 31	#N/A	#N/A	#N/A
Lateolabrax_maculatus_GLEAN_10008216	blue	604.79	CASKIN2	CASK interacting protein 2	#N/A	#N/A	#N/A
Lateolabrax_maculatus_GLEAN_10009126	blue	604.509	PRRC2A	Proline-rich coiled-coil 2A	#N/A	#N/A	#N/A
Lateolabrax_maculatus_GLEAN_10018004	blue	604.191	KIAA1210	protein KIAA1211-like isoform X1	#N/A	#N/A	#N/A
Lateolabrax_maculatus_GLEAN_10001655	blue	604.179	PPP2R3A	Protein phosphatase 2, regulatory subunit B, alpha	#N/A	#N/A	#N/A
Lateolabrax_maculatus_GLEAN_10011399	blue	603.935	AIM1	absent in melanoma	#N/A	#N/A	#N/A
Lateolabrax_maculatus_GLEAN_10008757	blue	602.544	ehbp1l1	EH domain binding protein 1-like 1	#N/A	#N/A	#N/A
Lateolabrax_maculatus_GLEAN_10004387	blue	602.369	LRRC16A	Capping protein regulator and myosin 1 linker 1	#N/A	#N/A	#N/A
Lateolabrax_maculatus_GLEAN_10004230	blue	602.186	BAHD1	Bromo adjacent homology	#N/A	#N/A	#N/A
Lateolabrax_maculatus_GLEAN_10010763	blue	600.996	IGF1R	Insulin-like growth factor	#N/A	#N/A	#N/A
Lateolabrax_maculatus_GLEAN_10002246	blue	600.828	SHROOM3	Shroom family member 3	#N/A	#N/A	#N/A
Lateolabrax_maculatus_GLEAN_10001514	blue	600.661	PTPN22	phosphatase, non-receptor type	#N/A	#N/A	#N/A
Lateolabrax_maculatus_GLEAN_10008887	blue	600.312	ATAD2B	ATPase family, AAA	#N/A	#N/A	#N/A
Lateolabrax_maculatus_GLEAN_10016753	blue	600.27	KCNH2	Potassium voltage-gated channel, subfamily H	#N/A	#N/A	0.04
Lateolabrax_maculatus_GLEAN_10012253	blue	600.002	AIM1	absent in melanoma	#N/A	#N/A	#N/A
Lateolabrax_maculatus_GLEAN_10018572	blue	599.677	LMBRD2	LMBR1 domain containing 2a	#N/A	#N/A	#N/A
Lateolabrax_maculatus_GLEAN_10004736	blue	599.402	PRKDC	Protein kinase, DNA-activated, catalytic polypeptide	#N/A	#N/A	#N/A
Lateolabrax_maculatus_GLEAN_10002528	blue	599.161	RGAG4	chromatin binding	#N/A	#N/A	0.04
Lateolabrax_maculatus_GLEAN_10000862	blue	598.79	SSFA2	Sperm specific antigen 2	#N/A	#N/A	#N/A
Lateolabrax_maculatus_GLEAN_10015655	blue	598.762	GNA11	Guanine nucleotide binding protein (G protein), alpha	#N/A	#N/A	#N/A
Lateolabrax_maculatus_GLEAN_10013330	blue	598.229	GLI3	Transcriptional activator	#N/A	#N/A	#N/A
Lateolabrax_maculatus_GLEAN_10015426	blue	597.91	LRRC8C	Leucine rich repeat containing 8 family, member C	#N/A	#N/A	#N/A
Lateolabrax_maculatus_GLEAN_10011962	blue	597.536	CLASP2	Cytoplasmic linker associated protein 2	#N/A	#N/A	#N/A
Lateolabrax_maculatus_GLEAN_10008948	blue	597.17	CCDC107	Coiled-coil domain-containing protein	#N/A	#N/A	#N/A
Lateolabrax_maculatus_GLEAN_10018279	blue	596.261	DSG2	Component of intercellular desmosome junctions. Involved in the interaction of plaque proteins and intermediate filaments mediating cell-cell adhesion	#N/A	#N/A	#N/A
Lateolabrax_maculatus_GLEAN_10004768	blue	595.718	-	Human immunodeficiency virus type I enhancer binding protein 3a	#N/A	#N/A	#N/A
Lateolabrax_maculatus_GLEAN_10016567	blue	594.951	WNK3	WNK lysine deficient protein kinase 3	#N/A	#N/A	#N/A
Lateolabrax_maculatus_GLEAN_10008080	blue	594.818	PIK3R1	Phosphoinositide-3-kinase, regulatory subunit 1 (p85 alpha)	#N/A	#N/A	#N/A
Lateolabrax_maculatus_GLEAN_10010425	blue	594.615	WDR48	WD repeat domain 48	#N/A	#N/A	#N/A
Lateolabrax_maculatus_GLEAN_10008548	blue	594.602	ARHGAP31	Rho GTPase activating protein 31	#N/A	#N/A	#N/A
Lateolabrax_maculatus_GLEAN_10017701	blue	594.431	WDFY4	WDFY family member 4	#N/A	#N/A	#N/A
Lateolabrax_maculatus_GLEAN_10013853	blue	594.289	HLF	Hepatic leukemia	#N/A	#N/A	#N/A
Lateolabrax_maculatus_GLEAN_10018401	blue	592.852	ADAMTS12	ADAM metallopeptidase with thrombospondin type 1 motif, 12	#N/A	#N/A	#N/A
Lateolabrax_maculatus_GLEAN_10008252	blue	592.509	PTK7	protein tyrosine kinase	#N/A	#N/A	#N/A
Lateolabrax_maculatus_GLEAN_10008861	blue	592.383	ZBTB38	Zinc finger and BTB	#N/A	#N/A	#N/A
Lateolabrax_maculatus_GLEAN_10007258	blue	592.225	LTBP1	Latent transforming growth factor beta binding protein 1	#N/A	#N/A	0.04
Lateolabrax_maculatus_GLEAN_10005002	blue	592.145	-	apolipoprotein	#N/A	#N/A	#N/A
Lateolabrax_maculatus_GLEAN_10003104	blue	591.848	BCOR	BCL6 co-repressor	#N/A	#N/A	#N/A
Lateolabrax_maculatus_GLEAN_10014531	blue	591.819	SYTL4	Synaptotagmin-like	#N/A	#N/A	#N/A
Lateolabrax_maculatus_GLEAN_10012260	blue	590.814	GRIK2	Glutamate receptor ionotropic, kainate	#N/A	#N/A	0.04
Lateolabrax_maculatus_GLEAN_10003893	blue	590.631	MYH10	Belongs to the TRAFAC class myosin-kinesin ATPase superfamily. Myosin family	#N/A	#N/A	0.04
Lateolabrax_maculatus_GLEAN_10004496	blue	590.509	AGL	Amylo-1, 6-glucosidase, 4-alpha-glucanotransferase	#N/A	#N/A	#N/A
Lateolabrax_maculatus_GLEAN_10002124	blue	589.984	CGNL1	Cingulin-like 1	#N/A	#N/A	#N/A
Lateolabrax_maculatus_GLEAN_10012712	blue	589.719	CHPF	Chondroitin polymerizing factor	#N/A	#N/A	#N/A
Lateolabrax_maculatus_GLEAN_10017515	blue	589.599	TENC1	Tensin like C1 domain containing phosphatase	#N/A	#N/A	#N/A
Lateolabrax_maculatus_GLEAN_10015771	blue	589.304	AKT2	Protein kinase C terminal domain	#N/A	#N/A	#N/A
Lateolabrax_maculatus_GLEAN_10017654	blue	589.174	RALGAPA2	Ral GTPase activating protein, alpha subunit 2 (catalytic)	#N/A	#N/A	#N/A
Lateolabrax_maculatus_GLEAN_10004530	blue	588.494	CALCRL	Calcitonin gene-related peptide type 1	#N/A	#N/A	0.04
Lateolabrax_maculatus_GLEAN_10016371	blue	587.709	PLCH2	Phospholipase C, eta 2a	#N/A	#N/A	#N/A
Lateolabrax_maculatus_GLEAN_10016319	blue	586.93	lamb2	Laminin, beta 2-like	#N/A	#N/A	#N/A
Lateolabrax_maculatus_GLEAN_10001315	blue	585.393	ARNT	Aryl hydrocarbon receptor nuclear	#N/A	#N/A	#N/A
Lateolabrax_maculatus_GLEAN_10015530	blue	584.862	ARHGAP42	Rho GTPase activating protein 42	#N/A	#N/A	#N/A
Lateolabrax_maculatus_GLEAN_10013070	blue	583.813	UBE3A	ligase E3A	#N/A	#N/A	#N/A
Lateolabrax_maculatus_GLEAN_10006830	blue	583.527	rsbn1l	Round spermatid basic protein 1-like	#N/A	#N/A	#N/A
Lateolabrax_maculatus_GLEAN_10006766	blue	583.474	NRG2	Neuregulin 2a	#N/A	#N/A	#N/A
Lateolabrax_maculatus_GLEAN_10009390	blue	583.176	CSNK1G2	Casein kinase 1, gamma 2a	#N/A	#N/A	#N/A
Lateolabrax_maculatus_GLEAN_10013423	blue	582.931	FAM83H	Family with sequence similarity 83 member H	#N/A	#N/A	#N/A
Lateolabrax_maculatus_GLEAN_10017318	blue	582.216	CHL1	Cell adhesion molecule with homology to L1CAM (close homolog of L1) a	#N/A	#N/A	#N/A
Lateolabrax_maculatus_GLEAN_10017108	blue	581.65	RLF	Rearranged L-myc fusion	#N/A	#N/A	#N/A
Lateolabrax_maculatus_GLEAN_10009535	blue	581.321	DLG5	large homolog	#N/A	#N/A	#N/A
Lateolabrax_maculatus_GLEAN_10017165	blue	581.036	LRRFIP1	Leucine rich repeat (in FLII) interacting protein	#N/A	#N/A	#N/A
Lateolabrax_maculatus_GLEAN_10002660	blue	580.206	ABCA5	ATP-binding cassette sub-family A	#N/A	#N/A	#N/A
Lateolabrax_maculatus_GLEAN_10022855	blue	579.972	-	Belongs to the histidine acid phosphatase family	#N/A	#N/A	#N/A
Lateolabrax_maculatus_GLEAN_10004436	blue	579.861	HIVEP2	Human immunodeficiency virus type I enhancer binding protein	#N/A	#N/A	#N/A
Lateolabrax_maculatus_GLEAN_10022944	blue	579.421	DNAJC13	homolog subfamily C member 13	#N/A	#N/A	#N/A
Lateolabrax_maculatus_GLEAN_10001375	blue	579.412	CSNK1E	Casein kinase 1, epsilon	#N/A	#N/A	#N/A
Lateolabrax_maculatus_GLEAN_10010321	blue	579.384	KDM2A	demethylase	#N/A	#N/A	#N/A
Lateolabrax_maculatus_GLEAN_10001552	blue	578.94	RASGRF2	guanine nucleotide-releasing factor	#N/A	#N/A	#N/A
Lateolabrax_maculatus_GLEAN_10002461	blue	578.811	NBEAL1	Neurobeachin-like	#N/A	#N/A	#N/A
Lateolabrax_maculatus_GLEAN_10003622	blue	578.762	ACO2	Aconitate hydratase	#N/A	#N/A	#N/A
Lateolabrax_maculatus_GLEAN_10008096	blue	578.754	-	KN motif and ankyrin repeat	#N/A	#N/A	#N/A
Lateolabrax_maculatus_GLEAN_10011389	blue	578.712	DAAM2	activator of morphogenesis	#N/A	#N/A	#N/A
Lateolabrax_maculatus_GLEAN_10001807	blue	578.392	PTPN11	phosphatase, non-receptor type 11	#N/A	#N/A	#N/A
Lateolabrax_maculatus_GLEAN_10016103	blue	578.181	KIAA1549	Si ch211-1e14.1	#N/A	#N/A	0.04
Lateolabrax_maculatus_GLEAN_10005106	blue	577.783	myo1e	Belongs to the TRAFAC class myosin-kinesin ATPase superfamily. Myosin family	#N/A	#N/A	#N/A
Lateolabrax_maculatus_GLEAN_10007108	blue	577.705	CCPG1	pre-B-cell leukemia homeobox interacting protein 1	#N/A	#N/A	#N/A
Lateolabrax_maculatus_GLEAN_10000915	blue	576.976	ACIN1	Apoptotic chromatin condensation inducer	#N/A	#N/A	#N/A
Lateolabrax_maculatus_GLEAN_10001407	blue	576.827	FAM208A	Protein of unknown function (DUF3715)	#N/A	#N/A	#N/A
Lateolabrax_maculatus_GLEAN_10015781	blue	576.803	BBX	HMG box transcription factor	#N/A	#N/A	#N/A
Lateolabrax_maculatus_GLEAN_10018471	blue	576.782	MAPKAPK5	Mitogen-activated protein kinase-activated protein kinase 5	#N/A	#N/A	#N/A
Lateolabrax_maculatus_GLEAN_10008574	blue	575.989	PRKCB	Protein kinase C beta	#N/A	#N/A	#N/A
Lateolabrax_maculatus_GLEAN_10011468	blue	575.344	TNRC6C	Trinucleotide repeat containing 6C	#N/A	#N/A	0.04
Lateolabrax_maculatus_GLEAN_10016663	blue	575.171	INPP5F	Inositol polyphosphate-5-phosphatase F	#N/A	#N/A	#N/A
Lateolabrax_maculatus_GLEAN_10015423	blue	574.871	TGFBR3	Transforming growth factor, beta receptor	#N/A	#N/A	0.04
Lateolabrax_maculatus_GLEAN_10018716	blue	574.772	EDEM1	ER degradation enhancer, mannosidase alpha-like 1	#N/A	#N/A	#N/A
Lateolabrax_maculatus_GLEAN_10005212	blue	573.991	CAMSAP3	Calmodulin regulated spectrin-associated protein family, member 3	#N/A	#N/A	#N/A
Lateolabrax_maculatus_GLEAN_10015306	blue	573.845	SLIT2	homolog 2	#N/A	#N/A	0.04
Lateolabrax_maculatus_GLEAN_10014633	blue	573.263	SEMA6D	Sema domain, transmembrane domain (TM), and cytoplasmic domain, (semaphorin) 6D, like	#N/A	#N/A	#N/A
Lateolabrax_maculatus_GLEAN_10012850	blue	573.242	ST3GAL3	Belongs to the glycosyltransferase 29 family	#N/A	#N/A	#N/A
Lateolabrax_maculatus_GLEAN_10003774	blue	573.133	CLIP1	linker protein	#N/A	#N/A	#N/A
Lateolabrax_maculatus_GLEAN_10014440	blue	573.011	USF2	Upstream transcription factor 2, c-fos interacting	#N/A	#N/A	#N/A
Lateolabrax_maculatus_GLEAN_10013496	blue	572.961	TOM1L2	Target of myb1-like 2 (chicken)	#N/A	#N/A	#N/A
Lateolabrax_maculatus_GLEAN_10016536	blue	572.694	ESYT1	Extended synaptotagmin-like protein 1a	#N/A	#N/A	#N/A
Lateolabrax_maculatus_GLEAN_10007522	blue	572.659	PLEKHG4B	Pleckstrin homology domain containing, family G (with RhoGef domain) member 4B	#N/A	#N/A	#N/A
Lateolabrax_maculatus_GLEAN_10017200	blue	572.567	ARGLU1	Arginine and	#N/A	#N/A	#N/A
Lateolabrax_maculatus_GLEAN_10002427	blue	572.39	DIS3L2	3'-5'-exoribonuclease that specifically recognizes RNAs polyuridylated at their 3' end and mediates their degradation. Component of an exosome-independent RNA degradation pathway that mediates degradation of both mRNAs and miRNAs that have been polyuridylated by a terminal uridylyltransferase. Essential for correct mitosis, and negatively regulates cell proliferation	#N/A	#N/A	#N/A
Lateolabrax_maculatus_GLEAN_10011576	blue	572.193	COL27A1	Collagen, type XXVII, alpha	#N/A	#N/A	0.04
Lateolabrax_maculatus_GLEAN_10001855	blue	572.134	HSPG2	heparan sulfate proteoglycan	#N/A	#N/A	#N/A
Lateolabrax_maculatus_GLEAN_10018719	blue	571.402	RBM6	RNA binding motif protein 6	#N/A	#N/A	#N/A
Lateolabrax_maculatus_GLEAN_10002654	blue	571.161	rnf213	Ring finger protein 213b	#N/A	#N/A	#N/A
Lateolabrax_maculatus_GLEAN_10016238	blue	571.052	UBE3B	Ubiquitin protein ligase E3B	#N/A	#N/A	#N/A
Lateolabrax_maculatus_GLEAN_10016882	blue	570.727	BYE1	nucleic acid-templated transcription	#N/A	#N/A	#N/A
Lateolabrax_maculatus_GLEAN_10015853	blue	570.186	IQSEC2	IQ motif and SEC7	#N/A	#N/A	#N/A
Lateolabrax_maculatus_GLEAN_10011339	blue	570.17	HK1	Belongs to the hexokinase family	#N/A	#N/A	#N/A
Lateolabrax_maculatus_GLEAN_10015667	blue	570.099	TPM4	Tropomyosin like	#N/A	#N/A	#N/A
Lateolabrax_maculatus_GLEAN_10018189	blue	570.073	OGT	O-linked N-acetylglucosamine (GlcNAc) transferase, tandem duplicate 1	#N/A	#N/A	#N/A
Lateolabrax_maculatus_GLEAN_10004620	blue	570.028	ACAN	Aggrecan	#N/A	#N/A	#N/A
Lateolabrax_maculatus_GLEAN_10000965	blue	569.932	HERC1	E3 ubiquitin-protein ligase	#N/A	#N/A	#N/A
Lateolabrax_maculatus_GLEAN_10011286	blue	569.837	-	Tankyrase binding protein C terminal domain	#N/A	#N/A	#N/A
Lateolabrax_maculatus_GLEAN_10014725	blue	569.192	CAB39	Calcium binding protein 39	#N/A	#N/A	#N/A
Lateolabrax_maculatus_GLEAN_10003133	blue	568.721	PLEKHA5	pleckstrin homology domain-containing family A member	#N/A	#N/A	#N/A
Lateolabrax_maculatus_GLEAN_10002189	blue	568.703	CALD1	caldesmon 1	#N/A	#N/A	0.04
Lateolabrax_maculatus_GLEAN_10005976	blue	568.115	APLP1	Amyloid beta (A4) precursor-like protein 1	#N/A	#N/A	#N/A
Lateolabrax_maculatus_GLEAN_10005765	blue	567.997	JAK2	Janus kinase 2a	#N/A	#N/A	#N/A
Lateolabrax_maculatus_GLEAN_10017946	blue	567.833	ZNF831	Zinc finger protein 831	#N/A	#N/A	#N/A
Lateolabrax_maculatus_GLEAN_10014730	blue	567.706	PIK3CB	Phosphoinositide-3-kinase, catalytic, beta polypeptide	#N/A	#N/A	#N/A
Lateolabrax_maculatus_GLEAN_10009852	blue	567.471	FLI1	Friend leukemia integration	#N/A	#N/A	#N/A
Lateolabrax_maculatus_GLEAN_10003455	blue	567.39	COL4A1	Belongs to the type IV collagen family	#N/A	#N/A	0.04
Lateolabrax_maculatus_GLEAN_10012079	blue	567.221	BMP1	bone morphogenetic protein	#N/A	#N/A	#N/A
Lateolabrax_maculatus_GLEAN_10013425	blue	567.214	ANKIB1	Ankyrin repeat and IBR	#N/A	#N/A	#N/A
Lateolabrax_maculatus_GLEAN_10008905	blue	567.158	AGBL5	ATP GTP binding protein-like 5	#N/A	#N/A	#N/A
Lateolabrax_maculatus_GLEAN_10018282	blue	567.019	DSP	Desmoplakin	#N/A	#N/A	#N/A
Lateolabrax_maculatus_GLEAN_10008461	blue	566.951	NCAM1	Neural cell adhesion molecule	#N/A	#N/A	0.04
Lateolabrax_maculatus_GLEAN_10013034	blue	565.738	ZFHX3	Zinc finger homeobox	#N/A	#N/A	#N/A
Lateolabrax_maculatus_GLEAN_10010818	blue	565.209	GDI1	Regulates the GDP GTP exchange reaction of most RAB proteins by inhibiting the dissociation of GDP from them, and the subsequent binding of GTP	#N/A	#N/A	#N/A
Lateolabrax_maculatus_GLEAN_10018975	blue	565.034	MAN1B1	Mannosidase, alpha, class 1B, member 1	#N/A	#N/A	#N/A
Lateolabrax_maculatus_GLEAN_10016939	blue	564.691	SEMA6C	Sema domain, transmembrane domain (TM), and cytoplasmic domain, (semaphorin)	#N/A	#N/A	#N/A
Lateolabrax_maculatus_GLEAN_10016726	blue	564.521	ARHGEF4	Rho guanine nucleotide exchange factor	#N/A	#N/A	#N/A
Lateolabrax_maculatus_GLEAN_10011416	blue	564.515	MPP5	MAGUK p55 subfamily member	#N/A	#N/A	#N/A
Lateolabrax_maculatus_GLEAN_10004658	blue	564.496	MROH1	Maestro heat-like repeat family member 1	#N/A	#N/A	0.04
Lateolabrax_maculatus_GLEAN_10016997	blue	564.311	MAP1S	Microtubule-associated protein	#N/A	#N/A	#N/A
Lateolabrax_maculatus_GLEAN_10017644	blue	564.105	CNKSR3	Connector enhancer of kinase suppressor of ras	#N/A	#N/A	#N/A
Lateolabrax_maculatus_GLEAN_10003733	blue	563.44	P4HA2	Procollagen-proline, 2-oxoglutarate 4-dioxygenase (proline 4-hydroxylase), alpha polypeptide 2	#N/A	#N/A	#N/A
Lateolabrax_maculatus_GLEAN_10018643	blue	563.287	IARS	Belongs to the class-I aminoacyl-tRNA synthetase family	#N/A	#N/A	#N/A
Lateolabrax_maculatus_GLEAN_10009313	blue	563.016	FXR1	Fragile X mental retardation	#N/A	#N/A	#N/A
Lateolabrax_maculatus_GLEAN_10018193	blue	562.902	znf711	Zinc finger protein 711	#N/A	#N/A	#N/A
Lateolabrax_maculatus_GLEAN_10017812	blue	562.721	tmem63b	Transmembrane protein 63Ba	#N/A	#N/A	#N/A
Lateolabrax_maculatus_GLEAN_10005730	blue	562.625	pbxip1	pre-B-cell leukemia homeobox interacting protein 1b	#N/A	#N/A	#N/A
Lateolabrax_maculatus_GLEAN_10015959	blue	562.6	SH3KBP1	SH3-domain kinase binding protein 1	#N/A	#N/A	#N/A
Lateolabrax_maculatus_GLEAN_10015879	blue	562.567	KDM5B	Lysine (K)-specific demethylase 5Bb	#N/A	#N/A	#N/A
Lateolabrax_maculatus_GLEAN_10011726	blue	562.033	BRWD3	Bromodomain and WD	#N/A	#N/A	#N/A
Lateolabrax_maculatus_GLEAN_10008576	blue	562.007	CLEC16A	C-type lectin domain family 16, member A	#N/A	#N/A	#N/A
Lateolabrax_maculatus_GLEAN_10016022	blue	560.031	MAP3K7	protein kinase kinase kinase	#N/A	#N/A	#N/A
Lateolabrax_maculatus_GLEAN_10005977	blue	559.575	ST14	SEA domain	#N/A	#N/A	#N/A
Lateolabrax_maculatus_GLEAN_10008432	blue	559.261	DOCK10	dedicator of cytokinesis	#N/A	#N/A	#N/A
Lateolabrax_maculatus_GLEAN_10017583	blue	558.389	FMN1	Formin 1	#N/A	#N/A	0.04
Lateolabrax_maculatus_GLEAN_10008424	blue	558.261	DSCAML1	Down syndrome cell adhesion	#N/A	#N/A	#N/A
Lateolabrax_maculatus_GLEAN_10003146	blue	558.209	STXBP5	Syntaxin binding protein 5b (tomosyn)	#N/A	#N/A	#N/A
Lateolabrax_maculatus_GLEAN_10003752	blue	557.28	CPD	Carboxypeptidase D	#N/A	#N/A	#N/A
Lateolabrax_maculatus_GLEAN_10001858	blue	557.128	TIAM1	T-cell lymphoma invasion and metastasis 1a	#N/A	#N/A	#N/A
Lateolabrax_maculatus_GLEAN_10011832	blue	557.094	-	-	#N/A	#N/A	#N/A
Lateolabrax_maculatus_GLEAN_10007735	blue	556.988	RNF213	E3 ubiquitin-protein ligase RNF213-like	#N/A	#N/A	#N/A
Lateolabrax_maculatus_GLEAN_10008452	blue	556.712	ARHGEF12	Rho guanine nucleotide exchange factor	#N/A	#N/A	#N/A
Lateolabrax_maculatus_GLEAN_10001890	blue	556.71	DGKD	Diacylglycerol kinase, delta	#N/A	#N/A	#N/A
Lateolabrax_maculatus_GLEAN_10010110	blue	556.513	MID1	Midline 1	#N/A	#N/A	#N/A
Lateolabrax_maculatus_GLEAN_10011277	blue	556.451	TACC1	Transforming, acidic coiled-coil containing protein 1	#N/A	#N/A	#N/A
Lateolabrax_maculatus_GLEAN_10007017	blue	556.317	TBC1D10B	TBC1 domain family member	#N/A	#N/A	#N/A
Lateolabrax_maculatus_GLEAN_10009640	blue	556.301	PIK3R5	regulatory subunit	#N/A	#N/A	#N/A
Lateolabrax_maculatus_GLEAN_10000443	blue	555.957	LDB1	LIM domain-binding protein	#N/A	#N/A	#N/A
Lateolabrax_maculatus_GLEAN_10017105	blue	555.767	ppp2r5c	Serine threonine-protein phosphatase 2A 56 kDa regulatory subunit gamma	#N/A	#N/A	#N/A
Lateolabrax_maculatus_GLEAN_10010936	blue	555.577	DIDO1	Death inducer-obliterator 1	#N/A	#N/A	#N/A
Lateolabrax_maculatus_GLEAN_10006783	blue	555.352	-	APC membrane recruitment protein 2-like	#N/A	#N/A	#N/A
Lateolabrax_maculatus_GLEAN_10011181	blue	555.226	ITGB3	integrin	#N/A	#N/A	#N/A
Lateolabrax_maculatus_GLEAN_10017785	blue	555.168	GOLGA4	Golgin subfamily A member	#N/A	#N/A	#N/A
Lateolabrax_maculatus_GLEAN_10017775	blue	555.038	MAP3K4	protein kinase kinase kinase 4	#N/A	#N/A	#N/A
Lateolabrax_maculatus_GLEAN_10016946	blue	554.628	ENSA	Protein phosphatase inhibitor that specifically inhibits protein phosphatase 2A (PP2A) during mitosis	#N/A	#N/A	#N/A
Lateolabrax_maculatus_GLEAN_10009058	blue	554.552	kin-16	Belongs to the protein kinase superfamily. Tyr protein kinase family. CSF-1 PDGF receptor subfamily	#N/A	#N/A	0.04
Lateolabrax_maculatus_GLEAN_10012500	blue	554.329	ANKUB1	Ankyrin repeat and ubiquitin domain containing 1	#N/A	#N/A	#N/A
Lateolabrax_maculatus_GLEAN_10011325	blue	554.291	KCTD3	Potassium channel tetramerisation domain containing 3	#N/A	#N/A	#N/A
Lateolabrax_maculatus_GLEAN_10004183	blue	554.053	znf654	Zinc finger protein	#N/A	#N/A	#N/A
Lateolabrax_maculatus_GLEAN_10004621	blue	553.847	ppip5k1	Belongs to the histidine acid phosphatase family	#N/A	#N/A	#N/A
Lateolabrax_maculatus_GLEAN_10015688	blue	553.844	OSBPL9	Belongs to the OSBP family	#N/A	#N/A	#N/A
Lateolabrax_maculatus_GLEAN_10002957	blue	552.992	CDK19	Cyclin-dependent kinase 19	#N/A	0.04	0.04
Lateolabrax_maculatus_GLEAN_10016902	blue	552.826	2022-09-07	Belongs to the TRAFAC class TrmE-Era-EngA-EngB-Septin- like GTPase superfamily. Septin GTPase family	#N/A	#N/A	#N/A
Lateolabrax_maculatus_GLEAN_10004567	blue	552.756	-	High affinity choline transporter 1-like	#N/A	#N/A	#N/A
Lateolabrax_maculatus_GLEAN_10022917	blue	552.633	TINAGL1	Tubulointerstitial nephritis antigen-like	#N/A	#N/A	0.04
Lateolabrax_maculatus_GLEAN_10011450	blue	552.44	SPAG9	Sperm associated antigen	#N/A	#N/A	#N/A
Lateolabrax_maculatus_GLEAN_10009055	blue	552.378	-	Ligand of numb-protein X 2b	#N/A	#N/A	#N/A
Lateolabrax_maculatus_GLEAN_10002057	blue	552.135	SUN1	Sad1 and UNC84 domain containing 1	#N/A	#N/A	#N/A
Lateolabrax_maculatus_GLEAN_10010891	blue	552.035	GRIPAP1	GRIP1 associated protein 1	#N/A	#N/A	#N/A
Lateolabrax_maculatus_GLEAN_10012192	blue	551.994	SNX33	Sorting nexin 33	#N/A	#N/A	#N/A
Lateolabrax_maculatus_GLEAN_10011562	blue	551.828	FAM73B	Family with sequence similarity 73, member B	#N/A	#N/A	#N/A
Lateolabrax_maculatus_GLEAN_10014914	blue	551.604	USP15	Ubiquitin specific peptidase 15	#N/A	#N/A	#N/A
Lateolabrax_maculatus_GLEAN_10010077	blue	551.527	EHBP1	EH domain binding protein 1	#N/A	#N/A	#N/A
Lateolabrax_maculatus_GLEAN_10001158	blue	551.217	ERBB2	V-erb-b2 erythroblastic leukemia viral oncogene homolog 2, neuro glioblastoma derived oncogene homolog	#N/A	#N/A	#N/A
Lateolabrax_maculatus_GLEAN_10017754	blue	551.067	COL21A1	collagen	#N/A	#N/A	#N/A
Lateolabrax_maculatus_GLEAN_10001922	blue	550.85	RABGAP1L	RAB GTPase activating protein	#N/A	#N/A	#N/A
Lateolabrax_maculatus_GLEAN_10011317	blue	550.397	PTPRA	Protein tyrosine phosphatase, receptor type, A	#N/A	#N/A	#N/A
Lateolabrax_maculatus_GLEAN_10002414	blue	549.832	LPIN3	Phosphatidate phosphatase LPIN2-like isoform X1	#N/A	#N/A	#N/A
Lateolabrax_maculatus_GLEAN_10011373	blue	549.737	U2SURP	U2 snRNP-associated SURP	#N/A	#N/A	#N/A
Lateolabrax_maculatus_GLEAN_10014546	blue	549.614	ZBTB33	Zinc finger and BTB domain containing 33	#N/A	#N/A	#N/A
Lateolabrax_maculatus_GLEAN_10017943	blue	549.428	FAM120A	Family with sequence similarity 120A	#N/A	#N/A	#N/A
Lateolabrax_maculatus_GLEAN_10003278	blue	549.261	EML4	Echinoderm microtubule associated protein like 4	#N/A	#N/A	#N/A
Lateolabrax_maculatus_GLEAN_10006741	blue	548.954	HIPK3	Homeodomain interacting protein kinase 3b	#N/A	#N/A	#N/A
Lateolabrax_maculatus_GLEAN_10015837	blue	548.67	-	Coiled-coil domain-containing protein 50 N-terminus	#N/A	#N/A	#N/A
Lateolabrax_maculatus_GLEAN_10009389	blue	548.419	REXO1	RNA exonuclease 1 homolog	#N/A	#N/A	#N/A
Lateolabrax_maculatus_GLEAN_10010027	blue	547.439	FREM1	extracellular matrix	#N/A	#N/A	#N/A
Lateolabrax_maculatus_GLEAN_10017301	blue	547.43	PIK3CD	Phosphatidylinositol 4,5-bisphosphate 3-kinase catalytic subunit delta	#N/A	#N/A	#N/A
Lateolabrax_maculatus_GLEAN_10016382	blue	547.121	STK38	serine threonine kinase	#N/A	#N/A	#N/A
Lateolabrax_maculatus_GLEAN_10011706	blue	546.585	ARHGAP35	Rho GTPase activating protein 35b	#N/A	#N/A	#N/A
Lateolabrax_maculatus_GLEAN_10004108	blue	546.216	TULP4	Tubby like protein 4a	#N/A	#N/A	#N/A
Lateolabrax_maculatus_GLEAN_10003566	blue	546.069	ADCY2	Belongs to the adenylyl cyclase class-4 guanylyl cyclase family	#N/A	#N/A	#N/A
Lateolabrax_maculatus_GLEAN_10010745	blue	545.746	VPS13C	Vacuolar protein sorting 13 homolog C (S. cerevisiae)	#N/A	#N/A	#N/A
Lateolabrax_maculatus_GLEAN_10001452	blue	544.842	SEMA3B	Sema domain, immunoglobulin domain (Ig), short basic domain, secreted, (semaphorin) 3B	#N/A	#N/A	0.04
Lateolabrax_maculatus_GLEAN_10010121	blue	544.757	PTPN14	phosphatase, non-receptor type	#N/A	#N/A	#N/A
Lateolabrax_maculatus_GLEAN_10011493	blue	544.737	COBL	Cordon-bleu homolog (mouse)	#N/A	#N/A	#N/A
Lateolabrax_maculatus_GLEAN_10009545	blue	544.4	ADAMTS14	ADAM metallopeptidase with thrombospondin type 1 motif 14	#N/A	#N/A	#N/A
Lateolabrax_maculatus_GLEAN_10009562	blue	544.39	ATP10A	Belongs to the cation transport ATPase (P-type) (TC 3.A.3) family. Type IV subfamily	#N/A	#N/A	0.04
Lateolabrax_maculatus_GLEAN_10019050	blue	544.358	RAD9B	Cell cycle checkpoint control protein	#N/A	#N/A	#N/A
Lateolabrax_maculatus_GLEAN_10004281	blue	544.247	SYDE1	Synapse defective 1, Rho GTPase, homolog 1 (C. elegans)	#N/A	#N/A	#N/A
Lateolabrax_maculatus_GLEAN_10015118	blue	543.876	DACT1	Dapper homolog 1	#N/A	#N/A	#N/A
Lateolabrax_maculatus_GLEAN_10008084	blue	542.454	SREK1	Splicing regulatory glutamine lysine-rich protein	#N/A	#N/A	#N/A
Lateolabrax_maculatus_GLEAN_10012529	blue	542.194	ITGB4	integrin	#N/A	#N/A	#N/A
Lateolabrax_maculatus_GLEAN_10022861	blue	542.19	MADD	DEATH domain	#N/A	#N/A	#N/A
Lateolabrax_maculatus_GLEAN_10011889	blue	542.076	C5orf15	Chromosome 5 open reading frame 15	#N/A	#N/A	#N/A
Lateolabrax_maculatus_GLEAN_10009491	blue	541.698	col6a6	collagen	#N/A	#N/A	0.04
Lateolabrax_maculatus_GLEAN_10016526	blue	541.556	RARG	Retinoic acid receptor	#N/A	#N/A	#N/A
Lateolabrax_maculatus_GLEAN_10002233	blue	541.509	KLF5	Kruppel-like factor 5 like	#N/A	#N/A	#N/A
Lateolabrax_maculatus_GLEAN_10012486	blue	541.407	ARMC9	Armadillo repeat containing 9	#N/A	#N/A	#N/A
Lateolabrax_maculatus_GLEAN_10006478	blue	541.255	PDE8A	High affinity cAMP-specific and IBMX-insensitive 3',5'-cyclic phosphodiesterase	#N/A	#N/A	#N/A
Lateolabrax_maculatus_GLEAN_10001174	blue	541.169	ARHGEF37	Rho guanine nucleotide exchange factor	#N/A	#N/A	#N/A
Lateolabrax_maculatus_GLEAN_10005717	blue	541.047	ZNF687	Zinc finger protein	#N/A	#N/A	#N/A
Lateolabrax_maculatus_GLEAN_10015352	blue	540.165	DNAJA1	homolog subfamily A member 1	#N/A	#N/A	#N/A
Lateolabrax_maculatus_GLEAN_10018463	blue	539.967	SEMA6A	Sema domain, transmembrane domain (TM), and cytoplasmic domain, (semaphorin) 6A	#N/A	#N/A	#N/A
Lateolabrax_maculatus_GLEAN_10011575	blue	539.721	CDK5RAP2	CDK5 regulatory subunit associated protein 2	#N/A	#N/A	#N/A
Lateolabrax_maculatus_GLEAN_10013044	blue	539.711	myo1e	Belongs to the TRAFAC class myosin-kinesin ATPase superfamily. Myosin family	#N/A	#N/A	#N/A
Lateolabrax_maculatus_GLEAN_10017217	blue	539.505	CCDC93	Coiled-coil domain containing 93	#N/A	#N/A	#N/A
Lateolabrax_maculatus_GLEAN_10013043	blue	539.479	MTMR10	Myotubularin related protein 10	#N/A	#N/A	#N/A
Lateolabrax_maculatus_GLEAN_10017780	blue	539.338	STON1	General transcription factor IIA, 1-like	#N/A	#N/A	#N/A
Lateolabrax_maculatus_GLEAN_10002268	blue	539.128	ANTXRL	Anthrax toxin receptor	#N/A	#N/A	#N/A
Lateolabrax_maculatus_GLEAN_10002634	blue	539.062	AFAP1	Actin filament associated protein 1	#N/A	#N/A	#N/A
Lateolabrax_maculatus_GLEAN_10000886	blue	539.023	SSH3	Slingshot protein phosphatase 3	#N/A	#N/A	#N/A
Lateolabrax_maculatus_GLEAN_10003901	blue	538.708	RBFOX2	RNA binding protein fox-1 homolog	#N/A	#N/A	0.04
Lateolabrax_maculatus_GLEAN_10011640	blue	538.41	olfml2b	Olfactomedin-like	#N/A	#N/A	#N/A
Lateolabrax_maculatus_GLEAN_10004324	blue	538.37	MIA3	Melanoma inhibitory activity family, member 3	#N/A	#N/A	#N/A
Lateolabrax_maculatus_GLEAN_10013774	blue	538.213	ENG	Endoglin	#N/A	#N/A	#N/A
Lateolabrax_maculatus_GLEAN_10012645	blue	538.048	SLC6A6	Sodium- and chloride-dependent taurine transporter-like	#N/A	#N/A	#N/A
Lateolabrax_maculatus_GLEAN_10002532	blue	537.91	-	Belongs to the neuropilin family	#N/A	#N/A	0.04
Lateolabrax_maculatus_GLEAN_10011003	blue	537.879	PLEKHG2	Pleckstrin homology domain containing, family G (with RhoGef domain) member 2	#N/A	#N/A	#N/A
Lateolabrax_maculatus_GLEAN_10015279	blue	537.75	DLG1	large homolog	#N/A	#N/A	#N/A
Lateolabrax_maculatus_GLEAN_10017749	blue	537.479	MLIP	Muscular LMNA-interacting protein	#N/A	#N/A	#N/A
Lateolabrax_maculatus_GLEAN_10004871	blue	537.451	hook2	Hook homolog 2	#N/A	#N/A	#N/A
Lateolabrax_maculatus_GLEAN_10012120	blue	537.39	DPYSL2	Dihydropyrimidinase-related protein	#N/A	#N/A	#N/A
Lateolabrax_maculatus_GLEAN_10018040	blue	537.213	DDX26B	DEAD H (Asp-Glu-Ala-Asp His) box polypeptide 26B	#N/A	#N/A	#N/A
Lateolabrax_maculatus_GLEAN_10010135	blue	536.707	DAAM1	activator of morphogenesis	#N/A	#N/A	#N/A
Lateolabrax_maculatus_GLEAN_10004086	blue	536.585	ATP11A	Belongs to the cation transport ATPase (P-type) (TC 3.A.3) family. Type IV subfamily	#N/A	#N/A	#N/A
Lateolabrax_maculatus_GLEAN_10010677	blue	535.901	CILP2	Cartilage intermediate layer protein	#N/A	0.04	0.04
Lateolabrax_maculatus_GLEAN_10006805	blue	535.761	-	SH3 domain containing 19	#N/A	#N/A	#N/A
Lateolabrax_maculatus_GLEAN_10001798	blue	535.506	CELF2	Cugbp, Elav-like family member	#N/A	#N/A	#N/A
Lateolabrax_maculatus_GLEAN_10004009	blue	535.475	CAMK2G	Calcium calmodulin-dependent protein kinase	#N/A	#N/A	#N/A
Lateolabrax_maculatus_GLEAN_10014600	blue	534.581	UACA	Uveal autoantigen with coiled-coil domains and ankyrin	#N/A	#N/A	#N/A
[truncated: 14,865 more rows]
