# Supplementary material for: Transcriptomic Modulation Reveals the Specific Cellular Response in Chinese Sea Bass (Lateolabrax maculatus) Gills under Salinity Change and Alkalinity Stress
Source: Int J Mol Sci. 2023 Mar 20;24(6):5877. doi: 10.3390/ijms24065877 (PMC10056482; doi:10.3390/ijms24065877)
Supplement: Supplementary file 1 [file ijms-24-05877-s001.zip › Table S4.SRM-DEG Corelation.xls]

## Sheet: salinity_alkalinity
color	module size	NO.genes	alkalinity up					salinity down					alkalinity down					salinity up
			NO.DEGs	NO.DEGs in the module	ratio	Pvalue	FDR	NO.DEGs	NO.DEGs in the module	ratio	Pvalue	FDR	NO.DEGs	NO.DEGs in the module	ratio	Pvalue	FDR	NO.DEGs	NO.DEGs in the module	ratio	Pvalue	FDR
red	1601	16864	677	90	0.0562149	0.000621227	0.00341675	125	21	0.0131168	0.00694743	0.0764217	242	8	0.00499688	0.999949	1	82	11	0.00687071	0.152241	0.558217
brown	2355	16864	677	154	0.0653928	2.12719e-10	2.33991e-09	125	28	0.0118896	0.0069042	0.0764217	242	2	0.000849257	1	1	82	6	0.00254777	0.979242	1
blue	2938	16864	677	254	0.0864534	3.56902e-37	7.85185e-36	125	29	0.00987066	0.0595523	0.26203	242	0	0	1	1	82	0	0	1	1
pink	581	16864	677	53	0.091222	2.10656e-08	1.54481e-07	125	3	0.00516351	0.809551	1	242	0	0	1	1	82	0	0	1	1
royalblue	122	16864	677	0	0	1	1	125	1	0.00819672	0.597856	1	242	32	0.262295	1.06255e-31	2.33761e-30	82	0	0	1	1
magenta	530	16864	677	1	0.00188679	1	1	125	5	0.00943396	0.356876	1	242	49	0.0924528	5.82981e-26	6.4128e-25	82	0	0	1	1
lightgreen	185	16864	677	0	0	1	1	125	1	0.00540541	0.749417	1	242	16	0.0864865	1.05619e-08	7.74543e-08	82	1	0.00540541	0.59615	1
darkred	117	16864	677	0	0	1	1	125	0	0	1	1	242	8	0.0683761	0.000284744	0.00104406	82	0	0	1	1
salmon	327	16864	677	1	0.0030581	0.999999	1	125	0	0	1	1	242	15	0.0458716	7.98037e-05	0.00043892	82	7	0.0214067	0.0010588	0.00776451
purple	509	16864	677	7	0.0137525	0.999873	1	125	2	0.00392927	0.894813	1	242	19	0.0373281	0.000144653	0.000636475	82	10	0.0196464	0.000175124	0.00192636
lightyellow	137	16864	677	0	0	1	1	125	1	0.00729927	0.640631	1	242	6	0.0437956	0.0142145	0.044674	82	0	0	1	1
cyan	302	16864	677	5	0.0165563	0.994128	1	125	1	0.00331126	0.896399	1	242	4	0.013245	0.632732	1	82	9	0.0298013	1.56756e-05	0.000344862
yellow	1814	16864	677	35	0.0192944	1	1	125	5	0.00275634	0.998238	1	242	29	0.0159868	0.29622	0.724093	82	13	0.00716648	0.0985851	0.447118
black	1331	16864	677	43	0.0323065	0.947722	1	125	17	0.0127724	0.0190657	0.139815	242	12	0.00901578	0.972693	1	82	5	0.00375657	0.785264	1
darkgreen	104	16864	677	1	0.00961538	0.986081	1	125	3	0.0288462	0.0421756	0.231966	242	0	0	1	1	82	0	0	1	1
darkturquoise	71	16864	677	0	0	1	1	125	1	0.0140845	0.411002	1	242	2	0.028169	0.271225	0.724093	82	0	0	1	1
green	1699	16864	677	15	0.00882872	1	1	125	2	0.00117716	0.999975	1	242	25	0.0147145	0.478648	0.957297	82	9	0.00529723	0.445781	1
greenyellow	383	16864	677	2	0.00522193	0.999998	1	125	3	0.0078329	0.542761	1	242	0	0	1	1	82	0	0	1	1
grey60	189	16864	677	4	0.021164	0.948476	1	125	0	0	1	1	242	2	0.010582	0.757491	1	82	1	0.00529101	0.604034	1
lightcyan	230	16864	677	0	0	1	1	125	0	0	1	1	242	1	0.00434783	0.964824	1	82	3	0.0130435	0.101618	0.447118
midnightblue	258	16864	677	0	0	1	1	125	1	0.00387597	0.855476	1	242	1	0.00387597	0.976671	1	82	0	0	1	1
tan	381	16864	677	1	0.00262467	1	1	125	0	0	1	1	242	6	0.015748	0.466958	0.957297	82	3	0.00787402	0.282916	0.889164
turquoise	700	16864	677	11	0.0157143	0.999952	1	125	1	0.00142857	0.995104	1	242	5	0.00714286	0.974632	1	82	4	0.00571429	0.444508	1
