# Supplementary material for: Transcriptomic Modulation Reveals the Specific Cellular Response in Chinese Sea Bass (Lateolabrax maculatus) Gills under Salinity Change and Alkalinity Stress
Source: Int J Mol Sci. 2023 Mar 20;24(6):5877. doi: 10.3390/ijms24065877 (PMC10056482; doi:10.3390/ijms24065877)
Supplement: Supplementary file 1 [file ijms-24-05877-s001.zip › Table S6.SRM GO.xlsx]

## Sheet: Sheet1
module color	ID	Term	Class	Pvalue	GOlevl
red (1601)-alka up-sali down	GO:0005667	transcription regulator complex	CC	0.000464907	3
	GO:0019725	cellular homeostasis	BP	0.00130316	3
	GO:0003823	antigen binding	MF	0.00256321	3
	GO:0048646	anatomical structure formation involved in morphogenesis	BP	0.00379079	3
	GO:0005815	microtubule organizing center	CC	0.00492352	3
	GO:0030371	translation repressor activity	MF	0.00584959	3
	GO:0048870	cell motility	BP	0.00619721	3
	GO:0051674	localization of cell	BP	0.00619721	3
	GO:0065008	regulation of biological quality	BP	0.0108319	3
	GO:0048771	tissue remodeling	BP	0.0120338	3
	GO:0061783	peptidoglycan muralytic activity	MF	0.0149595	3
	GO:0006950	response to stress	BP	0.0185307	3
	GO:0040012	regulation of locomotion	BP	0.0258979	3
	GO:0048524	positive regulation of viral process	BP	0.0284864	3
	GO:0001503	ossification	BP	0.0379223	3
	GO:0051172	negative regulation of nitrogen compound metabolic process	BP	0.000821297	4
	GO:0032606	type I interferon production	BP	0.000894345	4
	GO:0031324	negative regulation of cellular metabolic process	BP	0.00112995	4
	GO:0042592	homeostatic process	BP	0.00119406	4
	GO:0002221	pattern recognition receptor signaling pathway	BP	0.00122932	4
	GO:0016229	steroid dehydrogenase activity	MF	0.00285137	4
	GO:0090575	RNA polymerase II transcription regulator complex	CC	0.00491969	4
	GO:0035459	vesicle cargo loading	BP	0.00523893	4
	GO:0055082	cellular chemical homeostasis	BP	0.00533639	4
	GO:0045137	development of primary sexual characteristics	BP	0.005353	4
	GO:0016477	cell migration	BP	0.0078658	4
	GO:0003205	cardiac chamber development	BP	0.0108562	4
	GO:0003916	DNA topoisomerase activity	MF	0.0149595	4
	GO:0008933	lytic transglycosylase activity	MF	0.0149595	4
	GO:0007548	sex differentiation	BP	0.015163	4
	GO:0032481	positive regulation of type I interferon production	BP	0.000104225	5
	GO:0048878	chemical homeostasis	BP	0.000162847	5
	GO:0032479	regulation of type I interferon production	BP	0.00066321	5
	GO:0033764	steroid dehydrogenase activity, acting on the CH-OH group of donors, NAD or NADP as acceptor	MF	0.00123561	5
	GO:0002224	toll-like receptor signaling pathway	BP	0.00131826	5
	GO:0006873	cellular ion homeostasis	BP	0.00155888	5
	GO:0032386	regulation of intracellular transport	BP	0.00974791	5
	GO:0045934	negative regulation of nucleobase-containing compound metabolic process	BP	0.010615	5
	GO:0070391	response to lipoteichoic acid	BP	0.0106207	5
	GO:0072088	nephron epithelium morphogenesis	BP	0.0112612	5
	GO:0030334	regulation of cell migration	BP	0.012039	5
	GO:0007052	mitotic spindle organization	BP	0.0122289	5
	GO:0060485	mesenchyme development	BP	0.0126349	5
	GO:0016057	regulation of membrane potential in photoreceptor cell	BP	0.0149595	5
	GO:0032608	interferon-beta production	BP	0.0149595	5
brown (2355)-alka up-sali down	GO:0043167	ion binding	MF	4.46489e-05	3
	GO:0016740	transferase activity	MF	9.27836e-05	3
	GO:0140096	catalytic activity, acting on a protein	MF	0.000115206	3
	GO:0007272	ensheathment of neurons	BP	0.000922789	3
	GO:0042995	cell projection	CC	0.00175654	3
	GO:0051050	positive regulation of transport	BP	0.00307892	3
	GO:0045321	leukocyte activation	BP	0.00478135	3
	GO:0031252	cell leading edge	CC	0.00624084	3
	GO:0016192	vesicle-mediated transport	BP	0.0074421	3
	GO:0048869	cellular developmental process	BP	0.00756256	3
	GO:0008037	cell recognition	BP	0.00760228	3
	GO:0007165	signal transduction	BP	0.0097666	3
	GO:0008219	cell death	BP	0.0102362	3
	GO:0043218	compact myelin	CC	0.0110892	3
	GO:0030029	actin filament-based process	BP	0.013411	3
	GO:0004672	protein kinase activity	MF	2.27092e-07	4
	GO:0016772	transferase activity, transferring phosphorus-containing groups	MF	1.50467e-06	4
	GO:0050839	cell adhesion molecule binding	MF	2.20766e-05	4
	GO:1903829	positive regulation of cellular protein localization	BP	9.91052e-05	4
	GO:0007166	cell surface receptor signaling pathway	BP	0.000111429	4
	GO:0043169	cation binding	MF	0.000140786	4
	GO:0006897	endocytosis	BP	0.000164669	4
	GO:0006793	phosphorus metabolic process	BP	0.000521617	4
	GO:0051128	regulation of cellular component organization	BP	0.000961244	4
	GO:0120025	plasma membrane bounded cell projection	CC	0.000973398	4
	GO:0008285	negative regulation of cell population proliferation	BP	0.00103182	4
	GO:0060627	regulation of vesicle-mediated transport	BP	0.0013619	4
	GO:0008366	axon ensheathment	BP	0.00203116	4
	GO:0045806	negative regulation of endocytosis	BP	0.0024772	4
	GO:0031047	gene silencing by RNA	BP	0.0024772	4
	GO:0007167	enzyme linked receptor protein signaling pathway	BP	2.5367e-07	5
	GO:0016301	kinase activity	MF	5.77783e-07	5
	GO:0016773	phosphotransferase activity, alcohol group as acceptor	MF	9.79795e-07	5
	GO:0043412	macromolecule modification	BP	4.58316e-05	5
	GO:0046824	positive regulation of nucleocytoplasmic transport	BP	7.51471e-05	5
	GO:0090316	positive regulation of intracellular protein transport	BP	9.91052e-05	5
	GO:1900182	positive regulation of protein localization to nucleus	BP	9.91052e-05	5
	GO:1904591	positive regulation of protein import	BP	9.91052e-05	5
	GO:0036211	protein modification process	BP	0.000101204	5
	GO:0005769	early endosome	CC	0.000116875	5
	GO:0097435	supramolecular fiber organization	BP	0.000308762	5
	GO:0009262	deoxyribonucleotide metabolic process	BP	0.000652616	5
	GO:0019692	deoxyribose phosphate metabolic process	BP	0.000652616	5
	GO:0072091	regulation of stem cell proliferation	BP	0.000757121	5
	GO:0006796	phosphate-containing compound metabolic process	BP	0.00108029	5
blue (2938)-alka up	GO:0009653	anatomical structure morphogenesis	BP	2.15072e-17	3
	GO:0071840	cellular component organization or biogenesis	BP	4.75129e-16	3
	GO:0006928	movement of cell or subcellular component	BP	7.76501e-14	3
	GO:0048856	anatomical structure development	BP	5.67156e-13	3
	GO:0042330	taxis	BP	2.49644e-12	3
	GO:0005515	protein binding	MF	1.00599e-11	3
	GO:0048869	cellular developmental process	BP	1.00766e-09	3
	GO:0005085	guanyl-nucleotide exchange factor activity	MF	7.72812e-09	3
	GO:0030234	enzyme regulator activity	MF	9.95647e-09	3
	GO:0048870	cell motility	BP	5.79627e-08	3
	GO:0051674	localization of cell	BP	5.79627e-08	3
	GO:0007275	multicellular organism development	BP	5.81053e-08	3
	GO:0016192	vesicle-mediated transport	BP	6.02847e-08	3
	GO:0140096	catalytic activity, acting on a protein	MF	7.96612e-08	3
	GO:0007155	cell adhesion	BP	9.44941e-08	3
	GO:0000902	cell morphogenesis	BP	2.37295e-19	4
	GO:0016043	cellular component organization	BP	7.74209e-18	4
	GO:0097485	neuron projection guidance	BP	5.25754e-17	4
	GO:0032989	cellular component morphogenesis	BP	1.92097e-14	4
	GO:0048468	cell development	BP	1.21356e-12	4
	GO:0006935	chemotaxis	BP	1.29539e-12	4
	GO:0004672	protein kinase activity	MF	2.27672e-12	4
	GO:0008047	enzyme activator activity	MF	4.81943e-11	4
	GO:0030154	cell differentiation	BP	1.84723e-09	4
	GO:0005088	Ras guanyl-nucleotide exchange factor activity	MF	7.98862e-09	4
	GO:0050790	regulation of catalytic activity	BP	8.55973e-09	4
	GO:0035295	tube development	BP	1.35714e-08	4
	GO:0019899	enzyme binding	MF	2.22733e-08	4
	GO:0009966	regulation of signal transduction	BP	2.89408e-08	4
	GO:0001882	nucleoside binding	MF	4.37304e-08	4
	GO:0043062	extracellular structure organization	BP	2.20973e-24	5
	GO:0030030	cell projection organization	BP	5.09671e-18	5
	GO:0048858	cell projection morphogenesis	BP	8.32977e-17	5
	GO:0032990	cell part morphogenesis	BP	8.32977e-17	5
	GO:0051020	GTPase binding	MF	1.20262e-14	5
	GO:0016773	phosphotransferase activity, alcohol group as acceptor	MF	1.08426e-13	5
	GO:0051336	regulation of hydrolase activity	BP	6.68966e-13	5
	GO:0048666	neuron development	BP	1.75231e-11	5
	GO:0022008	neurogenesis	BP	2.52046e-09	5
	GO:0036211	protein modification process	BP	3.19947e-09	5
	GO:0007399	nervous system development	BP	3.3046e-09	5
	GO:0030182	neuron differentiation	BP	8.09361e-09	5
	GO:0016301	kinase activity	MF	1.64278e-08	5
	GO:0019199	transmembrane receptor protein kinase activity	MF	1.68593e-08	5
	GO:0043412	macromolecule modification	BP	3.2893e-08	5
pink (581)-alka up	GO:0045926	negative regulation of growth	BP	0.000865221	3
	GO:0031012	extracellular matrix	CC	0.00409728	3
	GO:0007155	cell adhesion	BP	0.0147791	3
	GO:0038201	TOR complex	CC	0.0298688	3
	GO:0019827	stem cell population maintenance	BP	0.0307755	3
	GO:0098727	maintenance of cell number	BP	0.0307755	3
	GO:0043903	regulation of interspecies interactions between organisms	BP	0.0339381	3
	GO:0001776	leukocyte homeostasis	BP	0.034436	3
	GO:0000307	cyclin-dependent protein kinase holoenzyme complex	CC	0.04224	3
	GO:0006909	phagocytosis	BP	0.00150664	4
	GO:0005539	glycosaminoglycan binding	MF	0.00240653	4
	GO:0072530	purine-containing compound transmembrane transport	BP	0.00727613	4
	GO:0030308	negative regulation of cell growth	BP	0.0094764	4
	GO:0009266	response to temperature stimulus	BP	0.0115251	4
	GO:0000149	SNARE binding	MF	0.0264175	4
	GO:0045787	positive regulation of cell cycle	BP	0.0264175	4
	GO:0046624	sphingolipid transporter activity	MF	0.0277716	4
	GO:1904018	positive regulation of vasculature development	BP	0.0277716	4
	GO:0050792	regulation of viral process	BP	0.0307571	4
	GO:0031461	cullin-RING ubiquitin ligase complex	CC	0.0322424	4
	GO:0008233	peptidase activity	MF	0.03337	4
	GO:0051021	GDP-dissociation inhibitor binding	MF	0.0358464	4
	GO:0032102	negative regulation of response to external stimulus	BP	0.0373246	4
	GO:0071774	response to fibroblast growth factor	BP	0.0379662	4
	GO:0032365	intracellular lipid transport	BP	0.000769244	5
	GO:1903900	regulation of viral life cycle	BP	0.00623892	5
	GO:0051180	vitamin transport	BP	0.00754052	5
	GO:0019079	viral genome replication	BP	0.00789472	5
	GO:0070775	H3 histone acetyltransferase complex	CC	0.0107146	5
	GO:0046719	regulation by virus of viral protein levels in host cell	BP	0.0107146	5
	GO:0051119	sugar transmembrane transporter activity	MF	0.0107146	5
	GO:0019905	syntaxin binding	MF	0.0108163	5
	GO:0051020	GTPase binding	MF	0.0140127	5
	GO:0002693	positive regulation of cellular extravasation	BP	0.0147267	5
	GO:0032732	positive regulation of interleukin-1 production	BP	0.0147267	5
	GO:0007015	actin filament organization	BP	0.0157873	5
	GO:0019058	viral life cycle	BP	0.0164875	5
	GO:0070011	peptidase activity, acting on L-amino acid peptides	MF	0.0169925	5
	GO:2000177	regulation of neural precursor cell proliferation	BP	0.0192781	5
royalblue (122)-alka down	GO:0001816	cytokine production	BP	8.1601e-05	3		重要：红色都是免疫相关
	GO:0009607	response to biotic stimulus	BP	0.000116064	3
	GO:0051239	regulation of multicellular organismal process	BP	0.000154134	3
	GO:0008283	cell population proliferation	BP	0.00031121	3
	GO:0051707	response to other organism	BP	0.000362383	3
	GO:0002682	regulation of immune system process	BP	0.000515719	3
	GO:0051241	negative regulation of multicellular organismal process	BP	0.000581903	3
	GO:0045321	leukocyte activation	BP	0.000592789	3
	GO:0012505	endomembrane system	CC	0.00234946	3
	GO:0001775	cell activation	BP	0.00276941	3
	GO:0002683	negative regulation of immune system process	BP	0.00322193	3
	GO:0042221	response to chemical	BP	0.00331067	3
	GO:0043627	response to estrogen	BP	0.00395345	3
	GO:0060090	molecular adaptor activity	MF	0.0041557	3
	GO:0009058	biosynthetic process	BP	0.00425434	3
	GO:0009617	response to bacterium	BP	8.61027e-07	4
	GO:0032635	interleukin-6 production	BP	1.4962e-05	4
	GO:0001817	regulation of cytokine production	BP	2.02894e-05	4
	GO:0010033	response to organic substance	BP	4.08068e-05	4
	GO:1903706	regulation of hemopoiesis	BP	8.93793e-05	4
	GO:1901698	response to nitrogen compound	BP	0.00022745	4
	GO:0042127	regulation of cell population proliferation	BP	0.000261533	4
	GO:0043207	response to external biotic stimulus	BP	0.000424638	4
	GO:0009889	regulation of biosynthetic process	BP	0.000532099	4
	GO:0001818	negative regulation of cytokine production	BP	0.000636258	4
	GO:0046649	lymphocyte activation	BP	0.000761709	4
	GO:0006629	lipid metabolic process	BP	0.000955534	4
	GO:0001819	positive regulation of cytokine production	BP	0.00102114	4
	GO:0009896	positive regulation of catabolic process	BP	0.00156008	4
	GO:0032637	interleukin-8 production	BP	0.00161368	4
	GO:0032675	regulation of interleukin-6 production	BP	1.4962e-05	5
	GO:1902105	regulation of leukocyte differentiation	BP	2.65908e-05	5
	GO:0002237	response to molecule of bacterial origin	BP	4.06984e-05	5
	GO:0002521	leukocyte differentiation	BP	8.79222e-05	5
	GO:0016125	sterol metabolic process	BP	0.000200051	5
	GO:0010628	positive regulation of gene expression	BP	0.000206816	5
	GO:0031331	positive regulation of cellular catabolic process	BP	0.00021095	5
	GO:0046683	response to organophosphorus	BP	0.000363072	5
	GO:0045732	positive regulation of protein catabolic process	BP	0.000365805	5
	GO:0034616	response to laminar fluid shear stress	BP	0.000546525	5
	GO:0010243	response to organonitrogen compound	BP	0.000553166	5
	GO:0045637	regulation of myeloid cell differentiation	BP	0.00056277	5
	GO:0032682	negative regulation of chemokine production	BP	0.00101209	5
	GO:0001067	regulatory region nucleic acid binding	MF	0.00104039	5
	GO:0008610	lipid biosynthetic process	BP	0.00105421	5
magenta (530)-alka down	GO:0022403	cell cycle phase	BP	8.75226e-15	3
	GO:0007049	cell cycle	BP	3.50164e-11	3
	GO:0043229	intracellular organelle	CC	6.7322e-09	3
	GO:0043226	organelle	CC	3.16573e-07	3
	GO:0022402	cell cycle process	BP	7.76169e-07	3
	GO:0036094	small molecule binding	MF	9.57138e-06	3
	GO:0098687	chromosomal region	CC	5.11081e-05	3
	GO:0097367	carbohydrate derivative binding	MF	5.76168e-05	3
	GO:0006950	response to stress	BP	7.41065e-05	3
	GO:0031974	membrane-enclosed lumen	CC	0.000235136	3
	GO:0051707	response to other organism	BP	0.000268718	3
	GO:0044281	small molecule metabolic process	BP	0.000344701	3
	GO:0009607	response to biotic stimulus	BP	0.00054991	3
	GO:0009056	catabolic process	BP	0.000634016	3
	GO:0070085	glycosylation	BP	0.000812384	3
	GO:0000278	mitotic cell cycle	BP	4.88662e-16	4
	GO:0098763	mitotic cell cycle phase	BP	3.26143e-09	4
	GO:0000279	M phase	BP	5.625e-09	4
	GO:0043231	intracellular membrane-bounded organelle	CC	1.06092e-08	4
	GO:0043227	membrane-bounded organelle	CC	4.69377e-08	4
	GO:1903047	mitotic cell cycle process	BP	9.06e-07	4
	GO:0044770	cell cycle phase transition	BP	1.92186e-06	4
	GO:0033554	cellular response to stress	BP	3.8481e-06	4
	GO:0000776	kinetochore	CC	9.12664e-06	4
	GO:0000775	chromosome, centromeric region	CC	9.5904e-06	4
	GO:0001882	nucleoside binding	MF	2.02703e-05	4
	GO:0031090	organelle membrane	CC	2.13083e-05	4
	GO:0043232	intracellular non-membrane-bounded organelle	CC	0.000156447	4
	GO:0043228	non-membrane-bounded organelle	CC	0.000156447	4
	GO:0070013	intracellular organelle lumen	CC	0.000195591	4
	GO:0000087	mitotic M phase	BP	6.84556e-09	5
	GO:0044772	mitotic cell cycle phase transition	BP	1.72608e-06	5
	GO:0030163	protein catabolic process	BP	2.18009e-06	5
	GO:0006974	cellular response to DNA damage stimulus	BP	3.6944e-06	5
	GO:0001883	purine nucleoside binding	MF	1.85254e-05	5
	GO:0032549	ribonucleoside binding	MF	1.85254e-05	5
	GO:0005634	nucleus	CC	2.91508e-05	5
	GO:0031981	nuclear lumen	CC	3.8869e-05	5
	GO:0005694	chromosome	CC	5.00122e-05	5
	GO:0006996	organelle organization	BP	7.00823e-05	5
	GO:0006508	proteolysis	BP	0.000348682	5
	GO:0016818	hydrolase activity, acting on acid anhydrides, in phosphorus-containing anhydrides	MF	0.000421567	5
	GO:0030659	cytoplasmic vesicle membrane	CC	0.000452486	5
	GO:0030662	coated vesicle membrane	CC	0.000555946	5
	GO:0044265	cellular macromolecule catabolic process	BP	0.000648387	5
lightgreen (185)-alka down	GO:1990904	ribonucleoprotein complex	CC	1.01365e-08	3
	GO:0031974	membrane-enclosed lumen	CC	1.47292e-08	3
	GO:0022403	cell cycle phase	BP	4.20214e-08	3
	GO:0031975	envelope	CC	9.22616e-08	3
	GO:0043229	intracellular organelle	CC	2.12141e-07	3
	GO:0044403	symbiotic process	BP	2.87177e-07	3
	GO:0009056	catabolic process	BP	9.47295e-07	3
	GO:0009607	response to biotic stimulus	BP	1.09441e-06	3
	GO:0043226	organelle	CC	2.56061e-06	3
	GO:0051707	response to other organism	BP	4.53677e-06	3
	GO:0120114	Sm-like protein family complex	CC	1.04475e-05	3
	GO:0007049	cell cycle	BP	2.64019e-05	3
	GO:0006807	nitrogen compound metabolic process	BP	6.18209e-05	3
	GO:0044237	cellular metabolic process	BP	0.000112601	3
	GO:0000502	proteasome complex	CC	0.000237405	3
	GO:0098763	mitotic cell cycle phase	BP	9.30272e-09	4
	GO:0044248	cellular catabolic process	BP	1.06223e-08	4
	GO:0000278	mitotic cell cycle	BP	1.11309e-08	4
	GO:0070013	intracellular organelle lumen	CC	1.20127e-08	4
	GO:0000279	M phase	BP	1.33442e-08	4
	GO:0043233	organelle lumen	CC	1.47292e-08	4
	GO:0006413	translational initiation	BP	5.15664e-08	4
	GO:0031967	organelle envelope	CC	9.22616e-08	4
	GO:0043232	intracellular non-membrane-bounded organelle	CC	1.63279e-07	4
	GO:0043228	non-membrane-bounded organelle	CC	1.63279e-07	4
	GO:0003676	nucleic acid binding	MF	5.12304e-07	4
	GO:1901575	organic substance catabolic process	BP	6.4925e-07	4
	GO:0043207	response to external biotic stimulus	BP	7.66979e-07	4
	GO:0000313	organellar ribosome	CC	1.54499e-06	4
	GO:0043227	membrane-bounded organelle	CC	1.81616e-06	4
	GO:0006508	proteolysis	BP	4.10809e-13	5
	GO:0009057	macromolecule catabolic process	BP	1.79109e-10	5
	GO:0000087	mitotic M phase	BP	4.70146e-09	5
	GO:0044265	cellular macromolecule catabolic process	BP	1.98161e-08	5
	GO:0005634	nucleus	CC	8.15818e-08	5
	GO:0031981	nuclear lumen	CC	1.69294e-07	5
	GO:0030163	protein catabolic process	BP	9.37131e-07	5
	GO:0043603	cellular amide metabolic process	BP	1.41856e-06	5
	GO:0005840	ribosome	CC	3.86874e-06	5
	GO:1901566	organonitrogen compound biosynthetic process	BP	7.44138e-06	5
	GO:0019866	organelle inner membrane	CC	7.67205e-06	5
	GO:0097525	spliceosomal snRNP complex	CC	8.77588e-06	5
	GO:0006518	peptide metabolic process	BP	1.1006e-05	5
	GO:0002758	innate immune response-activating signal transduction	BP	1.80042e-05	5
	GO:0002474	antigen processing and presentation of peptide antigen via MHC class I	BP	1.84903e-05	5
darkred (117)-alka down	GO:0031974	membrane-enclosed lumen	CC	2.20591e-09	3
	GO:0022403	cell cycle phase	BP	1.0091e-07	3
	GO:0043229	intracellular organelle	CC	2.47159e-07	3
	GO:0007049	cell cycle	BP	4.40204e-07	3
	GO:0043226	organelle	CC	1.10086e-06	3
	GO:1990904	ribonucleoprotein complex	CC	1.21473e-05	3
	GO:0005654	nucleoplasm	CC	9.32694e-05	3
	GO:0031975	envelope	CC	0.000110195	3
	GO:0016604	nuclear body	CC	0.000567327	3
	GO:0120114	Sm-like protein family complex	CC	0.000796806	3
	GO:0044238	primary metabolic process	BP	0.00174689	3
	GO:0071704	organic substance metabolic process	BP	0.00317228	3
	GO:0006807	nitrogen compound metabolic process	BP	0.00348849	3
	GO:0140098	catalytic activity, acting on RNA	MF	0.00405259	3
	GO:0022402	cell cycle process	BP	0.0059417	3
	GO:0070013	intracellular organelle lumen	CC	1.83038e-09	4
	GO:0043233	organelle lumen	CC	2.20591e-09	4
	GO:0043231	intracellular membrane-bounded organelle	CC	1.70508e-07	4
	GO:0043227	membrane-bounded organelle	CC	6.16463e-07	4
	GO:0051325	interphase	BP	1.32894e-06	4
	GO:0051320	S phase	BP	1.13353e-05	4
	GO:0005681	spliceosomal complex	CC	1.39151e-05	4
	GO:0031967	organelle envelope	CC	0.000110195	4
	GO:0000278	mitotic cell cycle	BP	0.000243601	4
	GO:1901360	organic cyclic compound metabolic process	BP	0.000269242	4
	GO:0003724	RNA helicase activity	MF	0.000358468	4
	GO:0006730	one-carbon metabolic process	BP	0.000365805	4
	GO:0051236	establishment of RNA localization	BP	0.000416173	4
	GO:0034641	cellular nitrogen compound metabolic process	BP	0.000462166	4
	GO:0098763	mitotic cell cycle phase	BP	0.000515745	4
	GO:0005634	nucleus	CC	4.62698e-10	5
	GO:0031981	nuclear lumen	CC	7.71069e-10	5
	GO:0044265	cellular macromolecule catabolic process	BP	9.66348e-06	5
	GO:0003723	RNA binding	MF	2.0774e-05	5
	GO:0009057	macromolecule catabolic process	BP	4.14231e-05	5
	GO:0000087	mitotic M phase	BP	0.000382715	5
	GO:0050658	RNA transport	BP	0.000416173	5
	GO:0090304	nucleic acid metabolic process	BP	0.000431011	5
	GO:0097525	spliceosomal snRNP complex	CC	0.000720292	5
	GO:0016832	aldehyde-lyase activity	MF	0.00101209	5
	GO:0006508	proteolysis	BP	0.00124398	5
	GO:0016742	hydroxymethyl-, formyl- and related transferase activity	MF	0.00129609	5
	GO:0006974	cellular response to DNA damage stimulus	BP	0.00148052	5
	GO:0030163	protein catabolic process	BP	0.00182302	5
	GO:0010467	gene expression	BP	0.00232662	5
salmon (327)-alka down-sali up	GO:0031975	envelope	CC	1.53427e-15	3		氧化还原
	GO:1990904	ribonucleoprotein complex	CC	9.06941e-13	3
	GO:0044403	symbiotic process	BP	8.35902e-10	3
	GO:0055114	oxidation-reduction process	BP	9.71209e-10	3
	GO:0016491	oxidoreductase activity	MF	1.30652e-06	3
	GO:0009892	negative regulation of metabolic process	BP	3.28041e-05	3
	GO:0043229	intracellular organelle	CC	4.19093e-05	3
	GO:0043226	organelle	CC	6.99365e-05	3
	GO:0051641	cellular localization	BP	0.000243005	3
	GO:0009056	catabolic process	BP	0.000562751	3
	GO:0044237	cellular metabolic process	BP	0.000624729	3
	GO:0051234	establishment of localization	BP	0.00339679	3
	GO:0044238	primary metabolic process	BP	0.00867373	3
	GO:0071704	organic substance metabolic process	BP	0.0105596	3
	GO:0004601	peroxidase activity	MF	0.0123128	3
	GO:0044391	ribosomal subunit	CC	3.7104e-18	4
	GO:0031967	organelle envelope	CC	1.53427e-15	4
	GO:0022900	electron transport chain	BP	4.40352e-11	4
	GO:0016032	viral process	BP	1.3437e-08	4
	GO:0006091	generation of precursor metabolites and energy	BP	1.86767e-07	4
	GO:0016651	oxidoreductase activity, acting on NAD(P)H	MF	6.19499e-07	4
	GO:0046907	intracellular transport	BP	7.63458e-07	4
	GO:0051649	establishment of localization in cell	BP	3.34997e-06	4
	GO:0044248	cellular catabolic process	BP	3.56736e-06	4
	GO:0010605	negative regulation of macromolecule metabolic process	BP	8.6775e-06	4
	GO:0015980	energy derivation by oxidation of organic compounds	BP	1.00296e-05	4
	GO:1901575	organic substance catabolic process	BP	2.82089e-05	4
	GO:0070727	cellular macromolecule localization	BP	4.05285e-05	4
	GO:0051231	spindle elongation	BP	0.000104408	4
	GO:0034641	cellular nitrogen compound metabolic process	BP	0.000138107	4
	GO:0005840	ribosome	CC	1.07801e-17	5
	GO:0019866	organelle inner membrane	CC	1.9714e-16	5
	GO:0043603	cellular amide metabolic process	BP	2.05589e-16	5
	GO:0015934	large ribosomal subunit	CC	3.14184e-15	5
	GO:0006518	peptide metabolic process	BP	2.63951e-14	5
	GO:0022411	cellular component disassembly	BP	2.10096e-11	5
	GO:0090150	establishment of protein localization to membrane	BP	6.38938e-11	5
	GO:0003723	RNA binding	MF	1.03829e-09	5
	GO:0006886	intracellular protein transport	BP	4.97727e-09	5
	GO:0022904	respiratory electron transport chain	BP	6.43152e-09	5
	GO:0046700	heterocycle catabolic process	BP	1.31855e-08	5
	GO:0019439	aromatic compound catabolic process	BP	1.39867e-08	5
	GO:0044270	cellular nitrogen compound catabolic process	BP	1.48328e-08	5
	GO:0010629	negative regulation of gene expression	BP	2.87276e-08	5
	GO:1901361	organic cyclic compound catabolic process	BP	5.94788e-08	5
purple (509)-alka down-sali up	GO:0044281	small molecule metabolic process	BP	4.53101e-05	3
	GO:0097006	regulation of plasma lipoprotein particle levels	BP	0.0166435	3
	GO:0007631	feeding behavior	BP	0.0243247	3
	GO:0031674	I band	CC	0.0292661	3
	GO:0016787	hydrolase activity	MF	0.040173	3
	GO:0030017	sarcomere	CC	0.0402779	3
	GO:0043500	muscle adaptation	BP	0.0420252	3
	GO:0005996	monosaccharide metabolic process	BP	2.62381e-05	4
	GO:0003012	muscle system process	BP	0.00119527	4
	GO:0006082	organic acid metabolic process	BP	0.00141921	4
	GO:0051341	regulation of oxidoreductase activity	BP	0.00302115	4
	GO:0006091	generation of precursor metabolites and energy	BP	0.00447721	4
	GO:0010927	cellular component assembly involved in morphogenesis	BP	0.00577444	4
	GO:0042127	regulation of cell population proliferation	BP	0.00593512	4
	GO:0016769	transferase activity, transferring nitrogenous groups	MF	0.00798038	4
	GO:0045806	negative regulation of endocytosis	BP	0.008088	4
	GO:0005975	carbohydrate metabolic process	BP	0.010394	4
	GO:0072537	fibroblast activation	BP	0.0107063	4
	GO:0031668	cellular response to extracellular stimulus	BP	0.011806	4
	GO:0071496	cellular response to external stimulus	BP	0.011806	4
	GO:0016788	hydrolase activity, acting on ester bonds	MF	0.0120821	4
	GO:0043292	contractile fiber	CC	0.0130863	4
	GO:0044275	cellular carbohydrate catabolic process	BP	2.45902e-05	5
	GO:0043470	regulation of carbohydrate catabolic process	BP	0.000147209	5
	GO:0019318	hexose metabolic process	BP	0.000320545	5
	GO:0043471	regulation of cellular carbohydrate catabolic process	BP	0.000333606	5
	GO:0016052	carbohydrate catabolic process	BP	0.000665842	5
	GO:0043436	oxoacid metabolic process	BP	0.00121712	5
	GO:0033860	regulation of NAD(P)H oxidase activity	BP	0.00320562	5
	GO:0006936	muscle contraction	BP	0.00354593	5
	GO:0032881	regulation of polysaccharide metabolic process	BP	0.00393383	5
	GO:0015291	secondary active transmembrane transporter activity	MF	0.00457143	5
	GO:0006109	regulation of carbohydrate metabolic process	BP	0.00517733	5
	GO:0046185	aldehyde catabolic process	BP	0.00525978	5
	GO:0072521	purine-containing compound metabolic process	BP	0.00559824	5
	GO:0090257	regulation of muscle system process	BP	0.00722682	5
	GO:0031669	cellular response to nutrient levels	BP	0.00884661	5
lightyellow (137)-alka-dwon	GO:0031974	membrane-enclosed lumen	CC	1.97951e-05	3
	GO:0022403	cell cycle phase	BP	2.30871e-05	3
	GO:0019882	antigen processing and presentation	BP	4.79198e-05	3
	GO:0043229	intracellular organelle	CC	0.000310008	3
	GO:0043226	organelle	CC	0.000519879	3
	GO:0022402	cell cycle process	BP	0.00100045	3
	GO:0009056	catabolic process	BP	0.00201998	3
	GO:0022624	proteasome accessory complex	CC	0.00300809	3
	GO:0006807	nitrogen compound metabolic process	BP	0.00317462	3
	GO:0007049	cell cycle	BP	0.00377932	3
	GO:0071704	organic substance metabolic process	BP	0.00533936	3
	GO:0044238	primary metabolic process	BP	0.00815023	3
	GO:0005654	nucleoplasm	CC	0.0154145	3
	GO:1901363	heterocyclic compound binding	MF	0.0155388	3
	GO:0090079	translation regulator activity, nucleic acid binding	MF	0.0169437	3
	GO:0044770	cell cycle phase transition	BP	3.50162e-06	4
	GO:0033554	cellular response to stress	BP	8.57966e-06	4
	GO:0019884	antigen processing and presentation of exogenous antigen	BP	1.10146e-05	4
	GO:0070013	intracellular organelle lumen	CC	1.74384e-05	4
	GO:0098763	mitotic cell cycle phase	BP	1.87348e-05	4
	GO:0048002	antigen processing and presentation of peptide antigen	BP	1.94656e-05	4
	GO:0043233	organelle lumen	CC	1.97951e-05	4
	GO:1903047	mitotic cell cycle process	BP	2.1579e-05	4
	GO:0000278	mitotic cell cycle	BP	4.37877e-05	4
	GO:0000279	M phase	BP	0.000177559	4
	GO:0043227	membrane-bounded organelle	CC	0.000199988	4
	GO:0043231	intracellular membrane-bounded organelle	CC	0.00108026	4
	GO:0046483	heterocycle metabolic process	BP	0.00168917	4
	GO:0030133	transport vesicle	CC	0.00180541	4
	GO:0062012	regulation of small molecule metabolic process	BP	0.00201132	4
	GO:0005634	nucleus	CC	3.93187e-07	5
	GO:0044772	mitotic cell cycle phase transition	BP	3.36503e-06	5
	GO:0006974	cellular response to DNA damage stimulus	BP	6.2065e-06	5
	GO:0002478	antigen processing and presentation of exogenous peptide antigen	BP	9.76039e-06	5
	GO:0031981	nuclear lumen	CC	9.85816e-06	5
	GO:0000087	mitotic M phase	BP	0.000104046	5
	GO:0030660	Golgi-associated vesicle membrane	CC	0.000111578	5
	GO:0042770	signal transduction in response to DNA damage	BP	0.000442295	5
	GO:0030658	transport vesicle membrane	CC	0.000453432	5
	GO:0035967	cellular response to topologically incorrect protein	BP	0.0005281	5
	GO:0005798	Golgi-associated vesicle	CC	0.00165894	5
	GO:0072331	signal transduction by p53 class mediator	BP	0.00216576	5
	GO:0031347	regulation of defense response	BP	0.0041746	5
	GO:0034976	response to endoplasmic reticulum stress	BP	0.00428366	5
	GO:0031327	negative regulation of cellular biosynthetic process	BP	0.0056599	5
cyan (302)-sali-up	GO:0036094	small molecule binding	MF	0.0224396	3
	GO:0014823	response to activity	BP	0.0264319	3
	GO:0072379	ER membrane insertion complex	CC	0.0266961	3
	GO:0033061	DNA recombinase mediator complex	CC	0.0266961	3
	GO:0051883	killing of cells in other organism involved in symbiotic interaction	BP	0.0266961	3
	GO:0051051	negative regulation of transport	BP	0.0309352	3
	GO:0019882	antigen processing and presentation	BP	0.0385095	3
	GO:0009056	catabolic process	BP	0.0387169	3
	GO:0043271	negative regulation of ion transport	BP	0.000590286	4
	GO:0032410	negative regulation of transporter activity	BP	0.00119255	4
	GO:0006766	vitamin metabolic process	BP	0.00140435	4
	GO:0044282	small molecule catabolic process	BP	0.00429207	4
	GO:0034763	negative regulation of transmembrane transport	BP	0.00807871	4
	GO:0051186	cofactor metabolic process	BP	0.00816963	4
	GO:0044092	negative regulation of molecular function	BP	0.0113067	4
	GO:0005938	cell cortex	CC	0.0123076	4
	GO:0016229	steroid dehydrogenase activity	MF	0.012528	4
	GO:0070279	vitamin B6 binding	MF	0.0134378	4
	GO:0016248	channel inhibitor activity	MF	0.0146962	4
	GO:0008217	regulation of blood pressure	BP	0.0187877	4
	GO:0048002	antigen processing and presentation of peptide antigen	BP	0.022889	4
	GO:0099106	ion channel regulator activity	MF	0.0238573	4
	GO:0009237	siderophore metabolic process	BP	0.0266961	4
	GO:0032413	negative regulation of ion transmembrane transporter activity	BP	0.000845099	5
	GO:0034766	negative regulation of ion transmembrane transport	BP	0.00236988	5
	GO:0051188	cofactor biosynthetic process	BP	0.00517	5
	GO:0045600	positive regulation of fat cell differentiation	BP	0.00607583	5
	GO:0045598	regulation of fat cell differentiation	BP	0.00607583	5
	GO:0009110	vitamin biosynthetic process	BP	0.007528	5
	GO:0016620	oxidoreductase activity, acting on the aldehyde or oxo group of donors, NAD or NADP as acceptor	MF	0.00912007	5
	GO:0030863	cortical cytoskeleton	CC	0.0113926	5
	GO:0006778	porphyrin-containing compound metabolic process	BP	0.0113926	5
	GO:0006767	water-soluble vitamin metabolic process	BP	0.0132636	5
	GO:0071875	adrenergic receptor signaling pathway	BP	0.0134378	5
	GO:0016713	oxidoreductase activity, acting on paired donors, with incorporation or reduction of molecular oxygen, reduced iron-sulfur protein as one donor, and incorporation of one atom of oxygen	MF	0.0134378	5
	GO:0016900	oxidoreductase activity, acting on the CH-OH group of donors, disulfide as acceptor	MF	0.0134378	5
	GO:0008391	arachidonic acid monooxygenase activity	MF	0.0134378	5
	GO:0051881	regulation of mitochondrial membrane potential	BP	0.0134378	5
yellow (1814)-sali up	GO:0016874	ligase activity	MF	0.00409816	3
	GO:0022404	molting cycle process	BP	0.00419777	3
	GO:0043433	negative regulation of DNA-binding transcription factor activity	BP	0.00456603	3
	GO:0042303	molting cycle	BP	0.00699049	3
	GO:0043696	dedifferentiation	BP	0.023882	3
	GO:1903046	meiotic cell cycle process	BP	0.0429746	3
	GO:0051321	meiotic cell cycle	BP	0.0493785	3
	GO:0070997	neuron death	BP	0.00015215	4
	GO:1901135	carbohydrate derivative metabolic process	BP	0.000417019	4
	GO:0070739	protein-glutamic acid ligase activity	MF	0.000557746	4
	GO:0070735	protein-glycine ligase activity	MF	0.000903694	4
	GO:0016879	ligase activity, forming carbon-nitrogen bonds	MF	0.00114064	4
	GO:0044092	negative regulation of molecular function	BP	0.00274039	4
	GO:0022405	hair cycle process	BP	0.00419777	4
	GO:0016822	hydrolase activity, acting on acid carbon-carbon bonds	MF	0.00516548	4
	GO:0042633	hair cycle	BP	0.00661955	4
	GO:1903707	negative regulation of hemopoiesis	BP	0.00799018	4
	GO:0019637	organophosphate metabolic process	BP	0.01014	4
	GO:0005942	phosphatidylinositol 3-kinase complex	CC	0.0198932	4
	GO:0060411	cardiac septum morphogenesis	BP	0.0202692	4
	GO:0003279	cardiac septum development	BP	0.0202692	4
	GO:0043231	intracellular membrane-bounded organelle	CC	0.0217648	4
	GO:1901215	negative regulation of neuron death	BP	0.000722966	5
	GO:1901214	regulation of neuron death	BP	0.000722966	5
	GO:0016881	acid-amino acid ligase activity	MF	0.00186447	5
	GO:0051100	negative regulation of binding	BP	0.00252334	5
	GO:1990399	epithelium regeneration	BP	0.0026126	5
	GO:0051402	neuron apoptotic process	BP	0.0026126	5
	GO:0006665	sphingolipid metabolic process	BP	0.00273409	5
	GO:1901136	carbohydrate derivative catabolic process	BP	0.00413857	5
	GO:0031228	intrinsic component of Golgi membrane	CC	0.00419777	5
	GO:0008655	pyrimidine-containing compound salvage	BP	0.00439207	5
	GO:0016823	hydrolase activity, acting on acid carbon-carbon bonds, in ketonic substances	MF	0.00516548	5
	GO:0006643	membrane lipid metabolic process	BP	0.00663569	5
	GO:1901137	carbohydrate derivative biosynthetic process	BP	0.00705192	5
	GO:0045638	negative regulation of myeloid cell differentiation	BP	0.00766825	5
	GO:0004738	pyruvate dehydrogenase activity	MF	0.0096887	5
black (1331)-sali down	GO:0031254	cell trailing edge	CC	0.0016946	3
	GO:0006903	vesicle targeting	BP	0.00354358	3
	GO:0022406	membrane docking	BP	0.00373174	3
	GO:0032196	transposition	BP	0.0121988	3
	GO:0043226	organelle	CC	0.0188863	3
	GO:0042752	regulation of circadian rhythm	BP	0.0196082	3
	GO:0043229	intracellular organelle	CC	0.0208937	3
	GO:0036452	ESCRT complex	CC	0.0289491	3
	GO:0060187	cell pole	CC	0.0289491	3
	GO:0016491	oxidoreductase activity	MF	0.0294377	3
	GO:0030246	carbohydrate binding	MF	0.0306624	3
	GO:0043903	regulation of interspecies interactions between organisms	BP	0.0319288	3
	GO:0030431	sleep	BP	0.0344077	3
	GO:0051656	establishment of organelle localization	BP	0.000440664	4
	GO:0051186	cofactor metabolic process	BP	0.00052903	4
	GO:0051640	organelle localization	BP	0.00121925	4
	GO:0048199	vesicle targeting, to, from or within Golgi	BP	0.00207369	4
	GO:0006900	vesicle budding from membrane	BP	0.00729436	4
	GO:0048636	positive regulation of muscle organ development	BP	0.00833725	4
	GO:1901863	positive regulation of muscle tissue development	BP	0.00833725	4
	GO:0007098	centrosome cycle	BP	0.00848788	4
	GO:0043021	ribonucleoprotein complex binding	MF	0.0121988	4
	GO:0016817	hydrolase activity, acting on acid anhydrides	MF	0.0147735	4
	GO:0035383	thioester metabolic process	BP	0.0160443	4
	GO:0031023	microtubule organizing center organization	BP	0.017254	4
	GO:0044255	cellular lipid metabolic process	BP	0.0199233	4
	GO:0062013	positive regulation of small molecule metabolic process	BP	0.0216078	4
	GO:0016627	oxidoreductase activity, acting on the CH-CH group of donors	MF	0.0224659	4
	GO:0006732	coenzyme metabolic process	BP	0.000179972	5
	GO:0051650	establishment of vesicle localization	BP	0.000715787	5
	GO:0048200	Golgi transport vesicle coating	BP	0.00153516	5
	GO:0048194	Golgi vesicle budding	BP	0.00153516	5
	GO:0051648	vesicle localization	BP	0.00163782	5
	GO:0035337	fatty-acyl-CoA metabolic process	BP	0.00183449	5
	GO:0006901	vesicle coating	BP	0.00617407	5
	GO:1903900	regulation of viral life cycle	BP	0.0065808	5
	GO:0051188	cofactor biosynthetic process	BP	0.00730656	5
	GO:0045844	positive regulation of striated muscle tissue development	BP	0.00833725	5
	GO:0001977	renal system process involved in regulation of blood volume	BP	0.00864536	5
	GO:0033986	response to methanol	BP	0.00937762	5
	GO:0035936	testosterone secretion	BP	0.00937762	5
	GO:0001743	optic placode formation	BP	0.00937762	5
	GO:0016779	nucleotidyltransferase activity	MF	0.0114838	5
darkgreen (104)-sali down	GO:0051301	cell division	BP	0.00353058	3
	GO:0032045	guanyl-nucleotide exchange factor complex	CC	0.00530049	3
	GO:0016192	vesicle-mediated transport	BP	0.0121225	3
	GO:0002520	immune system development	BP	0.0222909	3
	GO:0005515	protein binding	MF	0.026715	3
	GO:0030029	actin filament-based process	BP	0.0296654	3
	GO:0044703	multi-organism reproductive process	BP	0.0404418	3
	GO:0048609	multicellular organismal reproductive process	BP	0.0458406	3
	GO:0006887	exocytosis	BP	0.00584185	4
	GO:0034440	lipid oxidation	BP	0.00652175	4
	GO:0005324	long-chain fatty acid transporter activity	MF	0.0105733	4
	GO:0002568	somatic diversification of T cell receptor genes	BP	0.0105733	4
	GO:0060627	regulation of vesicle-mediated transport	BP	0.0125868	4
	GO:0030036	actin cytoskeleton organization	BP	0.0145534	4
	GO:0072338	cellular lactam metabolic process	BP	0.0158185	4
	GO:0070849	response to epidermal growth factor	BP	0.0163688	4
	GO:0048534	hematopoietic or lymphoid organ development	BP	0.0193765	4
	GO:0051913	regulation of synaptic plasticity by chemical substance	BP	0.0210363	4
	GO:0035097	histone methyltransferase complex	CC	0.0246739	4
	GO:0045136	development of secondary sexual characteristics	BP	0.0262268	4
	GO:0031410	cytoplasmic vesicle	CC	0.0283887	4
	GO:0097708	intracellular vesicle	CC	0.0283887	4
	GO:0016627	oxidoreductase activity, acting on the CH-CH group of donors	MF	0.0288112	4
	GO:0097696	receptor signaling pathway via STAT	BP	0.00195792	5
	GO:0017157	regulation of exocytosis	BP	0.00261855	5
	GO:0031982	vesicle	CC	0.0035775	5
	GO:0070063	RNA polymerase binding	MF	0.00530049	5
	GO:0044665	MLL1/2 complex	CC	0.00597501	5
	GO:0031033	myosin filament organization	BP	0.00652175	5
	GO:0019395	fatty acid oxidation	BP	0.00652175	5
	GO:0002681	somatic recombination of T cell receptor gene segments	BP	0.0105733	5
	GO:1902117	positive regulation of organelle assembly	BP	0.0105733	5
	GO:0030258	lipid modification	BP	0.0109489	5
	GO:0007219	Notch signaling pathway	BP	0.0124299	5
	GO:0042660	positive regulation of cell fate specification	BP	0.0158185	5
	GO:0030097	hemopoiesis	BP	0.0204975	5
	GO:0051914	positive regulation of synaptic plasticity by chemical substance	BP	0.0210363	5
	GO:0045921	positive regulation of exocytosis	BP	0.0210363	5
